# Supplementary material for: Network Analysis of a Membrane-Enriched Brain Proteome across Stages of Alzheimer’s Disease
Source: MDPI journal article supplement (doi:10.3390/proteomes7030030), 2019-08-27
Supplement: s1 [file s1]

Research Article

# Network Analysis of a Membrane-Enriched Brain Proteome in Alzheimer's Disease

Lenora Higginbotham<sup>1\*</sup>, Eric B. Dammer<sup>2\*</sup>, Duc M. Duong<sup>2</sup>, Erica Modeste<sup>2</sup>, Thomas Montine<sup>3</sup>, James J. Lah<sup>1</sup>, Allan I. Levey<sup>1</sup>, and Nicholas T. Seyfried<sup>1,2,#</sup>

<sup>1</sup> Department of Neurology, Emory University School of Medicine, Atlanta, GA 30322

<sup>2</sup> Department of Biochemistry, Emory University School of Medicine, Atlanta, GA 30322

<sup>3</sup> Department of Pathology, Stanford University School of Medicine, Stanford, CA 94305

\* Both authors contributed equally to this manuscript.

# Correspondence: nseyfri@emory.edu; Tel.: 1-404-712-9783

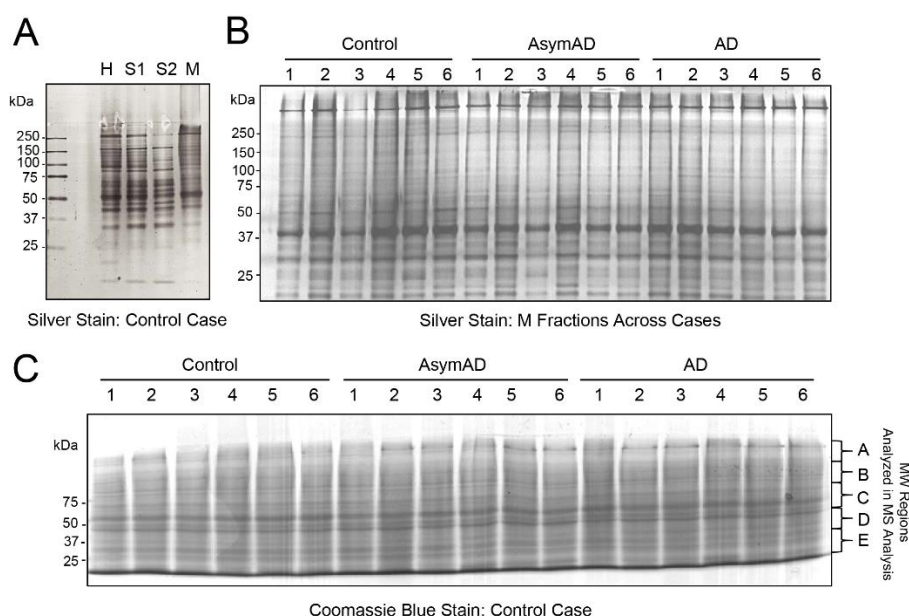

**Figure S1. Preparation of Membrane-Enriched Samples.** (A) Silver stain analysis of sequential fractions of an individual control case demonstrated differential banding between the cytosol-enriched S2 and membrane-enriched M fractions. (B) Silver stain analysis of the M fractions from the 18 analyzed cases demonstrated consistent protein integrity and intensity throughout. (C) Coomassie-stained SDS-page gel of the 18 alkylated M fractions. Prior to proteomic analysis, each sample lane was cut into five gel bands corresponding to the approximate molecular weight (MW) ranges shown on the right. Abbreviations: H, Homogenate; S, Supernatant; P, Pellet; MW, Molecular Weight.

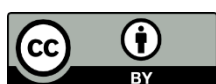

© 2019 by the authors. Submitted for possible open access publication under the terms and conditions of the Creative Commons Attribution (CC BY) license (<http://creativecommons.org/licenses/by/4.0/>).
