# Supplementary material for: Network Analysis of a Membrane-Enriched Brain Proteome across Stages of Alzheimer’s Disease
Source: Proteomes. 2019 Aug 27;7(3):30. doi: 10.3390/proteomes7030030 (PMC6789842; doi:10.3390/proteomes7030030)
Supplement: Supplementary file 1 [file proteomes-07-00030-s001.zip › Higginbotham_MembraneProteomeManuscript_TableS1_FINAL.xlsx]

## Sheet: Table S1
	Table S1. Case Characteristics
			General Characteristics					Clinical Characteristics			Neuropathological Characteristics										AD Risk
									CASI3				CERAD6			Lewy Bodies (n)
	Sample	Alternate ID	Age	Sex	Race	Edu1		LED2			PMI4	Brain Wt5		BRAAK7	AA8	SN or LC9	FC or TC10	Athero11	Infarcts12		ApoE13
	Control
	UWA479	06-029	78	M	White	21		218	99		4	1550	0	0	0	0	0	1	0		2/3
	UWA420	04-212	87	F	White	16		144	97		4	1300	0	2	0	0	0	1	0		3/3
	UWA506	06-095	79	F	White	12		257	95		2.5	1120	0	2	0	0	0	2	0		3/3
	UWA531	07-031	92	F	White	12		727	96		5.5	1080	0	2	0	0	0	1	0		3/3
	UWA431	05-106	86	M	White	7		769	89		2.5	1120	0	2	0	0	0	1	2		3/3
	UWA623	08-134	98	F	White	12		670	88		4	1150	0	1	0	0	0	3	2		3/3
	Mean (±SD)		86.7 ±7.6			13.3 ±4.7		464 ±286	94 ±4.5		3.8 ±1.1	1220 ±179	0 ±0	1.5 ±0.8	0 ±0	0 ±0	0 ±0	1.5 ±0.8	0.7 ±1
	Asymptomatic AD
	UWA626	08-148	86	M	White	13		319	98		3	1390	2	3	0	1	0	1	0		3/3
	UWA596	08-066	79	M	White	16		487	97		2.5	1290	2	3	0	0	0	2	0		3/3
	UWA419	04-190	75	F	White	16		467	91		5.5	1220	2	3	0	0	0	1	0		4/4
	UWA422	05-035	77	F	White	12		372	96		3	1260	2	4	1	0	0	2	1		3/4
	UWA556	07-093	86	F	Asian	12		436	91		6.5	1045	2	4	1	0	0	2	0		3/4
	UWA558	07-100	92	F	White	16		64	97		6	1180	2	3	1	0	0	1	0		4/4
	Mean (±SD)		82.5 ±6.5			14.2 ±2		358 ±157	95 ±3.2		4.4 ±1.8	1231 ±116	2 ±0	3.3 ±0.5	0.5 ±0.5	0.2 ±0.4	0 ±0	1.5 ±0.5	0.2 ±0.4
	Symptomatic AD
	UWA576	08-013*	95	M	White	8		560	84		6	1245	3	3	0	0	0	2	0		3/3
	UWA579	08-018	78	F	White	6		1561	70		5.5	1140	3	6	0	0	0	1	0		2/3
	UWA580	08-021*	84	M	White	12		553	87		2.5	1300	2	3	0	0	0	1	0		3/3
	UWA612	08-104	85	F	White	14		1066	85		3	1160	3	6	2	0	0	2	0		2/4
	UWA614	08-106*	89	M	White	13		1602	88		8.5	1200	3	5	0	0	0	2	0		3/3
	UWA530	07-029	89	M	White	12		1568	78		2.5	1200	3	6	1	0	0	2	0		3/3
	Mean (±SD)		86.7 ±5.8			10.8 ±3.1		1152 ±502	82 ±6.8		4.7 ±2.4	1208 ±58	3 ±0.4	4.8 ±1.5	0.5 ±0.8	0 ±0	0 ±0	1.7 ±0.5	0 ±0
	1Edu - Education (years). 2LED – Last Evaluation to Death (days). 3CASI - Cognitive Abilities Screening Instrument. 4PMI – Postmortem Interval (hrs). 5Brain Wt – Brain Weight (grams).
	6CERAD – Consortium to Establish a Registry for Alzheimer’s Disease score (0–Absent, 1–Sparse, 2–Moderate, 3–Frequent / Severe).
	7BRAAK Staging for Neurofibrillary Tangles (1–I, 2–II, 3–III, etc). 8Amyloid Angiopathy (0–Absent, 1–Mild, 2–Moderate, 3–Severe). 9SN – Substantia Nigra; LC – Locus Coeruleus.
	10FC – Frontal Cortex; TC – Temporal Cortex. 11Atherosclerosis (0–Absent, 1–Mild, 2–Moderate, 3–Severe). 12Infarcts (n). 13ApoE genotype.
