# Supplementary material for: Network Analysis of a Membrane-Enriched Brain Proteome across Stages of Alzheimer’s Disease
Source: Proteomes. 2019 Aug 27;7(3):30. doi: 10.3390/proteomes7030030 (PMC6789842; doi:10.3390/proteomes7030030)
Supplement: Supplementary file 1 [file proteomes-07-00030-s001.zip › Higginbotham_MembraneProteomeManuscript_TableS2-S4_FINAL.xlsx]

## Sheet: Table S2
Table S2: Correlation to Module Eigenproteins (kME) of All Proteins Analyzed (n=1,808) following WPCNA Analysis
Protein Unique ID	Module Assignment (Number)	Module Assigment (Color)	kME Dark Orange	kME Dark Turquoise	kME Brown	kME Red	kME Turquoise	kME Light Green	kME White	kME Black	kME Green Yellow	kME Cyan	kME Salmon	kME Dark Red	kME Pink	kME Tan	kME Magenta	kME Light Cyan	kME Royal Blue	kME Midnight Blue	kME Purple	kME Light Yellow	kME Grey60	kME Blue	kME Yellow	kME Dark Green	kME Dark Grey	kME Green	kME Orange	kME Grey	kME Table Sort Vector
TOMM70A|NP_055635.3	M4	yellow	-0.071703	-0.374759	-0.764429	-0.717667	-0.87604	-0.282243	-0.111462	-0.683897	-0.512424	-0.172636	-0.0856579	0.637535	0.629866	0.336231	0.627396	0.374385	0.431459	0.648036	0.359523	0.715486	0.595574	0.799757	0.96603	-0.0816322	-0.186283	-0.099	0.284627	0.068874	yellow|0.966
COX7A2L|NP_004709.2	M4	yellow	-0.184198	-0.376223	-0.778559	-0.711553	-0.862816	-0.351099	-0.104418	-0.564245	-0.362239	-0.0458469	-0.013233	0.60341	0.588432	0.411501	0.639399	0.390895	0.448809	0.784814	0.49677	0.636449	0.671362	0.763209	0.957502	0.0558419	-0.126242	-0.183159	0.324138	0.0395277	yellow|0.9575
NDUFB11|NP_061929.2	M4	yellow	0.0612125	-0.289016	-0.681632	-0.560223	-0.821627	-0.343806	-0.163369	-0.658486	-0.505667	-0.194248	0.0591699	0.525214	0.613891	0.353369	0.493589	0.347283	0.329708	0.620866	0.327735	0.676576	0.565142	0.815061	0.951862	-0.0820633	-0.124969	-0.188226	0.202267	0.00128516	yellow|0.9519
HKDC1|NP_079406.3	M4	yellow	-0.286437	-0.315467	-0.728389	-0.68473	-0.798205	-0.407435	-0.190733	-0.562275	-0.396734	-0.210896	0.00969942	0.593881	0.565115	0.285305	0.644963	0.275705	0.340023	0.726847	0.424576	0.596383	0.579808	0.681106	0.948921	0.0993037	-0.180781	-0.288021	0.258405	0.086361	yellow|0.9489
SLC25A31|NP_112581.1	M4	yellow	-0.136213	-0.323929	-0.636864	-0.655914	-0.771634	-0.338244	-0.181577	-0.574516	-0.398763	-0.198448	-0.0386863	0.58467	0.516715	0.254404	0.588332	0.196896	0.337722	0.598666	0.321911	0.726936	0.458703	0.680785	0.946491	0.0412697	-0.1493	-0.198077	0.274943	0.0496912	yellow|0.9465
SLC25A4|NP_001142.2	M4	yellow	-0.0668313	-0.276065	-0.625054	-0.638729	-0.793303	-0.342913	-0.190168	-0.605604	-0.426578	-0.17174	-0.0359992	0.593116	0.551857	0.302564	0.556921	0.203675	0.344647	0.594083	0.349849	0.722751	0.489895	0.72176	0.943904	-0.00127236	-0.0957922	-0.168254	0.249632	0.0371674	yellow|0.9439
WDR37|NP_054742.2	M4	yellow	-0.0977763	-0.262893	-0.71075	-0.566271	-0.869702	-0.426266	-0.216634	-0.786868	-0.555991	-0.181007	0.0884498	0.501623	0.773241	0.456993	0.661829	0.379923	0.377663	0.670201	0.416137	0.553948	0.628226	0.83717	0.93413	-0.0639598	-0.0495334	-0.271217	0.212142	0.00774569	yellow|0.9341
ATP5H|NP_006347.1	M4	yellow	-0.0274273	-0.300248	-0.749262	-0.57066	-0.901913	-0.449002	-0.141187	-0.689509	-0.471933	-0.0438107	0.112802	0.486385	0.749207	0.566573	0.599026	0.466111	0.422082	0.732505	0.494349	0.579977	0.729966	0.870947	0.927871	-0.0373537	0.0371547	-0.202457	0.225491	-0.0933128	yellow|0.9279
HK2|NP_000180.2	M4	yellow	-0.20285	-0.37268	-0.769972	-0.657595	-0.838185	-0.367134	-0.176024	-0.600522	-0.364781	-0.0444096	0.102689	0.547345	0.646948	0.456327	0.640983	0.405069	0.440768	0.834137	0.55073	0.546791	0.688185	0.767832	0.927585	0.132404	-0.0655009	-0.299005	0.229777	0.0775247	yellow|0.9276
ATP5J2|NP_001003713.1	M4	yellow	-0.099667	-0.514983	-0.635731	-0.597765	-0.93639	-0.340607	0.00564892	-0.662522	-0.562287	-0.0875275	0.0375825	0.46264	0.533556	0.371171	0.509001	0.453558	0.387945	0.615359	0.419586	0.843994	0.666554	0.854953	0.919528	0.0110636	-0.0499043	-0.0371874	0.461931	-0.0151718	yellow|0.9195
GDAP1|NP_061845.2	M4	yellow	0.0587328	-0.25132	-0.708661	-0.596014	-0.829094	-0.326582	-0.156351	-0.641885	-0.485845	-0.107637	0.116694	0.514632	0.675494	0.444261	0.587468	0.442563	0.426154	0.596015	0.341124	0.656713	0.566076	0.780874	0.919026	-0.0963009	-0.114312	-0.263297	0.0873972	-0.030756	yellow|0.919
ND4|YP_003024035.1	M4	yellow	0.00961551	-0.474514	-0.635991	-0.589901	-0.876945	-0.27681	-0.142396	-0.720925	-0.50492	-0.0411029	0.0671566	0.504676	0.58299	0.435353	0.469233	0.354397	0.414328	0.694493	0.495159	0.800654	0.642201	0.886265	0.916107	0.00398976	0.0464039	-0.0724832	0.345621	0.0581812	yellow|0.9161
SLC3A2|NP_002385.3	M4	yellow	-0.403996	-0.582092	-0.66	-0.715792	-0.845667	-0.457428	-0.0979892	-0.603582	-0.462661	-0.177349	-0.0630883	0.530756	0.465537	0.249473	0.630942	0.285952	0.336094	0.710435	0.466703	0.639145	0.591992	0.707825	0.908234	0.212452	-0.090084	-0.111147	0.540714	0.174423	yellow|0.9082
CEND1|NP_057648.2	M4	yellow	0.0111929	-0.314794	-0.732573	-0.535517	-0.876914	-0.28034	-0.105177	-0.726971	-0.451706	-0.0441878	0.195484	0.50943	0.716209	0.500717	0.588724	0.484917	0.50999	0.727863	0.501919	0.702295	0.730767	0.86036	0.903772	-0.0083134	-0.0210697	-0.273144	0.173057	0.0393056	yellow|0.9038
SLC25A18|NP_113669.1	M4	yellow	-0.0895499	-0.244783	-0.838918	-0.699312	-0.726298	-0.259019	-0.0971243	-0.487962	-0.099952	0.0478794	0.0247978	0.694591	0.623093	0.430293	0.752109	0.332338	0.632252	0.800899	0.527814	0.507019	0.601471	0.628584	0.884806	0.162593	-0.125304	-0.320581	0.100246	0.192425	yellow|0.8848
ATP5O|NP_001688.1	M4	yellow	-0.130799	-0.313271	-0.835386	-0.642268	-0.829355	-0.339446	-0.0983584	-0.679292	-0.337594	0.0512877	0.123478	0.553877	0.694251	0.529409	0.734134	0.48577	0.587946	0.827518	0.592986	0.495226	0.703411	0.78891	0.881979	-0.0167643	-0.0995517	-0.286662	0.232864	0.151478	yellow|0.882
SLC25A11|NP_003553.2	M4	yellow	0.0185655	-0.200749	-0.596573	-0.699149	-0.812367	-0.219747	-0.194581	-0.623535	-0.415859	-0.00613842	-0.0488602	0.670542	0.634752	0.407179	0.557931	0.2454	0.462936	0.604159	0.472363	0.606437	0.518971	0.708321	0.877797	0.0934544	0.0122539	-0.164491	0.0549508	0.164236	yellow|0.8778
SLC25A12|NP_003696.2	M4	yellow	-0.192899	-0.452599	-0.461071	-0.779762	-0.747315	-0.347283	-0.317258	-0.552068	-0.587674	-0.285553	-0.252603	0.601335	0.371518	0.147867	0.353961	0.0126175	0.10631	0.47952	0.280835	0.747709	0.355516	0.648592	0.876233	0.0384855	-0.0139993	0.0916696	0.323832	0.0621344	yellow|0.8762
STX12|NP_803173.1	M4	yellow	0.106434	-0.150959	-0.768393	-0.502791	-0.794457	-0.328454	-0.0571155	-0.510304	-0.231917	0.0471853	0.163948	0.542104	0.699812	0.54611	0.56067	0.490827	0.516737	0.759522	0.49399	0.469006	0.746954	0.7535	0.866137	0.0740507	-0.0160126	-0.315869	0.0548259	-0.0152158	yellow|0.8661
MGST3|NP_004519.1	M4	yellow	-0.0802081	-0.405646	-0.618517	-0.710763	-0.882548	-0.320811	0.0424051	-0.527744	-0.447855	-0.0939738	-0.194584	0.620153	0.502342	0.318275	0.537046	0.324885	0.41719	0.479803	0.328365	0.835028	0.599314	0.705009	0.865105	0.025516	-0.0150104	0.108306	0.380033	-0.0534801	yellow|0.8651
CYTB|YP_003024038.1	M4	yellow	-0.0972957	-0.492151	-0.462642	-0.530092	-0.823824	-0.363088	-0.098452	-0.612891	-0.65978	-0.281325	-0.073851	0.385077	0.396655	0.19888	0.32663	0.272768	0.124436	0.433956	0.19914	0.852634	0.499042	0.776874	0.862482	-0.107614	-0.070461	0.0754737	0.520964	-0.117378	yellow|0.8625
ATP5F1|NP_001679.2	M4	yellow	-0.334536	-0.39303	-0.528899	-0.692641	-0.716061	-0.369132	-0.11142	-0.483746	-0.482125	-0.383132	-0.208378	0.593826	0.284327	0.00654216	0.478515	0.114792	0.179947	0.465831	0.190199	0.777667	0.442337	0.558484	0.85691	-0.00408612	-0.2454	-0.0248904	0.502225	0.108523	yellow|0.8569
NLGN2|NP_065846.1	M4	yellow	-0.143608	-0.417773	-0.612491	-0.415621	-0.777114	-0.305334	-0.138585	-0.733989	-0.568511	-0.176062	0.251942	0.267036	0.599506	0.330319	0.572655	0.44115	0.301754	0.604135	0.330112	0.617054	0.478905	0.789336	0.856283	-0.0505389	-0.199249	-0.337451	0.293674	0.0158365	yellow|0.8563
SLC25A27|NP_004268.3	M4	yellow	-0.105858	-0.337471	-0.56419	-0.665984	-0.595457	-0.207538	-0.273231	-0.470508	-0.34898	-0.291318	-0.236875	0.578027	0.442232	0.110299	0.52228	0.0265846	0.206334	0.45029	0.108424	0.602893	0.21303	0.525938	0.845602	0.00558614	-0.213306	-0.0792848	0.195602	0.0176625	yellow|0.8456
SFXN1|NP_073591.2	M4	yellow	-0.0637115	-0.34185	-0.535566	-0.427532	-0.716043	-0.327145	-0.0374664	-0.584497	-0.530141	-0.408425	-0.116073	0.434243	0.447772	0.0636058	0.429539	0.214026	0.145853	0.394037	0.0831107	0.650054	0.417026	0.669364	0.839378	-0.0711653	-0.244342	-0.0312709	0.425855	-0.0126056	yellow|0.8394
PRKCB|NP_002729.2	M4	yellow	-0.268717	-0.472724	-0.756533	-0.76575	-0.729398	-0.210747	-0.0580756	-0.532103	-0.309489	-0.209068	-0.285575	0.738808	0.446678	0.149284	0.635934	0.262997	0.449521	0.700556	0.358768	0.540877	0.620235	0.609583	0.835347	0.0840235	-0.233588	-0.00958386	0.477712	0.316447	yellow|0.8353
HK3|NP_002106.2	M4	yellow	-0.194004	-0.259166	-0.696481	-0.575587	-0.671737	-0.231013	-0.247752	-0.551373	-0.353228	-0.0408898	0.196539	0.441248	0.55423	0.361954	0.566356	0.376795	0.356192	0.789631	0.488583	0.378544	0.495787	0.657253	0.829628	0.0377082	-0.245368	-0.435051	0.0749707	0.166651	yellow|0.8296
TMEM126A|NP_115649.1	M4	yellow	0.0561492	-0.221083	-0.71063	-0.506847	-0.717754	-0.289003	-0.254513	-0.613831	-0.338316	-0.0708534	0.207618	0.534442	0.638964	0.470687	0.435808	0.40308	0.411033	0.828338	0.520906	0.438489	0.747802	0.772759	0.828332	0.0292496	0.00404132	-0.349526	0.0611556	0.159585	yellow|0.8283
MPC2|NP_056230.1	M4	yellow	-0.306242	-0.191161	-0.411086	-0.5398	-0.678666	-0.428718	-0.249439	-0.62054	-0.532587	-0.388914	-0.140767	0.514646	0.476234	0.0677269	0.522226	-0.0119092	0.10388	0.425562	0.239458	0.467185	0.327368	0.554038	0.81288	0.105625	-0.116688	-0.174065	0.316541	0.170674	yellow|0.8129
SLC25A3|NP_002626.1	M4	yellow	-0.205305	-0.520039	-0.425829	-0.742472	-0.668252	-0.265134	-0.368543	-0.591015	-0.570406	-0.197968	-0.0928003	0.508239	0.289987	0.159505	0.297311	0.0272136	0.13159	0.550432	0.373308	0.734887	0.309356	0.647555	0.812822	0.0293545	-0.0241637	0.00181177	0.299482	0.198598	yellow|0.8128
STX7|NP_003560.2	M4	yellow	-0.0353085	-0.287087	-0.614267	-0.42792	-0.741093	-0.404623	-0.0904804	-0.513596	-0.373308	-0.263002	-0.0964365	0.470134	0.627175	0.295707	0.487021	0.274008	0.230706	0.517804	0.226121	0.460253	0.594414	0.663811	0.807266	0.0860692	2.87e-05	-0.0800536	0.271626	-0.135949	yellow|0.8073
NDUFA11|NP_783313.1	M4	yellow	-0.0282202	-0.128081	-0.674579	-0.398613	-0.806479	-0.319645	-0.018117	-0.639196	-0.417745	-0.0647983	0.187568	0.375116	0.797965	0.483978	0.709213	0.532917	0.458956	0.527745	0.322061	0.452867	0.591148	0.705178	0.799114	-0.0186481	-0.109952	-0.370487	0.0599776	-0.120274	yellow|0.7991
TMEM160|NP_060324.1	M4	yellow	-0.254393	-0.175698	-0.629277	-0.674579	-0.757958	-0.33138	-0.176216	-0.616597	-0.385122	-0.0614756	0.0514553	0.637501	0.596472	0.348187	0.630501	0.279267	0.459414	0.706593	0.58864	0.4018	0.616178	0.619383	0.790423	0.190865	-0.0427132	-0.317591	0.0995205	0.350904	yellow|0.7904
CASKIN1|NP_065815.1	M4	yellow	0.017355	-0.328403	-0.821868	-0.4543	-0.820956	-0.2616	0.176906	-0.511216	-0.177772	0.224877	0.199082	0.384437	0.705212	0.600677	0.733952	0.663289	0.669385	0.710546	0.515508	0.474521	0.685494	0.740833	0.789795	0.0895758	-0.0865403	-0.256654	0.194396	-0.0662356	yellow|0.7898
RAB3A|NP_002857.1	M4	yellow	-0.175367	-0.237947	-0.558042	-0.443505	-0.568167	-0.327929	-0.522061	-0.773508	-0.461792	-0.235515	0.251871	0.352103	0.688505	0.327668	0.563893	0.0993751	0.205217	0.6943	0.43132	0.264238	0.294169	0.662875	0.789429	0.0984412	-0.0518888	-0.516496	-0.0526848	0.233429	yellow|0.7894
PTDSS1|NP_055569.1	M4	yellow	-0.404406	-0.315985	-0.495368	-0.569548	-0.585797	-0.431103	-0.444278	-0.676056	-0.622417	-0.474139	0.0884032	0.424548	0.417165	0.0507728	0.433031	0.0669643	0.0252056	0.6079	0.316531	0.387536	0.347705	0.582229	0.788738	0.0333073	-0.220203	-0.359396	0.207715	0.320723	yellow|0.7887
RMND1|NP_060379.2	M4	yellow	0.0367189	-0.250513	-0.376839	-0.485518	-0.719411	-0.30436	-0.242196	-0.613481	-0.631566	-0.204395	-0.043286	0.367269	0.484348	0.277543	0.281909	0.155582	0.0879846	0.367722	0.21104	0.682559	0.332205	0.719645	0.786107	-0.159843	0.00273141	0.0100137	0.211484	-0.146192	yellow|0.7861
SLC7A5|NP_003477.4	M4	yellow	-0.191051	-0.170706	-0.704573	-0.603233	-0.717098	-0.451247	-0.139623	-0.541096	-0.400764	-0.244245	-0.021209	0.563555	0.588959	0.314821	0.575645	0.302029	0.321804	0.589037	0.348186	0.46779	0.619955	0.616431	0.784727	-0.056763	-0.101654	-0.186968	0.1545	0.021473	yellow|0.7847
AK5|NP_777283.1	M4	yellow	-0.188762	-0.37673	-0.711329	-0.69041	-0.724629	-0.192469	-0.133339	-0.556088	-0.335796	-0.157915	-0.0671016	0.723864	0.463572	0.22788	0.450573	0.295727	0.432755	0.81296	0.549793	0.505313	0.769093	0.662549	0.784441	0.170077	-0.0892071	-0.128325	0.261905	0.41696	yellow|0.7844
KIAA1045|NP_056112.1	M4	yellow	-0.332417	-0.268104	-0.511512	-0.788196	-0.639376	-0.378821	-0.328104	-0.520748	-0.324204	-0.13245	-0.278551	0.685975	0.470159	0.216956	0.59024	-0.0558982	0.272865	0.608246	0.451082	0.310789	0.347673	0.492575	0.783015	0.243237	0.0165727	-0.0932323	0.238767	0.315098	yellow|0.783
CISD1|NP_060934.1	M4	yellow	-0.0607579	-0.315213	-0.535796	-0.382864	-0.763773	-0.318262	-0.120801	-0.620467	-0.592865	-0.270521	0.0598922	0.301985	0.660689	0.294773	0.505627	0.410225	0.19258	0.412016	0.1558	0.484654	0.473765	0.693472	0.77829	-0.0132068	-0.111687	-0.199029	0.185454	-0.142973	yellow|0.7783
SYT2|NP_001129976.1	M4	yellow	0.191224	-0.104048	-0.92567	-0.579113	-0.673746	-0.116087	0.0462572	-0.438704	-0.0758729	0.183425	0.10645	0.582836	0.703423	0.557647	0.735856	0.614039	0.731034	0.70765	0.406901	0.349555	0.602608	0.631032	0.77623	-0.113991	-0.260293	-0.327732	-0.0948241	0.0545308	yellow|0.7762
HK1|NP_000179.2	M4	yellow	-0.346014	-0.191733	-0.481799	-0.669631	-0.64085	-0.225777	0.0366463	-0.247406	-0.257365	-0.18546	-0.232734	0.625948	0.184017	-0.0132534	0.456147	0.100482	0.245891	0.435583	0.255973	0.696747	0.397021	0.389771	0.760523	0.0842008	-0.314329	-0.0465946	0.371185	0.0941435	yellow|0.7605
RAB9A|NP_001182257.1	M4	yellow	0.00417197	-0.301926	-0.413483	-0.31438	-0.677643	-0.355068	-0.153225	-0.600748	-0.552072	-0.154827	0.19315	0.194483	0.431688	0.284545	0.352199	0.300235	0.150828	0.408284	0.234256	0.625152	0.359243	0.707546	0.758506	-0.167961	-0.0961893	-0.186631	0.306299	-0.0981217	yellow|0.7585
GAP43|NP_001123536.1	M4	yellow	-0.150746	-0.0359781	-0.478159	-0.349334	-0.651989	-0.559299	-0.425924	-0.778543	-0.529919	-0.106155	0.39771	0.189631	0.796915	0.533106	0.653751	0.229098	0.228435	0.527698	0.432371	0.249104	0.297898	0.670639	0.750283	-0.0146507	0.0764913	-0.580929	-0.114876	-0.0365541	yellow|0.7503
MSMO1|NP_006736.1	M4	yellow	-0.140176	-0.454172	-0.556854	-0.468999	-0.80865	-0.315674	0.328354	-0.321431	-0.295692	0.0413124	-0.118012	0.328664	0.357736	0.276518	0.522001	0.460616	0.365624	0.393071	0.24084	0.713098	0.511048	0.607458	0.748292	0.0663957	-0.149091	0.120219	0.576976	-0.242846	yellow|0.7483
YARS|NP_003671.1	M4	yellow	-0.145157	-0.157844	-0.710246	-0.420353	-0.578357	-0.16369	-0.174294	-0.584274	-0.200792	-0.145509	0.0223076	0.504125	0.589682	0.286046	0.642421	0.279061	0.419712	0.717764	0.35197	0.340673	0.564311	0.607328	0.743594	-0.103349	-0.240645	-0.327685	0.265796	0.157979	yellow|0.7436
C6orf136|NP_001154848.1	M4	yellow	-0.104269	-0.105381	-0.461642	-0.477443	-0.747184	-0.537332	-0.306351	-0.720308	-0.536998	-0.0237662	0.0967292	0.375613	0.729716	0.519934	0.507547	0.181798	0.23126	0.56188	0.555841	0.205689	0.454993	0.710393	0.734236	0.0924915	0.221454	-0.215841	0.0397618	0.0669941	yellow|0.7342
RAB3D|NP_004274.1	M4	yellow	-0.0493876	-0.117655	-0.554386	-0.288908	-0.545921	-0.310446	-0.39462	-0.773558	-0.455419	-0.16487	0.360745	0.220426	0.724059	0.382833	0.572559	0.219188	0.242142	0.592172	0.376989	0.219308	0.255565	0.666825	0.724896	-0.0512929	-0.115283	-0.547278	-0.114996	0.125699	yellow|0.7249
BSCL2|NP_001116427.1	M4	yellow	0.0644146	-0.337246	-0.644644	-0.478439	-0.603223	-0.0261722	-0.110851	-0.426672	-0.169223	0.0405383	0.183675	0.509111	0.357329	0.326045	0.301647	0.370043	0.46083	0.774314	0.500281	0.678829	0.667953	0.662357	0.722528	0.00254757	-0.101776	-0.217938	0.165331	0.181504	yellow|0.7225
PEX11B|NP_001171724.1	M4	yellow	0.0212059	-0.426773	-0.48319	-0.464855	-0.664314	-0.12856	0.160715	-0.4044	-0.41853	-0.316373	-0.334915	0.515329	0.251414	-0.0458702	0.273309	0.216971	0.187768	0.310196	0.0367409	0.695104	0.442549	0.577036	0.716129	-0.0402404	-0.253403	0.262752	0.536596	0.0493653	yellow|0.7161
CYFIP2|NP_001032410.1	M4	yellow	-0.0973509	-0.358546	-0.42934	-0.260747	-0.573486	-0.179027	-0.135087	-0.558069	-0.506817	-0.374583	0.155654	0.216444	0.335233	0.0785135	0.27587	0.244762	0.0850751	0.393734	0.0826487	0.799598	0.400363	0.633311	0.694663	-0.212911	-0.225985	-0.165769	0.35211	-0.124709	yellow|0.6947
CKAP4|NP_006816.2	M4	yellow	0.182992	-0.196909	-0.612729	-0.484681	-0.535973	0.0440312	0.0364621	-0.45715	-0.242787	-0.260224	-0.15832	0.670565	0.309781	0.0217613	0.314985	0.206168	0.402549	0.445666	0.138989	0.714444	0.494	0.547384	0.691826	-0.186189	-0.312439	0.0202472	0.208032	0.24476	yellow|0.6918
KPNB1|NP_002256.2	M4	yellow	-0.0215409	-0.44539	-0.344117	-0.39049	-0.738731	-0.226524	-0.0364198	-0.420886	-0.468349	0.0536253	0.184802	0.224834	0.337958	0.341808	0.217962	0.39895	0.215181	0.475155	0.386306	0.674763	0.509958	0.67532	0.688728	0.153126	0.0746881	-0.0946565	0.281628	-0.0614151	yellow|0.6887
ND5|YP_003024036.1	M4	yellow	-0.291174	-0.52924	-0.373324	-0.284154	-0.597943	-0.273574	-0.288056	-0.677436	-0.651816	-0.313207	0.251538	0.0424986	0.408245	0.178667	0.317116	0.282188	-0.0148501	0.496706	0.196968	0.566373	0.33742	0.680584	0.680564	-0.0771232	-0.138398	-0.260438	0.383679	-0.077985	yellow|0.6806
SH3GLB2|NP_064530.1	M4	yellow	-0.185016	0.0397917	-0.426647	-0.38709	-0.619819	-0.690634	-0.223818	-0.581622	-0.567408	-0.303105	0.0146163	0.320679	0.53616	0.271773	0.384457	0.0869943	-0.00632289	0.376745	0.311434	0.183347	0.377667	0.570699	0.664646	-0.129822	0.0174703	-0.134592	0.125468	-0.0493458	yellow|0.6646
POR|NP_000932.3	M4	yellow	-0.0264747	-0.338655	-0.636847	-0.485214	-0.651463	0.0436596	0.132228	-0.465036	-0.239221	-0.0357586	-0.0146506	0.572245	0.364982	0.178797	0.485172	0.500919	0.573929	0.60742	0.343528	0.578388	0.69697	0.584406	0.65568	-0.0103785	-0.279758	-0.131188	0.378429	0.354197	yellow|0.6557
YARS2|NP_001035526.1	M4	yellow	-0.140981	-0.111103	-0.573117	-0.635369	-0.64302	-0.336122	0.0512793	-0.184555	-0.146991	0.0872544	-0.189675	0.558972	0.339285	0.347116	0.47821	0.287417	0.388626	0.44898	0.363792	0.509864	0.544952	0.430499	0.637699	-0.0765134	-0.0479691	0.0501182	0.238011	-0.132741	yellow|0.6377
WFS1|NP_001139325.1	M4	yellow	0.141679	0.239599	-0.516525	-0.264333	-0.538279	-0.323298	-0.117219	-0.559938	-0.495154	-0.396404	-0.0487518	0.400818	0.621923	0.194255	0.402313	0.252057	0.116837	0.238343	-0.0198666	0.24538	0.392009	0.535325	0.634886	-0.440435	-0.268086	-0.178745	-0.0312571	-0.144044	yellow|0.6349
SV2A|NP_055664.3	M4	yellow	-0.269761	-0.478049	-0.228271	-0.79609	-0.573336	-0.125866	-0.17258	-0.237605	-0.485119	-0.357136	-0.646979	0.658926	0.0918709	-0.15643	0.150824	-0.152727	-0.0489375	0.191507	0.0311085	0.658353	0.223274	0.335675	0.626467	0.169919	-0.037666	0.427879	0.408106	0.0767046	yellow|0.6265
ATAD3A|NP_001164007.1	M4	yellow	0.191367	-0.327605	-0.680719	-0.511482	-0.511989	0.276176	0.112828	-0.289219	-0.057866	0.0972755	-0.0455126	0.579234	0.300965	0.178803	0.429915	0.48872	0.622219	0.574729	0.247954	0.556067	0.491346	0.493848	0.624144	-0.0619491	-0.397983	-0.118205	0.152662	0.296398	yellow|0.6241
CXADR|NP_001329.1	M4	yellow	-0.0255639	-0.240656	-0.445478	-0.449059	-0.359526	0.0164872	-0.529383	-0.604429	-0.182873	-0.0992376	0.0363227	0.476087	0.518824	0.237434	0.451222	-0.0797561	0.308005	0.621793	0.372752	0.265674	0.19468	0.483187	0.610332	0.129823	0.018358	-0.337167	-0.0673938	0.372241	yellow|0.6103
FAM162A|NP_055182.3	M4	yellow	0.180415	-0.242529	-0.277918	-0.658638	-0.643919	-0.26008	-0.222207	-0.462309	-0.53016	0.00659425	-0.216729	0.49431	0.404222	0.35016	0.171696	0.0651466	0.176841	0.228808	0.283607	0.554985	0.258069	0.563457	0.607443	-0.00755615	0.26815	0.245811	-0.0236034	-0.017156	yellow|0.6074
C1orf95|NP_001003665.1	M4	yellow	0.0781693	0.033703	-0.846254	-0.30174	-0.486798	-0.0777466	0.294327	-0.316982	-0.0383079	-0.245911	-0.15273	0.515612	0.535484	0.123797	0.680312	0.482822	0.501074	0.374276	-0.0507599	0.320941	0.52171	0.409342	0.606596	-0.333263	-0.561602	-0.142114	0.174438	-0.0901579	yellow|0.6066
CADM2|NP_694854.2	M4	yellow	0.0733218	-0.104651	-0.680069	-0.300258	-0.616753	-0.0935519	0.298413	-0.487305	-0.240029	0.00368551	-0.0614705	0.346052	0.509454	0.300206	0.60725	0.504731	0.509944	0.328282	0.150078	0.521603	0.47475	0.570252	0.585867	-0.429051	-0.346147	0.0249475	0.323895	-0.161722	yellow|0.5859
SRPRB|NP_067026.3	M4	yellow	-0.245639	-0.572966	-0.544795	-0.576971	-0.687122	-0.284119	0.258165	-0.205009	-0.164615	0.318068	0.0604278	0.290556	0.196464	0.378519	0.431535	0.499871	0.470873	0.576551	0.566825	0.532278	0.527057	0.515104	0.57306	0.251347	-0.014236	0.0537431	0.432161	0.062658	yellow|0.5731
PGP|NP_001035830.1	M4	yellow	-0.298483	-0.534648	-0.339547	-0.456177	-0.342624	-0.0450448	-0.36792	-0.429273	-0.353884	-0.227209	-0.0233304	0.235221	0.186804	-0.0157815	0.31557	0.0400137	0.0360445	0.499014	0.152529	0.310407	0.0715424	0.40016	0.572926	0.0878394	-0.262727	-0.201098	0.308467	0.264617	yellow|0.5729
STX6|NP_005810.1	M4	yellow	0.332954	-9.61e-06	-0.639234	-0.210229	-0.426109	0.00723991	0.133474	-0.318196	-0.19219	-0.413738	-0.289911	0.467814	0.48061	0.0506266	0.349482	0.334367	0.240941	0.182134	-0.299433	0.436328	0.445349	0.447899	0.562854	-0.46292	-0.401104	0.0881289	0.159116	-0.283343	yellow|0.5629
CPD|NP_001295.2	M4	yellow	-0.00553127	-0.162768	-0.0256036	-0.195183	-0.405227	-0.36886	-0.329709	-0.376906	-0.567456	-0.351844	0.0897827	0.0854693	0.185509	0.0178687	-0.0362071	-0.0837775	-0.273422	0.131337	0.0251146	0.437227	0.05017	0.437073	0.537037	0.00397796	0.0409751	-0.0959492	0.110605	-0.113434	yellow|0.537
SLC14A1|NP_001139508.2	M4	yellow	0.0568407	-0.206302	-0.0586901	-0.313333	-0.50335	-0.24467	-0.222782	-0.531644	-0.720408	-0.302024	-0.0408138	0.163958	0.246615	0.0454338	0.0471471	0.0198284	-0.138079	0.0232766	-0.00834531	0.549404	0.0515871	0.498303	0.530774	-0.181462	-0.0115821	0.0788367	0.148482	-0.0662547	yellow|0.5308
CAMK4|NP_001735.1	M4	yellow	0.0713843	-0.322372	-0.576096	-0.0683981	-0.520204	-0.122621	0.328411	-0.381453	-0.181492	-0.0784314	0.0771161	0.103276	0.332178	0.2174	0.390414	0.5125	0.337682	0.336763	0.0476138	0.604629	0.507023	0.576872	0.515087	-0.348532	-0.281364	0.0407607	0.541257	-0.293469	yellow|0.5151
DIRAS1|NP_660156.1	M4	yellow	-0.0593413	-0.247142	-0.750772	-0.358521	-0.391517	0.097333	0.200046	-0.205157	-0.0592354	-0.282681	-0.221917	0.431484	0.398473	0.0118421	0.564731	0.480259	0.377625	0.363544	-0.153817	0.301137	0.438067	0.306323	0.50633	-0.190506	-0.571065	-0.0836306	0.218413	-0.0797371	yellow|0.5063
NDUFA13|NP_057049.5	M4	yellow	-0.216359	-0.626704	-0.223299	-0.177862	-0.382661	-0.131586	-0.327156	-0.373401	-0.285024	-0.0588262	0.294163	1.05e-05	0.151405	0.16209	0.123416	0.16036	0.0264599	0.583696	0.346996	0.428669	0.296111	0.50723	0.502429	0.217049	0.0462233	-0.257603	0.401767	0.100554	yellow|0.5024
IQSEC1|NP_001127854.1	M4	yellow	-0.0217142	-0.150041	-0.297651	-0.184637	-0.372079	-0.0155213	0.0383505	-0.163638	0.0225646	-0.00592423	0.0883155	0.324939	0.106006	0.0617405	0.151293	0.0990355	0.230935	0.479725	0.294931	0.498483	0.410815	0.365113	0.498307	0.186288	-0.096401	-0.170155	0.277268	0.12506	yellow|0.4983
DNAJC5|NP_079495.1	M4	yellow	-0.150331	0.0228483	-0.234113	-0.608664	-0.294707	-0.192684	-0.586349	-0.413892	-0.281244	-0.16125	-0.0723192	0.545157	0.412997	0.143424	0.339004	-0.242308	0.115031	0.376998	0.332603	0.0395754	0.0342431	0.226462	0.481349	0.280612	0.112971	-0.316468	-0.375236	0.423864	yellow|0.4813
ATL1|NP_056999.2	M4	yellow	-0.282437	0.129229	-0.222599	-0.181232	-0.412894	-0.519511	-0.0271875	-0.283847	-0.230333	-0.289225	-0.0971874	0.198725	0.415003	0.083438	0.527033	-0.00946196	0.0159946	0.0798334	-0.0231037	0.133384	0.136868	0.219364	0.480755	0.0721792	-0.0730395	-0.21415	0.209408	-0.212411	yellow|0.4808
TMEM65|NP_919267.2	M4	yellow	-0.246581	0.0714325	-0.285978	-0.13027	-0.293608	-0.377823	0.0450612	-0.0258956	-0.0169904	-0.141154	0.013228	0.104076	0.287575	0.0630677	0.431723	0.109578	0.0107485	0.201931	0.0027996	-0.0463485	0.0889332	0.119528	0.428697	0.220735	-0.229955	-0.327255	0.0851131	-0.203205	yellow|0.4287
KIF2A|NP_001230882.1	M4	yellow	-0.033523	0.0362203	-0.369558	-0.436373	-0.306973	0.088179	-0.0701413	0.0299273	-0.0218866	0.0628441	-0.0970589	0.40094	0.157298	0.132548	0.160695	0.176018	0.163955	0.371293	0.17358	0.275173	0.264376	0.196792	0.420656	-0.0281388	-0.244409	-0.112441	-0.123636	-0.084869	yellow|0.4207
STK3|NP_006272.2	M4	yellow	-0.184423	-0.222932	-0.343845	-0.492272	-0.592563	-0.59879	0.2291	-0.104679	-0.15006	0.231836	-0.111272	0.273698	0.297265	0.418328	0.417151	0.295723	0.304545	0.226378	0.391703	0.177724	0.411854	0.297214	0.397888	0.298167	0.279431	0.144325	0.210434	-0.125356	yellow|0.3979
IQGAP1|NP_003861.1	M4	yellow	-0.00297314	-0.391268	-0.124571	-0.477083	-0.395663	-0.0277389	0.0505473	-0.105069	-0.234519	0.195277	-0.126027	0.316867	-0.161508	0.059812	-0.0879871	0.108138	0.148391	0.32513	0.380387	0.454568	0.240812	0.343356	0.367182	0.118739	0.0103703	0.262706	0.351363	0.309746	yellow|0.3672
ALDH4A1|NP_733844.1	M4	yellow	-0.172048	-0.189726	-0.0646752	-0.173065	-0.344326	-0.173954	-0.165337	-0.319975	-0.563028	-0.584154	-0.34925	0.208669	0.155736	-0.208283	-0.02764	-0.0400058	-0.324591	0.0325209	-0.224839	0.269039	0.251295	0.310299	0.359456	-0.151473	-0.108436	0.21739	0.420462	-0.113519	yellow|0.3595
IPO4|NP_078934.3	M4	yellow	-0.10068	0.179382	-0.0974875	-0.194775	-0.120003	-0.0658114	-0.598586	-0.502929	-0.148226	-0.143396	0.169841	0.302848	0.388897	0.117768	0.297539	-0.316351	0.0975375	0.368664	0.320034	0.0111894	-0.0137236	0.222544	0.349957	0.127774	0.0964314	-0.502441	-0.269196	0.409386	yellow|0.35
STXBP5|NP_001121187.1	M4	yellow	0.360396	-0.217409	-0.311999	-0.323149	-0.371827	0.326799	0.172317	-0.179633	0.017384	0.42388	0.0968466	0.381377	0.0937316	0.290223	0.0144681	0.346512	0.536565	0.449511	0.465585	0.475171	0.432826	0.418108	0.314063	0.0809266	0.0281537	0.0619207	0.00467625	0.336977	yellow|0.3141
HOMER1|NP_004263.1	M4	yellow	0.191328	0.21091	-0.0683694	-0.104596	-0.182122	0.0157809	-0.284523	-0.232104	-0.106584	-0.0401117	-0.0293019	0.182588	0.450265	0.173982	0.293728	-0.12403	0.0843097	-0.00689473	-0.0361431	0.0836428	-0.165135	0.154113	0.310145	0.0533278	0.050564	-0.231052	-0.351751	-0.142552	yellow|0.3101
XRCC6|NP_001460.1	M4	yellow	-0.249852	-0.156097	0.0695979	-0.418267	-0.415627	-0.524244	-0.0391072	-0.0242843	-0.199151	0.0165898	-0.230043	0.2369	0.081967	0.169452	0.0814567	-0.147623	-0.0737055	0.0219635	0.202349	0.317664	0.178462	0.125433	0.309399	0.401897	0.447177	0.212768	0.192572	-0.221222	yellow|0.3094
G3BP2|NP_987101.1	M4	yellow	0.167075	0.15367	-0.0811103	-0.0689888	-0.14003	0.243761	-0.0936349	-0.270044	-0.101932	-0.0650291	0.0488876	0.284383	0.0333857	-0.0648915	0.00859893	-0.0416191	0.15906	0.185112	0.105199	0.402015	0.142448	0.232989	0.269895	-0.246949	-0.208664	-0.13354	0.061772	0.254332	yellow|0.2699
PRPF19|NP_055317.1	M27	white	0.18303	-0.130324	-0.167425	0.000422647	-0.294812	0.0307811	0.84382	0.315504	0.278758	0.414017	-0.198312	0.0128421	-0.0518829	0.161529	0.190863	0.464846	0.404735	-0.158296	-0.0688264	0.360963	0.246568	0.0465332	0.0481372	0.0632965	-0.0612581	0.402847	0.40955	-0.424184	white|0.8438
AKR1B1|NP_001619.1	M27	white	0.389702	-0.135747	-0.324035	0.204813	-0.158377	0.285427	0.824218	0.230721	0.292903	0.349167	0.10878	-0.0734857	-0.0382908	0.133272	0.0710994	0.731226	0.486443	0.0102012	-0.0784929	0.233222	0.401721	0.112571	-0.0396647	-0.128712	-0.290895	0.160213	0.237403	-0.203033	white|0.8242
ASNA1|NP_004308.2	M27	white	0.122771	-0.0828006	-0.0481265	0.175678	0.00725362	0.166855	0.815944	0.550516	0.406094	0.357927	0.0302363	-0.135662	-0.387699	-0.0552984	-0.0902722	0.502903	0.278359	-0.141167	-0.10445	0.165726	0.238309	-0.184892	-0.206752	0.0559369	-0.230304	0.206578	0.31566	-0.183643	white|0.8159
AGPAT5|NP_060831.2	M27	white	0.0265407	0.0915311	-0.251531	-0.211727	-0.199744	0.225889	0.80636	0.443527	0.434193	0.362338	-0.397139	0.363148	-0.175002	-0.013471	0.201577	0.380882	0.48982	-0.0269653	-0.00290476	0.248171	0.388066	-0.143406	0.011979	0.0373216	-0.271419	0.346388	0.324234	-0.106446	white|0.8064
GFAP|NP_002046.1	M27	white	0.163083	0.0876912	-0.377873	0.00616433	-0.112835	0.171238	0.790927	0.334186	0.368315	0.281634	-0.247166	0.142715	-0.0817682	0.0599634	0.174726	0.521035	0.429988	-0.0276709	-0.0930656	0.107202	0.384072	-0.0413778	-0.0618401	-0.309246	-0.357735	0.341978	0.312429	-0.25424	white|0.7909
AKR1C1|NP_001344.2	M27	white	0.367308	0.242996	0.12246	0.369282	0.0745598	0.088379	0.751714	0.397583	0.255334	0.236626	-0.200219	-0.21418	-0.124188	0.0157987	-0.153438	0.242468	0.0875081	-0.552759	-0.319906	-0.0150297	0.0119227	-0.209996	-0.377008	-0.200155	0.0421249	0.510313	0.0557074	-0.527596	white|0.7517
TMEM43|NP_077310.1	M27	white	0.470552	-0.0272561	-0.43809	-0.0850328	-0.293185	0.285185	0.737301	0.240703	0.326523	0.4688	-0.0249702	0.234393	0.0219937	0.255271	0.129603	0.710802	0.625689	0.164312	0.0677275	0.32726	0.518055	0.18559	0.14627	-0.13673	-0.261865	0.175221	0.151225	-0.136763	white|0.7373
DNAJC19|NP_660304.1	M27	white	0.0853876	0.136043	-0.0464086	0.346989	0.241632	0.170678	0.733084	0.54366	0.658728	0.367624	-0.0409153	-0.233331	-0.278777	-0.04006	0.10279	0.244199	0.268767	-0.251915	-0.210587	-0.0683984	-0.0457718	-0.357992	-0.333806	-0.0928502	-0.238324	0.157479	0.221459	-0.358229	white|0.7331
KCNAB2|NP_001186789.1	M27	white	0.153389	0.160981	0.0726137	0.339178	0.189639	0.0530133	0.712533	0.561816	0.628737	0.480332	-0.0859661	-0.253507	-0.140391	0.138635	0.0838562	0.241916	0.275333	-0.347997	-0.153471	-0.222358	-0.0070244	-0.367979	-0.430895	0.123075	0.120611	0.251102	0.085035	-0.42781	white|0.7125
CDK5|NP_004926.1	M27	white	0.147539	0.0301864	0.0289018	-0.00726288	-0.141827	-0.0170747	0.698715	0.263077	0.0819185	0.171114	-0.413364	0.0436529	-0.166547	-0.0292475	0.0052927	0.189717	0.164321	-0.452863	-0.228799	0.287234	0.0901011	-0.0971226	-0.145661	-0.210708	0.000342109	0.645028	0.346436	-0.376819	white|0.6987
GPD2|NP_000399.3	M27	white	0.125214	0.112697	-0.0884976	0.038193	-0.0858005	0.274246	0.680329	0.380031	0.358802	0.436769	-0.133832	0.00116647	-0.105487	0.028356	0.191672	0.344855	0.3471	-0.159328	-0.0825244	0.0832787	-0.0124053	-0.146546	-0.0391543	0.0478866	-0.310658	0.134397	0.112678	-0.219919	white|0.6803
RAB23|NP_057361.3	M27	white	0.330134	-0.198603	-0.0600771	0.291461	0.105664	0.4513	0.673063	0.409349	0.367237	0.374971	0.0196035	-0.206046	-0.253752	0.0387884	-0.176579	0.530224	0.31884	-0.167325	-0.150545	0.139236	0.244259	-0.111865	-0.363782	-0.128379	-0.0923972	0.337366	0.186998	-0.215746	white|0.6731
NSF|NP_006169.2	M27	white	0.565425	-0.132325	-0.255525	0.207187	-0.126842	0.342782	0.673092	0.0702955	0.188691	0.29864	0.00417594	-0.0156908	0.0314216	0.209807	-0.137937	0.597289	0.415436	-0.0278635	-0.0673125	0.266891	0.484743	0.193587	-0.131758	-0.273166	-0.00877153	0.395071	0.146358	-0.236644	white|0.6731
GNAZ|NP_002064.1	M27	white	-0.0478189	-0.0158746	-0.22534	-0.159343	0.107765	0.439887	0.643378	0.565654	0.69242	0.438374	-0.342557	0.240824	-0.294382	-0.139308	0.288456	0.209564	0.496744	0.00525858	-0.0500453	-0.0101946	-0.0111039	-0.36102	-0.110596	0.174966	-0.436256	0.156458	0.199448	0.102222	white|0.6434
ATP1B1|NP_001668.1	M27	white	-0.102528	-0.0816761	-0.0828764	-0.326728	-0.220341	-0.0879068	0.618584	0.478241	0.286525	0.266812	-0.540355	0.2461	-0.199442	-0.0466364	0.231321	0.0906464	0.224003	-0.241232	-0.123487	0.275063	0.00382201	-0.191042	0.0920295	0.204044	-0.0913103	0.485015	0.359489	-0.318935	white|0.6186
SYNPR|NP_001123475.1	M27	white	-0.185123	-0.0203785	-0.17829	-0.175657	-0.193531	-0.100604	0.616519	0.316989	0.329267	0.376149	-0.240487	0.139077	-0.0866209	0.102447	0.25697	0.286791	0.317738	0.0415135	0.139151	-0.0499961	0.258853	-0.125734	0.00970716	0.232982	-0.0776639	0.209125	0.312885	-0.111849	white|0.6165
GJA1|NP_000156.1	M27	white	0.404246	-0.322014	-0.33742	0.0417251	-0.223788	0.0969667	0.593552	0.125267	0.14747	0.0677327	-0.080878	0.065768	-0.0321109	0.0524776	0.0237833	0.51415	0.321043	0.0195685	-0.211989	0.436851	0.375808	0.218585	0.156551	-0.135926	-0.186907	0.301229	0.39172	-0.259025	white|0.5936
ERO1L|NP_055399.1	M27	white	0.590668	0.379996	-0.206571	0.205492	-0.0265618	0.289351	0.569653	0.278527	0.373113	0.519575	0.247842	-0.0473091	0.115338	0.388044	0.0356657	0.61319	0.513386	-0.120545	-0.0365144	0.127322	0.285411	-0.0129139	-0.166514	-0.331176	-0.0714511	-0.0271948	-0.356829	-0.39657	white|0.5697
ATAD3C|NP_001034300.2	M27	white	0.196585	0.212755	-0.190698	0.290288	-0.000907201	0.24694	0.497906	0.235873	0.33039	0.265544	0.349614	-0.110245	-0.00793022	0.143329	0.0299446	0.538337	0.350932	0.0660915	0.0181892	0.131701	0.379509	-0.024453	-0.126051	-0.143833	-0.217458	-0.213991	-0.0798746	-0.204613	white|0.4979
RPL23|NP_000969.1	M27	white	0.215443	0.203725	-0.161407	0.125012	0.126086	0.271683	0.475999	0.312528	0.496905	0.523771	0.293151	-0.111438	-0.0512099	0.233224	0.220644	0.43015	0.528712	-0.0757905	0.0314934	0.0621703	0.0285474	-0.200706	-0.223852	-0.128327	-0.172329	-0.188124	-0.248143	-0.138545	white|0.476
GRM3|NP_000831.2	M27	white	-0.240945	0.133879	-0.0874634	-0.0963691	0.0577282	0.124745	0.387551	0.474715	0.488393	0.276076	-0.164743	0.0838301	-0.171008	-0.093791	0.363279	0.136559	0.25933	-0.0293122	-0.096979	-0.11403	-0.10153	-0.344758	-0.00743516	0.211278	-0.381172	-0.149763	0.14697	-0.0573946	white|0.3876
MDH1|NP_001186040.1	M1	turquoise	0.0587518	0.368418	0.654011	0.695581	0.964605	0.417839	-0.0747322	0.533426	0.418932	-0.17728	0.0422236	-0.561195	-0.568435	-0.572162	-0.509222	-0.485366	-0.506354	-0.664432	-0.621978	-0.665602	-0.788897	-0.807306	-0.840571	-0.0829152	-0.155303	-0.0686853	-0.354497	0.0322248	turquoise|0.9646
TPI1|NP_001152759.1	M1	turquoise	-0.0698378	0.295707	0.669241	0.555123	0.963656	0.37591	-0.139695	0.59795	0.434981	-0.160574	-0.0343715	-0.504265	-0.642264	-0.609388	-0.490336	-0.578448	-0.539602	-0.6297	-0.574137	-0.661317	-0.858199	-0.858846	-0.804916	0.0275956	-0.148383	-0.0469852	-0.327508	0.0857678	turquoise|0.9637
LDHB|NP_001167568.1	M1	turquoise	0.0947015	0.479479	0.646141	0.682056	0.956928	0.402328	-0.0110751	0.643559	0.542959	-0.00256795	0.0838204	-0.543474	-0.570387	-0.465474	-0.482853	-0.42538	-0.414129	-0.631215	-0.531355	-0.72605	-0.744172	-0.845399	-0.85854	-0.0340011	-0.112781	-0.119026	-0.425292	0.00638212	turquoise|0.9569
CUTA|NP_001014433.1	M1	turquoise	-0.0237233	0.261836	0.591265	0.499234	0.952415	0.486483	-1.03e-05	0.686773	0.539521	-0.0483844	-0.0893108	-0.433843	-0.667208	-0.581909	-0.461162	-0.448539	-0.396965	-0.598805	-0.556149	-0.662027	-0.766329	-0.888022	-0.84002	0.0462111	-0.193472	0.0119257	-0.316831	0.123193	turquoise|0.9524
PEBP1|NP_002558.1	M1	turquoise	0.0406584	0.354298	0.65724	0.634061	0.942795	0.411883	-0.31936	0.389899	0.308328	-0.202586	0.0980238	-0.517659	-0.49858	-0.507959	-0.571523	-0.563229	-0.566612	-0.508439	-0.481697	-0.699521	-0.744845	-0.701996	-0.781346	-0.0853539	-0.0583723	-0.136759	-0.427298	0.138765	turquoise|0.9428
PRDX6|NP_004896.1	M1	turquoise	0.00861777	0.344395	0.5606	0.759937	0.937075	0.402179	-0.0524856	0.477386	0.460736	-0.170481	0.125841	-0.589539	-0.495598	-0.516465	-0.424179	-0.395768	-0.439679	-0.543604	-0.558436	-0.689003	-0.665311	-0.746154	-0.816886	-0.0949302	-0.177745	-0.157097	-0.274008	0.0300453	turquoise|0.9371
TAGLN2|NP_003555.1	M1	turquoise	-0.054508	0.251228	0.740413	0.646056	0.933209	0.302043	-0.0805532	0.577009	0.395859	-0.125642	0.00586132	-0.608028	-0.597806	-0.531889	-0.524689	-0.510712	-0.554003	-0.685001	-0.568016	-0.711196	-0.78557	-0.836942	-0.880969	0.0963969	0.0166007	0.00318638	-0.283875	0.0127076	turquoise|0.9332
DDAH2|NP_039268.1	M1	turquoise	0.134352	0.502502	0.732416	0.727549	0.933011	0.342709	0.0414786	0.64969	0.471629	-0.0242155	-0.0103682	-0.593721	-0.54442	-0.448711	-0.541211	-0.456917	-0.4936	-0.789393	-0.607743	-0.717927	-0.766565	-0.853803	-0.919035	-0.0677358	0.00737462	0.0482641	-0.413398	-0.157032	turquoise|0.933
PRDX1|NP_001189360.1	M1	turquoise	0.119724	0.472329	0.652751	0.713164	0.93183	0.31158	-0.160716	0.474788	0.357634	-0.210703	0.0821659	-0.57003	-0.444314	-0.490648	-0.488596	-0.507659	-0.548065	-0.684817	-0.62724	-0.719329	-0.80196	-0.763896	-0.797665	-0.10507	-0.0805429	-0.127336	-0.479792	-0.0539347	turquoise|0.9318
HDHD2|NP_115500.1	M1	turquoise	0.0489597	0.356323	0.776188	0.596379	0.931338	0.277991	-0.109089	0.583918	0.323074	-0.142963	-0.0858371	-0.560126	-0.650019	-0.548467	-0.619383	-0.599523	-0.623543	-0.783294	-0.611962	-0.620135	-0.863398	-0.820607	-0.85967	-0.102236	0.00518943	0.142408	-0.317178	-0.0654917	turquoise|0.9313
CALM1|NP_008819.1	M1	turquoise	-0.0787157	0.446473	0.496088	0.433395	0.93097	0.434196	-0.113075	0.557374	0.451394	-0.245644	-0.232344	-0.250931	-0.566924	-0.644576	-0.403206	-0.545521	-0.441537	-0.541148	-0.566399	-0.740872	-0.676229	-0.85024	-0.768189	-0.144098	-0.287785	0.0155805	-0.309828	0.201437	turquoise|0.931
LDHC|NP_002292.1	M1	turquoise	0.000609767	0.357022	0.546608	0.525416	0.930322	0.45163	0.197968	0.809694	0.660335	0.0359911	-0.12928	-0.400472	-0.710485	-0.550703	-0.468325	-0.372926	-0.3255	-0.613245	-0.530086	-0.645055	-0.641377	-0.92191	-0.87785	0.0156135	-0.194543	0.097901	-0.261296	0.0321583	turquoise|0.9303
CRMP1|NP_001304.1	M1	turquoise	0.114483	0.443162	0.574703	0.618801	0.929099	0.493331	-0.107667	0.487712	0.349657	-0.326185	-0.0835491	-0.391555	-0.554513	-0.657654	-0.526758	-0.504728	-0.509497	-0.66014	-0.702198	-0.542995	-0.711552	-0.763183	-0.761215	-0.266205	-0.280119	-0.00774367	-0.345763	0.0509036	turquoise|0.9291
GLO1|NP_006699.2	M1	turquoise	-0.116103	0.422948	0.64985	0.539565	0.925023	0.177596	-0.311367	0.533547	0.3735	-0.175363	0.0542642	-0.508486	-0.518813	-0.482082	-0.458149	-0.604376	-0.604486	-0.530176	-0.467854	-0.804083	-0.803285	-0.801292	-0.743847	0.0204316	-0.0481444	-0.185375	-0.423102	0.0499894	turquoise|0.925
ETFA|NP_000117.1	M1	turquoise	0.0939959	0.384121	0.56366	0.529606	0.922558	0.525866	0.141842	0.741821	0.631611	0.0916084	-0.149494	-0.400058	-0.681423	-0.519883	-0.454091	-0.413871	-0.307212	-0.627167	-0.530399	-0.607641	-0.734159	-0.867297	-0.834983	-0.0930229	-0.219473	0.116669	-0.262282	0.0266264	turquoise|0.9226
UBE2V1|NP_071887.1	M1	turquoise	-0.0833195	0.39122	0.576885	0.467762	0.919826	0.28583	-0.266651	0.486544	0.475327	-0.169422	-0.0699696	-0.312581	-0.507124	-0.510567	-0.430651	-0.669028	-0.455257	-0.455676	-0.382877	-0.737288	-0.68257	-0.79357	-0.752699	0.0793026	0.0108783	-0.077595	-0.384387	0.228978	turquoise|0.9198
CFL1|NP_005498.1	M1	turquoise	-0.0907446	0.319904	0.723283	0.608684	0.916394	0.239521	-0.192001	0.545861	0.417915	-0.0359354	0.177777	-0.578937	-0.611675	-0.445996	-0.552437	-0.543765	-0.520106	-0.520344	-0.343047	-0.676512	-0.722158	-0.783918	-0.830033	0.121901	0.077633	-0.142135	-0.367686	0.11384	turquoise|0.9164
ACOT7|NP_009205.3	M1	turquoise	-0.116502	0.342991	0.583358	0.431322	0.911345	0.329283	0.042986	0.792679	0.661079	0.111909	-0.0889988	-0.39688	-0.645051	-0.447845	-0.39872	-0.453632	-0.336639	-0.539316	-0.391599	-0.756287	-0.68723	-0.938458	-0.85397	0.198583	-0.0380925	-0.000457149	-0.351563	0.0745031	turquoise|0.9113
CRYM|NP_001879.1	M1	turquoise	-0.0900188	0.396455	0.538103	0.449345	0.906272	0.558305	-0.113263	0.505651	0.526152	-0.0483638	-0.0746043	-0.279782	-0.526764	-0.559878	-0.327157	-0.533403	-0.289483	-0.461432	-0.38543	-0.694027	-0.711428	-0.83287	-0.76758	0.0651004	-0.208415	-0.128675	-0.39354	0.335915	turquoise|0.9063
IDH3A|NP_005521.1	M1	turquoise	-0.109065	0.500329	0.613137	0.487336	0.904649	0.206052	-0.284894	0.425769	0.330194	-0.234899	-0.0292576	-0.391273	-0.449315	-0.514635	-0.397482	-0.662382	-0.540313	-0.573555	-0.455951	-0.779298	-0.795821	-0.797159	-0.750876	-0.029475	-0.0537655	-0.123846	-0.482198	0.144246	turquoise|0.9046
IMPA1|NP_001138350.1	M1	turquoise	-0.19581	0.300211	0.609004	0.36945	0.900869	0.299656	-0.308017	0.559434	0.437479	-0.160703	-0.0960639	-0.315782	-0.657471	-0.5826	-0.495549	-0.69591	-0.54608	-0.39542	-0.371967	-0.641004	-0.730885	-0.791571	-0.676882	0.0803888	-0.0949916	-0.0686838	-0.261179	0.229423	turquoise|0.9009
NME1-NME2|NP_001018146.1	M1	turquoise	0.0344405	0.505906	0.466494	0.498843	0.899998	0.482978	-0.123475	0.577821	0.504777	-0.111202	-0.0336889	-0.372313	-0.430493	-0.462929	-0.315977	-0.398998	-0.363902	-0.541205	-0.60595	-0.663028	-0.717851	-0.810264	-0.717468	-0.163844	-0.285941	-0.181235	-0.493705	-0.0501391	turquoise|0.9
DBI|NP_001171488.1	M1	turquoise	-0.0712377	0.24306	0.79393	0.595544	0.899097	0.30778	-0.0335863	0.541641	0.344402	-0.0161353	-0.0306886	-0.594318	-0.708281	-0.522287	-0.588186	-0.557356	-0.53135	-0.700603	-0.445603	-0.586749	-0.794543	-0.795934	-0.899785	-0.0247964	0.0488628	0.158423	-0.164701	0.0668292	turquoise|0.8991
PARK7|NP_009193.2	M1	turquoise	0.179714	0.393785	0.617877	0.683965	0.897576	0.575683	-0.0697902	0.506819	0.483293	0.138813	0.182009	-0.542675	-0.486692	-0.319498	-0.556925	-0.312382	-0.31631	-0.474233	-0.345411	-0.681697	-0.588985	-0.698009	-0.875998	-0.0610749	-0.00268301	-0.106272	-0.471523	0.083143	turquoise|0.8976
GOT1|NP_002070.1	M1	turquoise	-0.185452	0.353758	0.577597	0.405427	0.897321	0.4097	-0.104298	0.559365	0.456912	-0.181639	-0.18598	-0.321464	-0.63248	-0.659612	-0.306436	-0.598008	-0.423308	-0.594491	-0.57363	-0.560769	-0.821107	-0.868912	-0.705882	-0.0729923	-0.301253	-0.0400931	-0.195136	0.152892	turquoise|0.8973
NCALD|NP_001035717.1	M1	turquoise	-0.0469665	0.213225	0.535072	0.376352	0.895653	0.62911	-0.0611388	0.629993	0.60924	-0.011054	-0.166934	-0.22593	-0.649636	-0.58937	-0.419378	-0.52412	-0.269071	-0.435273	-0.415272	-0.52616	-0.655246	-0.835564	-0.749897	0.148355	-0.162956	0.0136854	-0.272813	0.296895	turquoise|0.8957
PRDX1|	M1	turquoise	0.0578738	0.54749	0.654192	0.680855	0.894787	0.29312	-0.0590505	0.500123	0.358522	-0.235731	-0.00493278	-0.496878	-0.457048	-0.541675	-0.428243	-0.494824	-0.51052	-0.74193	-0.651732	-0.706715	-0.755905	-0.809329	-0.802194	-0.111351	-0.130105	-0.0914549	-0.4184	-0.0315034	turquoise|0.8948
BLVRA|NP_000703.2	M1	turquoise	0.167458	0.37763	0.703282	0.696055	0.893087	0.430496	-0.161344	0.373362	0.359871	-0.0211742	0.112627	-0.546871	-0.45302	-0.388813	-0.536303	-0.50988	-0.417576	-0.609716	-0.418466	-0.633744	-0.724348	-0.68205	-0.848433	-0.0645006	0.0968829	-0.0334838	-0.429492	0.0947592	turquoise|0.8931
GSTP1|NP_000843.1	M1	turquoise	0.121032	0.314853	0.436641	0.627393	0.890564	0.388248	-0.142833	0.456115	0.543111	-0.029825	0.0751202	-0.464666	-0.377372	-0.334149	-0.364846	-0.36706	-0.314961	-0.377721	-0.430804	-0.782894	-0.5797	-0.666504	-0.745077	-0.0485083	-0.0568893	-0.142382	-0.344934	0.0719039	turquoise|0.8906
HPCA|NP_002134.2	M1	turquoise	-0.109292	0.170779	0.519224	0.346755	0.890214	0.620591	-0.0739418	0.621594	0.570676	-0.0612738	-0.163611	-0.235576	-0.674279	-0.635435	-0.389932	-0.513043	-0.292429	-0.428814	-0.450561	-0.499191	-0.685158	-0.83584	-0.717446	0.130383	-0.244759	-0.017396	-0.22864	0.310491	turquoise|0.8902
VSNL1|NP_003376.2	M1	turquoise	-0.183405	0.226533	0.634085	0.316119	0.887312	0.29739	-0.0736063	0.720428	0.514277	-0.0477068	-0.181526	-0.316606	-0.786361	-0.591301	-0.50552	-0.612546	-0.457081	-0.54044	-0.416268	-0.523354	-0.725211	-0.883393	-0.765328	0.108549	-0.064932	0.117846	-0.186129	0.154147	turquoise|0.8873
HPCAL1|NP_002140.2	M1	turquoise	-0.0952322	0.167163	0.513448	0.342181	0.883863	0.61687	-0.0849927	0.609913	0.592991	-0.0333179	-0.154708	-0.218074	-0.652714	-0.604022	-0.394379	-0.52326	-0.271372	-0.394473	-0.403114	-0.513972	-0.657871	-0.823535	-0.716843	0.175457	-0.191903	-0.0192813	-0.249658	0.331281	turquoise|0.8839
RAN|NP_006316.1	M1	turquoise	-0.0843429	0.142747	0.652867	0.407421	0.881616	0.432638	-0.15713	0.518288	0.35228	-0.0660562	-0.111728	-0.363531	-0.728777	-0.551719	-0.668333	-0.546677	-0.483515	-0.445011	-0.319451	-0.580058	-0.590519	-0.73273	-0.834038	0.0124265	0.018313	0.179892	-0.179071	0.29962	turquoise|0.8816
PCMT1|NP_005380.2	M1	turquoise	-0.0706499	0.384295	0.701947	0.421609	0.875966	0.35893	-0.226566	0.565546	0.35487	-0.178542	-0.177969	-0.301387	-0.586533	-0.570829	-0.571323	-0.62132	-0.551803	-0.561628	-0.466299	-0.716149	-0.663941	-0.822997	-0.784854	0.0984498	0.0093386	0.0378636	-0.364378	0.19321	turquoise|0.876
DDAH1|NP_036269.1	M1	turquoise	0.213634	0.410682	0.782379	0.719694	0.875945	0.421329	0.101704	0.595481	0.401748	0.0207051	-0.0342445	-0.575473	-0.579704	-0.436574	-0.633995	-0.421805	-0.451795	-0.817537	-0.570813	-0.569902	-0.693389	-0.784184	-0.942205	-0.0812195	0.0967544	0.189936	-0.340859	-0.119101	turquoise|0.8759
ALB|	M1	turquoise	-0.0495209	0.357348	0.612081	0.391242	0.875836	0.438887	-0.118301	0.523244	0.317953	-0.248593	-0.226985	-0.238545	-0.639545	-0.695818	-0.539272	-0.582522	-0.496242	-0.579832	-0.509162	-0.667579	-0.691901	-0.812047	-0.763114	-0.00986785	-0.198697	0.0898673	-0.313628	0.335796	turquoise|0.8758
ALB|NP_000468.1	M1	turquoise	-0.0496354	0.355676	0.612016	0.385233	0.875616	0.447176	-0.1208	0.526406	0.325235	-0.235223	-0.226192	-0.232985	-0.641792	-0.691161	-0.542482	-0.583963	-0.490688	-0.569797	-0.495154	-0.670663	-0.688744	-0.812938	-0.763243	0.00074224	-0.193698	0.0884947	-0.319702	0.344776	turquoise|0.8756
GLUL|NP_001028228.1	M1	turquoise	-0.00290024	0.316505	0.596515	0.391506	0.872738	0.388716	0.0969331	0.752081	0.612594	0.0589254	-0.25142	-0.243837	-0.758588	-0.535908	-0.55001	-0.513725	-0.326834	-0.537566	-0.375429	-0.592034	-0.559429	-0.859791	-0.836298	0.0681855	-0.0171117	0.242379	-0.160784	0.196324	turquoise|0.8727
MDH2|NP_005909.2	M1	turquoise	0.00227001	0.398987	0.457057	0.383436	0.87165	0.528048	0.106008	0.74784	0.670341	-0.0475245	-0.294466	-0.1647	-0.57731	-0.595881	-0.344811	-0.456378	-0.264564	-0.527744	-0.528445	-0.69927	-0.623133	-0.9067	-0.748489	0.139682	-0.247615	0.0542092	-0.336495	0.17907	turquoise|0.8717
PPP3R1|NP_000936.1	M1	turquoise	-0.220155	0.153278	0.736824	0.432767	0.869972	0.261567	-0.109159	0.544726	0.246446	-0.202015	-0.116583	-0.5031	-0.767565	-0.662183	-0.559706	-0.580784	-0.624156	-0.649944	-0.539278	-0.536864	-0.813894	-0.805323	-0.781591	-0.0130862	-0.123474	0.120966	-0.088317	0.128141	turquoise|0.87
TPM1|NP_001018008.1	M1	turquoise	-0.0786896	0.237058	0.530276	0.396366	0.864491	0.475939	0.164753	0.675097	0.549867	-0.0388016	-0.253828	-0.310008	-0.709227	-0.623235	-0.35704	-0.451133	-0.28442	-0.653668	-0.557116	-0.46406	-0.71463	-0.878374	-0.797169	-0.0502601	-0.247223	0.190816	-0.123509	0.11136	turquoise|0.8645
PGM1|NP_002624.2	M1	turquoise	0.130983	0.433579	0.616217	0.644992	0.859433	0.233119	-0.256085	0.282451	0.15104	-0.344037	0.00392767	-0.547696	-0.356241	-0.476415	-0.447008	-0.54353	-0.600893	-0.739475	-0.698916	-0.605722	-0.830181	-0.648357	-0.719859	-0.334224	-0.0828335	-0.0226474	-0.41255	-0.126502	turquoise|0.8594
HPRT1|NP_000185.1	M1	turquoise	-0.0542131	0.312989	0.595379	0.589901	0.858789	0.399593	-0.169358	0.486728	0.521135	0.00424362	0.120747	-0.495274	-0.459931	-0.403271	-0.310679	-0.483927	-0.34338	-0.458857	-0.407196	-0.600505	-0.723243	-0.738613	-0.706719	0.102989	-0.0519476	-0.240239	-0.320536	0.0684197	turquoise|0.8588
ENO1|NP_001419.1	M1	turquoise	0.0106495	0.517949	0.655622	0.543668	0.856449	0.378204	-0.208571	0.538725	0.381966	-0.0162182	0.0512237	-0.446539	-0.457246	-0.380824	-0.508508	-0.465314	-0.478513	-0.526539	-0.395669	-0.750691	-0.655813	-0.764016	-0.789005	-0.0137903	-0.00498729	-0.136176	-0.527579	0.0236285	turquoise|0.8564
NAPB|NP_071363.1	M1	turquoise	-0.00165418	0.478823	0.395744	0.381451	0.853654	0.498239	0.0922755	0.726519	0.69649	0.0277299	-0.159799	-0.139407	-0.580886	-0.504457	-0.357324	-0.368157	-0.184344	-0.39263	-0.376776	-0.685423	-0.462178	-0.854807	-0.745776	0.0506562	-0.237868	-0.0406661	-0.349452	0.240665	turquoise|0.8537
PDXP|NP_064711.1	M1	turquoise	0.210944	0.454778	0.316516	0.724187	0.852707	0.441067	0.0652016	0.473719	0.563618	-0.148546	0.0518215	-0.468165	-0.290142	-0.415681	-0.198844	-0.252616	-0.25084	-0.539502	-0.677659	-0.649492	-0.635715	-0.680525	-0.669802	-0.240746	-0.340264	-0.187516	-0.362655	-0.142046	turquoise|0.8527
HBB|NP_000509.1	M1	turquoise	0.109942	0.321806	0.51872	0.61086	0.851721	0.495665	-0.378282	0.232011	0.30649	-0.138584	0.221464	-0.436208	-0.336034	-0.373492	-0.482083	-0.449466	-0.393794	-0.304697	-0.32107	-0.645808	-0.573983	-0.547949	-0.688898	-0.0716865	-0.0295869	-0.26646	-0.484645	0.250725	turquoise|0.8517
SKP1|NP_733779.1	M1	turquoise	0.361175	0.379915	0.441418	0.712881	0.850399	0.599074	0.100079	0.486997	0.537057	0.111594	0.158665	-0.457737	-0.469448	-0.297645	-0.535589	-0.154077	-0.163455	-0.446196	-0.396509	-0.540297	-0.399806	-0.602726	-0.839091	-0.262099	-0.0833466	-0.00566227	-0.360777	0.0582698	turquoise|0.8504
C3|NP_000055.2	M1	turquoise	0.0115979	0.529714	0.296826	0.610642	0.849767	0.457216	0.0037086	0.461131	0.482292	-0.174287	0.0945803	-0.40965	-0.393586	-0.491484	-0.199326	-0.272909	-0.275909	-0.467067	-0.5659	-0.582148	-0.624006	-0.704567	-0.65058	-0.369706	-0.499774	-0.261685	-0.366424	-0.021194	turquoise|0.8498
TMEM189-UBE2V1|NP_954673.1	M1	turquoise	-0.208912	0.226677	0.619749	0.499888	0.847006	0.228727	-0.301975	0.431431	0.353265	-0.232169	0.00908941	-0.427297	-0.470778	-0.5369	-0.41847	-0.628797	-0.559111	-0.408169	-0.377843	-0.769268	-0.701663	-0.734764	-0.687016	0.277916	0.0116405	-0.168065	-0.309699	0.229845	turquoise|0.847
ALDOA|NP_001121089.1	M1	turquoise	0.25219	0.732748	0.492132	0.722612	0.846162	0.342423	-0.0541066	0.412647	0.468333	0.00352047	0.168321	-0.495914	-0.205218	-0.253504	-0.247812	-0.322931	-0.270722	-0.623697	-0.515205	-0.803544	-0.693978	-0.709611	-0.75487	-0.221476	-0.114989	-0.279022	-0.652833	-0.102869	turquoise|0.8462
DPYSL2|NP_001184222.1	M1	turquoise	0.0552172	0.625156	0.556575	0.469902	0.843362	0.249747	-0.280767	0.348003	0.222576	-0.341835	-0.111125	-0.300172	-0.370606	-0.522416	-0.389526	-0.630324	-0.531081	-0.672104	-0.60174	-0.625289	-0.773751	-0.723416	-0.669612	-0.304942	-0.151913	-0.0589446	-0.520217	0.0203082	turquoise|0.8434
GAPDHS|NP_055179.1	M1	turquoise	-0.137838	0.219508	0.494268	0.339819	0.837885	0.180794	-0.251018	0.466902	0.248508	-0.378002	-0.153739	-0.336395	-0.632104	-0.667018	-0.444933	-0.627801	-0.611891	-0.521449	-0.582141	-0.509424	-0.797708	-0.709896	-0.576497	-0.164745	-0.276169	0.0313539	-0.179696	0.110341	turquoise|0.8379
TPPP|NP_008961.1	M1	turquoise	-0.0889083	0.294979	0.763342	0.58016	0.837241	0.0983811	-0.249936	0.50171	0.323131	-0.0363028	0.132439	-0.600986	-0.612125	-0.387607	-0.631157	-0.632698	-0.635999	-0.510972	-0.296473	-0.588018	-0.723479	-0.682397	-0.750104	0.0727689	0.195342	-0.0177839	-0.273011	-0.0288219	turquoise|0.8372
HSPA1L|NP_005518.3	M1	turquoise	0.140828	0.324362	0.583469	0.749258	0.837123	0.188498	-0.355181	0.205449	0.164341	-0.294266	0.251262	-0.647615	-0.312082	-0.362341	-0.515209	-0.479058	-0.600381	-0.513172	-0.515239	-0.618778	-0.685432	-0.512832	-0.680604	-0.218855	0.037499	-0.180755	-0.398681	-0.0747374	turquoise|0.8371
PAFAH1B2|NP_002563.1	M1	turquoise	-0.213119	0.177891	0.661826	0.583217	0.833764	0.0298528	-0.268932	0.381302	0.234858	-0.161498	0.149423	-0.68932	-0.477633	-0.416127	-0.367017	-0.528475	-0.605761	-0.547449	-0.434703	-0.734983	-0.833876	-0.689301	-0.720025	0.0500315	0.0311079	-0.15042	-0.216562	0.00371826	turquoise|0.8338
CAT|NP_001743.1	M1	turquoise	0.236903	0.653798	0.609492	0.711787	0.8335	0.305582	0.181827	0.607978	0.463666	0.0784003	0.00234543	-0.528408	-0.40845	-0.30123	-0.445724	-0.271577	-0.334231	-0.777946	-0.537758	-0.765761	-0.608249	-0.788376	-0.912151	-0.200277	-0.00210061	0.0634882	-0.482091	-0.195046	turquoise|0.8335
SEPT4|NP_004565.1	M1	turquoise	-0.166333	0.370733	0.532451	0.354203	0.833461	0.497502	-0.130904	0.549358	0.571104	0.0974694	-0.0677135	-0.241356	-0.513391	-0.457596	-0.285638	-0.517244	-0.242737	-0.345441	-0.224756	-0.735571	-0.655404	-0.814128	-0.715386	0.2215	-0.119539	-0.161483	-0.376484	0.35965	turquoise|0.8335
ACTG1|NP_001605.1	M1	turquoise	-0.108638	0.456396	0.639541	0.449139	0.830206	0.156165	0.0956365	0.748777	0.482783	-0.0941104	-0.269516	-0.409726	-0.584958	-0.544793	-0.337012	-0.545689	-0.498443	-0.802454	-0.642256	-0.685886	-0.834066	-0.935337	-0.764486	0.0422066	-0.115697	0.128649	-0.271455	-0.16998	turquoise|0.8302
ACTA1|NP_001091.1	M1	turquoise	-0.0939495	0.491204	0.636028	0.515727	0.829493	0.174541	0.102099	0.724476	0.452065	-0.107794	-0.191306	-0.478062	-0.55603	-0.537002	-0.321709	-0.494407	-0.510218	-0.820793	-0.678285	-0.670125	-0.853583	-0.915313	-0.757709	-0.0253012	-0.177405	0.058871	-0.296206	-0.229948	turquoise|0.8295
KBTBD11|NP_055682.1	M1	turquoise	-0.0503693	0.318032	0.663855	0.485019	0.827811	0.397179	-0.00649551	0.600949	0.33871	-0.119422	-0.147596	-0.358519	-0.719097	-0.577574	-0.689146	-0.442957	-0.518819	-0.531208	-0.432444	-0.576612	-0.478792	-0.749165	-0.826234	-0.0690386	-0.0641882	0.185202	-0.141309	0.144766	turquoise|0.8278
RPL23A|NP_000975.2	M1	turquoise	0.200353	0.29902	0.458948	0.596753	0.827687	0.656037	0.141477	0.510907	0.429338	-0.126103	-0.163548	-0.375542	-0.583419	-0.580905	-0.474378	-0.295336	-0.316615	-0.599009	-0.669809	-0.382363	-0.587555	-0.664897	-0.728318	-0.377713	-0.371953	0.170383	-0.106609	-0.0249581	turquoise|0.8277
DPYSL5|NP_064519.2	M1	turquoise	0.00305049	0.34983	0.712826	0.644644	0.820017	0.181727	-0.307012	0.326896	0.0687849	-0.26925	0.168194	-0.666583	-0.475121	-0.442331	-0.603052	-0.513199	-0.712099	-0.654623	-0.547505	-0.51503	-0.777045	-0.609258	-0.722551	-0.259762	-0.00826318	-0.0673284	-0.379107	-0.163107	turquoise|0.82
HBD|NP_000510.1	M1	turquoise	0.206044	0.382279	0.442171	0.581415	0.817821	0.437066	-0.45575	0.16171	0.227442	-0.241273	0.161666	-0.379677	-0.229669	-0.350551	-0.465532	-0.456798	-0.439257	-0.303925	-0.395241	-0.683167	-0.572244	-0.479157	-0.604641	-0.195307	-0.0646917	-0.252627	-0.541396	0.185454	turquoise|0.8178
SLC44A1|NP_536856.2	M1	turquoise	0.171737	0.565628	0.753053	0.64149	0.81271	0.266658	0.0290466	0.552283	0.321838	0.104115	0.07603	-0.542688	-0.606681	-0.349433	-0.679619	-0.432526	-0.480626	-0.687185	-0.349503	-0.594569	-0.643285	-0.701774	-0.862191	-0.199111	0.0825966	0.120186	-0.387644	-0.0545185	turquoise|0.8127
VPS26A|NP_004887.2	M1	turquoise	0.393675	0.525948	0.424622	0.607369	0.812635	0.518243	0.169716	0.666318	0.732925	0.276888	0.0130999	-0.381333	-0.365312	-0.17142	-0.34048	-0.206563	-0.0732669	-0.55055	-0.454711	-0.589365	-0.528056	-0.719895	-0.780931	-0.122003	-0.0137486	-0.00292557	-0.496669	-0.18775	turquoise|0.8126
GAPDH|NP_002037.2	M1	turquoise	-0.0418995	0.43545	0.600756	0.534003	0.811772	0.417262	0.00569892	0.587139	0.583406	0.300076	0.145828	-0.462692	-0.54035	-0.281708	-0.36576	-0.347085	-0.214489	-0.395458	-0.166585	-0.701091	-0.601695	-0.751197	-0.789385	0.0939307	-0.0230823	-0.169084	-0.339285	0.165444	turquoise|0.8118
IGFN1|NP_001158058.1	M1	turquoise	0.376446	0.596532	0.404641	0.652606	0.803206	0.399776	0.160763	0.672226	0.705435	0.181437	0.0298157	-0.386018	-0.336379	-0.189349	-0.355309	-0.197238	-0.144301	-0.525869	-0.472692	-0.679088	-0.469302	-0.70523	-0.757076	-0.121267	-0.030917	-0.0480762	-0.483448	-0.20586	turquoise|0.8032
NCAN|NP_004377.2	M1	turquoise	0.244328	0.461798	0.598639	0.733524	0.801144	0.36458	0.338954	0.635687	0.445789	0.0205368	-0.120452	-0.545366	-0.536012	-0.415762	-0.508568	-0.24887	-0.35318	-0.834336	-0.637453	-0.555889	-0.5815	-0.745978	-0.901309	-0.275129	-0.0731575	0.290538	-0.204088	-0.260541	turquoise|0.8011
ENOPH1|NP_067027.1	M1	turquoise	-0.0499771	0.288285	0.643478	0.687772	0.800865	0.151071	-0.321613	0.3306	0.212648	-0.121853	0.339881	-0.715848	-0.364337	-0.279944	-0.455229	-0.362724	-0.559778	-0.461148	-0.408967	-0.672646	-0.640529	-0.588472	-0.714326	-0.0446618	0.0763414	-0.301907	-0.372676	-0.091838	turquoise|0.8009
CLDN11|NP_005593.2	M1	turquoise	0.100219	0.22545	0.620915	0.558482	0.799782	0.322865	0.081505	0.585349	0.323656	-0.256643	-0.174902	-0.4607	-0.658776	-0.65036	-0.534111	-0.488089	-0.543242	-0.768456	-0.745362	-0.341897	-0.770309	-0.724125	-0.68051	-0.137481	-0.198965	0.209878	-0.10795	-0.135797	turquoise|0.7998
LGALSL|NP_054900.2	M1	turquoise	0.195895	0.446743	0.492868	0.417579	0.798982	0.298159	-0.196711	0.472369	0.487167	0.13404	0.11871	-0.34982	-0.310765	-0.194877	-0.332069	-0.426487	-0.229997	-0.470748	-0.287321	-0.70502	-0.693331	-0.697578	-0.699938	0.0931059	0.116462	-0.174427	-0.708002	0.0911817	turquoise|0.799
NAPA|NP_003818.2	M1	turquoise	0.0772279	0.530521	0.331104	0.402362	0.797748	0.423107	0.21444	0.738379	0.697021	0.0930288	-0.117577	-0.152516	-0.580844	-0.439591	-0.363524	-0.267246	-0.135512	-0.388291	-0.334529	-0.657976	-0.391353	-0.797714	-0.72258	-0.0493089	-0.262359	0.00125724	-0.325263	0.180696	turquoise|0.7977
ADH5|NP_000662.3	M1	turquoise	0.0728012	0.259966	0.488966	0.550078	0.796319	0.52645	0.21513	0.672891	0.461202	-0.169071	-0.215777	-0.370271	-0.637781	-0.655961	-0.473962	-0.293715	-0.405674	-0.605415	-0.700907	-0.505788	-0.585504	-0.75218	-0.69996	-0.0865391	-0.377458	0.138487	-0.0849622	-0.020061	turquoise|0.7963
HINT1|NP_005331.1	M1	turquoise	0.193351	0.388221	0.603221	0.616757	0.79344	0.475989	-0.279964	0.260877	0.262602	0.0464275	0.146726	-0.481693	-0.313506	-0.21946	-0.560378	-0.394478	-0.378551	-0.417622	-0.258864	-0.658912	-0.525355	-0.527549	-0.792068	-0.162078	0.160096	-0.0466103	-0.493522	0.0863154	turquoise|0.7934
AMPH|NP_001626.1	M1	turquoise	-0.221325	0.225331	0.72516	0.336418	0.792614	0.252339	-0.411279	0.376178	0.279769	0.0285946	0.0949028	-0.403441	-0.513925	-0.366232	-0.457929	-0.646418	-0.462961	-0.382803	-0.132465	-0.64584	-0.725701	-0.702213	-0.71482	0.258176	0.201598	-0.148944	-0.413131	0.318869	turquoise|0.7926
SOD2|NP_000627.2	M1	turquoise	0.180149	0.532926	0.392146	0.416193	0.787662	0.405449	0.15686	0.64009	0.576012	0.115425	-0.214498	-0.257081	-0.359288	-0.307424	-0.244784	-0.245811	-0.152453	-0.606531	-0.501549	-0.814214	-0.573755	-0.80597	-0.787698	-0.0987283	-0.13397	0.080987	-0.470566	-0.0131091	turquoise|0.7877
CUL3|NP_003581.1	M1	turquoise	0.160042	0.425105	0.369766	0.455445	0.785464	0.550825	0.122102	0.417563	0.346206	-0.17027	-0.243114	-0.258901	-0.488462	-0.574665	-0.315941	-0.337017	-0.266535	-0.645134	-0.653353	-0.458272	-0.664421	-0.674335	-0.675502	-0.473784	-0.449486	0.166122	-0.21804	0.0588936	turquoise|0.7855
GNB5|NP_057278.2	M1	turquoise	-0.0579738	0.363599	0.318653	0.406195	0.785178	0.502783	0.169311	0.74311	0.718115	0.144323	0.00997483	-0.276965	-0.49552	-0.38459	-0.226032	-0.155594	-0.0998439	-0.327287	-0.351619	-0.678163	-0.443934	-0.815805	-0.707238	0.149824	-0.284998	-0.194355	-0.37172	0.119169	turquoise|0.7852
RPL36|NP_056229.2	M1	turquoise	-0.146585	0.334346	0.373893	0.356517	0.784583	0.386194	-0.418351	0.259018	0.333088	-0.178599	0.0823204	-0.212744	-0.328097	-0.423453	-0.313369	-0.48942	-0.346186	-0.131425	-0.186483	-0.769081	-0.497169	-0.59392	-0.576916	0.0576052	-0.141392	-0.324525	-0.444801	0.449591	turquoise|0.7846
CSRP1|NP_001180499.1	M1	turquoise	0.17849	0.408831	0.474634	0.715314	0.784311	0.354017	0.125707	0.598639	0.6098	0.1972	0.173932	-0.533507	-0.379948	-0.161606	-0.430027	-0.134138	-0.205479	-0.420296	-0.319987	-0.712039	-0.339358	-0.656621	-0.840161	-0.00505828	0.0992938	-0.0753007	-0.344429	-0.124215	turquoise|0.7843
PFN1|NP_005013.1	M1	turquoise	0.0139157	0.147231	0.665525	0.595969	0.782817	0.364165	-0.419934	0.238749	0.165918	-0.0621269	0.265876	-0.603704	-0.411876	-0.307497	-0.597211	-0.450905	-0.543114	-0.327932	-0.26259	-0.594125	-0.617434	-0.493229	-0.688048	0.0149618	0.132165	-0.17765	-0.355992	0.123614	turquoise|0.7828
YWHAZ|NP_003397.1	M1	turquoise	-0.00326222	0.302684	0.706624	0.31063	0.781761	0.297673	-0.228808	0.579565	0.391236	-0.0697191	-0.179164	-0.240519	-0.609492	-0.499301	-0.533263	-0.693681	-0.475168	-0.558116	-0.398663	-0.461358	-0.725477	-0.757961	-0.65206	0.185859	0.113661	0.0834024	-0.334711	0.138464	turquoise|0.7818
POTEI|XP_933678.1	M1	turquoise	0.0333081	0.591497	0.590208	0.573258	0.778732	0.203663	0.189413	0.64937	0.42318	-0.116915	-0.207138	-0.432114	-0.430371	-0.477864	-0.297943	-0.403349	-0.426432	-0.861277	-0.695307	-0.686047	-0.733376	-0.861769	-0.78107	-0.102385	-0.142068	0.0998094	-0.351125	-0.250916	turquoise|0.7787
ARF6|NP_001654.1	M1	turquoise	-0.0866506	0.350183	0.541697	0.284117	0.778204	0.433661	0.0980019	0.653752	0.348626	-0.129152	-0.353673	-0.207064	-0.678397	-0.614985	-0.503675	-0.413631	-0.415775	-0.630608	-0.541538	-0.51527	-0.569109	-0.818765	-0.771895	-0.147939	-0.232941	0.283105	-0.191227	0.0853402	turquoise|0.7782
PSAT1|NP_478059.1	M1	turquoise	-0.0508256	0.173529	0.42844	0.416694	0.778149	0.437539	0.141848	0.731824	0.692338	0.201116	-0.0210093	-0.311427	-0.670751	-0.417477	-0.427935	-0.279181	-0.195135	-0.246104	-0.208373	-0.634618	-0.42943	-0.734923	-0.703451	0.245043	-0.130471	-0.0142181	-0.127803	0.249128	turquoise|0.7781
SNAP91|NP_001229722.1	M1	turquoise	-0.353512	0.413348	0.60858	0.360726	0.776032	-0.00152015	-0.14354	0.529899	0.328489	-0.323588	-0.231626	-0.301361	-0.517054	-0.613803	-0.279843	-0.696394	-0.580086	-0.620601	-0.500664	-0.684961	-0.731977	-0.851839	-0.654119	0.12671	-0.070916	-0.00796329	-0.199034	0.0593439	turquoise|0.776
CA2|NP_000058.1	M1	turquoise	-0.0207175	0.255145	0.508846	0.656528	0.774574	0.0883455	-0.0940174	0.459025	0.433916	-0.092688	0.229453	-0.541875	-0.533588	-0.354766	-0.483725	-0.386242	-0.433744	-0.337382	-0.308901	-0.525859	-0.442236	-0.569764	-0.657274	-0.0228714	0.0392301	-0.135791	-0.101561	0.0101328	turquoise|0.7746
ARPC2|NP_005722.1	M1	turquoise	0.112589	0.531508	0.30803	0.341995	0.770265	0.579896	0.113367	0.507264	0.556009	-0.0888069	-0.324622	-0.0501539	-0.371303	-0.496001	-0.147726	-0.339116	-0.0827201	-0.546712	-0.577029	-0.571301	-0.526048	-0.772025	-0.667829	-0.220182	-0.3462	0.0463867	-0.333406	0.151582	turquoise|0.7703
MAPK1|NP_002736.3	M1	turquoise	0.0536398	0.337635	0.58873	0.433931	0.769083	0.407332	0.235461	0.675859	0.325308	-0.209451	-0.395615	-0.254132	-0.766482	-0.713965	-0.644281	-0.439462	-0.495471	-0.737776	-0.632322	-0.42155	-0.552303	-0.773869	-0.774236	-0.21573	-0.241445	0.442544	-0.0451399	0.0258226	turquoise|0.7691
HMGCS1|NP_002121.4	M1	turquoise	0.319398	0.541652	0.408751	0.519329	0.76874	0.484376	-0.239685	0.274456	0.201134	-0.362599	-0.131828	-0.285771	-0.175741	-0.455877	-0.332857	-0.427577	-0.432274	-0.65386	-0.776368	-0.543293	-0.722159	-0.586009	-0.566143	-0.397522	-0.270938	-0.0668805	-0.588586	-0.132097	turquoise|0.7687
ILF2|NP_004506.2	M1	turquoise	-0.15007	0.338051	0.36928	0.17191	0.767736	0.561606	0.0774286	0.684597	0.509821	-0.181713	-0.459999	0.0148851	-0.687147	-0.717108	-0.351075	-0.454411	-0.29027	-0.455131	-0.530304	-0.441403	-0.504949	-0.830922	-0.620237	-0.117909	-0.44445	0.18469	-0.101695	0.227153	turquoise|0.7677
SARS|NP_006504.2	M1	turquoise	0.178947	0.296513	0.596209	0.600695	0.767649	0.578721	0.0319891	0.389162	0.129875	-0.258663	-0.11248	-0.461565	-0.587561	-0.61005	-0.619691	-0.331832	-0.508126	-0.721853	-0.713085	-0.271938	-0.630036	-0.593582	-0.724788	-0.480616	-0.304911	0.218456	-0.15119	-0.0950179	turquoise|0.7676
RPS20|NP_001014.1	M1	turquoise	0.154226	0.547037	0.223351	0.470876	0.767296	0.540993	0.229042	0.582261	0.747468	0.0977564	-0.0878186	-0.19552	-0.337246	-0.36482	-0.0159972	-0.192244	0.0484439	-0.450235	-0.511907	-0.576394	-0.540255	-0.7496	-0.616442	-0.161859	-0.413582	-0.170253	-0.331492	0.0375786	turquoise|0.7673
MTPN|NP_665807.1	M1	turquoise	0.201511	0.2821	0.527889	0.621082	0.766664	0.556018	0.0589993	0.45057	0.454891	0.053412	0.0566046	-0.399208	-0.399541	-0.382965	-0.440147	-0.296987	-0.215789	-0.49309	-0.355515	-0.602169	-0.521569	-0.642974	-0.77858	0.120761	-0.00050307	-0.0169206	-0.403737	0.187136	turquoise|0.7667
TPM1|NP_001018004.1	M1	turquoise	0.00234066	0.227956	0.441289	0.353697	0.766347	0.45095	0.251738	0.679071	0.640749	0.0665741	-0.269892	-0.217806	-0.6399	-0.506807	-0.276548	-0.383596	-0.128829	-0.58917	-0.480519	-0.353591	-0.580307	-0.80916	-0.723955	-0.0125735	-0.165044	0.223848	-0.0788855	0.0624928	turquoise|0.7663
GABARAPL2|NP_009216.1	M1	turquoise	-0.0181991	0.379689	0.32797	0.502452	0.764289	0.429268	-0.201806	0.232484	0.311591	-0.322479	-0.0604848	-0.247374	-0.232105	-0.467938	-0.21272	-0.363728	-0.296614	-0.371315	-0.500823	-0.671235	-0.450191	-0.593004	-0.626029	-0.189375	-0.231421	-0.169686	-0.304362	0.203684	turquoise|0.7643
ME2|NP_002387.1	M1	turquoise	0.454442	0.496853	0.569008	0.679119	0.762111	0.467971	0.0675153	0.539769	0.415763	0.133635	0.00419461	-0.482454	-0.366333	-0.205305	-0.594829	-0.206166	-0.324749	-0.61115	-0.500079	-0.633336	-0.496903	-0.593183	-0.800125	-0.225574	0.0653359	0.127108	-0.452883	-0.216364	turquoise|0.7621
CTNNA1|NP_001894.2	M1	turquoise	-0.0605185	0.0744554	0.675449	0.308634	0.757358	0.47152	-0.0252102	0.541128	0.29457	-0.0908707	-0.307127	-0.324184	-0.678592	-0.629706	-0.46473	-0.558264	-0.443814	-0.675939	-0.554846	-0.380881	-0.822317	-0.755344	-0.687308	0.0694013	-0.119045	0.262559	-0.106763	0.134142	turquoise|0.7574
PDHB|NP_000916.2	M1	turquoise	0.281619	0.374961	0.77468	0.743	0.755283	0.310743	0.0467406	0.528847	0.383526	0.234392	0.15763	-0.635644	-0.459879	-0.185682	-0.677116	-0.317295	-0.402836	-0.612831	-0.28854	-0.671118	-0.539185	-0.621108	-0.883279	0.0996715	0.331007	0.097835	-0.399155	-0.0974439	turquoise|0.7553
RPL3|NP_001029025.1	M1	turquoise	0.260092	0.25655	0.223238	0.345776	0.753771	0.713355	0.180851	0.640388	0.689314	0.0524689	-0.215627	-0.0755407	-0.52015	-0.448253	-0.321686	-0.166634	-0.0106609	-0.332237	-0.499947	-0.407756	-0.35921	-0.666789	-0.613268	-0.126975	-0.346574	0.0760803	-0.203424	0.162978	turquoise|0.7538
SUMO2|NP_008868.3	M1	turquoise	-0.144592	0.0488711	0.62905	0.459116	0.753167	0.355985	0.0548138	0.610963	0.542946	0.33702	0.155909	-0.519062	-0.659865	-0.294825	-0.47155	-0.318664	-0.240979	-0.319085	-0.053449	-0.608074	-0.534444	-0.704455	-0.804136	0.374747	0.145263	-0.0201564	-0.168468	0.25295	turquoise|0.7532
LYPLAL1|NP_620149.1	M1	turquoise	0.135936	0.252144	0.677265	0.546035	0.752647	0.254252	-0.0685424	0.508492	0.317344	-0.182756	-0.151755	-0.357215	-0.625157	-0.508142	-0.736891	-0.5815	-0.56614	-0.559281	-0.450953	-0.388593	-0.4942	-0.606657	-0.703664	-0.0200198	0.155406	0.283319	-0.111793	-0.0155497	turquoise|0.7526
CNTN2|NP_005067.1	M1	turquoise	-0.148675	0.503591	0.352733	0.577669	0.747091	0.230869	0.0862394	0.469202	0.581804	0.00368397	0.155103	-0.405859	-0.270451	-0.332624	-0.0307124	-0.264324	-0.151141	-0.403217	-0.330568	-0.779986	-0.529749	-0.74773	-0.672858	0.115951	-0.195564	-0.36206	-0.380857	0.0884423	turquoise|0.7471
ACTN4|NP_004915.2	M1	turquoise	-0.291767	-0.0109515	0.600559	0.275533	0.74702	0.255428	0.145981	0.685135	0.466677	-0.0887763	-0.255177	-0.300568	-0.812065	-0.672242	-0.422491	-0.53795	-0.397726	-0.550927	-0.423162	-0.369949	-0.652373	-0.828867	-0.695811	0.303629	-0.0860966	0.234213	0.0686261	0.199972	turquoise|0.747
MSN|NP_002435.1	M1	turquoise	-0.0542172	0.258531	0.502153	0.650241	0.746877	0.194529	-0.460216	0.0819146	0.166757	-0.295001	0.319346	-0.516169	-0.284163	-0.374645	-0.418714	-0.51901	-0.526994	-0.223066	-0.268625	-0.58804	-0.545319	-0.417742	-0.533394	-0.048665	0.00179509	-0.354826	-0.291521	0.192192	turquoise|0.7469
PPIB|NP_000933.1	M1	turquoise	-0.176292	0.429541	0.761038	0.344004	0.744368	0.135031	-0.250557	0.433884	0.218437	-0.202347	-0.20361	-0.264944	-0.484399	-0.537496	-0.446964	-0.763449	-0.570808	-0.645143	-0.369009	-0.659902	-0.752339	-0.781092	-0.695066	0.219301	0.147462	0.0560071	-0.380766	0.201554	turquoise|0.7444
HRSP12|NP_005827.1	M1	turquoise	0.290226	0.508433	0.620072	0.679384	0.741798	0.204871	-0.0486256	0.429709	0.307039	-0.0917531	0.0623291	-0.477673	-0.281485	-0.298717	-0.499857	-0.38274	-0.438877	-0.66633	-0.495363	-0.719559	-0.584117	-0.633313	-0.745484	0.022271	0.156105	-0.0235957	-0.541191	-0.0967826	turquoise|0.7418
MAT2B|NP_037415.1	M1	turquoise	0.368032	0.611479	0.456559	0.657778	0.740292	0.314547	-0.00953486	0.369894	0.365676	-0.21084	-0.0874582	-0.340183	-0.238429	-0.366048	-0.351726	-0.418115	-0.344208	-0.701066	-0.669155	-0.484017	-0.59775	-0.592869	-0.633746	-0.341853	-0.0800838	0.0386788	-0.428937	-0.229466	turquoise|0.7403
PAICS|NP_006443.1	M1	turquoise	-0.278825	0.304238	0.67742	0.437485	0.740185	0.13719	-0.122006	0.483861	0.255233	-0.127315	-0.0941945	-0.498252	-0.527465	-0.521944	-0.297286	-0.555024	-0.562921	-0.615462	-0.478249	-0.662897	-0.843433	-0.760441	-0.641082	0.079436	-0.129216	-0.0565766	-0.150105	0.0102151	turquoise|0.7402
SH3GL2|NP_003017.1	M1	turquoise	0.164351	0.333578	0.261048	0.313319	0.740167	0.719604	0.282597	0.735345	0.741048	0.0642503	-0.307602	-0.0305651	-0.515659	-0.528755	-0.256876	-0.252929	-0.0236474	-0.426464	-0.499778	-0.460699	-0.468542	-0.782305	-0.622599	0.0712085	-0.378923	0.0907643	-0.304434	0.156984	turquoise|0.7402
ENO2|NP_001966.1	M1	turquoise	0.18954	0.678217	0.475292	0.488287	0.739804	0.347331	-0.252513	0.374081	0.311121	-0.0262271	0.0678915	-0.296487	-0.225304	-0.242028	-0.435159	-0.397931	-0.377317	-0.418176	-0.307808	-0.774422	-0.531244	-0.601376	-0.654011	-0.14855	-0.0162434	-0.180155	-0.706759	0.032539	turquoise|0.7398
PKM|NP_001193728.1	M1	turquoise	0.154546	0.392237	0.467057	0.49058	0.737176	0.486422	-0.327745	0.280372	0.257375	-0.237887	0.0431822	-0.338112	-0.243655	-0.427204	-0.329065	-0.474444	-0.420241	-0.465218	-0.561033	-0.468747	-0.730444	-0.559111	-0.494922	-0.113194	-0.200702	-0.243408	-0.536458	-0.014721	turquoise|0.7372
PPP3CA|NP_000935.1	M1	turquoise	0.107548	0.181063	0.618398	0.463062	0.734524	0.344014	-0.0156935	0.511235	0.228408	-0.172183	-0.181438	-0.414653	-0.632125	-0.533231	-0.660614	-0.507594	-0.561541	-0.670448	-0.559237	-0.2652	-0.663665	-0.620521	-0.684746	-0.18565	-0.0311237	0.340603	-0.168562	-0.155554	turquoise|0.7345
TPM3|NP_705935.1	M1	turquoise	0.120618	0.225047	0.481203	0.410797	0.733851	0.562737	0.240183	0.648646	0.66471	0.301707	-0.123514	-0.295659	-0.546554	-0.30259	-0.315256	-0.269617	-0.023221	-0.52702	-0.32716	-0.378292	-0.514807	-0.738442	-0.782804	0.055071	0.0100334	0.178952	-0.21465	0.0379361	turquoise|0.7339
PTPRZ1|NP_002842.2	M1	turquoise	0.211733	0.541852	0.3245	0.420956	0.732617	0.486977	0.0578087	0.366495	0.340241	-0.250057	-0.378396	-0.113572	-0.277989	-0.503454	-0.249703	-0.387935	-0.248658	-0.652966	-0.66012	-0.587204	-0.554396	-0.662319	-0.661458	-0.390838	-0.289868	0.202385	-0.349828	0.0260418	turquoise|0.7326
EZR|NP_003370.2	M1	turquoise	0.0547147	0.236595	0.37904	0.590241	0.729831	0.361783	-0.351008	0.0871184	0.179117	-0.346683	0.214914	-0.383544	-0.354042	-0.484537	-0.429449	-0.456361	-0.443599	-0.206368	-0.349867	-0.427615	-0.505664	-0.377324	-0.465358	-0.227418	-0.227454	-0.258853	-0.211926	0.258166	turquoise|0.7298
PDCD6|NP_037364.1	M1	turquoise	-0.245414	0.165741	0.456713	0.396605	0.725803	0.283362	0.118341	0.631253	0.509363	-0.0657442	-0.0817778	-0.258909	-0.743615	-0.588183	-0.464534	-0.36174	-0.336347	-0.261131	-0.241238	-0.536451	-0.329382	-0.70381	-0.657731	0.166281	-0.186136	0.0321345	0.087667	0.330072	turquoise|0.7258
PGK2|NP_620061.2	M1	turquoise	-0.342966	0.265084	0.605217	0.305753	0.724611	0.344896	-0.251616	0.392584	0.327871	0.0176024	-0.0803494	-0.300591	-0.538948	-0.447501	-0.33388	-0.593404	-0.392659	-0.326491	-0.147326	-0.573351	-0.624787	-0.682921	-0.646855	0.0920428	-0.0341304	-0.0557771	-0.151472	0.287127	turquoise|0.7246
PHYHIPL|NP_001137246.1	M1	turquoise	-0.177167	0.10512	0.656609	0.36357	0.72433	0.327989	0.0453462	0.616411	0.421859	0.067467	-0.225077	-0.425985	-0.678692	-0.488992	-0.372993	-0.505063	-0.401267	-0.607926	-0.446857	-0.377408	-0.752714	-0.754992	-0.682396	0.0625553	-0.052476	0.215419	0.0301505	-0.0575088	turquoise|0.7243
SNCG|NP_003078.2	M1	turquoise	0.112264	0.66385	0.578629	0.511163	0.722924	0.0932419	-0.374943	0.228961	0.11314	-0.241124	0.0981867	-0.380121	-0.194124	-0.308124	-0.367884	-0.522589	-0.518591	-0.573477	-0.440062	-0.737502	-0.681581	-0.58643	-0.600307	-0.183105	0.0294229	-0.235147	-0.634359	0.0151324	turquoise|0.7229
HSPA2|NP_068814.2	M1	turquoise	0.0350042	0.381745	0.454253	0.755088	0.72218	0.268447	-0.217065	0.139357	0.0989915	-0.212094	0.394133	-0.668537	-0.27946	-0.308761	-0.422544	-0.234125	-0.482187	-0.387752	-0.390028	-0.527864	-0.513053	-0.415759	-0.630849	-0.39098	-0.174602	-0.291983	-0.335174	-0.0755608	turquoise|0.7222
AKR7A2|NP_003680.2	M1	turquoise	-0.0889226	0.139801	0.424379	0.374197	0.719462	0.572637	0.0652805	0.611064	0.562364	0.171619	0.0302709	-0.295202	-0.675795	-0.44467	-0.415059	-0.23851	-0.182279	-0.193427	-0.202684	-0.445077	-0.416526	-0.643692	-0.6187	0.0979173	-0.257341	-0.081663	-0.0684197	0.287035	turquoise|0.7195
RPS8|NP_001003.1	M1	turquoise	-0.154511	0.392972	0.446285	0.214026	0.719201	0.0932054	-0.303782	0.383022	0.297775	-0.0927447	-0.130077	-0.235146	-0.288609	-0.31321	-0.175567	-0.51974	-0.360944	-0.464906	-0.325171	-0.784486	-0.687453	-0.72378	-0.615686	0.0213352	0.0145069	-0.0922478	-0.482349	0.121143	turquoise|0.7192
POTEJ|XP_934799.2	M1	turquoise	0.11086	0.557082	0.642442	0.529653	0.716582	0.277673	0.246684	0.688306	0.419332	-0.0157927	-0.213064	-0.383235	-0.469356	-0.436378	-0.398998	-0.377918	-0.378512	-0.870368	-0.622276	-0.541376	-0.659611	-0.831765	-0.788069	-0.0222585	-0.0283225	0.192462	-0.382953	-0.253932	turquoise|0.7166
ACAT1|NP_000010.1	M1	turquoise	0.173612	0.393266	0.513539	0.31503	0.715685	0.6091	0.0717854	0.637841	0.366798	-0.00505313	-0.339009	-0.124044	-0.649178	-0.520816	-0.654057	-0.362822	-0.357418	-0.514304	-0.439061	-0.428	-0.433549	-0.673467	-0.702212	-0.218963	-0.186015	0.333976	-0.241839	0.0924124	turquoise|0.7157
NAPG|NP_003817.1	M1	turquoise	0.359733	0.475008	0.269031	0.637057	0.713737	0.462961	0.100322	0.49877	0.681065	0.207995	0.285656	-0.368493	-0.236409	-0.111827	-0.255627	-0.100706	0.0140533	-0.320393	-0.28944	-0.479409	-0.360692	-0.555244	-0.635272	-0.0571569	-0.0508099	-0.265508	-0.548584	-0.076199	turquoise|0.7137
SQRDL|NP_067022.1	M1	turquoise	-0.151803	0.462094	0.578547	0.414617	0.713699	0.217786	-0.371259	0.21714	0.0748476	-0.419238	0.000468078	-0.304456	-0.340077	-0.54053	-0.323752	-0.584171	-0.542605	-0.545312	-0.51458	-0.476528	-0.66648	-0.626939	-0.551096	-0.149208	-0.142382	-0.214791	-0.383575	0.113952	turquoise|0.7137
PTGDS|NP_000945.3	M1	turquoise	0.0569957	0.4334	0.584214	0.73282	0.713102	0.106156	0.1746	0.468175	0.399855	0.0246272	0.121464	-0.639561	-0.401465	-0.292	-0.267455	-0.255386	-0.329037	-0.689797	-0.516933	-0.575098	-0.610134	-0.661041	-0.733424	-0.143236	-0.0269031	-0.0568916	-0.137659	-0.233988	turquoise|0.7131
GLOD4|NP_057164.3	M1	turquoise	-0.373886	0.200218	0.524707	0.331411	0.710938	0.125219	-0.102015	0.463046	0.334142	-0.185207	-0.144871	-0.356633	-0.446333	-0.490089	-0.201887	-0.543895	-0.432539	-0.532258	-0.403489	-0.559901	-0.66209	-0.76817	-0.660067	0.166292	-0.0212746	0.00107727	-0.183544	0.026878	turquoise|0.7109
UBE2N|NP_003339.1	M1	turquoise	-0.191559	0.118562	0.603838	0.489315	0.709821	0.164738	-0.376908	0.207532	-0.0684535	-0.4168	0.0967276	-0.552264	-0.483916	-0.526795	-0.57751	-0.506799	-0.737884	-0.470832	-0.462682	-0.406382	-0.633646	-0.495722	-0.597272	-0.202629	-0.0706853	-0.0252392	-0.181734	-0.0102081	turquoise|0.7098
HSPA5|NP_005338.1	M1	turquoise	-0.0844838	0.237394	0.332404	0.434813	0.708661	0.460723	0.102353	0.459796	0.588908	0.0370825	-0.0959614	-0.174959	-0.449822	-0.431601	-0.295199	-0.341027	-0.122822	-0.207647	-0.157065	-0.643126	-0.304677	-0.636116	-0.674529	0.185276	-0.0982367	0.0057976	-0.131636	0.375092	turquoise|0.7087
ATP6V1C1|NP_001686.1	M1	turquoise	-0.202503	0.372924	0.707464	0.420149	0.707617	0.200406	0.0809346	0.514115	0.212555	-0.0562485	-0.116056	-0.481488	-0.58489	-0.513115	-0.328495	-0.449764	-0.456612	-0.800907	-0.511292	-0.479141	-0.804212	-0.795717	-0.745544	-0.0805604	-0.126237	0.100888	-0.187842	-0.049211	turquoise|0.7076
DDT|NP_001077861.1	M1	turquoise	0.127781	0.291853	0.340196	0.543926	0.704584	0.327532	-0.26101	0.23695	0.352181	-0.0150071	0.337539	-0.466012	-0.101815	-0.154787	-0.209378	-0.239779	-0.218443	-0.286874	-0.284142	-0.669086	-0.552516	-0.503124	-0.581312	0.0810535	0.00635532	-0.404437	-0.647606	0.067612	turquoise|0.7046
ANXA6|NP_001146.2	M1	turquoise	-0.063212	0.169894	0.558457	0.432215	0.703566	0.31856	0.0834064	0.453769	0.177009	-0.343739	-0.212436	-0.319786	-0.715772	-0.757497	-0.528386	-0.504695	-0.524645	-0.637631	-0.585622	-0.271879	-0.643156	-0.635852	-0.605822	-0.14582	-0.295593	0.242112	0.0334517	0.157387	turquoise|0.7036
OXR1|NP_001185461.1	M1	turquoise	0.220924	0.430253	0.488406	0.713391	0.701814	0.105552	-0.159775	0.194029	0.0676079	-0.363588	0.110931	-0.603324	-0.244319	-0.344399	-0.419371	-0.370922	-0.573347	-0.690861	-0.698393	-0.406503	-0.651012	-0.453565	-0.590117	-0.517869	-0.0871296	-0.0108597	-0.310221	-0.381303	turquoise|0.7018
RPS23|NP_001016.1	M1	turquoise	0.226264	0.230382	0.497043	0.592982	0.700519	0.595393	0.239593	0.515127	0.458116	0.1556	0.0370258	-0.444694	-0.458429	-0.346534	-0.450446	-0.185205	-0.171665	-0.554524	-0.3874	-0.401485	-0.516715	-0.617476	-0.765167	0.00831825	-0.0630181	0.11548	-0.327179	-0.0132349	turquoise|0.7005
CORO1C|NP_055140.1	M1	turquoise	-0.0334001	0.23156	0.547716	0.610709	0.697762	0.259674	0.419126	0.653805	0.39538	0.0611626	-0.0207954	-0.585279	-0.71407	-0.458937	-0.459971	-0.123459	-0.33291	-0.661925	-0.503639	-0.388516	-0.484696	-0.690006	-0.795712	-0.218841	-0.211064	0.229698	0.113505	-0.166127	turquoise|0.6978
KIAA0528|NP_055617.1	M1	turquoise	0.104826	0.566412	0.293809	0.486542	0.693956	0.403407	0.103924	0.376761	0.503183	-0.0176735	-0.102099	-0.159268	-0.239462	-0.321295	-0.191235	-0.240179	-0.0893303	-0.363877	-0.331631	-0.766347	-0.309684	-0.62317	-0.677581	-0.104695	-0.153324	-0.0684209	-0.333214	0.215591	turquoise|0.694
GYG1|NP_001171650.1	M1	turquoise	-0.0863575	0.377736	0.409018	0.363471	0.689706	0.197853	-0.666049	-0.0104283	0.0621639	-0.326586	0.169769	-0.323572	-0.118154	-0.3224	-0.205801	-0.623016	-0.482696	-0.261073	-0.307117	-0.561988	-0.729912	-0.427567	-0.393268	-0.171543	-0.0846448	-0.399358	-0.533669	0.16724	turquoise|0.6897
LRRC57|NP_694992.2	M1	turquoise	0.0319595	0.251989	0.1698	0.31887	0.687451	0.473131	0.129113	0.535327	0.52961	-0.193369	-0.282369	-0.154969	-0.347116	-0.556824	-0.0476628	-0.292313	-0.181743	-0.461036	-0.668398	-0.510234	-0.652048	-0.691428	-0.455113	-0.048402	-0.52046	-0.0310729	-0.232036	0.00792014	turquoise|0.6875
VPS35|NP_060676.2	M1	turquoise	-0.268295	0.215205	0.498377	0.423499	0.686987	0.346547	-0.248034	0.247406	0.216541	-0.159827	0.170032	-0.34486	-0.523174	-0.475275	-0.385269	-0.38815	-0.365624	-0.206667	-0.190735	-0.412156	-0.399004	-0.529835	-0.576956	-0.0697827	-0.163568	-0.239533	-0.0786851	0.353402	turquoise|0.687
GDI2|NP_001485.2	M1	turquoise	-0.044774	0.216981	0.487556	0.358588	0.685699	0.189469	-0.425792	0.324424	0.429218	0.197134	0.275408	-0.37937	-0.262184	-0.0464267	-0.301449	-0.412866	-0.230607	-0.128405	0.00748976	-0.662754	-0.475565	-0.525841	-0.589397	0.272888	0.315821	-0.324666	-0.482484	0.193768	turquoise|0.6857
RNH1|NP_002930.2	M1	turquoise	0.0367199	0.3471	0.519817	0.494576	0.685705	0.147047	-0.360234	0.328585	0.379196	0.0362409	0.237972	-0.387684	-0.356136	-0.199818	-0.45899	-0.515295	-0.4005	-0.166768	-0.0839082	-0.591831	-0.478131	-0.465426	-0.516621	0.133961	0.186639	-0.254671	-0.358296	0.139492	turquoise|0.6857
HSPA8|NP_694881.1	M1	turquoise	-0.14522	0.343276	0.480688	0.462204	0.685573	0.304775	0.0131293	0.50275	0.559068	0.433739	0.352707	-0.505804	-0.460946	-0.117706	-0.22187	-0.190796	-0.0899398	-0.212813	0.0368583	-0.645519	-0.506451	-0.634971	-0.679495	0.160562	-0.0162689	-0.337644	-0.325788	0.1866	turquoise|0.6856
ACADS|NP_000008.1	M1	turquoise	-0.185465	0.163189	0.62164	0.31602	0.684362	0.187551	-0.222484	0.417985	0.250955	-0.329558	-0.25711	-0.133801	-0.61294	-0.64673	-0.614603	-0.742971	-0.583068	-0.365979	-0.277312	-0.460401	-0.448756	-0.621335	-0.58132	0.26482	0.11787	0.187443	-0.0628241	0.337742	turquoise|0.6844
PPP1R7|NP_002703.1	M1	turquoise	-0.17596	0.364826	0.350615	0.552317	0.679994	0.242422	-0.0911973	0.311988	0.369079	-0.249639	-0.00243024	-0.411553	-0.231408	-0.427268	-0.049637	-0.405389	-0.346973	-0.457588	-0.528138	-0.498216	-0.618447	-0.609556	-0.510077	-0.135852	-0.267547	-0.217155	-0.181203	-0.154316	turquoise|0.68
TXN|NP_003320.2	M1	turquoise	-0.205264	-0.0405349	0.365978	0.411917	0.675846	0.247963	-0.1364	0.409834	0.590676	0.178055	0.201297	-0.392367	-0.403933	-0.19964	-0.227392	-0.312429	-0.140447	-0.0239707	0.00117028	-0.602455	-0.351809	-0.53982	-0.590626	0.404357	0.145252	-0.226027	-0.0946961	0.280599	turquoise|0.6758
CDC42BPB|NP_006026.3	M1	turquoise	0.156224	0.196095	0.690972	0.52206	0.66291	0.352182	0.263488	0.558057	0.200626	-0.0673103	-0.332276	-0.468451	-0.55961	-0.468823	-0.601634	-0.334407	-0.477508	-0.892239	-0.658429	-0.382991	-0.597826	-0.673238	-0.833241	-0.143105	0.0711754	0.547425	-0.0947839	-0.265211	turquoise|0.6629
DNAJA2|NP_005871.1	M1	turquoise	0.298851	0.40255	0.197363	0.462612	0.660905	0.505443	-0.149327	0.391921	0.500793	0.132316	0.193232	-0.298579	-0.181783	-0.069398	-0.253725	-0.0707007	-0.0689418	-0.178386	-0.313033	-0.493713	-0.315269	-0.437885	-0.520208	-0.255828	-0.132039	-0.268135	-0.486853	-0.0766202	turquoise|0.6609
RPS26|NP_001020.2	M1	turquoise	0.212096	0.402325	0.285246	0.376981	0.656396	0.706191	-0.0335792	0.207626	0.302168	-0.05316	0.0120572	-0.113029	-0.341116	-0.443174	-0.254353	-0.241509	-0.0431297	-0.336925	-0.332045	-0.348078	-0.475648	-0.486075	-0.530974	-0.305525	-0.399011	-0.124307	-0.376796	0.398815	turquoise|0.6564
ETFB|NP_001014763.1	M1	turquoise	-0.08237	0.407968	0.544108	0.386454	0.655889	0.167817	0.0908269	0.547873	0.220341	-0.164701	-0.311418	-0.387787	-0.519603	-0.531174	-0.322348	-0.443859	-0.532594	-0.753044	-0.650778	-0.508473	-0.773804	-0.710819	-0.589699	-0.252277	-0.280048	0.218235	-0.105923	-0.235749	turquoise|0.6559
SRP14|NP_003125.3	M1	turquoise	0.258362	0.341858	0.12479	0.404144	0.653377	0.716687	0.259556	0.431199	0.671303	0.124413	-0.186601	-0.0928729	-0.259876	-0.327638	-0.0369713	-0.139065	0.154589	-0.358888	-0.435433	-0.41146	-0.414684	-0.579604	-0.556403	-0.178424	-0.362522	0.0212913	-0.247546	0.106073	turquoise|0.6534
SEC14L2|NP_036561.1	M1	turquoise	0.0013991	0.117971	0.712214	0.527828	0.652271	0.169167	0.141352	0.491636	0.0791016	-0.129052	-0.165167	-0.565754	-0.60731	-0.449788	-0.670962	-0.324591	-0.589149	-0.780384	-0.534465	-0.413159	-0.525341	-0.616502	-0.828048	-0.132675	0.132061	0.451884	-0.0331137	-0.201104	turquoise|0.6523
ORM1|NP_000598.2	M1	turquoise	0.326901	0.476617	0.350533	0.390561	0.647028	0.263892	-0.417282	0.034373	0.0298937	-0.377979	-0.138836	-0.211538	-0.0174458	-0.296598	-0.277952	-0.491364	-0.419611	-0.549217	-0.606277	-0.556942	-0.654498	-0.408954	-0.463073	-0.423558	-0.0542238	-0.0107476	-0.576105	-0.0530668	turquoise|0.647
S100A1|NP_006262.1	M1	turquoise	0.501203	0.320719	0.459175	0.70143	0.64159	0.358816	0.125631	0.274496	0.361384	0.183977	0.23677	-0.493671	-0.230124	-0.0593405	-0.475169	-0.0896477	-0.102053	-0.51011	-0.293018	-0.481465	-0.330744	-0.427595	-0.758943	-0.142881	0.241814	0.0553512	-0.437071	-0.0539022	turquoise|0.6416
GPS1|NP_004118.3	M1	turquoise	0.217747	0.392155	0.675391	0.67287	0.64125	0.0542177	0.0200132	0.291945	0.162354	-0.0509651	0.0584039	-0.544644	-0.424356	-0.260012	-0.593883	-0.438278	-0.469826	-0.679113	-0.366539	-0.376375	-0.50622	-0.471512	-0.725568	-0.248587	0.272108	0.245682	-0.169818	-0.185072	turquoise|0.6412
RDX|NP_002897.1	M1	turquoise	-0.248768	0.219314	0.466197	0.329297	0.640279	0.316868	-0.45831	0.0628246	-0.033792	-0.541125	-0.11403	-0.182081	-0.41789	-0.695902	-0.41114	-0.661026	-0.6209	-0.254354	-0.374397	-0.436129	-0.56704	-0.439468	-0.380233	-0.137972	-0.302431	-0.115743	-0.0838211	0.393499	turquoise|0.6403
ESD|NP_001975.1	M1	turquoise	0.0634978	0.555361	0.257803	0.601139	0.639962	0.232464	0.422244	0.571876	0.571451	0.00662806	-0.0515696	-0.340715	-0.375073	-0.381001	-0.117705	-0.0980134	-0.121761	-0.508345	-0.483057	-0.607872	-0.395274	-0.659701	-0.612506	-0.200509	-0.379958	-0.0403908	-0.104508	-0.106635	turquoise|0.64
HP|NP_005134.1	M1	turquoise	0.025385	0.140944	0.329552	0.418385	0.637812	0.531304	-0.3647	0.131763	0.0454436	-0.324054	0.118951	-0.374669	-0.285681	-0.443366	-0.364956	-0.261798	-0.443598	-0.260895	-0.505376	-0.341448	-0.537019	-0.374616	-0.407973	-0.313075	-0.375307	-0.238971	-0.294364	0.0549936	turquoise|0.6378
STIP1|NP_006810.1	M1	turquoise	-0.0446441	0.418758	0.484967	0.41771	0.635381	0.13889	-0.485753	0.0263042	0.100414	-0.297331	0.125922	-0.23115	-0.195031	-0.329085	-0.36098	-0.628089	-0.430646	-0.281929	-0.174549	-0.488799	-0.466623	-0.421474	-0.492221	-0.0559648	0.142366	-0.215139	-0.429657	0.261247	turquoise|0.6354
GNPDA1|NP_005462.1	M1	turquoise	0.0485014	0.198559	0.582356	0.396871	0.634628	0.123705	-0.309311	0.0854927	0.0633405	-0.105223	0.0430449	-0.392569	-0.268928	-0.248993	-0.345213	-0.486026	-0.363764	-0.508358	-0.283191	-0.533186	-0.607949	-0.47059	-0.629585	-0.0583427	0.243822	0.0184531	-0.31185	0.192342	turquoise|0.6346
ACTR2|NP_005713.1	M1	turquoise	0.259948	0.310452	0.162697	0.283296	0.633419	0.545176	-0.219742	0.172421	0.397494	-0.0868984	-0.0101371	-0.0832401	-0.107965	-0.251772	-0.0618124	-0.309553	-0.000430007	-0.31107	-0.417791	-0.309725	-0.51879	-0.460787	-0.417186	-0.218142	-0.193036	-0.191277	-0.513833	0.128767	turquoise|0.6334
HAPLN2|NP_068589.1	M1	turquoise	0.238554	0.201408	0.600169	0.773959	0.63334	0.175314	0.421834	0.613709	0.327394	0.0962551	0.0935731	-0.718237	-0.573524	-0.273907	-0.625333	-0.0430836	-0.391894	-0.723095	-0.518355	-0.366517	-0.384521	-0.555168	-0.819498	-0.174312	0.084397	0.30967	-0.0111419	-0.406481	turquoise|0.6333
QDPR|NP_000311.2	M1	turquoise	0.050295	0.219254	0.483875	0.470766	0.630803	0.24195	-0.463347	0.139673	0.0859424	-0.236777	0.253479	-0.331213	-0.373504	-0.340652	-0.640256	-0.462199	-0.518678	-0.115738	-0.126115	-0.425031	-0.328388	-0.320635	-0.473261	-0.0353958	0.0910384	-0.193272	-0.321058	0.267126	turquoise|0.6308
EFHD2|NP_077305.2	M1	turquoise	-0.319682	0.114828	0.496052	0.585084	0.628152	0.0102312	-0.0359224	0.326617	0.268135	0.0441733	0.344925	-0.733957	-0.385893	-0.261232	-0.178434	-0.278958	-0.393414	-0.370377	-0.20053	-0.568439	-0.656099	-0.542721	-0.595222	0.120951	-0.0453228	-0.264296	-0.115673	-0.0585289	turquoise|0.6282
PLCB1|NP_056007.1	M1	turquoise	-0.200721	0.379953	0.201522	0.373862	0.625451	0.225499	-0.348877	0.0576995	0.222242	-0.236553	0.249966	-0.208367	-0.195496	-0.371494	-0.12671	-0.373701	-0.25244	-0.0146281	-0.0777555	-0.660988	-0.395607	-0.41661	-0.397272	-0.0523507	-0.28208	-0.481123	-0.36456	0.481347	turquoise|0.6255
AP2B1|NP_001273.1	M1	turquoise	-0.0230037	0.469677	0.224199	0.200782	0.625544	0.401521	0.156286	0.450246	0.386495	-0.254906	-0.482909	0.0260833	-0.329568	-0.559733	-0.0538301	-0.378443	-0.159693	-0.621989	-0.635475	-0.414913	-0.53674	-0.719164	-0.537298	-0.290379	-0.409227	0.197842	-0.228032	0.0144622	turquoise|0.6255
GSTO1|NP_004823.1	M1	turquoise	0.161812	0.254654	0.357886	0.491532	0.617232	0.420099	-0.412377	0.0366734	0.246584	-0.0303436	0.367413	-0.27074	-0.176949	-0.189226	-0.400776	-0.331373	-0.196054	-0.00156389	0.00784213	-0.517676	-0.297786	-0.293527	-0.470688	0.0638319	0.0800795	-0.382123	-0.471353	0.442606	turquoise|0.6172
DCLK1|NP_004725.1	M1	turquoise	0.180769	0.325504	0.106063	0.410158	0.616412	0.574241	-0.0746047	0.247702	0.291711	-0.236939	0.0731874	-0.227458	-0.139429	-0.396774	-0.0856129	-0.0501602	-0.140427	-0.288918	-0.594912	-0.479934	-0.473765	-0.461933	-0.381871	-0.261737	-0.565429	-0.350002	-0.432476	0.0767574	turquoise|0.6164
PRDX2|NP_005800.3	M1	turquoise	0.229235	0.367545	0.151975	0.629291	0.613652	0.438933	-0.250905	0.0188543	0.251832	-0.134648	0.511042	-0.439563	-0.00403582	-0.148415	-0.121735	-0.0518729	-0.108642	-0.152504	-0.329855	-0.408184	-0.382614	-0.289463	-0.40854	-0.30075	-0.27676	-0.584234	-0.54505	0.0468156	turquoise|0.6137
HAPLN1|NP_001875.1	M1	turquoise	0.442022	0.406167	0.541933	0.71874	0.612509	0.345657	0.535389	0.64305	0.464744	0.281941	-0.0616569	-0.547502	-0.448126	-0.171595	-0.514599	-0.0192614	-0.176096	-0.784216	-0.503239	-0.424166	-0.390515	-0.588129	-0.839813	-0.224483	0.0893925	0.393233	-0.176689	-0.402575	turquoise|0.6125
PLLP|NP_057077.1	M1	turquoise	-0.00203068	0.123931	0.633892	0.549949	0.604885	0.322854	0.153414	0.463441	0.309947	0.179641	0.124097	-0.618413	-0.561046	-0.329454	-0.364053	-0.271605	-0.307707	-0.590029	-0.366814	-0.231478	-0.696319	-0.55941	-0.619583	-0.01342	-0.059725	0.0456689	-0.0402167	-0.142058	turquoise|0.6049
PDCD6IP|NP_001155901.1	M1	turquoise	-0.66933	-0.0349962	0.647651	0.0926353	0.603812	0.100157	-0.375831	0.341123	0.154483	-0.1524	-0.115711	-0.264485	-0.608607	-0.55448	-0.282494	-0.722604	-0.525304	-0.270591	-0.0881197	-0.422071	-0.659447	-0.659361	-0.502413	0.394749	0.0492573	-0.0595151	0.0244658	0.384196	turquoise|0.6038
ACTN2|NP_001094.1	M1	turquoise	-0.266588	0.0855165	0.503512	0.35552	0.597228	0.126577	0.275352	0.62958	0.453814	0.0208865	-0.0259157	-0.369744	-0.701713	-0.512723	-0.29143	-0.34878	-0.267032	-0.473468	-0.294755	-0.25509	-0.525799	-0.685662	-0.586015	0.255015	-0.113354	0.0753145	0.092216	0.0998847	turquoise|0.5972
PEPD|NP_000276.2	M1	turquoise	0.115813	0.603368	0.202519	0.431763	0.596296	0.431231	0.120036	0.263932	0.489406	0.154897	0.186291	-0.203204	-0.132575	-0.19099	-0.0184232	-0.153495	0.0760774	-0.303875	-0.169927	-0.582761	-0.429791	-0.553983	-0.539251	-0.0778839	-0.252324	-0.332273	-0.585599	0.200312	turquoise|0.5963
CNRIP1|NP_056278.1	M1	turquoise	-0.020856	0.209118	0.267541	0.332238	0.596219	0.0517653	-0.547709	0.0292937	0.152724	-0.207872	0.295181	-0.290839	-0.0381042	-0.138449	-0.184257	-0.3891	-0.298019	-0.0974096	-0.122632	-0.636167	-0.42983	-0.355606	-0.411998	0.0862023	0.136278	-0.413578	-0.553827	0.256672	turquoise|0.5962
PHPT1|NP_054891.2	M1	turquoise	0.075838	0.220299	0.513769	0.666318	0.594052	0.0914836	-0.127523	0.155813	-0.0789532	-0.378383	0.0633411	-0.597817	-0.266686	-0.409047	-0.482711	-0.277516	-0.640884	-0.553264	-0.563233	-0.603569	-0.521667	-0.386784	-0.569883	-0.235995	-0.0787277	0.0292099	-0.147652	-0.126043	turquoise|0.5941
CCT2|NP_006422.1	M1	turquoise	0.197008	0.524162	0.418142	0.644248	0.592101	0.0577574	0.122735	0.315895	0.244866	0.0616594	0.0497463	-0.57536	-0.114442	-0.0526282	-0.238004	-0.152078	-0.295506	-0.66138	-0.440147	-0.66499	-0.49343	-0.501143	-0.712713	-0.349134	0.0982064	0.0956668	-0.36588	-0.416245	turquoise|0.5921
SEPT11|NP_060713.1	M1	turquoise	-0.227362	-0.106519	0.444404	0.344256	0.589733	0.171381	-0.212212	0.226282	0.230985	0.0455458	0.142143	-0.508474	-0.359631	-0.255489	-0.1609	-0.307889	-0.292773	-0.245372	-0.200999	-0.536884	-0.617666	-0.470099	-0.499601	0.176065	-0.00028121	-0.169511	-0.045743	0.178918	turquoise|0.5897
HSDL2|NP_115679.2	M1	turquoise	0.031142	0.344035	0.379281	0.598993	0.589041	0.296808	-0.324427	0.0552079	0.142443	0.0394179	0.504542	-0.580887	-0.123274	-0.0824351	-0.282134	-0.211994	-0.301291	-0.172201	-0.101116	-0.483962	-0.485952	-0.301339	-0.490247	-0.188434	-0.0435869	-0.436656	-0.484706	-0.000493116	turquoise|0.589
RPS19|NP_001013.1	M1	turquoise	0.159548	0.169265	0.218197	0.294902	0.580394	0.549689	-0.397891	-0.0351482	0.0736226	-0.201388	0.0245825	-0.173858	-0.0773186	-0.301959	-0.249368	-0.320388	-0.238021	-0.170178	-0.288509	-0.503103	-0.499113	-0.300749	-0.399264	-0.188309	-0.194737	-0.157905	-0.479803	0.309066	turquoise|0.5804
MARS|NP_004981.2	M1	turquoise	-0.202936	-0.03156	0.375218	0.24286	0.578795	0.3539	0.0896091	0.592448	0.448809	0.0299496	-0.0330141	-0.167113	-0.785946	-0.514207	-0.544615	-0.273762	-0.26558	-0.0622506	-0.0762982	-0.264527	-0.180166	-0.52708	-0.50231	0.200231	-0.161207	0.0761839	0.16439	0.374165	turquoise|0.5788
ADD1|NP_054909.2	M1	turquoise	0.271647	0.400982	0.200104	0.532948	0.576994	0.228097	-0.392415	-0.00309324	0.289695	0.0603849	0.389323	-0.375353	0.155161	0.133018	-0.142559	-0.168788	-0.0914347	-0.0990997	-0.0946798	-0.674252	-0.29398	-0.263992	-0.490273	-0.137616	0.20274	-0.407706	-0.653502	0.021401	turquoise|0.577
OMG|NP_002535.3	M1	turquoise	-0.303644	0.41923	0.246107	0.425405	0.576671	-0.221006	-0.0589535	0.413541	0.469748	0.0940417	0.381351	-0.449736	-0.304422	-0.122061	-0.0334	-0.211403	-0.215377	-0.100279	-0.010505	-0.729152	-0.376415	-0.536947	-0.449691	0.10522	-0.0886188	-0.484532	-0.223544	0.0686276	turquoise|0.5767
ARPC5L|NP_112240.1	M1	turquoise	-0.133679	0.318022	0.444972	0.306425	0.576253	0.233892	0.00531335	0.31022	0.415133	0.101102	-0.0834028	-0.201366	-0.305	-0.24063	-0.141298	-0.373469	-0.11105	-0.382184	-0.172186	-0.508232	-0.395836	-0.618699	-0.610403	0.100021	0.104186	-0.0167928	-0.196532	0.147756	turquoise|0.5763
TSN|NP_004613.1	M1	turquoise	-0.210815	0.218347	0.376663	0.538083	0.57434	-0.0316353	-0.209358	0.150431	0.0920209	-0.180649	0.206314	-0.543994	-0.241258	-0.217085	-0.297611	-0.237077	-0.464611	-0.238642	-0.218988	-0.662113	-0.324711	-0.384594	-0.556613	-0.166554	0.0120623	-0.158549	-0.0864081	-0.023156	turquoise|0.5743
ATP6V1A|NP_001681.2	M1	turquoise	-0.377717	0.148413	0.610049	0.214377	0.573249	0.0524279	0.0302152	0.466428	0.0151837	-0.499836	-0.450772	-0.242592	-0.658295	-0.793183	-0.35995	-0.577722	-0.654554	-0.762509	-0.696852	-0.263058	-0.669734	-0.71497	-0.522725	-0.069999	-0.251531	0.316046	0.164548	-0.0224646	turquoise|0.5732
USP9X|NP_001034680.2	M1	turquoise	0.457341	0.391985	0.41281	0.572778	0.566492	0.339015	0.000182188	0.0991361	0.0706187	0.0822244	0.18892	-0.454508	-0.176054	-0.0556012	-0.461164	-0.0631322	-0.174729	-0.527578	-0.306541	-0.433696	-0.358737	-0.314347	-0.692195	-0.484626	0.106027	0.106189	-0.450101	-0.046244	turquoise|0.5665
LSAMP|NP_002329.2	M1	turquoise	0.167109	0.483253	0.206314	0.207605	0.562248	0.590272	0.250463	0.493392	0.484732	0.0159529	-0.21367	0.00614622	-0.330022	-0.439784	-0.0435961	-0.164376	0.0478269	-0.482233	-0.513915	-0.331495	-0.51984	-0.642882	-0.44321	-0.118966	-0.493131	-0.0636236	-0.380318	0.141603	turquoise|0.5622
RPL6|NP_000961.2	M1	turquoise	0.247084	0.696729	0.117617	0.406633	0.554498	0.301055	0.141919	0.249697	0.46225	0.140906	0.0984104	-0.149676	-0.0861224	-0.0670036	-0.00900742	-0.101468	0.127095	-0.370437	-0.225872	-0.451099	-0.306344	-0.47385	-0.540397	-0.4242	-0.171839	-0.147549	-0.503641	-0.00668488	turquoise|0.5545
ARPC4-TTLL3|NP_001185722.1	M1	turquoise	0.118285	0.459247	0.0322139	0.369405	0.553262	0.684018	0.169277	0.301501	0.546026	-0.00185827	-0.0151122	-0.0440526	-0.0653131	-0.307722	0.131425	-0.0293276	0.188988	-0.260712	-0.391545	-0.427423	-0.31642	-0.534741	-0.445069	-0.118194	-0.477151	-0.301397	-0.430513	0.161501	turquoise|0.5533
HBA2|NP_000508.1	M1	turquoise	0.22178	0.336854	0.0427505	0.487248	0.552766	0.529277	-0.0355943	0.169484	0.576229	0.361899	0.483552	-0.324905	0.00745581	0.0913591	0.0501475	0.0898769	0.259677	0.046785	0.018482	-0.541651	-0.263009	-0.326501	-0.451615	-0.0364669	-0.157271	-0.549737	-0.538979	0.20013	turquoise|0.5528
HADHB|NP_000174.1	M1	turquoise	0.280133	0.175366	0.53552	0.582597	0.548404	0.497443	0.194495	0.328288	-0.00134191	-0.104854	-0.114931	-0.4549	-0.505663	-0.424082	-0.725209	-0.0936311	-0.448498	-0.600525	-0.503534	-0.303355	-0.321601	-0.381343	-0.69525	-0.411492	-0.12267	0.415873	-0.0332149	-0.0995922	turquoise|0.5484
CAPZB|NP_004921.1	M1	turquoise	0.234319	0.479477	0.0057646	0.561555	0.546755	0.470666	0.146091	0.188021	0.504718	-0.0793607	0.0159992	-0.179952	0.00855834	-0.219302	0.10875	-0.0383877	0.0989682	-0.268797	-0.45044	-0.46241	-0.262784	-0.396451	-0.416561	-0.358234	-0.391493	-0.226844	-0.228497	-0.0346356	turquoise|0.5468
AKR1A1|NP_006057.1	M1	turquoise	0.112951	0.138464	0.517862	0.713934	0.545779	0.0220097	0.430444	0.613755	0.44155	0.20034	0.207349	-0.724611	-0.448756	-0.133099	-0.340957	0.0273329	-0.227288	-0.631713	-0.433875	-0.353	-0.365814	-0.551746	-0.713856	0.0477679	0.148338	0.0953795	0.0128821	-0.436056	turquoise|0.5458
ARFRP1|NP_003215.1	M1	turquoise	0.250711	0.224623	0.355792	0.474532	0.542595	0.216409	0.0734847	0.238037	0.247249	0.010482	0.023133	-0.421499	-0.234257	-0.198277	-0.245849	-0.284694	-0.210533	-0.566372	-0.410925	-0.257373	-0.602813	-0.407207	-0.519047	-0.226852	0.0089598	0.140035	-0.279214	-0.211925	turquoise|0.5426
ITGA2|NP_002194.2	M1	turquoise	0.215053	0.0759251	0.53903	0.416154	0.541012	0.491616	0.169307	0.45619	0.336749	0.363461	0.0905109	-0.399073	-0.653514	-0.228035	-0.616907	-0.181397	-0.165306	-0.339914	-0.0853217	-0.13431	-0.382389	-0.401146	-0.612713	-0.0867824	0.048384	0.242338	-0.0332159	0.0941577	turquoise|0.541
MYL6|NP_524147.2	M1	turquoise	-0.026538	0.379743	0.444005	0.146329	0.540206	0.238611	0.0620465	0.430539	0.333362	-0.145503	-0.485817	0.104741	-0.389158	-0.470317	-0.324273	-0.555898	-0.23438	-0.518313	-0.30617	-0.450512	-0.350556	-0.650516	-0.585791	0.137187	0.107756	0.349613	-0.210372	0.238292	turquoise|0.5402
CA1|NP_001122303.1	M1	turquoise	-0.163701	0.0358266	0.594944	0.390702	0.533874	0.0594014	-0.388772	0.197118	0.0278543	-0.0147985	0.218447	-0.644114	-0.212468	-0.146256	-0.235696	-0.37351	-0.504949	-0.428046	-0.312184	-0.474057	-0.760566	-0.435493	-0.463753	0.128885	0.155378	-0.218456	-0.307974	-0.183629	turquoise|0.5339
ARPC4|NP_005709.1	M1	turquoise	0.191767	0.45288	-0.0507725	0.302252	0.531761	0.657034	0.213338	0.311348	0.545268	-0.0749871	-0.128692	0.0157055	-0.0463612	-0.328254	0.217575	-0.00914841	0.221795	-0.349337	-0.559535	-0.316209	-0.362566	-0.533106	-0.375054	-0.271576	-0.575028	-0.227943	-0.384741	0.0371601	turquoise|0.5318
GOT2|NP_002071.2	M1	turquoise	-0.166913	0.397732	0.320817	0.0379134	0.530545	0.371536	0.118907	0.576091	0.28771	-0.197448	-0.504431	0.0331986	-0.417461	-0.551697	-0.126081	-0.312355	-0.255554	-0.594895	-0.609222	-0.380834	-0.506082	-0.744467	-0.481305	-0.123317	-0.392505	0.173252	-0.211372	-0.0307636	turquoise|0.5305
DECR1|NP_001350.1	M1	turquoise	0.0841812	0.207797	0.473628	0.297546	0.529194	0.247746	-0.0834561	0.233375	-0.180023	-0.53608	-0.399681	-0.252723	-0.435875	-0.633732	-0.520119	-0.460347	-0.660039	-0.759825	-0.779739	-0.154199	-0.629417	-0.446099	-0.458916	-0.507604	-0.264226	0.432111	-0.0837918	-0.208756	turquoise|0.5292
HSPE1|NP_002148.1	M1	turquoise	0.0845076	-0.0700889	0.463929	0.534044	0.527922	0.249269	0.0895846	0.301897	0.141313	0.0427198	-0.0114181	-0.608581	-0.420793	-0.217414	-0.444394	-0.128249	-0.37099	-0.474294	-0.408988	-0.295702	-0.42993	-0.351116	-0.607681	-0.259616	0.0399495	0.297866	0.140056	-0.266414	turquoise|0.5279
CNDP2|NP_060705.2	M1	turquoise	-0.144942	-0.0395646	0.533832	0.508673	0.526869	0.0517415	-0.138421	0.370558	0.316002	0.158968	0.379051	-0.532573	-0.476463	-0.129442	-0.561561	-0.246626	-0.361331	-0.0353291	0.11816	-0.445956	-0.169767	-0.362346	-0.564645	0.386954	0.357069	-0.143006	-0.0433597	0.143588	turquoise|0.5269
RPS4X|NP_000998.1	M1	turquoise	0.437356	0.171987	0.363949	0.494185	0.523021	0.614842	0.434465	0.485215	0.376883	0.290475	0.0406525	-0.338599	-0.500738	-0.18607	-0.539362	0.132998	0.0269951	-0.48608	-0.314645	-0.112662	-0.160691	-0.420689	-0.716158	-0.29369	-0.0442445	0.317356	-0.147696	-0.0616646	turquoise|0.523
RPS7|NP_001002.1	M1	turquoise	-0.0481354	0.210085	0.125994	0.451014	0.52268	0.257892	0.270942	0.516989	0.651602	0.373795	0.290292	-0.434551	-0.317095	-0.0394436	-0.0684646	0.0331804	0.0615736	-0.121527	-0.0425134	-0.389511	-0.278604	-0.474219	-0.5095	0.027333	-0.143434	-0.202506	-0.187835	-0.135735	turquoise|0.5227
S100A8|NP_002955.2	M1	turquoise	0.347242	0.345332	0.482751	0.396539	0.52145	0.373021	-0.0236441	0.239365	0.0618305	0.172128	0.10877	-0.404392	-0.371791	-0.0930859	-0.560238	-0.114765	-0.249624	-0.495692	-0.271712	-0.222341	-0.400053	-0.339031	-0.610543	-0.507424	0.045079	0.183143	-0.342741	-0.137538	turquoise|0.5215
RPS15|NP_001009.1	M1	turquoise	-0.0243101	0.256859	0.041391	0.0166996	0.519249	0.379843	-0.415378	0.026903	0.109436	-0.21652	-0.114815	0.0381198	-0.0389896	-0.280522	-0.0219406	-0.309525	-0.145019	-0.0981643	-0.236324	-0.583759	-0.459386	-0.370803	-0.301626	-0.209665	-0.306825	-0.199253	-0.508546	0.3686	turquoise|0.5192
FAM49B|NP_057707.3	M1	turquoise	0.349041	0.166117	0.370501	0.404026	0.51557	0.500674	0.0481878	0.252514	0.350214	0.27144	0.0171697	-0.224944	-0.196527	-0.0764706	-0.42044	-0.184573	-0.023849	-0.282024	-0.0414811	-0.495983	-0.274555	-0.369885	-0.639365	0.141581	0.264868	0.165418	-0.432692	0.215499	turquoise|0.5156
ANXA7|NP_001147.1	M1	turquoise	-0.173415	0.427615	0.341212	0.115718	0.505555	0.0825863	-0.436237	0.191072	0.22923	-0.0678333	-0.163481	-0.079134	-0.0400853	-0.168279	0.0520565	-0.563011	-0.236208	-0.305402	-0.185167	-0.614317	-0.59647	-0.505814	-0.368706	0.0467472	0.0797781	-0.173183	-0.424073	0.11002	turquoise|0.5056
RPS17|NP_001012.1	M1	turquoise	0.0208592	0.344378	0.46896	0.413923	0.504607	-0.0802929	-0.0629344	0.492604	0.145343	-0.208122	-0.123205	-0.387681	-0.353895	-0.273008	-0.499529	-0.329618	-0.604498	-0.517453	-0.482402	-0.431537	-0.37081	-0.481942	-0.489309	-0.148895	0.0883126	0.173911	-0.167053	-0.437652	turquoise|0.5046
PLCL1|NP_006217.3	M1	turquoise	-0.146236	-0.153472	0.503033	0.552976	0.503061	0.218863	0.00140314	0.30319	0.0856707	-0.0398041	0.198876	-0.653008	-0.583653	-0.34559	-0.54147	-0.141618	-0.487066	-0.260105	-0.262616	-0.193776	-0.341954	-0.305593	-0.505272	-0.123827	-0.0803989	0.0683543	0.281172	-0.0955337	turquoise|0.5031
IGLL5|NP_001171597.1	M1	turquoise	-0.314748	0.0635906	0.428022	0.285951	0.500214	-0.0221399	-0.189856	0.122313	0.146158	-0.0662987	0.189986	-0.254658	-0.462519	-0.312622	-0.37017	-0.399254	-0.285504	-0.0519355	0.152273	-0.458216	-0.197339	-0.374235	-0.503407	0.195319	0.167439	-0.101899	0.0215893	0.54468	turquoise|0.5002
FBXO2|NP_036300.2	M1	turquoise	0.214885	0.245723	0.604976	0.49438	0.493756	0.119727	0.389876	0.579084	0.290687	0.378117	-0.037117	-0.540457	-0.498534	-0.0624736	-0.522471	-0.035446	-0.224111	-0.667358	-0.26125	-0.437498	-0.340454	-0.524485	-0.791428	-0.0981132	0.277999	0.418741	-0.0745151	-0.278645	turquoise|0.4938
ACO2|NP_001089.1	M1	turquoise	0.230354	0.0933979	0.572713	0.275228	0.489994	0.546535	0.0339849	0.384766	0.00478047	-0.272804	-0.402849	-0.0629711	-0.648303	-0.644259	-0.833704	-0.424647	-0.506445	-0.518556	-0.462504	-0.0452974	-0.314003	-0.40088	-0.509029	-0.147311	-0.071424	0.548411	0.00350642	0.150128	turquoise|0.49
PGD|NP_002622.2	M1	turquoise	0.0147381	0.0158764	0.0744594	0.460846	0.482236	0.467445	0.0968191	0.365296	0.416961	0.0300965	0.0646906	-0.350533	-0.214638	-0.228099	-0.129487	0.0520891	-0.100856	-0.0837828	-0.297361	-0.428687	-0.218764	-0.341966	-0.400397	-0.0538059	-0.312633	-0.119682	-0.0349197	-0.0654367	turquoise|0.4822
CHL1|NP_006605.2	M1	turquoise	0.157948	-0.0497702	0.386624	0.410623	0.479193	0.198156	-0.0433742	0.224146	-0.0790235	-0.17671	0.0270028	-0.435804	-0.437188	-0.317628	-0.659456	-0.0942164	-0.485706	-0.334892	-0.336871	-0.365795	-0.257865	-0.255068	-0.526828	-0.246807	-0.021201	0.257947	-0.0340586	0.01729	turquoise|0.4792
PHGDH|NP_006614.2	M1	turquoise	0.299726	0.3042	0.561502	0.575062	0.477195	0.0699568	-0.107284	0.257053	0.103973	0.275227	0.214153	-0.677304	-0.114834	0.143218	-0.428462	-0.137312	-0.375792	-0.501104	-0.238187	-0.580464	-0.513315	-0.31429	-0.597251	-0.145216	0.351677	0.0517684	-0.404505	-0.420879	turquoise|0.4772
ARHGDIA|NP_001172006.1	M1	turquoise	-0.371552	-0.111598	0.506773	0.0364434	0.474394	-0.0369024	-0.622428	0.188608	0.0973181	-0.122981	0.0829564	-0.228744	-0.313048	-0.258913	-0.232083	-0.595803	-0.444503	-0.0742603	-0.0323216	-0.436107	-0.550815	-0.423169	-0.283027	0.504313	0.258212	-0.278357	-0.208835	0.323873	turquoise|0.4744
NCKAP1|NP_995314.1	M1	turquoise	0.14983	0.401243	-0.0159282	0.396776	0.472046	0.252706	0.0152793	-0.00786691	0.239572	-0.179555	0.0630655	-0.192749	0.0149415	-0.186466	0.124587	-0.110951	0.0252924	-0.313894	-0.403121	-0.284758	-0.355848	-0.292963	-0.340818	-0.54483	-0.346821	-0.159897	-0.245631	-0.0405408	turquoise|0.472
TMX3|NP_061895.3	M1	turquoise	0.0564202	0.0448021	0.355021	0.341975	0.469604	0.510628	0.425941	0.544424	0.593204	0.469721	0.0707753	-0.310174	-0.433641	-0.164044	-0.131592	0.0132008	0.182662	-0.349	-0.115177	-0.249209	-0.352242	-0.554723	-0.598401	0.29584	-0.0267578	0.0284131	-0.119931	0.119801	turquoise|0.4696
RPS2|NP_002943.2	M1	turquoise	0.322819	0.496716	-0.00308854	0.293291	0.467595	0.518449	0.0924161	0.25855	0.480034	0.273742	0.185468	-0.115524	0.0310983	0.0251822	0.0301546	0.0481438	0.232511	-0.188512	-0.134714	-0.423587	-0.311105	-0.38638	-0.419471	-0.173438	-0.218889	-0.271746	-0.71077	0.0305977	turquoise|0.4676
FAM49A|NP_110424.1	M1	turquoise	-0.0115348	0.031338	0.318955	0.242061	0.464436	0.248723	-0.131495	0.281455	0.395436	0.149832	-0.00607984	-0.0938273	-0.240194	-0.127749	-0.369077	-0.323206	-0.113766	0.016656	0.161059	-0.585445	-0.102719	-0.371361	-0.509845	0.480839	0.357796	0.0343929	-0.247259	0.401859	turquoise|0.4644
INPP5A|NP_005530.3	M1	turquoise	-0.0358946	0.156677	0.159528	0.136245	0.462801	0.418904	0.110981	0.380846	0.237976	-0.199897	-0.126634	-0.0432302	-0.383051	-0.520735	-0.121912	-0.0772727	-0.118057	-0.299338	-0.461502	-0.313688	-0.366529	-0.508029	-0.328121	-0.021779	-0.519505	-0.118472	-0.160485	0.275053	turquoise|0.4628
CDH2|NP_001783.2	M1	turquoise	-0.495371	-0.0291886	0.267404	0.234567	0.460863	0.0546292	-0.0397832	0.301217	0.345988	-0.0122835	0.191938	-0.323534	-0.461795	-0.342922	-0.101848	-0.285554	-0.236306	-0.00318999	-0.0182266	-0.339569	-0.321027	-0.453139	-0.327183	0.281662	-0.162888	-0.291527	0.102164	0.236852	turquoise|0.4609
SND1|NP_055205.2	M1	turquoise	-0.308964	-0.111606	0.497013	-0.0138608	0.453034	0.319432	-0.182224	0.468138	0.259733	-0.0509984	-0.244376	0.0503204	-0.727184	-0.519972	-0.597018	-0.555129	-0.365673	-0.0527718	0.0391715	-0.0951381	-0.196307	-0.467353	-0.393331	0.378371	0.109883	0.228443	0.124875	0.444882	turquoise|0.453
PRNP|NP_001073590.1	M1	turquoise	-0.237029	0.175117	-0.010142	0.0989459	0.449723	0.203133	-0.257613	0.0657845	0.122389	-0.395967	-0.032955	-0.0930987	-0.0654648	-0.42554	0.254071	-0.21125	-0.164686	-0.167802	-0.478776	-0.429433	-0.547723	-0.399788	-0.128247	-0.16835	-0.605444	-0.427322	-0.205205	0.203808	turquoise|0.4497
TPP1|NP_000382.3	M1	turquoise	0.507818	0.603278	0.284279	0.477806	0.44876	0.187661	-0.0320689	0.305565	0.213781	0.0507961	0.128319	-0.29771	0.0359535	0.0773607	-0.305158	-0.0261095	-0.154001	-0.518838	-0.402934	-0.408013	-0.261468	-0.354935	-0.508461	-0.333982	0.151267	-0.0471254	-0.691451	-0.412896	turquoise|0.4488
AP2M1|NP_004059.2	M1	turquoise	-0.104728	0.452087	0.179993	0.0501696	0.43725	0.334647	0.141057	0.372224	0.264066	-0.142634	-0.484555	0.0409264	-0.18305	-0.402508	0.111128	-0.284056	-0.104749	-0.588425	-0.560992	-0.335204	-0.537542	-0.620026	-0.391886	-0.27274	-0.395908	0.157654	-0.241269	-0.12306	turquoise|0.4373
DPYSL4|NP_006417.2	M1	turquoise	0.604527	0.563363	0.199228	0.5116	0.435049	0.4916	-0.257224	-0.0456151	0.144478	0.111256	0.353304	-0.273377	0.213683	0.128257	-0.226762	-0.0373923	-0.0241689	-0.235626	-0.206908	-0.412071	-0.321232	-0.148985	-0.366461	-0.338044	0.0214142	-0.339977	-0.832943	-0.0833598	turquoise|0.435
ASAH1|NP_004306.3	M1	turquoise	-0.283629	0.171287	0.422056	0.0652666	0.426569	0.0557568	-0.0187791	0.226661	0.151928	-0.334623	-0.367	0.0915813	-0.490643	-0.635619	-0.257529	-0.664981	-0.339996	-0.33671	-0.219602	-0.242997	-0.409005	-0.495793	-0.327098	0.234323	-0.0659766	0.195642	0.102134	0.455319	turquoise|0.4266
CAPNS1|NP_001740.1	M1	turquoise	0.106094	0.283269	0.378047	0.233886	0.421303	0.221529	-0.184486	0.121675	0.00612185	-0.337925	-0.166242	0.0100063	-0.281275	-0.4897	-0.426759	-0.45544	-0.3843	-0.282828	-0.262509	-0.405763	-0.334697	-0.332918	-0.307526	0.0646519	-0.0831571	0.0393508	-0.238943	0.396885	turquoise|0.4213
RPL10|NP_006004.2	M1	turquoise	0.145139	0.446565	0.0848194	-0.0340346	0.418564	0.563272	-0.0858075	0.127525	0.109232	-0.286936	-0.549418	0.283468	-0.119843	-0.475044	-0.0404686	-0.356029	-0.0945551	-0.395235	-0.50212	-0.308025	-0.446995	-0.418561	-0.260313	-0.417754	-0.479217	0.180407	-0.32317	0.229152	turquoise|0.4186
EIF3B|NP_001032360.1	M1	turquoise	-0.252311	0.185858	0.0292616	0.252393	0.418302	0.279002	-0.140253	0.136971	0.0736851	-0.633107	-0.12104	-0.0775023	-0.20046	-0.61881	0.0055145	-0.22834	-0.34225	-0.195581	-0.60348	-0.130532	-0.322933	-0.346487	-0.122611	-0.319855	-0.676579	-0.24118	0.0420128	-0.00415372	turquoise|0.4183
CTNND2|NP_001323.1	M1	turquoise	-0.0820264	0.0695287	0.162471	0.358564	0.415916	-0.00216872	0.0333197	0.400356	0.321615	-0.344945	-0.181294	-0.209414	-0.253242	-0.406187	-0.133505	-0.24438	-0.361946	-0.246957	-0.517157	-0.379161	-0.265273	-0.395462	-0.232998	0.09172	-0.198897	-0.0166542	0.137895	-0.172461	turquoise|0.4159
PPA2|NP_008834.3	M1	turquoise	0.116549	-0.0685645	0.29855	0.465202	0.412955	0.321418	0.515043	0.481876	0.32462	0.0606253	-0.100803	-0.445494	-0.541692	-0.358147	-0.281926	0.0106819	-0.137392	-0.55296	-0.520262	0.0828437	-0.364113	-0.396946	-0.475042	-0.251617	-0.252005	0.360211	0.302082	-0.331799	turquoise|0.413
UBA1|NP_003325.2	M1	turquoise	-0.460589	0.319286	0.281243	0.113202	0.399525	-0.173875	-0.0200466	0.390131	0.119402	-0.202134	-0.100796	-0.213242	-0.44182	-0.39942	-0.169338	-0.376293	-0.455788	-0.309255	-0.211402	-0.311106	-0.415181	-0.506408	-0.312507	-0.132167	-0.25141	-0.00108968	-0.0163767	-0.112812	turquoise|0.3995
RPL26L1|NP_057177.1	M1	turquoise	0.134872	0.436154	-0.048191	0.505066	0.394905	0.231212	0.061496	0.0397485	0.250529	-0.00352334	0.448841	-0.311542	-0.0935224	-0.128966	-0.0149137	0.111588	0.0128848	0.0211358	-0.111264	-0.370894	-0.179774	-0.155261	-0.216206	-0.417844	-0.508392	-0.48995	-0.212917	0.132187	turquoise|0.3949
RPL31|NP_000984.1	M1	turquoise	-7.77e-05	-0.116426	0.251569	0.312479	0.394022	0.492672	-0.0609602	0.229653	0.355023	0.0946554	0.0639753	-0.222849	-0.329168	-0.252673	-0.206687	-0.186362	-0.0804255	-0.00449305	-0.129191	-0.0981909	-0.267752	-0.245765	-0.254085	0.131559	-0.125714	-0.105086	0.107339	0.152314	turquoise|0.394
TLN1|NP_006280.3	M1	turquoise	-0.668702	-0.233312	0.313205	0.186979	0.393223	-0.105616	-0.0317434	0.302006	0.128226	-0.291533	0.0504734	-0.410217	-0.540929	-0.534253	-0.00575772	-0.319825	-0.40626	-0.237969	-0.316029	-0.0613262	-0.503503	-0.46059	-0.230679	0.142914	-0.319773	-0.161064	0.396647	0.00676779	turquoise|0.3932
CDC42|NP_001034891.1	M1	turquoise	0.0220336	0.152184	-0.103473	0.253756	0.389605	0.28863	-0.0644733	0.153375	0.354549	0.0211752	0.26398	-0.274005	0.145982	-0.0315586	0.325699	0.125049	0.112148	-0.0879363	-0.329513	-0.468404	-0.413885	-0.328461	-0.195409	0.0100762	-0.383474	-0.55578	-0.46057	-0.0549862	turquoise|0.3896
PRPS1|NP_002755.1	M1	turquoise	0.0680455	0.304485	0.203466	0.331598	0.384694	0.552696	0.36117	0.367596	0.251912	-0.0398935	-0.219613	-0.0972474	-0.400434	-0.384875	-0.283176	0.0125309	-0.0647732	-0.390411	-0.395364	-0.023656	-0.0772265	-0.393448	-0.471277	-0.451497	-0.373363	0.259761	0.0831572	-0.0997535	turquoise|0.3847
OPALIN|NP_149984.1	M1	turquoise	0.154632	0.397676	0.174378	0.548731	0.380185	0.0998984	0.374329	0.480576	0.504312	0.18303	0.159937	-0.384719	-0.119293	-0.0471493	-0.0963438	0.0137371	-0.0510868	-0.348906	-0.238728	-0.380657	-0.23846	-0.410522	-0.42863	0.0681338	-0.0387817	-0.0899511	-0.285605	-0.372336	turquoise|0.3802
HEBP1|NP_057071.2	M1	turquoise	-0.418658	0.135675	0.2884	0.25567	0.37162	-0.182076	0.00560722	0.185405	-0.136847	-0.454479	0.0288671	-0.35971	-0.484062	-0.550749	-0.199834	-0.250155	-0.527825	-0.376133	-0.398932	-0.164545	-0.414671	-0.364708	-0.266288	-0.315049	-0.43011	-0.0429834	0.217883	-0.0100725	turquoise|0.3716
SOD1|NP_000445.1	M1	turquoise	-0.0983833	0.31642	0.194406	0.119053	0.369385	0.0620007	-0.663228	-0.235603	0.00949816	0.0214872	0.375163	-0.132251	0.0641565	0.027421	-0.0122074	-0.38831	-0.130594	0.167377	0.247989	-0.520791	-0.390669	-0.125439	-0.151333	-0.0122225	0.0567317	-0.561101	-0.498829	0.484334	turquoise|0.3694
SIRT2|NP_036369.2	M1	turquoise	-0.294089	-0.164521	0.395749	0.499982	0.367869	0.0292315	-0.0177176	0.18874	0.116318	0.0939187	0.505275	-0.637188	-0.506681	-0.185459	-0.353842	-0.0658067	-0.298799	-0.0128579	0.0740182	-0.0911806	-0.200956	-0.183551	-0.366514	0.0466401	-0.0107231	-0.218888	0.2847	0.0711584	turquoise|0.3679
RPL11|NP_000966.2	M1	turquoise	-0.0751811	0.306928	-0.0819818	0.146584	0.366345	0.429725	-0.00280235	0.266092	0.323817	-0.0678457	0.0801582	0.000388964	-0.233114	-0.316365	-0.00694678	0.0191052	-0.0133486	0.105353	-0.184109	-0.287756	-0.156121	-0.295603	-0.117847	-0.208535	-0.6512	-0.381239	-0.14746	0.216685	turquoise|0.3663
DCTN1|NP_001177766.1	M1	turquoise	-0.0211872	-0.09057	0.182679	-0.0727844	0.363795	0.538249	-0.0500659	0.269788	0.344001	0.225315	-0.152711	0.204087	-0.52264	-0.288746	-0.417818	-0.24189	0.0594579	0.204003	0.269057	-0.211909	0.00645891	-0.271154	-0.333606	0.218637	-0.014222	0.164208	0.0257943	0.739237	turquoise|0.3638
|NP_001035123.1	M1	turquoise	-0.137724	-0.0934462	0.400124	0.087321	0.362785	0.211168	-0.0878631	0.326963	-0.0344939	-0.467026	-0.428782	0.0662474	-0.670236	-0.697906	-0.691765	-0.505326	-0.565809	-0.236326	-0.299301	0.0347032	-0.129513	-0.309032	-0.288302	-0.0199724	-0.0914336	0.475585	0.310848	0.246122	turquoise|0.3628
ANXA1|NP_000691.1	M1	turquoise	-0.218706	-0.382227	0.380737	0.325191	0.358883	0.179426	0.149729	0.364155	0.278401	-0.019526	-0.0863555	-0.363935	-0.503985	-0.380302	-0.269405	-0.180286	-0.257687	-0.178118	-0.243543	-0.168634	-0.254656	-0.337454	-0.351027	0.365965	0.0055549	0.152386	0.46248	0.0821097	turquoise|0.3589
SIRT3|NP_036371.1	M1	turquoise	-0.264147	-0.0360745	0.443244	0.153896	0.354762	0.192178	-0.295423	0.25397	-0.0249552	-0.249391	-0.126488	-0.12662	-0.492144	-0.425748	-0.602465	-0.41647	-0.554185	-0.0565835	-0.0866766	-0.152399	-0.117576	-0.268213	-0.303309	0.0889917	0.0544967	0.141913	0.123003	0.152903	turquoise|0.3548
KCTD12|NP_612453.1	M1	turquoise	0.0388826	0.31766	-0.12283	0.33022	0.354005	0.0250756	0.224885	0.318934	0.524331	-0.0972682	0.0571821	-0.143033	-0.0616392	-0.174606	0.217019	-0.080408	0.051522	-0.198693	-0.362428	-0.15963	-0.271844	-0.350111	-0.146348	-0.146391	-0.352222	-0.226366	-0.123349	-0.279325	turquoise|0.354
SNX1|NP_683758.1	M1	turquoise	0.160072	0.122429	0.25046	0.28137	0.352957	0.246284	0.253993	0.355406	0.297267	0.438718	0.354026	-0.354569	-0.502139	-0.0230732	-0.341774	0.12555	0.0648591	-0.140204	0.0802283	-0.0678926	-0.187577	-0.255521	-0.415717	-0.17466	-0.0908341	-0.036211	-0.0800105	0.109148	turquoise|0.353
C12orf5|NP_065108.1	M1	turquoise	-0.289433	-0.0796799	0.427927	0.14681	0.350424	0.137639	-0.218762	0.145926	0.0109987	-0.180658	0.014065	-0.310665	-0.331902	-0.351645	-0.0726616	-0.339306	-0.319787	-0.351202	-0.37379	0.0303622	-0.561331	-0.360238	-0.218238	0.025705	-0.123352	-0.134316	0.0780965	-0.0431029	turquoise|0.3504
MAPRE3|NP_036458.2	M1	turquoise	-0.16505	0.18071	0.0361767	0.256247	0.345621	0.151599	0.204418	0.412302	0.482	0.294214	0.335648	-0.246506	-0.319595	-0.0519649	-0.0205411	0.204515	0.114537	0.131333	0.0854392	-0.411806	0.00429709	-0.340306	-0.313243	0.0901366	-0.262866	-0.390559	-0.0248678	0.187215	turquoise|0.3456
TJP2|NP_004808.2	M1	turquoise	-0.0209873	-0.119665	0.334508	0.535845	0.342018	0.198171	-0.0706889	0.043143	-0.0895417	-0.122065	0.342873	-0.603795	-0.276774	-0.212184	-0.418268	0.0236633	-0.408616	-0.119293	-0.226762	-0.190339	-0.232399	-0.0836662	-0.321548	-0.14835	-0.131816	-0.120422	0.114813	-0.0878881	turquoise|0.342
OGDH|NP_002532.2	M1	turquoise	-0.415417	0.00369538	0.564593	0.147862	0.336864	-0.302408	-0.473942	0.0791873	-0.0812626	-0.236555	0.0573733	-0.209108	-0.434799	-0.295015	-0.487473	-0.667704	-0.59499	-0.0625709	0.142795	-0.234555	-0.234305	-0.249018	-0.277755	0.273605	0.40646	0.0105246	0.120357	0.271497	turquoise|0.3369
EPS15L1|NP_067058.1	M1	turquoise	0.156756	0.0831041	0.0717307	0.316767	0.335694	0.287221	0.0571991	-0.103166	0.0842106	-0.125289	-0.0425475	-0.165061	-0.0105285	-0.171072	0.0333187	-0.0120838	0.0493644	-0.265844	-0.322575	-0.278433	-0.206635	-0.180777	-0.33965	-0.32793	-0.168208	0.0302869	-0.00336499	0.150834	turquoise|0.3357
RAC1|NP_061485.1	M1	turquoise	0.0423289	0.157576	-0.0111094	0.317483	0.333157	0.393516	0.109736	0.20289	0.453931	0.106166	0.227409	-0.202431	0.0324281	-0.100924	0.294616	0.122869	0.218326	-0.0831699	-0.271634	-0.300287	-0.295694	-0.32338	-0.184383	0.127048	-0.36528	-0.50826	-0.234993	0.0553542	turquoise|0.3332
AHCYL1|NP_006612.2	M1	turquoise	-0.0605419	0.340124	0.303834	0.107254	0.329124	0.120627	-0.240421	-0.0445991	-0.0338285	-0.0746208	-0.156161	-0.15	0.0687551	-0.126789	0.123212	-0.368851	-0.16956	-0.460997	-0.294244	-0.397848	-0.619769	-0.346631	-0.294389	-0.167598	-0.0249029	-0.0485496	-0.358813	-0.0122743	turquoise|0.3291
ANXA11|NP_001148.1	M1	turquoise	-0.332067	-0.0643944	0.285716	0.230179	0.321594	0.242377	0.280725	0.431938	0.279045	0.0378372	-0.00348537	-0.165258	-0.650861	-0.413368	-0.412611	-0.0968833	-0.174532	-0.0394618	0.040444	-0.0315711	0.0562433	-0.352097	-0.405581	0.126353	-0.137179	0.152607	0.351554	0.227504	turquoise|0.3216
DIS3|NP_055768.3	M1	turquoise	-0.259114	-0.063341	0.414145	0.310073	0.320145	0.0412235	-0.234266	0.054721	0.177858	0.297124	0.309699	-0.376424	-0.275668	0.0319632	-0.248884	-0.255204	-0.140894	0.120062	0.372567	-0.362799	-0.13751	-0.162683	-0.384658	0.268653	0.361466	-0.146554	0.106637	0.321614	turquoise|0.3201
CNTN1|NP_001834.2	M1	turquoise	-0.47551	0.0900909	0.0216779	-0.0865278	0.312232	0.1229	0.104462	0.284448	0.314621	-0.191258	-0.319025	0.0867947	-0.232479	-0.490206	0.322183	-0.343865	-0.0431563	-0.215625	-0.264887	-0.267453	-0.493445	-0.519619	-0.13682	0.205788	-0.467923	-0.091727	0.0201094	0.226014	turquoise|0.3122
RRM2|NP_001025.1	M12	tan	0.213436	0.0593114	-0.573352	-0.236557	-0.610292	-0.387104	0.0752899	-0.366272	0.0169523	0.632452	0.505232	0.114408	0.743989	0.94653	0.627809	0.636945	0.688967	0.575235	0.676567	0.0926739	0.529885	0.574205	0.486442	0.0818226	0.29285	-0.43572	-0.241169	-0.207343	tan|0.9465
KPNA2|NP_002257.1	M12	tan	0.321278	0.146837	-0.483707	-0.0815307	-0.544878	-0.436498	0.00202514	-0.372059	-0.0405443	0.54193	0.558849	0.00602151	0.720628	0.930556	0.422928	0.532458	0.5026	0.50218	0.625006	0.103202	0.492908	0.602041	0.436287	-0.0379881	0.378505	-0.374264	-0.309737	-0.360419	tan|0.9306
PTBP1|NP_114368.1	M12	tan	0.411806	0.0155976	-0.580556	-0.234259	-0.596725	-0.271625	0.159253	-0.235951	0.0981148	0.637255	0.411815	0.177285	0.625388	0.896929	0.45093	0.626224	0.677966	0.538581	0.585901	0.297151	0.566867	0.589862	0.503185	0.0181241	0.287513	-0.254404	-0.208866	-0.321593	tan|0.8969
DPP6|NP_001927.3	M12	tan	0.155418	-0.0271649	-0.612894	-0.284803	-0.605141	-0.237941	0.0120797	-0.398026	-0.02423	0.582008	0.531394	0.142428	0.70605	0.883698	0.617934	0.673678	0.698057	0.649117	0.666745	0.208084	0.55428	0.59663	0.517022	0.0237539	0.171406	-0.488088	-0.221873	-0.146976	tan|0.8837
DSTN|NP_006861.1	M12	tan	0.258365	-0.0179056	-0.353877	0.0168105	-0.32788	-0.204781	-0.0917889	-0.341653	0.0588081	0.660656	0.713877	-0.162883	0.581616	0.88012	0.33378	0.524389	0.517089	0.552155	0.684243	-0.0774548	0.362858	0.478323	0.218423	0.105367	0.397572	-0.492121	-0.360143	-0.100628	tan|0.8801
CMTM5|NP_001032365.1	M12	tan	0.394261	0.0533426	-0.404557	-0.0612494	-0.639276	-0.295154	0.155894	-0.392816	-0.153873	0.53737	0.440328	0.0385726	0.613366	0.855398	0.294888	0.647374	0.514331	0.445531	0.557686	0.285215	0.645283	0.682968	0.432174	-0.137425	0.343495	-0.173308	-0.0331678	-0.333126	tan|0.8554
SLC32A1|NP_542119.1	M12	tan	0.475965	-0.00196862	-0.608795	-0.137392	-0.532739	-0.207143	0.410521	-0.113653	0.181284	0.657928	0.295631	0.133418	0.571883	0.850298	0.402647	0.772574	0.715973	0.433998	0.47645	0.128739	0.649017	0.502578	0.327671	-0.0190429	0.243031	-0.0702309	-0.132902	-0.340227	tan|0.8503
TOMM6|NP_001127965.1	M12	tan	0.318477	0.324245	-0.4271	0.00283925	-0.348344	-0.198403	0.139761	-0.266899	0.111057	0.63799	0.455314	-0.0526979	0.656116	0.850295	0.542801	0.570057	0.609213	0.291449	0.439527	-0.0830293	0.304069	0.369078	0.209984	-0.244728	0.169493	-0.367354	-0.345857	-0.338678	tan|0.8503
CCT5|NP_036205.1	M12	tan	0.289456	0.0978697	-0.507753	0.0102007	-0.493023	-0.329449	-0.09042	-0.558729	-0.126065	0.335732	0.54451	-0.0625633	0.882994	0.846706	0.599111	0.511809	0.486199	0.41185	0.398123	0.0776207	0.35235	0.60237	0.443261	-0.127008	0.247611	-0.483632	-0.312537	-0.385203	tan|0.8467
PIP4K2C|NP_001139731.1	M12	tan	0.359727	0.0965457	-0.444458	-0.146086	-0.62603	-0.343382	-0.158287	-0.616697	-0.275832	0.314935	0.407642	0.135086	0.883114	0.842407	0.466947	0.430443	0.456162	0.450587	0.506043	0.156471	0.46418	0.706651	0.530665	-0.0164182	0.398749	-0.33828	-0.310897	-0.225917	tan|0.8424
ERLIN2|NP_009106.1	M12	tan	0.34747	-0.0486551	-0.664595	-0.297694	-0.706954	-0.188595	0.402762	-0.260095	0.0857509	0.655154	0.232036	0.303222	0.604365	0.839883	0.523226	0.759874	0.812571	0.558885	0.609106	0.343858	0.759233	0.623076	0.502484	-0.0113735	0.18925	-0.0742838	0.0405728	-0.216536	tan|0.8399
MPI|NP_002426.1	M12	tan	0.420614	-0.0736393	-0.290537	-0.210356	-0.580502	-0.23793	-0.129157	-0.486361	-0.218658	0.517247	0.375409	0.138148	0.647719	0.82938	0.208687	0.370669	0.448792	0.462646	0.661796	0.204922	0.450075	0.66033	0.419098	0.158339	0.57663	-0.140935	-0.281191	-0.0743978	tan|0.8294
SYN3|NP_001129246.1	M12	tan	0.336904	0.14234	-0.507776	-0.412493	-0.586757	-0.279844	-0.127162	-0.454532	-0.19679	0.426529	0.237356	0.312568	0.747424	0.817732	0.483895	0.413736	0.544444	0.407178	0.52207	0.194809	0.388446	0.567473	0.503583	-0.124168	0.29181	-0.212693	-0.418993	-0.180224	tan|0.8177
GMPS|NP_003866.1	M12	tan	0.130068	0.0748243	-0.45119	-0.500342	-0.648295	-0.403356	-0.126735	-0.428064	-0.18552	0.480732	0.19797	0.36947	0.658441	0.805379	0.462009	0.320546	0.519842	0.515641	0.725988	0.189224	0.478648	0.562433	0.520516	0.0850077	0.418395	-0.165962	-0.263617	-0.0517524	tan|0.8054
NECAB2|NP_061938.2	M12	tan	0.357611	0.0947187	-0.652549	-0.111558	-0.524953	-0.288769	-0.0864342	-0.492993	-0.0342037	0.304778	0.588714	0.1454	0.842441	0.797997	0.614619	0.600892	0.619746	0.592694	0.455579	0.117354	0.510958	0.620454	0.564026	-0.0120416	0.124418	-0.634695	-0.363038	-0.141055	tan|0.798
SLC2A13|NP_443117.3	M12	tan	0.0717026	-0.011959	-0.498918	-0.330679	-0.575236	-0.337373	-0.0912981	-0.36402	-0.0759548	0.429896	0.330142	0.254972	0.664929	0.794202	0.440942	0.477974	0.520515	0.631538	0.6874	0.0735215	0.652314	0.537307	0.435488	0.171926	0.388209	-0.30752	-0.19823	-0.0682141	tan|0.7942
RBBP7|NP_001185648.1	M12	tan	0.192496	-0.180635	-0.407566	-0.225369	-0.56915	-0.4982	0.276236	-0.048861	0.0849647	0.619702	0.337886	0.016198	0.373079	0.793898	0.328037	0.586258	0.490164	0.42151	0.531003	0.270501	0.527985	0.472409	0.399611	0.181358	0.390527	-0.0784835	0.0886104	-0.403546	tan|0.7939
SDPR|NP_004648.1	M12	tan	0.21215	0.288089	-0.380078	0.0205891	-0.249962	-0.240391	0.0977498	-0.14732	0.316171	0.666925	0.520503	0.0159985	0.530967	0.792473	0.385244	0.43341	0.576542	0.514272	0.667603	-0.26837	0.442308	0.283632	0.138941	0.160023	0.339578	-0.449529	-0.368555	-0.0602001	tan|0.7925
PSMC1|NP_002793.2	M12	tan	0.453447	0.148466	-0.472759	0.128121	-0.404417	-0.173449	-0.108503	-0.546283	-0.141473	0.268112	0.690011	-0.124988	0.835241	0.785873	0.493912	0.610102	0.482084	0.355252	0.252287	0.130776	0.344739	0.585407	0.395001	-0.247927	0.132095	-0.615399	-0.424977	-0.358008	tan|0.7859
HSPH1|NP_006635.2	M12	tan	0.456536	0.143616	-0.28426	-0.0639297	-0.502784	-0.195024	-0.0682772	-0.432451	-0.0876253	0.410199	0.313596	0.168394	0.723644	0.776679	0.304225	0.347354	0.485284	0.336924	0.481222	0.160924	0.482253	0.549646	0.349435	0.0773207	0.533376	-0.201983	-0.305396	-0.188791	tan|0.7767
RBBP4|NP_001128727.1	M12	tan	0.446929	0.0712847	-0.271774	-0.191063	-0.436217	-0.216014	0.328873	0.0390796	0.139295	0.778837	0.251863	0.0768611	0.278973	0.77435	0.136595	0.527367	0.539092	0.239444	0.513841	0.222715	0.420832	0.358633	0.202966	0.00157867	0.399048	0.0754217	-0.164043	-0.32576	tan|0.7744
NDUFS8|NP_002487.1	M12	tan	0.475876	0.0406679	-0.301423	0.310549	-0.296157	-0.341274	-0.164755	-0.510165	-0.201043	0.247367	0.770045	-0.35347	0.661912	0.764004	0.174787	0.521364	0.22499	0.35067	0.301714	-0.0291421	0.331884	0.606639	0.255168	-0.231369	0.32544	-0.475603	-0.28679	-0.362884	tan|0.764
DBNL|NP_001116428.1	M12	tan	0.372906	0.225198	0.0216555	0.336676	-0.161994	-0.40874	0.0992209	-0.181158	-0.0256488	0.565291	0.580567	-0.446085	0.447896	0.761991	0.0598027	0.355908	0.192777	-0.000950176	0.394124	-0.29615	0.129099	0.260657	-0.121081	0.00198481	0.608065	-0.163659	-0.386705	-0.394635	tan|0.762
NLN|NP_065777.1	M12	tan	0.29582	0.344996	-0.262739	0.277649	-0.19156	-0.329782	0.111818	-0.18645	0.105725	0.465785	0.735446	-0.311431	0.593748	0.757697	0.366524	0.588475	0.403486	0.199822	0.317781	-0.274381	0.284109	0.249162	0.0480867	-0.0417943	0.250853	-0.596089	-0.484896	-0.348277	tan|0.7577
HNRNPF|NP_001091675.1	M12	tan	0.419949	-0.196432	-0.336611	-0.281925	-0.669658	-0.173513	0.111836	-0.304193	-0.173178	0.522339	0.1838	0.177333	0.510241	0.756315	0.210817	0.514442	0.475212	0.378907	0.469624	0.470243	0.528023	0.648737	0.485557	0.0566958	0.418833	0.0628699	0.0038436	-0.316274	tan|0.7563
DMXL2|NP_001167587.1	M12	tan	0.306006	-0.0238228	-0.340638	0.190872	-0.335106	-0.375253	0.218243	-0.225475	0.102239	0.482616	0.675082	-0.241609	0.538732	0.753227	0.348699	0.621235	0.491064	0.32339	0.426498	-0.0396562	0.427254	0.401188	0.161064	0.168061	0.371596	-0.40516	-0.203188	-0.251491	tan|0.7532
LLGL1|NP_004131.3	M12	tan	0.471395	0.0856812	-0.364121	0.0825388	-0.397481	-0.000397044	0.159027	-0.296723	0.0512934	0.563662	0.453088	-0.00178855	0.606395	0.751892	0.372931	0.599748	0.648299	0.278981	0.444096	0.154607	0.445097	0.457887	0.190877	-0.0963187	0.290304	-0.241489	-0.263598	-0.192753	tan|0.7519
ERMN|NP_065762.1	M12	tan	0.427628	0.247496	-0.140883	0.143269	-0.261699	-0.203766	-0.153577	-0.255235	-0.0187332	0.517248	0.637318	-0.142227	0.485386	0.746187	0.0341091	0.356107	0.270561	0.39148	0.550841	-0.120732	0.3268	0.429703	0.17528	0.0388108	0.438341	-0.42035	-0.455874	-0.15241	tan|0.7462
PIP4K2A|NP_005019.2	M12	tan	0.106357	0.0166162	-0.135408	0.162495	-0.319129	-0.49463	-0.311398	-0.498864	-0.196679	0.364918	0.739972	-0.324481	0.521285	0.740437	0.200386	0.238891	0.140523	0.452863	0.597278	-0.0348631	0.229741	0.543025	0.282142	0.00843463	0.474573	-0.493227	-0.146019	-0.196928	tan|0.7404
PTGES3|NP_006592.3	M12	tan	0.44714	0.205046	-0.0581308	-0.0673838	-0.255636	-0.00267935	0.144656	-0.0686515	0.12199	0.771181	0.220342	0.0317776	0.32539	0.73611	0.0711387	0.340364	0.489967	0.116019	0.497282	0.0284679	0.286953	0.237557	-0.0279234	-0.0220237	0.539023	0.0633309	-0.331982	-0.184064	tan|0.7361
AKAP12|NP_005091.2	M12	tan	0.13785	-0.0826822	-0.331429	0.0244228	-0.60766	-0.575968	0.22459	-0.349494	-0.285237	0.339937	0.562433	-0.187726	0.514667	0.735854	0.242673	0.65923	0.298677	0.326874	0.481514	0.232899	0.59877	0.601045	0.33702	-0.0127523	0.363621	-0.188087	0.034966	-0.413892	tan|0.7359
ILF3|NP_004507.2	M12	tan	0.172422	-0.12263	-0.205662	0.195242	-0.343634	-0.504681	-0.0565189	-0.466856	-0.1279	0.359681	0.740782	-0.299486	0.493499	0.733404	0.186257	0.411153	0.287498	0.423604	0.577109	0.0215879	0.435264	0.534755	0.187278	0.109069	0.547774	-0.372717	-0.0582732	-0.132601	tan|0.7334
RPLP2|NP_000995.1	M12	tan	0.531929	0.150522	-0.262684	0.11708	-0.396637	-0.0312763	0.565843	-0.111226	0.06906	0.730026	0.312635	-0.10938	0.382134	0.732024	0.1994	0.72921	0.610999	0.0639968	0.351054	0.149308	0.452339	0.376132	0.0307865	-0.254103	0.246464	0.0994017	-0.0823565	-0.373628	tan|0.732
NDUFV1|NP_001159574.1	M12	tan	0.526101	0.300058	-0.366355	0.180134	-0.172532	-0.173377	0.0424173	-0.26954	0.184008	0.441149	0.485203	-0.0442943	0.595692	0.725093	0.256185	0.367289	0.480129	0.27747	0.394185	-0.124454	0.326077	0.347888	0.0918543	-0.150043	0.351036	-0.286348	-0.475973	-0.220262	tan|0.7251
S100B|NP_006263.1	M12	tan	0.071455	-0.0472336	-0.190084	0.0863131	-0.250297	-0.414829	0.110705	-0.0784754	0.17336	0.59619	0.469165	-0.266727	0.330978	0.721357	0.30864	0.424617	0.357661	0.31823	0.459473	-0.109802	0.298008	0.278406	0.0998302	0.112121	0.412847	-0.253127	0.0487968	-0.308926	tan|0.7214
HNRNPC|NP_001070910.1	M12	tan	0.363701	0.0527429	-0.252295	-0.037711	-0.378599	0.0556519	0.401779	-0.177397	0.124165	0.780747	0.274256	0.0360567	0.345277	0.709526	0.234173	0.571418	0.677478	0.244847	0.559457	0.162533	0.471106	0.358773	0.0488814	-0.0782442	0.327612	0.0569495	-0.0604871	-0.098338	tan|0.7095
FGB|NP_001171670.1	M12	tan	0.178682	-0.112052	-0.183306	-0.0184997	-0.306597	-0.293235	-0.165437	-0.301254	-0.185708	0.373624	0.504143	-0.184078	0.432286	0.708511	0.10093	0.462629	0.229435	0.348942	0.427798	-0.00468211	0.404403	0.429985	0.131673	-0.0347586	0.460991	-0.238104	-0.176469	-0.220896	tan|0.7085
BLMH|NP_000377.1	M12	tan	0.363108	0.140184	-0.04736	0.314249	-0.209752	-0.421804	-0.278514	-0.418616	-0.279823	0.232981	0.680461	-0.490257	0.611393	0.707451	0.149959	0.308041	0.00513679	0.0751884	0.161095	-0.125858	-0.00786632	0.433046	0.161757	-0.189638	0.402045	-0.437806	-0.398698	-0.536442	tan|0.7075
RRAS|NP_006261.1	M12	tan	0.171243	0.229314	-0.407453	0.152599	-0.380499	-0.519144	0.00751931	-0.364592	-0.109953	0.246492	0.658348	-0.184121	0.618186	0.695589	0.364157	0.552123	0.278776	0.414646	0.397344	-0.13553	0.453869	0.4797	0.321037	-0.141708	0.148079	-0.548302	-0.204005	-0.308959	tan|0.6956
KCNJ10|NP_002232.2	M12	tan	0.455099	0.0749016	-0.299741	-0.0565266	-0.381398	-0.0501426	0.345577	-0.240573	0.0648451	0.591984	0.205068	0.0762913	0.427089	0.683403	0.227498	0.480489	0.591829	0.178013	0.40383	0.23887	0.418282	0.401194	0.122557	-0.154269	0.34376	0.114936	-0.116902	-0.237527	tan|0.6834
ACAA1|NP_001598.1	M12	tan	0.160259	0.171555	-0.0898703	0.128011	-0.300885	-0.670114	-0.0732914	-0.308213	-0.285904	0.250151	0.522936	-0.403965	0.534604	0.678397	0.311966	0.333355	0.0596218	-0.0482971	0.162621	-0.0987362	-0.00656731	0.32848	0.171052	-0.180052	0.35905	-0.304834	-0.269073	-0.572084	tan|0.6784
HMOX2|NP_002125.3	M12	tan	0.39282	-0.164167	-0.554482	-0.480381	-0.570838	0.00305697	0.308777	-0.0291682	0.176986	0.564611	-0.0947114	0.47156	0.454665	0.650644	0.379253	0.559774	0.714505	0.410149	0.393426	0.341125	0.591325	0.410922	0.421021	0.182026	0.233872	0.132677	-0.0781079	-0.176801	tan|0.6506
RER1|NP_008964.3	M12	tan	0.158379	-0.119058	-0.226815	-0.0839702	-0.452397	-0.311991	0.379584	0.0487031	0.109658	0.708775	0.387906	-0.0843702	0.155449	0.645898	0.108541	0.498056	0.413146	0.330072	0.625892	0.256733	0.431788	0.364336	0.209911	0.205833	0.356828	0.0064043	0.0536977	-0.271465	tan|0.6459
RAD23A|NP_005044.1	M12	tan	0.291138	0.461615	-0.0749502	0.147678	-0.196101	-0.209656	0.219701	-0.115136	0.071643	0.577687	0.281815	-0.157125	0.36136	0.636985	0.223278	0.301584	0.33941	-0.0352183	0.317021	-0.0737906	0.143128	0.185572	-0.0303972	-0.326718	0.284763	-0.0580686	-0.230103	-0.40499	tan|0.637
GET4|NP_057033.2	M12	tan	0.60707	0.0464083	-0.29347	-0.0220158	-0.29037	-0.119863	0.106933	-0.149531	0.0331979	0.366713	0.200445	0.0773011	0.510233	0.632422	0.0966596	0.382579	0.394795	0.120095	0.237561	0.0572554	0.338196	0.350357	0.124002	0.0170298	0.452661	0.0487162	-0.42636	-0.28431	tan|0.6324
C16orf58|NP_073581.2	M12	tan	0.33743	-0.122399	-0.482452	-0.24901	-0.624579	-0.0767516	0.242635	-0.415135	-0.0256819	0.385989	0.158433	0.335934	0.622682	0.621336	0.494451	0.480061	0.708235	0.370669	0.436922	0.466243	0.560334	0.558133	0.463977	0.1364	0.274691	-0.0686878	-0.0277852	-0.0705649	tan|0.6213
TMED4|NP_872353.2	M12	tan	0.129442	0.0460523	-0.457679	-0.0710605	-0.488167	-0.57054	0.258529	-0.257314	-0.0573476	0.260443	0.436939	0.00441413	0.496234	0.619193	0.409598	0.587936	0.410011	0.347499	0.36507	0.0683008	0.545687	0.429178	0.357653	0.0322621	0.177444	-0.30548	-0.0292325	-0.244856	tan|0.6192
GLRX3|NP_006532.2	M12	tan	0.0382048	-0.176067	-0.133806	-0.125674	-0.342489	-0.207999	-0.26027	-0.322406	-0.167379	0.375664	0.443096	-0.0680322	0.494026	0.613503	0.163241	0.267011	0.207452	0.440023	0.570274	-0.116071	0.269325	0.38468	0.213729	0.432991	0.496862	-0.336882	-0.329993	0.0234711	tan|0.6135
TBCD|NP_005984.3	M12	tan	0.416145	-0.0602515	-0.0813543	-0.0203578	-0.447198	-0.246463	0.0427229	-0.38593	-0.174714	0.322759	0.123468	0.0978673	0.49359	0.580963	0.0632052	0.16682	0.297835	0.130776	0.421724	0.190321	0.386607	0.474953	0.196253	0.181099	0.684088	0.171629	-0.0975322	-0.128051	tan|0.581
FAIM2|NP_036438.2	M12	tan	0.174973	0.145382	-0.0157081	0.105551	-0.238182	-0.296107	-0.0647997	-0.203825	-0.253538	0.238032	0.37949	-0.26829	0.488502	0.562211	0.15242	0.355904	0.0914183	-0.076777	0.149582	-0.097008	0.116375	0.215819	-7.85e-05	-0.062768	0.388114	-0.188882	-0.402473	-0.441255	tan|0.5622
LGALS1|NP_002296.1	M12	tan	0.119011	0.118197	-0.186535	0.216766	-0.0376861	-0.393507	-0.0535769	-0.0647882	0.109559	0.258893	0.551805	-0.342717	0.362588	0.513797	0.272765	0.322181	0.159245	0.112631	0.160922	-0.289008	0.066238	0.102774	0.0139519	-0.00693937	0.214088	-0.456975	-0.329709	-0.322103	tan|0.5138
CORO1B|NP_065174.1	M12	tan	0.156042	0.239819	-0.0751514	0.00960386	-0.137904	-0.0681852	-0.140086	-0.172384	-0.118418	0.376794	0.49464	-0.150588	0.147843	0.465927	-0.0171051	0.277974	0.144232	0.226493	0.354965	0.139185	0.153998	0.264792	0.0973774	-0.387134	0.0780155	-0.291204	-0.248362	-0.184609	tan|0.4659
MBP|NP_001020252.1	M13	salmon	0.324975	0.254734	0.0153828	0.686091	0.17432	-0.192511	0.0908229	-0.0103168	0.188395	0.307463	0.883313	-0.744468	0.24255	0.462457	0.0608674	0.406064	0.0674856	-0.063511	-0.0216702	-0.238136	-0.100754	0.0588644	-0.19523	-0.203759	0.104957	-0.586014	-0.371529	-0.526447	salmon|0.8833
ACIN1|NP_001158286.1	M13	salmon	-0.0407067	0.0349876	0.178549	0.482399	8.95e-05	-0.43059	-0.209937	-0.348317	-0.29047	0.0388608	0.851639	-0.67191	0.152204	0.322548	-0.0573708	0.168074	-0.184198	0.0388124	0.185948	-0.0266341	-0.0334311	0.243827	-0.0550029	-0.163054	0.25224	-0.502363	-0.0726185	-0.228306	salmon|0.8516
RAB37|NP_783865.1	M13	salmon	0.373476	0.332056	-0.155023	0.582469	0.101772	-0.107812	0.187104	0.029219	0.351681	0.400747	0.837668	-0.518758	0.345524	0.536562	0.191056	0.53016	0.303252	0.101739	0.0873983	-0.279704	0.122011	0.0674238	-0.132312	-0.0854174	0.0746764	-0.661931	-0.434915	-0.397336	salmon|0.8377
C4B|NP_001002029.3	M13	salmon	0.0278817	-0.0231601	-0.0172233	0.335607	0.0686049	-0.183573	-0.0255973	-0.0929792	0.252855	0.53637	0.799204	-0.462054	0.0770473	0.462412	0.12037	0.254439	0.258312	0.350862	0.505927	-0.220659	0.0397926	0.134667	-0.0810768	0.162968	0.229076	-0.552296	-0.0880632	0.0998064	salmon|0.7992
SNX2|NP_003091.2	M13	salmon	0.163728	-0.0545295	-0.122339	0.325254	-0.0568502	-0.0469086	0.0547908	-0.224149	-0.0383833	0.417642	0.794426	-0.496667	0.182226	0.495129	0.0716317	0.567564	0.249208	0.261208	0.310093	-0.0408608	0.183293	0.288784	-0.0516662	-0.232079	0.0465904	-0.450149	-0.0992435	-0.111847	salmon|0.7944
DDX1|NP_004930.1	M13	salmon	0.1624	0.0672474	-0.230565	0.360412	-0.124061	-0.179546	-0.0198694	-0.286098	0.088395	0.356978	0.778427	-0.383127	0.309982	0.551433	0.170463	0.389871	0.257782	0.405485	0.396096	0.0786238	0.26686	0.388436	0.133939	-0.221631	0.114322	-0.511537	-0.0430754	-0.248365	salmon|0.7784
STMN1|NP_981946.1	M13	salmon	0.236184	0.0292786	-0.339688	0.199253	-0.298583	-0.0867896	-0.0212839	-0.422683	0.0160937	0.438539	0.776994	-0.148037	0.467904	0.680362	0.183972	0.538202	0.45963	0.602573	0.630149	0.103372	0.573266	0.531735	0.201823	-0.0672577	0.245466	-0.513631	-0.147299	-0.00834136	salmon|0.777
AGFG1|NP_004495.2	M13	salmon	0.24182	0.367318	0.186534	0.527544	0.194872	-0.370157	-0.0751576	0.0626639	0.152704	0.362903	0.776743	-0.655115	0.120246	0.480087	-0.0459976	0.180298	-0.044856	-0.10546	0.0908588	-0.287853	-0.170104	-0.0195812	-0.219669	-0.158399	0.306073	-0.49992	-0.392572	-0.455082	salmon|0.7767
FASN|NP_004095.4	M13	salmon	0.274191	0.0980771	-0.23951	0.24376	-0.0237324	0.123005	-0.126654	-0.165436	0.162225	0.408713	0.767791	-0.214712	0.237476	0.467223	0.0419029	0.391137	0.317409	0.484568	0.451498	-0.0141785	0.24377	0.287721	0.0816374	-0.0970241	0.0222616	-0.592407	-0.355673	0.0344677	salmon|0.7678
RAB22A|NP_065724.1	M13	salmon	-0.178602	0.272272	0.0361042	0.220864	0.0422453	-0.403102	-0.153092	-0.0138603	0.185354	0.418965	0.760053	-0.420522	0.201468	0.433463	0.29297	0.0956904	0.106659	0.196566	0.425955	-0.350621	-0.178379	-0.0286879	-0.000316178	0.270524	0.174867	-0.752335	-0.396168	-0.0752902	salmon|0.7601
CYC1|NP_001907.2	M13	salmon	-0.010292	0.168672	-0.00347933	0.371968	-0.0447957	-0.331209	-0.121829	-0.116352	0.137311	0.375232	0.74157	-0.502062	0.351036	0.539219	0.279514	0.252976	0.109925	0.218881	0.279284	-0.251568	-0.00623069	0.147905	0.0559944	0.142719	0.233388	-0.682674	-0.207985	-0.326257	salmon|0.7416
INF2|NP_001026884.3	M13	salmon	0.492306	0.016297	-0.100477	0.460793	-0.202383	-0.111275	-0.0695073	-0.461073	-0.330393	0.0469426	0.737111	-0.402768	0.373313	0.428673	-0.170813	0.44505	0.0216143	0.197157	0.157506	0.152561	0.312757	0.551781	0.134341	-0.315435	0.174426	-0.325112	-0.169351	-0.244755	salmon|0.7371
DYNC1I2|NP_001369.1	M13	salmon	-0.153325	-0.0531242	0.0682206	0.287574	0.0659775	-0.301689	-0.381703	-0.242278	-0.127109	0.0169331	0.733561	-0.421652	0.0409493	0.214053	-0.159407	-0.00237215	-0.20133	0.354533	0.379343	-0.0966673	0.0575007	0.208135	0.0129428	0.0553796	0.214555	-0.512625	-0.111266	0.0511143	salmon|0.7336
CHMP4B|NP_789782.1	M13	salmon	0.0970211	0.306337	-0.444024	0.135382	-0.0750795	-0.297339	-0.209409	-0.311482	0.233808	0.321031	0.719209	-0.12399	0.617277	0.641143	0.561852	0.335417	0.441975	0.504109	0.435864	-0.361298	0.181999	0.238719	0.196728	-0.0148387	0.0674713	-0.836063	-0.474483	-0.0169218	salmon|0.7192
CD82|NP_001020015.1	M13	salmon	1.1e-06	-0.0945065	-0.361657	0.153415	-0.0639287	0.0348621	0.197048	0.0112925	0.403066	0.535604	0.717879	-0.219538	0.15575	0.431243	0.337271	0.540915	0.5191	0.53825	0.4673	-0.0590649	0.270849	0.154793	0.0897056	0.205348	-0.107939	-0.633779	-0.0927567	0.0874874	salmon|0.7179
NECAB1|NP_071746.1	M13	salmon	-0.0205685	0.0417941	0.112484	0.365251	0.13614	-0.435609	-0.455062	-0.243034	-0.120266	-0.10546	0.712738	-0.506317	0.215633	0.246104	-0.0326375	-0.0859739	-0.261771	0.102403	0.10682	-0.205754	-0.182978	0.114286	-0.00425005	0.0781887	0.292949	-0.581446	-0.335583	-0.173786	salmon|0.7127
DAG1|NP_004384.4	M13	salmon	0.192783	-0.0831294	-0.127567	0.272355	-0.0907633	-0.0979966	-0.191385	-0.403163	-0.200145	0.172181	0.705627	-0.362479	0.302548	0.416367	-0.00232874	0.406959	0.0933053	0.357518	0.300015	-0.167327	0.217979	0.378674	0.0684306	-0.118209	0.10925	-0.481511	-0.167519	0.0551186	salmon|0.7056
FARSB|NP_005678.3	M13	salmon	-0.264869	-0.0342967	-0.172538	0.0654531	-0.189199	-0.424822	-0.325506	-0.400761	-0.0105319	0.230577	0.701899	-0.210359	0.335099	0.45749	0.377027	0.0848355	0.179084	0.53659	0.584771	-0.0280521	0.141301	0.319661	0.290168	0.186144	0.209102	-0.698474	-0.0262857	0.0871258	salmon|0.7019
DNPEP|NP_036232.2	M13	salmon	0.440424	0.243206	-0.339637	0.303867	-0.197294	-0.204239	0.131315	-0.0834012	0.11271	0.273636	0.685285	-0.291808	0.468604	0.59181	0.250813	0.590463	0.299792	0.172298	0.0519793	0.109113	0.249518	0.316321	0.217072	-0.236805	0.00392984	-0.536648	-0.359549	-0.590146	salmon|0.6853
PPP2R2A|NP_001171062.1	M13	salmon	0.0182117	-0.0981015	0.300606	0.272403	-0.0341063	-0.417455	-0.392856	-0.279871	-0.443155	0.0140365	0.667118	-0.52575	0.023381	0.266776	-0.364701	0.0309705	-0.367505	0.0795775	0.262899	-0.0500885	-0.0180385	0.271929	-0.0325277	0.00366553	0.428487	-0.279613	-0.129805	-0.0777012	salmon|0.6671
HGS|NP_004703.1	M13	salmon	-0.127073	-0.0934881	0.343794	0.313187	0.0865245	-0.368543	-0.575807	-0.307455	-0.375341	-0.145989	0.661928	-0.508453	0.0463116	0.151772	-0.306598	-0.135953	-0.435102	0.117903	0.199277	-0.137707	-0.0861388	0.171835	-0.0565248	0.119824	0.41603	-0.442109	-0.156422	0.0137067	salmon|0.6619
DDB1|NP_001914.3	M13	salmon	-0.0748175	0.202191	-0.181556	0.284243	0.0927738	-0.151516	-0.241854	-0.257936	-0.00693268	-0.08069	0.656618	-0.234112	0.157383	0.124537	0.0692385	0.161493	-0.0194192	0.418066	0.228713	-0.274044	0.137649	0.162887	0.0876091	-0.145197	-0.206323	-0.696122	-0.169237	0.181538	salmon|0.6566
TBCB|NP_001272.2	M13	salmon	-0.123869	0.411344	0.235194	0.391987	0.142061	-0.419697	-0.256498	-0.0230253	0.0742983	0.23304	0.65412	-0.560573	0.250571	0.395848	0.174669	-0.0361661	-0.130346	-0.0970199	0.13056	-0.364175	-0.288391	-0.105504	-0.138814	0.064853	0.301043	-0.632414	-0.439757	-0.40791	salmon|0.6541
RAB2A|NP_002856.1	M13	salmon	-0.216233	-0.0426886	0.167258	0.279388	-0.0241653	-0.532992	-0.0708869	0.0403816	0.150958	0.412979	0.644024	-0.499291	0.0694173	0.431311	0.107073	0.110447	0.00573729	0.188433	0.437174	-0.282044	0.0188732	0.0296495	-0.0620391	0.438521	0.463607	-0.463735	0.00452777	-0.13674	salmon|0.644
ECH1|NP_001389.2	M13	salmon	0.534866	0.265614	-0.305373	0.460937	0.0719093	0.0681786	0.434237	0.0880044	0.490606	0.610748	0.636383	-0.371916	0.298876	0.585984	0.273006	0.645658	0.575421	0.0813911	0.116054	-0.176275	0.160733	0.0816929	-0.165469	-0.241892	-0.0016763	-0.381034	-0.328945	-0.343662	salmon|0.6364
LGALS3BP|NP_005558.1	M13	salmon	-0.0406834	-0.0690712	0.147678	0.469492	-0.0530505	-0.345447	0.20856	-0.136257	-0.109244	0.183688	0.63231	-0.658334	0.0046899	0.239618	-0.0124735	0.220171	-0.0790984	-0.107027	0.10348	0.156012	-0.0724189	0.160297	-0.0760832	-0.103506	0.149278	-0.201297	0.15519	-0.407159	salmon|0.6323
PSMA5|NP_002781.2	M13	salmon	0.165457	0.126308	-0.237237	0.342546	0.182208	0.228457	0.263489	0.135798	0.504139	0.549369	0.629656	-0.354019	0.0852869	0.393995	0.260893	0.536908	0.495361	0.216087	0.16818	-0.146095	0.10967	-0.0460566	-0.202245	-0.176835	-0.161987	-0.504698	-0.193948	-0.125767	salmon|0.6297
GARS|NP_002038.2	M13	salmon	-0.307037	-0.127413	0.32119	0.342601	-0.0646392	-0.482323	-0.275129	-0.397591	-0.390051	-0.0911666	0.624734	-0.532851	0.0111781	0.113776	-0.0859236	-0.0914987	-0.300268	0.057534	0.259412	0.0632203	-0.0523698	0.226522	0.0097269	0.0757904	0.32076	-0.35411	0.225114	0.0105527	salmon|0.6247
TOM1L2|NP_001076437.1	M13	salmon	0.187444	0.318663	0.051122	0.379726	-0.0265968	-0.588738	0.0122147	-0.0945753	-0.030715	0.162839	0.624624	-0.47824	0.235659	0.403572	0.141387	0.168071	-0.0177057	-0.138722	0.0577562	-0.147874	-0.12373	0.10184	0.00995286	-0.140126	0.218301	-0.419032	-0.24712	-0.409714	salmon|0.6246
NASP|NP_001182122.1	M13	salmon	0.344499	0.245431	0.0255391	0.382101	-0.107926	-0.351246	-0.343335	-0.546215	-0.338284	-0.0857115	0.621349	-0.318323	0.455044	0.415136	-0.0981746	0.0377303	-0.123834	0.101093	0.171798	0.0216846	0.104754	0.430141	0.117271	-0.279637	0.375604	-0.35242	-0.325691	-0.250066	salmon|0.6213
KIF21A|NP_001166936.1	M13	salmon	0.397	0.0692893	-0.156016	0.48344	-0.0321183	-0.179571	-0.024602	-0.256111	-0.175652	-0.0852628	0.619121	-0.492694	0.256707	0.295117	-0.0328833	0.37525	-0.0592436	-0.00853375	-0.179094	0.191844	0.0638058	0.345022	0.0957062	-0.579455	-0.0774144	-0.307078	-0.0935016	-0.556128	salmon|0.6191
EEF1G|NP_001395.1	M13	salmon	-0.00486187	0.0279524	0.276176	0.163626	0.177507	-0.141385	-0.475172	-0.0406806	0.00454464	0.320607	0.61803	-0.414579	0.0527268	0.377073	-0.160116	-0.0573146	-0.110352	0.121737	0.319056	-0.226915	-0.182002	-0.0139842	-0.176738	0.192541	0.46845	-0.450399	-0.453641	-0.0373144	salmon|0.618
PSME1|NP_006254.1	M13	salmon	0.403018	0.401047	-0.189847	0.556309	0.241242	0.0752123	-0.0257949	-0.26361	0.207307	0.119526	0.61275	-0.374813	0.399434	0.301037	0.253022	0.220391	0.245308	0.0135964	-0.0412877	-0.332822	-0.13777	0.0725786	-0.140176	-0.401855	-0.12499	-0.552707	-0.465623	-0.115176	salmon|0.6128
CSRP2|NP_001312.1	M13	salmon	-0.11429	0.174357	-0.0621179	0.183014	0.0924597	-0.447563	-0.249069	-0.0581848	0.168471	0.326786	0.610605	-0.370929	0.312391	0.479081	0.298178	0.130823	0.0917664	0.24239	0.360142	-0.62231	-0.0965576	-0.0141472	-0.0648554	0.245029	0.263096	-0.637848	-0.395232	-0.0178791	salmon|0.6106
MAP4|NP_002366.2	M13	salmon	0.148233	-0.187306	-0.135823	-0.0304913	-0.413845	-0.391155	-0.164517	-0.347381	-0.087424	0.474058	0.608603	-0.141743	0.452933	0.696251	0.22014	0.268657	0.29653	0.456533	0.631666	0.101081	0.259713	0.492075	0.340993	0.417992	0.547579	-0.400211	-0.154341	-0.0463802	salmon|0.6086
DAD1|NP_001335.1	M13	salmon	0.424009	0.362016	-0.446144	0.373414	0.0338517	0.221691	0.0470186	-0.237766	0.19591	0.156511	0.600513	-0.171241	0.555339	0.379596	0.361669	0.508805	0.404299	0.247957	0.0252919	-0.260863	0.130114	0.195586	0.0663649	-0.31208	-0.308937	-0.667816	-0.55793	-0.124312	salmon|0.6005
SERBP1|NP_056455.3	M13	salmon	0.429424	0.158089	-0.401605	0.20399	0.0614236	0.0928969	-0.293378	-0.344821	0.0955618	0.0420887	0.594907	-0.06341	0.386903	0.362482	0.134917	0.271886	0.277714	0.413896	0.143028	-0.0223517	0.179796	0.31716	0.158703	-0.397141	-0.105466	-0.562807	-0.413374	0.0240411	salmon|0.5949
RAB2A|NP_001229573.1	M13	salmon	-0.246796	-0.0381681	0.275308	0.345286	0.174539	-0.379142	-0.0223567	0.24753	0.338689	0.482639	0.580524	-0.562665	-0.103636	0.322028	0.019857	0.0239538	-0.0241169	0.0833363	0.366704	-0.393858	-0.124149	-0.185702	-0.260714	0.499744	0.443072	-0.402689	-0.0390669	-0.11591	salmon|0.5805
RAB6B|NP_057661.3	M13	salmon	-0.304426	-0.289332	-0.164208	-0.015858	-0.320378	-0.393895	-0.0152711	-0.269242	-0.278019	0.211098	0.573803	-0.389033	0.176991	0.401914	0.287509	0.426882	0.0856932	0.270175	0.304461	0.243503	0.137129	0.344798	0.241473	-0.0883097	0.0116405	-0.355572	0.21167	-0.279649	salmon|0.5738
ALDH1A1|NP_000680.2	M13	salmon	0.2623	0.106942	0.148737	0.547677	0.112018	-0.19582	-0.380532	-0.372224	-0.365166	-0.143313	0.571754	-0.633319	0.269625	0.248389	-0.163102	0.0838716	-0.341132	-0.0916128	-0.141063	-0.169594	-0.197249	0.272841	-0.0652971	-0.483263	0.125915	-0.309044	-0.183917	-0.392726	salmon|0.5718
RPS6|NP_001001.2	M13	salmon	0.228534	0.00925785	-0.281992	0.286646	0.0968108	0.00678658	0.162259	0.0451331	0.386542	0.499257	0.56755	-0.346491	0.23788	0.534426	0.214687	0.513729	0.415901	0.244369	0.225046	-0.24665	0.191676	0.0669702	-0.172549	-0.0944743	0.109729	-0.355281	-0.241324	-0.215984	salmon|0.5675
ACADSB|NP_001600.1	M13	salmon	-0.0955866	0.220536	-0.118625	0.126256	-0.0340488	0.0666546	-0.225872	-0.35859	-0.050653	0.180304	0.566875	-0.111843	0.208927	0.200605	0.233585	0.0829658	0.197044	0.341231	0.417838	-0.0375233	0.000768455	0.192239	0.126171	-0.141403	-0.157895	-0.603272	-0.225134	0.27942	salmon|0.5669
USP14|NP_005142.1	M13	salmon	-0.043994	-0.149534	0.221271	0.0681533	-0.271662	-0.545878	-0.503633	-0.483474	-0.635415	-0.106732	0.56484	-0.330523	0.20271	0.301667	-0.224654	-0.0559903	-0.358062	0.151706	0.33039	0.169844	0.0371378	0.447332	0.234255	0.0790537	0.486195	-0.264585	-0.0940273	-0.08678	salmon|0.5648
PPP2R1A|NP_055040.2	M13	salmon	0.142413	0.0515396	0.275815	0.491405	0.250395	0.076421	-0.318312	-0.210701	-0.165516	-0.0930831	0.564113	-0.407903	-0.107544	0.0201166	-0.506495	-0.041001	-0.275592	0.0946841	0.136097	-0.0788793	0.0852695	0.117898	-0.265445	-0.201186	0.223889	-0.234468	-0.129365	0.126533	salmon|0.5641
ATP6V1B2|NP_001684.2	M13	salmon	0.125949	0.198431	0.00553225	0.144363	0.0256127	-0.0328604	-0.176125	-0.0448333	0.140184	0.307243	0.554382	-0.23645	0.182587	0.317341	0.163005	0.0994221	0.13676	0.163848	0.178927	-0.0394646	-0.18317	0.0713144	0.109875	0.0905211	0.0215463	-0.585259	-0.371807	-0.103548	salmon|0.5544
RAB6A|NP_942599.1	M13	salmon	-0.286056	-0.316821	-0.210642	-0.0312789	-0.356674	-0.355626	0.0545939	-0.271075	-0.256442	0.233088	0.549314	-0.357213	0.185646	0.403553	0.326344	0.477013	0.147304	0.284719	0.301273	0.296404	0.173838	0.366558	0.270308	-0.095396	-0.0308475	-0.332127	0.258314	-0.282602	salmon|0.5493
OLA1|NP_037473.3	M13	salmon	-0.370136	-0.169916	-0.141335	-0.115284	-0.192784	-0.513988	-0.369434	-0.231797	0.00873386	0.145462	0.547074	-0.137311	0.268576	0.334583	0.402646	-0.0211723	0.0705571	0.502106	0.478535	-0.0927003	-0.025709	0.208069	0.374493	0.515503	0.182296	-0.690504	-0.0569152	0.115233	salmon|0.5471
MON2|NP_055841.2	M13	salmon	-0.0235535	-0.270481	-0.161716	0.258665	-0.0444931	-0.125956	0.106857	-0.258755	-0.0622805	0.110988	0.5342	-0.355741	0.0202294	0.172568	0.0478603	0.29649	0.130668	0.242328	0.251325	0.109428	0.148095	0.267748	0.00420246	-0.142217	-0.0275846	-0.196947	0.210025	0.0625018	salmon|0.5342
ACTR1A|NP_005727.1	M13	salmon	0.498642	0.27685	-0.133415	0.288687	0.188171	0.291316	0.1924	0.0968851	0.368876	0.576102	0.525647	-0.230923	-0.00538195	0.358564	-0.051452	0.343095	0.391093	0.110733	0.224451	-0.0666763	-0.010912	0.0312657	-0.188595	-0.342652	-0.0827457	-0.252112	-0.393173	-0.0302264	salmon|0.5256
POLR2C|NP_116558.1	M13	salmon	0.252485	0.611466	-0.358701	0.100961	0.104776	-0.0469827	-0.0937955	-0.109813	0.330606	0.355335	0.484394	-0.048327	0.505297	0.491697	0.521688	0.266528	0.433522	0.207612	0.162601	-0.497058	-0.0928482	-0.0107395	0.0447329	-0.222809	-0.1729	-0.723901	-0.708076	-0.0434583	salmon|0.4844
A2M|NP_000005.2	M13	salmon	0.222684	0.422364	-0.253938	-0.0362352	0.00187026	-0.0657501	-0.128571	-0.166798	0.0376044	0.366735	0.414925	0.00170977	0.314067	0.47528	0.162046	0.278202	0.306954	0.238336	0.382149	-0.338454	0.113032	0.114842	-0.0333766	-0.313653	0.0251235	-0.367254	-0.582237	0.101103	salmon|0.4149
SYP|NP_003170.1	M20	royalblue	0.321946	0.109166	-0.74785	-0.433454	-0.539071	0.120344	0.491076	-0.1144	0.276271	0.468647	-0.0815884	0.625561	0.511433	0.512928	0.634311	0.638894	0.930241	0.442406	0.377108	0.28833	0.667234	0.349616	0.429952	-0.0186701	-0.141505	-0.0524127	-0.081628	0.0549449	royalblue|0.9302
PPM1L|NP_640338.2	M20	royalblue	0.402323	0.108457	-0.789349	-0.300812	-0.572615	0.0991557	0.485892	-0.220977	0.180004	0.48068	0.0382259	0.45744	0.623834	0.616536	0.669401	0.770635	0.906468	0.429541	0.327411	0.271802	0.652365	0.463176	0.453498	-0.219072	-0.191724	-0.0997462	-0.0624943	-0.121938	royalblue|0.9065
REEP5|NP_005660.4	M20	royalblue	0.479622	0.114983	-0.703131	-0.125393	-0.432813	0.107363	0.494496	-0.101676	0.326507	0.593592	0.329292	0.286721	0.524396	0.66069	0.510424	0.801334	0.906354	0.46106	0.421357	0.204586	0.645691	0.393125	0.306081	-0.0580195	-0.0686868	-0.255499	-0.236338	-0.072445	royalblue|0.9064
DNAJB2|NP_006727.2	M20	royalblue	0.391675	0.0905197	-0.794385	-0.345242	-0.48472	0.165696	0.482069	-0.108062	0.258561	0.410743	-0.014989	0.560054	0.439023	0.478539	0.522738	0.734521	0.875903	0.507496	0.31963	0.277964	0.738433	0.400061	0.418226	-0.215371	-0.267559	-0.0668426	0.00433517	0.0444457	royalblue|0.8759
HBZ|NP_005323.1	M20	royalblue	0.153696	0.0235522	-0.666973	-0.0854841	-0.260942	0.169784	0.372851	-0.0865226	0.422439	0.587278	0.469262	0.117731	0.402886	0.537509	0.667081	0.723772	0.868494	0.535636	0.413664	0.0990464	0.4112	0.24838	0.258783	-0.0211553	-0.289229	-0.528918	-0.139238	0.0528627	royalblue|0.8685
SFXN3|NP_112233.2	M20	royalblue	0.278272	-0.0337637	-0.556045	-0.191958	-0.342694	0.158485	0.221475	-0.141148	0.360231	0.718536	0.451502	0.204668	0.393964	0.674196	0.489815	0.616684	0.858484	0.608879	0.596558	0.23949	0.484267	0.364619	0.304906	0.066033	0.0202944	-0.40324	-0.169747	0.0835459	royalblue|0.8585
NDUFAB1|NP_004994.1	M20	royalblue	0.450488	0.0467339	-0.641923	-0.131841	-0.27711	0.306438	0.487126	0.0364517	0.470329	0.68472	0.172067	0.277743	0.303007	0.559732	0.364432	0.691127	0.845314	0.496428	0.405336	0.148857	0.561139	0.296789	0.199376	-0.141546	-0.143242	-0.0877529	-0.0838942	-0.0276639	royalblue|0.8453
CHMP6|NP_078867.2	M20	royalblue	0.268784	-0.0871447	-0.717615	-0.150619	-0.213564	0.267871	0.449784	0.0499192	0.468606	0.426533	0.198365	0.225944	0.350234	0.393792	0.608816	0.705859	0.827241	0.394529	0.137039	0.163238	0.385371	0.167956	0.238715	-0.0426845	-0.355259	-0.296812	-0.112766	-0.0532389	royalblue|0.8272
NCAM2|NP_004531.2	M20	royalblue	-0.14831	-0.133546	-0.641305	-0.339325	-0.305444	0.0668041	0.318185	0.0508223	0.49055	0.542549	0.258455	0.320884	0.235415	0.40225	0.66065	0.517926	0.808032	0.657689	0.546476	0.165377	0.457608	0.160179	0.336026	0.302256	-0.215668	-0.428129	0.0405941	0.209463	royalblue|0.808
SRSF3|NP_003008.1	M20	royalblue	0.22317	0.0725144	-0.530194	-0.202011	-0.130769	0.311818	0.21757	-0.0238708	0.536568	0.562694	0.187532	0.346564	0.270987	0.381201	0.514135	0.329411	0.805657	0.491549	0.433338	0.0925272	0.251118	0.129456	0.216905	0.10142	-0.164196	-0.329948	-0.206532	0.265713	royalblue|0.8057
ATP6AP1|NP_001174.2	M20	royalblue	0.12884	0.165322	-0.578297	-0.467857	-0.213816	0.234125	0.378233	0.162038	0.553263	0.410964	-0.296483	0.665488	0.239665	0.218401	0.622149	0.264706	0.80387	0.316567	0.230202	0.0712314	0.298245	-0.0279961	0.263215	0.151753	-0.251942	-0.0609299	-0.107923	0.229755	royalblue|0.8039
ENDOD1|NP_055851.1	M20	royalblue	0.381401	-0.151767	-0.71681	-0.449512	-0.769964	-0.112838	0.20552	-0.438346	-0.0901988	0.493192	0.174266	0.437493	0.719639	0.780806	0.571372	0.685517	0.794232	0.598667	0.563956	0.423373	0.68165	0.715795	0.647913	0.0298411	0.14035	-0.118555	-0.0728276	-0.0727808	royalblue|0.7942
SHISA4|NP_937792.2	M20	royalblue	0.223509	0.168245	-0.602094	-0.361127	-0.497565	-0.0527278	0.487274	-0.1688	0.127455	0.435771	-0.01666	0.473406	0.41047	0.453752	0.580436	0.570877	0.792937	0.312624	0.389244	0.18982	0.527788	0.314576	0.34855	-0.114787	-0.144369	-0.0362028	-0.00997135	0.114329	royalblue|0.7929
EMC3|NP_060917.1	M20	royalblue	0.185559	0.0917584	-0.50487	-0.189737	-0.311816	0.0344779	0.37018	0.051994	0.442429	0.608515	0.23177	0.277193	0.357699	0.506078	0.560206	0.549164	0.78641	0.445708	0.450674	0.005148	0.40933	0.166137	0.26147	0.256286	-0.0600257	-0.350397	-0.139394	0.0931544	royalblue|0.7864
SEPHS1|NP_001182533.1	M20	royalblue	0.140877	-0.267901	-0.593523	-0.356654	-0.681214	-0.0750348	0.441139	-0.311707	0.0145365	0.40397	0.0662386	0.438012	0.464801	0.502635	0.49733	0.617921	0.771923	0.532296	0.566425	0.391071	0.760148	0.537857	0.463494	0.258476	0.115053	0.0131164	0.223507	0.172581	royalblue|0.7719
GPX4|NP_002076.2	M20	royalblue	0.0770909	0.0570628	-0.615338	-0.371244	-0.262422	0.355243	0.502303	0.0409045	0.368682	0.20832	-0.341482	0.576717	0.280179	0.0819447	0.669222	0.40568	0.757798	0.19402	0.0102011	0.199025	0.316431	0.0248348	0.258232	-0.0409892	-0.466948	0.00775708	0.05266	0.126013	royalblue|0.7578
RAB18|NP_067075.1	M20	royalblue	0.153544	-0.102216	-0.641973	-0.120637	-0.435522	0.121764	0.362856	-0.132816	0.260857	0.407365	0.403899	0.17301	0.399842	0.444925	0.623016	0.71211	0.757092	0.527036	0.302645	0.400327	0.482232	0.381996	0.474026	0.0303501	-0.321233	-0.487846	0.0552563	-0.0718223	royalblue|0.7571
MAPRE2|NP_055083.1	M20	royalblue	0.276212	0.21	-0.599268	-0.0500374	-0.10423	0.207317	0.377183	0.194211	0.612018	0.532275	0.31024	0.241239	0.241597	0.425385	0.404377	0.621759	0.747757	0.519265	0.330048	-0.0838622	0.503503	0.0839543	0.140707	0.0237441	-0.252501	-0.428659	-0.220677	0.0657411	royalblue|0.7478
RPS3A|NP_000997.1	M20	royalblue	0.375017	-0.00544641	-0.442364	-0.0823375	0.0301315	0.533041	0.386674	0.18442	0.628773	0.590779	0.0522333	0.287814	0.0308027	0.280887	0.184215	0.419349	0.744399	0.38627	0.298448	0.0535166	0.368704	0.0268121	-0.0501218	-0.0372561	-0.142237	-0.0162128	-0.096186	0.229675	royalblue|0.7444
NDUFA3|NP_004533.1	M20	royalblue	0.208483	-0.036998	-0.543982	-0.00256161	-0.374358	0.1125	0.277773	-0.287573	0.196834	0.589278	0.409466	0.0492146	0.512139	0.668863	0.499259	0.686324	0.740673	0.539781	0.513715	0.10683	0.561468	0.442818	0.230522	-0.0981009	0.0173638	-0.300424	0.00160676	-0.0508326	royalblue|0.7407
DNAJC9|NP_056005.1	M20	royalblue	0.174177	-0.0871717	-0.45786	-0.200467	-0.524018	-0.0979588	0.641413	-0.111283	0.150933	0.471363	0.0453995	0.295744	0.295967	0.426687	0.447467	0.585382	0.735779	0.265303	0.416747	0.314895	0.596684	0.332522	0.263433	0.137111	0.0643693	0.0961461	0.22635	0.0445211	royalblue|0.7358
L2HGDH|NP_079160.1	M20	royalblue	0.35008	0.392935	-0.549194	-0.162088	-0.24745	0.0378928	0.273321	-0.135027	0.269436	0.516419	0.205186	0.342617	0.439259	0.570435	0.401512	0.497233	0.733299	0.375001	0.481457	-0.0686924	0.50296	0.234642	0.129982	-0.236686	-0.00816894	-0.191987	-0.361808	0.100805	royalblue|0.7333
FAM213A|NP_001230708.1	M20	royalblue	0.284381	-0.0330945	-0.564489	-0.292965	-0.43683	0.0663046	0.483939	-0.184071	0.0593277	0.253617	-0.00357224	0.3817	0.304039	0.318755	0.466704	0.565094	0.711644	0.184482	0.151015	0.501264	0.467693	0.326357	0.323691	-0.253324	-0.200092	0.0576441	0.0839399	-0.0215226	royalblue|0.7116
COX7A2|NP_001856.2	M20	royalblue	0.1391	-0.17889	-0.708893	-0.337846	-0.407013	0.123735	0.280047	-0.0698082	0.253038	0.22729	0.111724	0.43048	0.405314	0.313413	0.561098	0.54459	0.699102	0.520514	0.267583	0.290491	0.494956	0.30162	0.457949	0.224464	-0.242079	-0.286268	-0.0882716	0.102086	royalblue|0.6991
DCAKD|NP_079095.3	M20	royalblue	0.408607	0.106412	-0.543898	-0.293635	-0.249747	0.33567	0.0491684	-0.250605	0.237472	0.195352	0.00876136	0.607068	0.35561	0.2736	0.323427	0.273953	0.683849	0.483378	0.280815	0.310654	0.490202	0.308348	0.357983	-0.112494	-0.129523	-0.184871	-0.176824	0.316603	royalblue|0.6838
OCIAD1|NP_001161726.1	M20	royalblue	0.10776	-0.434635	-0.567308	-0.291905	-0.61278	-0.138946	0.278856	-0.174795	0.108735	0.558452	0.33055	0.146505	0.361673	0.673832	0.417975	0.673828	0.661048	0.638037	0.562995	0.54256	0.665215	0.572234	0.499739	0.175804	0.167697	-0.133489	0.263556	-0.198019	royalblue|0.661
STK32C|NP_775846.2	M20	royalblue	0.0659735	-0.0527765	-0.536947	-0.400332	-0.383267	-0.069328	0.207832	-0.169401	0.189881	0.465065	0.0865896	0.349037	0.355953	0.472609	0.533725	0.399613	0.65993	0.450597	0.471822	0.175688	0.340956	0.267548	0.358721	0.0407401	-0.0507661	-0.14816	-0.04348	0.0623343	royalblue|0.6599
RAB21|NP_055814.1	M20	royalblue	-0.0378309	-0.0231748	-0.559465	-0.42065	-0.255431	0.0584899	0.141135	0.084916	0.434841	0.363595	0.0551407	0.37693	0.310839	0.313224	0.725919	0.299993	0.659013	0.399666	0.206086	0.203309	0.121648	0.0616838	0.430827	0.24042	-0.270871	-0.418073	-0.141625	-0.0077813	royalblue|0.659
SURF1|NP_003163.1	M20	royalblue	0.0311964	0.000431328	-0.649199	-0.148118	-0.224874	0.359025	0.226368	-0.0835239	0.329819	0.191103	0.178372	0.306181	0.300652	0.183006	0.594445	0.541641	0.654559	0.535999	0.133064	0.225827	0.405568	0.211313	0.381737	-0.115945	-0.573581	-0.485373	0.065238	0.103549	royalblue|0.6546
APOA1|NP_000030.1	M20	royalblue	0.276855	-0.253008	-0.386866	-0.0537358	-0.368421	0.181331	0.383841	-0.0498259	0.196372	0.576617	0.392207	-0.018699	0.182871	0.477457	0.298714	0.664685	0.620977	0.377608	0.30594	0.477741	0.377702	0.376544	0.30048	-0.0040878	-0.0944748	-0.202662	0.13861	-0.16574	royalblue|0.621
ACTR1B|NP_005726.1	M20	royalblue	0.491655	0.353861	-0.424798	0.180995	0.0324207	0.168382	0.431775	0.286877	0.594028	0.350153	0.130663	0.0635823	0.342675	0.354358	0.45638	0.502404	0.612651	-0.0395718	-0.172168	-0.11805	0.166843	-0.094377	-0.0326739	-0.142078	-0.173311	-0.254203	-0.356571	-0.349189	royalblue|0.6127
INA|NP_116116.1	M20	royalblue	0.488959	-0.0970215	-0.296447	-0.22049	-0.2029	0.516298	0.254367	-0.0549347	0.187105	0.49095	-0.202477	0.375011	0.231193	0.360109	0.0705206	0.409621	0.605749	0.227134	0.240941	0.103238	0.430378	0.213352	0.00852204	-0.0544506	0.125672	0.290955	-0.0995812	0.155939	royalblue|0.6057
SCAMP1|NP_004857.4	M20	royalblue	0.27155	0.00889568	-0.434866	-0.330122	-0.160537	0.169993	0.332207	0.24612	0.475092	0.290661	-0.346528	0.575398	0.176113	0.179174	0.261183	0.213654	0.572415	0.256589	0.186448	-0.0523636	0.405486	-0.0063817	0.117311	0.334638	0.0519115	0.173576	-0.114995	0.202945	royalblue|0.5724
SNRPB|NP_937859.1	M20	royalblue	0.312602	0.618199	-0.354332	0.138253	-0.0701983	0.0298107	0.417864	0.111764	0.471633	0.344405	0.0834279	0.128548	0.40219	0.367838	0.535203	0.346117	0.557166	-0.0392031	-0.0395653	-0.09472	0.163801	-0.0511814	0.0495284	-0.262523	-0.178879	-0.269232	-0.28356	-0.361383	royalblue|0.5572
SYNCRIP|NP_001153145.1	M20	royalblue	0.0586726	0.398799	-0.480985	-0.448483	-0.268606	-0.0974067	0.33924	0.118864	0.195042	0.111509	-0.372001	0.546628	0.235566	0.142346	0.545311	0.218955	0.463591	0.00501144	-0.0455096	0.135847	0.187976	-0.0240635	0.294618	-0.279951	-0.350465	0.0533263	-0.0855836	-0.154598	royalblue|0.4636
PSMA3|NP_002779.1	M6	red	0.182514	0.534165	0.404031	0.923068	0.675113	0.100466	0.0677205	0.259642	0.310412	0.00157332	0.519913	-0.796427	-0.136692	-0.0910732	-0.222068	-0.0105513	-0.287073	-0.484987	-0.431075	-0.647537	-0.462422	-0.451114	-0.662188	-0.314677	-0.0987155	-0.397708	-0.365671	-0.318743	red|0.9231
JAM3|NP_001192258.1	M6	red	0.417681	0.531439	0.367346	0.906821	0.652685	0.328774	0.326219	0.455204	0.519874	0.234931	0.456655	-0.673874	-0.264925	-0.0496794	-0.350572	0.116929	-0.0800757	-0.477305	-0.370959	-0.449229	-0.297628	-0.459375	-0.713849	-0.302209	-0.0699091	-0.209365	-0.355652	-0.3266	red|0.9068
IPO7|NP_006382.1	M6	red	0.373948	0.575704	0.395287	0.90427	0.603788	0.076277	0.0631265	0.253367	0.284096	0.0173569	0.493513	-0.751435	-0.0430886	-0.0286653	-0.250201	-0.0405572	-0.293553	-0.541132	-0.462429	-0.582928	-0.512304	-0.387439	-0.570525	-0.269114	-0.0241591	-0.352773	-0.512858	-0.430755	red|0.9043
VCAN|NP_001157570.1	M6	red	0.363364	0.44663	0.42136	0.893994	0.556542	0.12718	0.437317	0.419232	0.36582	0.217726	0.352546	-0.746536	-0.245934	-0.0153471	-0.360524	0.14417	-0.155324	-0.611748	-0.384824	-0.479988	-0.284671	-0.423511	-0.754285	-0.294651	0.0661784	0.0141638	-0.219671	-0.432546	red|0.894
PLP1|NP_001122306.1	M6	red	0.223121	0.366643	0.510201	0.890161	0.733432	0.343461	0.0598095	0.295702	0.33487	-0.0104359	0.425457	-0.734738	-0.27621	-0.253715	-0.349237	-0.136995	-0.292953	-0.535211	-0.460237	-0.51162	-0.562832	-0.506061	-0.706002	-0.151467	-0.086219	-0.283775	-0.361398	-0.145396	red|0.8902
PSMB7|NP_002790.1	M6	red	0.254975	0.538713	0.403499	0.88322	0.601322	0.0734473	0.0147831	0.186895	0.185162	-0.168076	0.405542	-0.695211	-0.0414859	-0.153471	-0.221756	-0.0664311	-0.348855	-0.553028	-0.537952	-0.609145	-0.46461	-0.402032	-0.570996	-0.277548	-0.0859949	-0.35011	-0.405127	-0.322324	red|0.8832
AQP1|NP_932766.1	M6	red	0.232397	0.243556	0.297353	0.882891	0.591678	0.245273	0.11562	0.199188	0.26226	-0.0827823	0.417141	-0.716252	-0.189351	-0.153305	-0.29886	0.0526615	-0.243796	-0.395273	-0.452858	-0.349109	-0.285432	-0.303408	-0.590031	-0.390822	-0.118862	-0.187009	-0.116455	-0.316978	red|0.8829
CNP|NP_149124.3	M6	red	0.277667	0.450269	0.446179	0.881313	0.784662	0.298465	0.185062	0.504768	0.558953	0.158092	0.411285	-0.692686	-0.37535	-0.175029	-0.411538	-0.0845819	-0.213923	-0.46147	-0.360463	-0.591976	-0.444928	-0.572742	-0.77534	-0.149198	-0.0406764	-0.216385	-0.363439	-0.184134	red|0.8813
AK1|NP_000467.1	M6	red	0.189465	0.220385	0.660422	0.874243	0.71222	0.200206	0.224155	0.480763	0.312662	0.140082	0.296878	-0.852538	-0.456844	-0.182461	-0.568576	-0.0867195	-0.395562	-0.663847	-0.424732	-0.520312	-0.477453	-0.553187	-0.882006	-0.112396	0.179589	0.0854957	-0.170568	-0.32888	red|0.8742
CD44|NP_001189484.1	M6	red	0.124902	0.140868	0.287576	0.857717	0.50606	0.232509	0.314336	0.2484	0.307109	0.00469357	0.430334	-0.698978	-0.256446	-0.182495	-0.259556	0.172684	-0.155022	-0.315721	-0.350044	-0.363054	-0.164892	-0.305407	-0.572777	-0.166901	-0.152641	-0.19701	0.0476894	-0.179056	red|0.8577
GSN|NP_001121139.1	M6	red	0.257344	0.501542	0.372679	0.857339	0.589084	0.106935	0.235681	0.487266	0.496715	0.214811	0.409761	-0.710357	-0.151284	0.0110607	-0.254374	0.023855	-0.196334	-0.451819	-0.319328	-0.607812	-0.367392	-0.467307	-0.644654	-0.0692077	0.0529088	-0.238901	-0.38742	-0.44574	red|0.8573
SYNGR2|NP_004701.1	M6	red	0.473896	0.251451	0.244413	0.851605	0.512067	0.273893	0.212421	0.237249	0.316287	-0.00773061	0.332493	-0.621652	-0.154701	-0.110048	-0.342587	0.0720893	-0.190619	-0.380636	-0.469678	-0.299104	-0.277853	-0.221111	-0.473912	-0.333151	-0.112363	-0.0887217	-0.141286	-0.362375	red|0.8516
PSMB3|NP_002786.2	M6	red	0.40835	0.370404	0.273652	0.841227	0.35268	-0.0983738	-0.152099	-0.163573	-0.107255	-0.127855	0.625569	-0.764344	0.211687	0.16833	-0.239017	0.0846425	-0.325961	-0.353768	-0.343999	-0.374264	-0.277566	0.00473742	-0.359745	-0.448597	0.133993	-0.346504	-0.395285	-0.483458	red|0.8412
AHSA1|NP_036243.1	M6	red	0.504836	0.274477	0.602634	0.837042	0.545389	0.124512	0.0469031	0.252835	0.120703	0.0344655	0.300994	-0.709175	-0.219628	-0.040645	-0.653649	-0.136207	-0.415173	-0.61852	-0.397111	-0.354725	-0.363336	-0.292731	-0.682827	-0.184095	0.378569	0.13341	-0.334724	-0.401331	red|0.837
CD9|NP_001760.1	M6	red	0.130212	0.394283	0.619488	0.834877	0.796007	0.358691	0.235158	0.503439	0.406435	0.0287245	0.250848	-0.684225	-0.552504	-0.402057	-0.489587	-0.198619	-0.336323	-0.655848	-0.481019	-0.463374	-0.557521	-0.662506	-0.836398	-0.180169	-0.117692	-0.0534154	-0.20189	-0.107917	red|0.8349
TKT|NP_001128527.1	M6	red	0.483706	0.573182	0.424353	0.832133	0.719747	0.26585	0.0684262	0.303978	0.288373	-0.109531	0.180883	-0.59718	-0.174439	-0.202649	-0.352046	-0.157562	-0.305947	-0.719102	-0.674617	-0.497263	-0.564964	-0.484361	-0.682041	-0.515866	-0.0881878	-0.0511464	-0.440543	-0.378237	red|0.8321
PSMB4|NP_002787.2	M6	red	0.430517	0.491206	0.141328	0.824978	0.426248	0.0722976	0.0612721	0.0544286	0.106211	-0.0463937	0.572452	-0.691045	0.0647207	0.0927687	-0.176179	0.229297	-0.175651	-0.365061	-0.436599	-0.306029	-0.236453	-0.115953	-0.396098	-0.667243	-0.174524	-0.349662	-0.345469	-0.522435	red|0.825
MOG|NP_996532.2	M6	red	0.18902	0.311646	0.573611	0.811605	0.812323	0.315175	0.18788	0.560197	0.404588	-0.0615891	0.165274	-0.733815	-0.480967	-0.405663	-0.424129	-0.202203	-0.415695	-0.747869	-0.700334	-0.491695	-0.709683	-0.686312	-0.776123	-0.177941	-0.165593	-0.0360329	-0.252733	-0.322573	red|0.8116
PSMA1|NP_683877.1	M6	red	0.277139	0.544495	0.455446	0.810725	0.61058	-0.0715591	-0.11995	0.198276	0.156401	0.0145391	0.578048	-0.787142	-0.103506	0.0401472	-0.378734	-0.0859426	-0.410615	-0.462475	-0.340612	-0.589777	-0.47415	-0.353028	-0.587462	-0.329371	0.107826	-0.359439	-0.533003	-0.409998	red|0.8107
CLIP2|NP_003379.3	M6	red	0.0582138	0.248545	0.329769	0.808976	0.630997	0.151651	0.00710502	0.220358	0.16408	-0.373107	0.287532	-0.648675	-0.285755	-0.405146	-0.316711	-0.113027	-0.460325	-0.425111	-0.609254	-0.401021	-0.398294	-0.382568	-0.503198	-0.356153	-0.306049	-0.230072	-0.0371462	-0.234023	red|0.809
ALDH1B1|NP_000683.3	M6	red	0.589701	0.383339	0.257864	0.805076	0.401695	0.0846934	-0.125664	-0.109356	-0.0384046	-0.0211115	0.483168	-0.692268	0.229514	0.213709	-0.28328	0.10962	-0.242027	-0.412999	-0.387471	-0.437242	-0.293001	-0.0300033	-0.446209	-0.520496	0.170302	-0.189203	-0.497527	-0.481708	red|0.8051
SEPT3|NP_061979.3	M6	red	0.544711	0.405687	0.374722	0.791911	0.69957	0.451165	0.0044142	0.292148	0.331211	0.0946948	0.320762	-0.609519	-0.149555	-0.0863229	-0.44687	-0.0561436	-0.228698	-0.474567	-0.439753	-0.569225	-0.494543	-0.393884	-0.671974	-0.303793	-0.022405	-0.124488	-0.576859	-0.221811	red|0.7919
ALDH9A1|NP_000687.3	M6	red	0.476921	0.35457	0.478427	0.785978	0.736803	0.33943	-0.147931	0.184015	0.243715	0.0543904	0.316786	-0.652482	-0.146804	-0.0643721	-0.480801	-0.182298	-0.307756	-0.493505	-0.395722	-0.644136	-0.535368	-0.390076	-0.729903	-0.285971	0.156499	-0.0906251	-0.536182	-0.143506	red|0.786
CD38|NP_001766.2	M6	red	0.0399206	0.25971	0.544784	0.777012	0.69505	0.0507885	0.0883325	0.466971	0.369907	0.226501	0.41993	-0.895583	-0.327566	-0.0316005	-0.321206	-0.0633245	-0.345521	-0.540287	-0.346698	-0.634137	-0.575596	-0.560718	-0.773972	-0.0855778	0.127466	-0.170351	-0.278205	-0.411405	red|0.777
BCAN|NP_068767.3	M6	red	0.258456	0.364139	0.402107	0.770521	0.610704	0.248945	0.488856	0.562462	0.51912	0.116368	0.0940043	-0.516118	-0.441468	-0.254466	-0.393275	0.0210568	-0.14214	-0.538846	-0.433248	-0.44953	-0.218035	-0.538169	-0.731897	-0.159493	-0.0604912	0.12093	-0.00338097	-0.208237	red|0.7705
MYO1D|NP_056009.1	M6	red	0.0808923	-0.0707823	0.510602	0.769374	0.638344	0.296427	0.116549	0.354209	0.237369	-0.0304259	0.287973	-0.773739	-0.506402	-0.327272	-0.526775	-0.111646	-0.419033	-0.438466	-0.426905	-0.265366	-0.456903	-0.397384	-0.646843	-0.120695	-0.0470609	0.0342748	0.0689092	-0.21266	red|0.7694
ST13|NP_003923.2	M6	red	0.351817	0.379729	0.475788	0.76372	0.75704	0.44715	-0.207122	0.220214	0.204894	-0.0840223	0.267956	-0.631555	-0.134258	-0.181961	-0.448107	-0.18889	-0.391343	-0.508021	-0.519123	-0.641781	-0.572314	-0.454997	-0.706801	-0.283085	-0.00628585	-0.180083	-0.580646	-0.192014	red|0.7637
CRYAB|NP_001876.1	M6	red	0.408508	0.296107	0.084063	0.761918	0.408406	0.138724	0.231406	0.163683	0.379822	0.34612	0.588635	-0.621156	0.00887737	0.280101	-0.209621	0.343206	0.0899143	-0.102755	-0.0308825	-0.476692	0.0296731	-0.121578	-0.534479	-0.292305	0.111349	-0.232693	-0.275784	-0.253794	red|0.7619
PSMB1|NP_002784.1	M6	red	0.165768	0.67152	0.340846	0.761714	0.702228	0.225072	-0.146075	0.154448	0.304447	-0.105511	0.423865	-0.56255	-0.0215239	-0.1584	-0.0853705	-0.167018	-0.230161	-0.426925	-0.439789	-0.684995	-0.554851	-0.486414	-0.565154	-0.313003	-0.207482	-0.544437	-0.572227	-0.11567	red|0.7617
ACAA2|NP_006102.2	M6	red	0.186607	0.661171	0.420251	0.747816	0.729149	0.126127	-0.0712623	0.371656	0.397724	-0.13	0.224233	-0.541336	-0.105984	-0.224806	-0.169086	-0.273444	-0.348183	-0.563365	-0.560484	-0.755774	-0.615552	-0.607645	-0.5985	-0.148693	-0.110625	-0.367343	-0.54315	-0.259262	red|0.7478
GNG12|NP_061329.3	M6	red	0.635579	0.223505	0.127068	0.744097	0.336797	0.318182	0.347989	0.15991	0.369584	0.213332	0.351666	-0.467176	0.00267271	0.111085	-0.222799	0.251936	0.120549	-0.277138	-0.285785	-0.165687	-0.0637157	-0.0842059	-0.406818	-0.240263	0.0427674	-0.0476457	-0.175107	-0.300157	red|0.7441
GLIPR2|NP_071738.1	M6	red	0.0155778	0.0712538	0.411202	0.738649	0.628515	0.16722	0.109763	0.427143	0.507552	0.217816	0.426747	-0.718173	-0.388692	-0.08665	-0.337425	-0.0811868	-0.207774	-0.243325	-0.164794	-0.406616	-0.326749	-0.43428	-0.640834	0.0631134	0.120329	-0.175331	-0.0493715	-0.199722	red|0.7386
UGP2|NP_006750.3	M6	red	0.272649	0.485798	0.210017	0.725011	0.293849	-0.139145	-0.103553	-0.168015	-0.0477785	0.0118116	0.637237	-0.728923	0.267487	0.22879	0.055104	0.112158	-0.178462	-0.355815	-0.29722	-0.375538	-0.406419	-0.0459802	-0.26286	-0.476029	-0.0252489	-0.505648	-0.404029	-0.489181	red|0.725
TOMM40L|NP_115550.2	M6	red	0.170828	0.128687	0.411192	0.724455	0.697568	0.38075	0.184295	0.430303	0.307959	-0.0547321	0.177126	-0.683097	-0.432864	-0.369328	-0.413282	-0.0895403	-0.361393	-0.549202	-0.574083	-0.402011	-0.57948	-0.50964	-0.661313	-0.228773	-0.246201	0.0106845	-0.154275	-0.248343	red|0.7245
HSPA6|NP_002146.2	M6	red	0.341143	0.257952	0.470631	0.715839	0.53091	0.203805	-0.466554	-0.181102	-0.11891	-0.247144	0.351045	-0.571677	0.0616537	-0.0678636	-0.465796	-0.29484	-0.472932	-0.337095	-0.325922	-0.457871	-0.400569	-0.125558	-0.479392	-0.280146	0.252036	-0.186496	-0.446884	-0.11717	red|0.7158
ALDH1L2|NP_001029345.2	M6	red	0.407574	0.350072	0.352722	0.712657	0.641599	0.394962	0.166021	0.251642	0.205908	-0.24884	-0.00536935	-0.491039	-0.249427	-0.401283	-0.333541	-0.175601	-0.32253	-0.701289	-0.76994	-0.301457	-0.591848	-0.434727	-0.559668	-0.489145	-0.296429	0.0989525	-0.22846	-0.302446	red|0.7127
ALDH6A1|NP_005580.1	M6	red	0.305388	0.472646	0.36475	0.712545	0.454828	-0.0861001	0.0949094	0.0940303	0.219291	0.0224724	0.208721	-0.51325	-0.0527009	0.0133137	-0.255472	-0.178323	-0.230371	-0.434638	-0.269209	-0.492777	-0.284414	-0.249335	-0.508088	-0.27227	0.215015	-0.00418605	-0.167585	-0.267877	red|0.7125
ALDH2|NP_000681.2	M6	red	0.597269	0.540655	0.448303	0.710819	0.62157	0.250259	-0.0162075	0.21593	0.123341	-0.054979	0.0764808	-0.533787	-0.0533748	-0.0841788	-0.441893	-0.154918	-0.350747	-0.718868	-0.602806	-0.595032	-0.544137	-0.390071	-0.661248	-0.461289	0.0884479	0.0999342	-0.5802	-0.375984	red|0.7108
RAP1B|NP_056461.1	M6	red	0.284323	0.127942	0.162326	0.708785	0.518187	0.26809	0.0682857	0.0786859	0.247255	-0.149868	0.260528	-0.561252	0.025286	-0.139352	-0.0442295	0.048197	-0.11944	-0.384976	-0.558049	-0.41462	-0.391641	-0.274092	-0.446243	-0.229122	-0.165523	-0.220037	-0.196285	-0.229661	red|0.7088
MAG|NP_001186145.1	M6	red	0.0732914	-0.0338274	0.271575	0.707233	0.432511	0.195627	0.146518	0.177596	0.323976	0.0926183	0.506244	-0.65944	-0.255963	-0.108195	-0.189412	0.0266086	-0.110933	-0.182982	-0.197051	-0.0991651	-0.27838	-0.209644	-0.392577	-0.0260556	-0.0540369	-0.263885	0.0543516	-0.172147	red|0.7072
PRDX3|NP_054817.2	M6	red	0.190235	0.0313933	0.645677	0.707134	0.546172	0.185132	-0.0331357	0.250354	0.0926968	0.0693201	0.302886	-0.64716	-0.44092	-0.141677	-0.793784	-0.179946	-0.452119	-0.34477	-0.106248	-0.356812	-0.184619	-0.281521	-0.724397	0.00409775	0.415554	0.170837	-0.0876227	-0.0430819	red|0.7071
PSMA6|NP_002782.1	M6	red	0.028296	0.630248	0.251489	0.690417	0.595132	0.0245765	-0.0871765	0.17382	0.195795	-0.188646	0.361015	-0.584071	-0.00182241	-0.143371	-0.0182724	-0.0656068	-0.307712	-0.428619	-0.489215	-0.684316	-0.474133	-0.446499	-0.487293	-0.404476	-0.280087	-0.486871	-0.430101	-0.286499	red|0.6904
SEC23A|NP_006355.2	M6	red	0.303685	0.39069	0.576121	0.689221	0.650448	0.0665277	-0.221388	0.187873	-0.0391673	-0.164955	0.25386	-0.726629	-0.172008	-0.14353	-0.503256	-0.257479	-0.58501	-0.69912	-0.570621	-0.52712	-0.677403	-0.409116	-0.644977	-0.395827	0.115859	-0.0380946	-0.525522	-0.418063	red|0.6892
ENPP6|NP_699174.1	M6	red	0.361829	0.0955484	0.161148	0.688667	0.315411	0.233533	0.599824	0.432125	0.421566	0.307508	0.237386	-0.521303	-0.265623	0.0557098	-0.350502	0.393993	0.0550297	-0.276075	-0.218157	-0.191796	0.14858	-0.203175	-0.553741	-0.192051	0.0477785	0.18249	0.119767	-0.379101	red|0.6887
SLC9A3R1|NP_004243.1	M6	red	0.304077	0.333905	0.142942	0.680922	0.426289	0.0740178	0.0857916	0.259116	0.410907	0.169696	0.452281	-0.497184	-0.130589	0.0872334	-0.281946	0.0865157	-0.104428	-0.0467953	-0.104751	-0.394061	-0.0531989	-0.162845	-0.368219	-0.207093	0.0124467	-0.267885	-0.153884	-0.242532	red|0.6809
PSMB8|NP_004150.1	M6	red	0.504035	0.420669	0.0207988	0.679017	0.158329	-0.0856325	0.407539	0.173832	0.237324	0.147887	0.290844	-0.532173	0.283766	0.278511	0.0446377	0.328831	0.0205413	-0.443594	-0.397355	-0.297622	-0.119732	-0.0899717	-0.284278	-0.293411	0.0505515	-0.0815211	-0.320483	-0.774476	red|0.679
FTH1|NP_002023.2	M6	red	0.499707	0.382019	0.561846	0.675126	0.588839	0.178028	0.0880777	0.401863	0.288248	0.228672	0.235012	-0.512905	-0.345189	-0.0172561	-0.70643	-0.125811	-0.280667	-0.468984	-0.181353	-0.522101	-0.246939	-0.384583	-0.742193	-0.096145	0.380166	0.150466	-0.402328	-0.118871	red|0.6751
ALDOC|NP_005156.1	M6	red	0.405017	0.601053	0.0780989	0.670688	0.444201	0.0901859	0.441759	0.361274	0.555472	0.451643	0.407744	-0.494886	-0.00943819	0.248601	-0.0259263	0.322234	0.207985	-0.291939	-0.125132	-0.630999	-0.107557	-0.340917	-0.578712	-0.293747	-0.0243478	-0.218718	-0.387522	-0.279698	red|0.6707
RAP1A|NP_002875.1	M6	red	0.325636	0.188919	0.136852	0.670028	0.48929	0.256584	-0.0635628	0.00675656	0.163518	-0.243241	0.254415	-0.509113	0.13252	-0.128118	-0.0243797	0.0147927	-0.169792	-0.367869	-0.602009	-0.43701	-0.414317	-0.229355	-0.362365	-0.250957	-0.183195	-0.297227	-0.315019	-0.247996	red|0.67
PSMB2|NP_002785.1	M6	red	0.034195	0.500697	0.0832879	0.667874	0.420595	-0.100639	-0.0905692	-0.0345386	0.130252	-0.0716751	0.613658	-0.656408	0.182589	0.0884952	0.188747	0.116977	-0.129794	-0.254875	-0.316945	-0.516323	-0.386523	-0.220322	-0.313634	-0.430993	-0.247521	-0.654163	-0.389996	-0.34238	red|0.6679
MPP1|NP_001159932.1	M6	red	0.518354	0.315537	0.35783	0.665159	0.525919	0.261665	0.043398	0.237171	0.162366	0.122998	0.257648	-0.555448	-0.155525	0.00839009	-0.507995	0.0758138	-0.250039	-0.389643	-0.337262	-0.57304	-0.272563	-0.258442	-0.59537	-0.318646	0.0799751	0.0093436	-0.376397	-0.201309	red|0.6652
HADHA|NP_000173.2	M6	red	-0.00065913	-0.0116576	0.430358	0.663128	0.586343	0.350713	0.067562	0.312602	0.153141	-0.291155	0.158861	-0.527331	-0.563774	-0.550496	-0.577223	-0.189875	-0.485909	-0.319698	-0.448658	-0.17456	-0.312838	-0.358093	-0.503829	-0.147677	-0.254795	0.0147402	0.15652	-0.00365463	red|0.6631
HNRNPA2B1|NP_112533.1	M6	red	0.340763	0.527173	0.00371295	0.649784	0.34299	0.119539	0.365768	0.259905	0.488896	0.409218	0.620764	-0.467941	-0.0997808	0.199166	-0.0607115	0.325265	0.212958	-0.0685021	0.0245345	-0.273595	-0.0201545	-0.163945	-0.358191	-0.367353	-0.182815	-0.392779	-0.256017	-0.202112	red|0.6498
C14orf166|NP_057123.1	M6	red	0.330769	0.161173	0.443476	0.634654	0.253039	-0.116511	0.169024	0.145663	0.127361	0.299626	0.491757	-0.659606	-0.213886	0.179598	-0.373351	0.0319847	-0.153931	-0.360922	-0.0744482	-0.0105302	-0.207918	-0.0822268	-0.382795	-0.162238	0.347107	-0.0166504	-0.0328082	-0.399089	red|0.6347
TPR|NP_003283.2	M6	red	0.588928	0.065541	0.462821	0.629088	0.320421	0.278831	0.196698	0.210069	0.141488	0.133643	0.0808509	-0.3796	-0.212774	-0.00869948	-0.673436	0.00367225	-0.180338	-0.382561	-0.207572	-0.17894	0.0257961	-0.117756	-0.546448	-0.0224615	0.448526	0.359891	-0.077301	-0.157793	red|0.6291
FTL|NP_000137.2	M6	red	0.548161	0.11494	0.31189	0.628146	0.331852	0.0306762	0.0857402	0.118117	0.0449482	-0.0389074	0.159969	-0.455273	-0.141499	-0.00604353	-0.571197	0.00547568	-0.300166	-0.329181	-0.29496	-0.289649	-0.0706735	-0.0482795	-0.416228	-0.240419	0.264188	0.226839	-0.0744614	-0.248377	red|0.6281
IGSF8|NP_443100.1	M6	red	0.0515208	0.266962	0.128466	0.625333	0.288069	-0.00051764	0.436768	0.303397	0.144336	-0.140144	0.199068	-0.569792	-0.238272	-0.237688	-0.0884487	0.185045	-0.244062	-0.450177	-0.546778	-0.0767153	-0.259347	-0.241506	-0.274005	-0.471517	-0.45847	-0.061823	0.169893	-0.561021	red|0.6253
MRPL49|NP_004918.1	M6	red	0.46877	0.199085	-0.228186	0.618984	0.0971103	0.0752857	0.328693	0.0123053	0.348593	0.311572	0.68012	-0.434574	0.224022	0.391091	0.0475262	0.533514	0.316391	0.115551	0.0418032	-0.0718726	0.245542	0.148467	-0.143204	-0.260336	-0.0261671	-0.379797	-0.205646	-0.354892	red|0.619
PSMA7|NP_002783.1	M6	red	-0.175936	0.45665	0.215858	0.614723	0.572807	-0.145822	-0.0121247	0.252962	0.275594	-0.104754	0.327767	-0.647074	-0.092761	-0.144166	0.0930295	-0.110292	-0.308408	-0.385173	-0.403037	-0.686628	-0.565271	-0.481814	-0.450905	-0.270939	-0.2814	-0.429368	-0.236743	-0.317279	red|0.6147
BAG6|NP_004630.3	M6	red	0.314302	0.2274	-0.0257492	0.612103	0.154305	0.0682187	0.366481	0.137697	0.161978	0.170441	0.359668	-0.484497	0.0134375	0.191199	-0.204029	0.451842	-0.0066121	-0.0859339	-0.135203	-0.230013	0.217684	0.0300739	-0.305347	-0.429589	-0.0748602	-0.0379184	0.0152704	-0.446752	red|0.6121
ATG3|NP_071933.2	M6	red	0.34471	0.546041	0.0356257	0.579899	0.443007	0.22844	0.112539	0.20744	0.417752	-0.0727233	0.252587	-0.251268	0.158502	-0.052786	0.0830243	0.105418	0.0646095	-0.276791	-0.429277	-0.551361	-0.185431	-0.349299	-0.3527	-0.110453	-0.20631	-0.447293	-0.503703	-0.127956	red|0.5799
CRKL|NP_005198.1	M6	red	0.436212	0.282402	0.367707	0.569838	0.332907	-0.00829783	-0.268919	-0.0167	-0.0742527	-0.0978466	0.404783	-0.409433	-0.0124024	0.0698404	-0.58997	-0.116713	-0.364568	-0.19639	-0.0939356	-0.304529	-0.0590042	-0.027177	-0.373237	-0.142018	0.392069	-0.100623	-0.440049	-0.127293	red|0.5698
EIF2B2|NP_055054.1	M6	red	0.373931	0.202998	0.138429	0.561864	0.303259	0.0659707	-0.00226884	0.0699645	-0.0228963	-0.239659	0.225366	-0.512651	0.0199022	-0.0281947	-0.206549	0.0932418	-0.287539	-0.446407	-0.621358	0.017765	-0.261094	-0.0806696	-0.240678	-0.603991	-0.122152	-0.0457225	-0.163343	-0.676894	red|0.5619
DARS|NP_001340.2	M6	red	0.229528	0.250406	0.216935	0.541977	0.209349	-0.189184	0.367325	0.301274	0.349172	0.597621	0.45009	-0.63889	0.00665449	0.467216	-0.044715	0.346906	0.128015	-0.273778	0.0519074	-0.41245	-0.0441066	-0.183383	-0.493192	-0.0618903	0.377987	-0.0720103	-0.159101	-0.490055	red|0.542
CMPK1|NP_057392.1	M6	red	0.0338772	-0.110811	0.588034	0.541922	0.365742	-0.200992	-0.148885	0.0848931	-0.067645	0.00433675	0.258874	-0.62902	-0.241436	-0.00472552	-0.589433	-0.262108	-0.490597	-0.31714	-0.0163516	-0.372703	-0.215288	-0.168457	-0.559251	0.184376	0.632898	0.190956	-0.0381883	-0.119858	red|0.5419
P2RX7|NP_002553.3	M6	red	0.306112	-0.135825	0.199268	0.518409	0.199237	0.0459255	0.144563	-0.0384642	0.024839	-0.127872	0.221528	-0.440181	-0.117969	-0.0802821	-0.309543	-0.0142934	-0.198288	-0.264455	-0.320897	0.132288	-0.118235	0.0240507	-0.201494	-0.149743	0.11558	0.108352	0.121092	-0.300214	red|0.5184
NEBL|NP_001166955.1	M6	red	-0.11528	0.358187	0.20636	0.498953	0.339214	-0.114155	0.178483	0.251676	0.364607	0.271451	0.241356	-0.545283	0.0306162	0.158269	0.119792	0.0228399	-0.0767101	-0.264408	-0.118949	-0.579791	-0.288246	-0.352144	-0.423852	-0.023715	0.0724425	-0.219908	-0.155457	-0.417772	red|0.499
GDPD1|NP_872375.2	M6	red	0.528311	-0.0973939	0.0811708	0.479323	0.197351	0.250306	0.148114	0.231445	0.277822	0.0436599	0.174323	-0.2902	-0.0512308	0.0439416	-0.317458	0.159288	-0.0291782	-0.133465	-0.308636	0.070341	0.0478089	-0.00364597	-0.181835	-0.00988224	0.135477	0.0543219	-0.0520358	-0.364406	red|0.4793
ARL6IP5|NP_006398.1	M6	red	0.284132	0.38245	0.205594	0.46641	0.213141	-0.162832	0.18352	0.158982	-0.047676	0.157043	0.297275	-0.512926	-0.122521	0.147629	-0.373917	0.18662	-0.259808	-0.297472	-0.121056	-0.340712	-0.0998697	-0.0696448	-0.352976	-0.483912	0.0332752	0.0663217	-0.180399	-0.40874	red|0.4664
SNTA1|NP_003089.1	M6	red	0.395669	0.0253491	0.442439	0.458123	0.242422	0.0670647	0.393849	0.455741	0.34468	0.403586	0.100953	-0.399742	-0.324525	0.0912881	-0.433123	0.076112	-0.0266626	-0.397138	-0.127728	-0.108757	-0.06654	-0.242545	-0.473501	0.193214	0.432059	0.286425	0.0353294	-0.269427	red|0.4581
CADM4|NP_660339.1	M6	red	-0.320487	0.1526	0.111796	0.445557	0.213796	-0.266155	0.069704	0.0858227	0.115275	-0.117093	0.265578	-0.496066	-0.104173	-0.108637	0.109512	-0.0708421	-0.260904	-0.142749	-0.173341	-0.181251	-0.248852	-0.167281	-0.130519	-0.192791	-0.207433	-0.256996	0.229957	-0.359175	red|0.4456
GSTK1|NP_001137151.1	M6	red	0.270458	-0.170272	0.378145	0.445157	0.107695	-0.073429	-0.102288	-0.0416666	-0.230428	-0.0302516	0.375745	-0.511021	-0.0384853	0.110109	-0.527046	0.0323688	-0.339127	-0.232026	-0.0665706	0.00952026	-0.0259074	0.0822471	-0.287425	0.0791152	0.495857	0.0899874	-0.170143	-0.279903	red|0.4452
XPO7|NP_055839.3	M6	red	0.325476	0.153476	0.00231081	0.443591	0.297802	0.435054	0.317686	-0.0257965	0.193665	0.0287808	0.191281	-0.201684	-0.181459	-0.133721	-0.1439	0.195972	0.18229	-0.165397	-0.224398	0.0655785	0.0315682	-0.0727311	-0.327252	-0.532816	-0.285614	0.0176872	0.0734104	0.082408	red|0.4436
TRIM2|NP_056086.2	M6	red	0.142688	0.562517	0.0626374	0.434874	0.0825271	-0.262788	0.250147	0.261186	0.377857	0.573808	0.492541	-0.461595	0.232286	0.530098	0.17778	0.281352	0.152885	-0.105061	0.164949	-0.456539	-0.0458862	-0.136946	-0.229459	-0.00129518	0.217584	-0.380456	-0.399056	-0.548214	red|0.4349
ACAT2|NP_005882.2	M6	red	0.0360089	0.0194412	0.357218	0.431547	0.132838	-0.261596	0.155712	0.171388	-0.180377	-0.0680043	0.17995	-0.612433	-0.298559	-0.0755733	-0.331065	0.0470699	-0.447587	-0.43217	-0.358332	0.0561724	-0.25712	-0.0613362	-0.20188	-0.372154	-0.0134177	0.153903	0.282413	-0.570372	red|0.4315
NSFL1C|NP_001193665.1	M6	red	-0.0666644	0.185415	0.08381	0.428131	0.151251	-0.259219	-0.203486	-0.146774	0.0282603	-0.119027	0.426943	-0.393702	0.0347593	0.0549954	0.000624921	-0.137893	-0.219404	0.055955	-0.0178062	-0.0429312	-0.126361	0.07466	0.0150509	-0.244614	-0.00632232	-0.36551	0.0917468	-0.243747	red|0.4281
DNAJC11|NP_060668.2	M6	red	-0.102719	0.147924	0.258948	0.418024	0.14752	-0.2317	0.0868596	0.169463	0.0447624	0.12647	0.288204	-0.580054	0.0439638	0.0976076	-0.0167377	0.00717546	-0.283367	-0.270009	-0.110176	-0.397618	-0.352806	-0.176548	-0.219804	0.158367	0.0990375	-0.184992	-0.177521	-0.447881	red|0.418
HMX3|NP_001099044.1	M6	red	0.339671	0.315598	-0.121478	0.375001	0.0674921	-0.106863	-0.278916	-0.214698	-0.223672	-0.418687	0.264379	-0.20761	0.327338	0.0459469	-0.105315	0.0835589	-0.299362	-0.0210671	-0.334576	-0.165679	0.00538814	0.198432	0.115005	-0.477015	-0.176143	-0.303002	-0.299505	-0.377245	red|0.375
HLA-DQB1|NP_001230891.1	M6	red	0.311284	0.0739249	-0.0615612	0.340257	0.141015	0.279054	-0.283038	-0.309218	-0.0972822	-0.129162	0.401629	-0.167551	0.0742724	-0.00971206	-0.233864	0.00861255	-0.0921191	0.244009	0.0362031	0.0233287	0.00441581	0.259352	0.0547368	-0.360701	-0.183577	-0.293407	-0.149167	0.131787	red|0.3403
ALAD|NP_000022.3	M6	red	0.12853	-0.0500122	0.107672	0.33683	0.189537	0.126452	0.357567	0.418822	0.44821	0.439202	0.33803	-0.363465	-0.224197	0.165016	-0.083755	0.381898	0.20261	-0.0254166	-0.0122488	-0.133318	0.104379	-0.195748	-0.307822	0.159912	0.0667416	-0.15959	0.0734744	-0.156181	red|0.3368
CAPN5|NP_004046.2	M6	red	-0.224584	0.214497	-0.0437094	0.334098	0.261395	0.0700875	0.0273705	0.0763387	0.283155	0.00989309	0.236908	-0.332646	0.0573368	-0.0215878	0.366565	0.0553697	0.0559777	-0.0902433	-0.216367	-0.186309	-0.26018	-0.227755	-0.140847	-0.252751	-0.341697	-0.418866	0.0114704	-0.258792	red|0.3341
ZMYM2|NP_003444.1	M6	red	0.151128	0.162514	0.186734	0.322413	-0.0583545	-0.12742	0.0735835	0.0613334	-0.248498	-0.0338804	0.228606	-0.483098	0.112665	0.148058	-0.0965923	0.213704	-0.286904	-0.391933	-0.37401	0.157797	-0.184213	0.0524519	-0.0268971	-0.343162	-0.0157445	-0.0455665	-0.119115	-0.811294	red|0.3224
KPNA1|NP_002255.3	M6	red	0.296808	0.300057	0.0921762	0.257185	0.210427	-0.112147	-0.321971	-0.1045	0.172261	0.0484558	0.359053	-0.0942912	0.200391	0.159939	-0.0306919	-0.215723	-0.0014759	0.0719063	0.124113	-0.379821	-0.176084	-0.0239644	-0.0528019	0.19961	0.261819	-0.42153	-0.494746	0.188204	red|0.2572
XRN2|NP_036387.2	M10	purple	-0.221525	-0.258503	-0.52315	-0.511974	-0.61296	-0.386502	-0.102959	-0.494934	-0.0972755	0.360138	0.270684	0.411757	0.463553	0.574202	0.528808	0.294888	0.579993	0.820361	0.899548	0.194287	0.631372	0.563785	0.552865	0.362467	0.27843	-0.300759	0.148398	0.429371	purple|0.8995
ACLY|NP_942127.1	M10	purple	-0.199468	-0.327274	-0.37091	-0.487421	-0.66639	-0.436179	-0.256115	-0.591226	-0.291333	0.357255	0.300945	0.26566	0.508489	0.650097	0.431486	0.192237	0.410545	0.70785	0.870801	0.347622	0.486447	0.653342	0.581793	0.305343	0.449225	-0.216018	0.119095	0.191168	purple|0.8708
Trypsin	M10	purple	0.129094	-0.0224138	-0.171927	-0.243997	-0.464447	-0.252352	0.0353635	-0.216894	0.00472268	0.763484	0.38326	0.0950064	0.32861	0.750668	0.178974	0.319788	0.482192	0.493247	0.867463	0.0741621	0.412462	0.428272	0.245194	0.306296	0.533751	-0.136194	-0.139819	0.102431	purple|0.8675
CALR|NP_004334.1	M10	purple	-0.152044	-0.312073	-0.222881	-0.330819	-0.636273	-0.578582	0.0311582	-0.31194	-0.19826	0.439652	0.33308	0.12692	0.308255	0.605645	0.199801	0.273334	0.313952	0.570443	0.861973	0.237749	0.565837	0.538436	0.417848	0.519006	0.576396	-0.077182	0.17762	0.117744	purple|0.862
SEPT7|NP_001011553.2	M10	purple	-0.137196	-0.048884	-0.0939765	-0.273817	-0.261248	-0.248128	-0.109274	-0.155303	0.173934	0.686865	0.345495	0.102229	0.216057	0.588086	0.283679	0.0546773	0.444737	0.489442	0.853655	-0.0406908	0.202009	0.203006	0.14994	0.476874	0.51239	-0.259801	-0.134983	0.281153	purple|0.8537
KRT10|	M10	purple	-0.281901	-0.402903	-0.048553	-0.35856	-0.407026	-0.476083	-0.104054	-0.0799991	-0.0066752	0.558422	0.320038	0.0295596	0.0785978	0.541784	0.0800117	0.111485	0.215679	0.555054	0.852044	0.117794	0.358521	0.306503	0.247147	0.680781	0.643652	-0.0978394	0.133221	0.150089	purple|0.852
LARS|NP_064502.9	M10	purple	-0.108964	-0.138585	-0.220938	-0.259609	-0.345684	-0.369239	-0.445819	-0.466213	-0.0797454	0.381693	0.461099	0.122747	0.418492	0.599606	0.274221	0.0298579	0.290808	0.717884	0.849021	-0.0532778	0.307153	0.462507	0.380522	0.382759	0.483192	-0.445566	-0.118583	0.342698	purple|0.849
CRAT|NP_000746.2	M10	purple	-0.0337627	0.104357	-0.333979	-0.371466	-0.437967	-0.394167	-0.221299	-0.32525	0.0318501	0.555455	0.356619	0.252551	0.494481	0.709728	0.440905	0.154658	0.470369	0.628644	0.84842	-0.0562425	0.329667	0.401699	0.416239	0.306366	0.394	-0.403653	-0.251786	0.191675	purple|0.8484
CPSF3|NP_057291.1	M10	purple	-0.363195	-0.0278507	-0.139435	-0.38149	-0.364855	-0.478651	-0.405024	-0.334757	-0.197725	0.351781	0.440247	0.0938122	0.279098	0.496886	0.270628	0.0190245	0.155055	0.596836	0.829829	-0.0424618	0.197993	0.329866	0.363654	0.347309	0.334964	-0.464491	-0.157531	0.278031	purple|0.8298
PPP1R9B|NP_115984.3	M10	purple	-0.196145	-0.0821372	-0.14666	-0.105718	-0.257112	-0.235441	-0.236024	-0.256002	0.050937	0.431809	0.523876	0.0321865	0.259455	0.463197	0.228577	0.125018	0.309339	0.627776	0.823099	-0.107766	0.323832	0.289548	0.218915	0.467992	0.350354	-0.496293	-0.103531	0.380079	purple|0.8231
MLF2|NP_005430.1	M10	purple	-0.177803	-0.282717	-0.327802	-0.300831	-0.396412	-0.217175	0.0156579	-0.208532	0.0413852	0.499502	0.323002	0.161019	0.0665378	0.441259	0.200947	0.288595	0.419205	0.724896	0.821919	0.20762	0.506751	0.43148	0.34365	0.193942	0.165944	-0.167195	0.325436	0.335266	purple|0.8219
ABR|NP_001083.2	M10	purple	-0.12939	-0.087082	-0.276701	-0.486799	-0.401048	-0.129351	-0.0758503	-0.340544	-0.0456216	0.350091	-0.0385031	0.515644	0.239559	0.344314	0.234419	0.0399291	0.450516	0.585816	0.808592	0.0273268	0.487607	0.333727	0.280942	0.325602	0.315325	0.0130648	0.058796	0.607341	purple|0.8086
SRCIN1|NP_079524.2	M10	purple	0.165336	-0.362858	-0.322325	-0.129533	-0.556157	-0.385796	-0.112322	-0.513432	-0.232435	0.431999	0.539978	-0.00979369	0.437428	0.727657	0.115768	0.403565	0.354393	0.678154	0.803116	0.249335	0.59651	0.728952	0.41452	0.20461	0.536698	-0.168683	0.100427	0.0737633	purple|0.8031
HNRNPL|NP_001524.2	M10	purple	0.143921	-0.291066	-0.337895	-0.354201	-0.662694	-0.490446	-0.0916966	-0.445046	-0.222806	0.423149	0.310828	0.227734	0.458738	0.747907	0.180518	0.314388	0.408967	0.609849	0.802225	0.38273	0.657347	0.691577	0.489604	0.256781	0.648089	-0.0162601	0.0890548	0.0154118	purple|0.8022
NACA|NP_001106673.1	M10	purple	-0.198188	-0.0548096	-0.39148	-0.43837	-0.381985	-0.273195	-0.132167	-0.184467	0.22522	0.530078	0.286268	0.326861	0.372508	0.544496	0.55126	0.142446	0.551986	0.702233	0.799437	-0.0208232	0.302695	0.27377	0.436476	0.534972	0.227605	-0.472659	-0.122487	0.328119	purple|0.7994
CHTOP|NP_001193541.1	M10	purple	0.117496	-0.150345	-0.349551	-0.147177	-0.5303	-0.409632	0.139637	-0.283977	-0.044887	0.561096	0.510009	0.0371664	0.410429	0.727886	0.240486	0.487356	0.490383	0.547704	0.798912	0.144787	0.586122	0.527542	0.309854	0.294247	0.465756	-0.198087	-0.051153	0.0322972	purple|0.7989
PARP1|NP_001609.2	M10	purple	-0.116222	-0.402041	-0.175373	-0.594287	-0.42713	-0.0996434	0.0372817	-0.00651124	0.0565733	0.611483	-0.0262654	0.369543	-0.0445519	0.409082	0.0394037	0.130815	0.401653	0.547505	0.798215	0.321345	0.413525	0.293448	0.276972	0.469412	0.413609	0.200357	0.179142	0.316156	purple|0.7982
OAT|NP_000265.1	M10	purple	-0.15974	-0.487793	-0.110423	-0.332281	-0.547825	-0.328253	0.0467868	-0.256572	-0.176832	0.399978	0.264012	0.146566	0.029192	0.365037	0.0325023	0.168533	0.269201	0.553997	0.797365	0.449785	0.469698	0.494218	0.396155	0.516935	0.434171	0.0232219	0.376389	0.302401	purple|0.7974
ATP8A1|NP_006086.1	M10	purple	-0.356709	-0.00350206	-0.350273	-0.52473	-0.476019	-0.58173	-0.118905	-0.193301	0.0031932	0.309832	0.143888	0.396805	0.295529	0.459278	0.455744	0.0709483	0.373294	0.591893	0.7856	0.059262	0.439896	0.28877	0.437579	0.403126	0.310524	-0.259196	0.0379443	0.267627	purple|0.7856
LNPEP|NP_787116.2	M10	purple	-0.223263	-0.217001	-0.231996	-0.0778364	-0.314326	-0.0510119	0.0364646	-0.174172	0.127946	0.478655	0.509626	0.0156774	0.148878	0.407075	0.201877	0.324904	0.399965	0.689012	0.7712	0.131136	0.488962	0.332101	0.232844	0.413474	0.174327	-0.403476	0.133674	0.277402	purple|0.7712
PSMC2|NP_002794.1	M10	purple	0.0876384	-0.0390011	-0.606166	-0.502288	-0.573439	-0.326098	-0.256811	-0.515033	-0.066481	0.417912	0.301075	0.411148	0.675961	0.761533	0.581481	0.296251	0.609755	0.742511	0.768176	0.179124	0.475988	0.600953	0.610343	0.101892	0.273035	-0.374734	-0.21525	0.143279	purple|0.7682
MAT2A|NP_005902.1	M10	purple	-0.115962	0.139442	-0.45506	-0.353439	-0.331773	-0.28128	0.0345435	-0.0887298	0.325289	0.631063	0.298563	0.282862	0.419414	0.633871	0.611471	0.307089	0.651189	0.616509	0.753649	-0.198039	0.360749	0.195435	0.306286	0.372198	0.175807	-0.467137	-0.213743	0.227564	purple|0.7536
MCM4|NP_005905.2	M10	purple	-0.189137	-0.175986	-0.261369	-0.398295	-0.464804	-0.440154	-0.11372	-0.409283	-0.251946	0.200688	0.246916	0.290091	0.18441	0.381521	0.172635	0.150603	0.305219	0.543439	0.750436	0.258393	0.532924	0.448354	0.348116	0.1499	0.331093	-0.0951917	0.168724	0.396773	purple|0.7504
DLD|NP_000099.2	M10	purple	-0.237901	0.0719566	-0.0470982	-0.228736	-0.123051	-0.198744	-0.142389	-0.208104	0.0127907	0.284206	0.206221	0.236641	-0.0506864	0.178829	0.0286021	-0.103256	0.222609	0.466646	0.74339	-0.074324	0.289693	0.144756	0.0720766	0.195921	0.236384	-0.15393	0.0561798	0.632887	purple|0.7434
MYO5A|NP_001135967.1	M10	purple	-0.0942734	-0.358307	0.155588	-0.107862	-0.140626	-0.134062	-0.12789	-0.123783	-0.0598134	0.442897	0.307597	-0.0481156	-0.221422	0.276331	-0.31588	0.00809789	0.0898405	0.445861	0.739535	0.107373	0.326303	0.261749	-0.0208366	0.333134	0.534533	0.0761384	0.25953	0.444306	purple|0.7395
PTPRS|NP_570924.2	M10	purple	-0.437787	-0.451687	-0.331758	-0.663896	-0.512959	-0.214942	0.0267672	-0.0931248	-0.0121715	0.284251	0.00638842	0.480083	0.0335476	0.190884	0.307047	0.163328	0.388662	0.682783	0.729966	0.28637	0.480933	0.280673	0.475691	0.678727	0.11055	-0.11572	0.286984	0.52198	purple|0.73
RCN2|NP_002893.1	M10	purple	-0.163836	-0.41768	-0.153256	-0.322909	-0.547787	-0.34016	0.16248	-0.253447	-0.288302	0.29834	0.126432	0.180478	-0.0247398	0.32682	-0.0950083	0.295161	0.214211	0.500986	0.729646	0.397566	0.688316	0.503345	0.274735	0.209762	0.382476	0.250795	0.50428	0.255652	purple|0.7296
NCAPG|NP_071741.2	M10	purple	-0.444575	-0.0779653	-0.246339	-0.396024	-0.19026	-0.24424	-0.0869663	-0.0163006	0.169376	0.442098	0.305607	0.159229	0.0424105	0.286009	0.364439	0.1045	0.32913	0.585954	0.72103	-0.15766	0.146406	0.0628246	0.229882	0.462386	0.0156962	-0.442516	-0.0605097	0.442875	purple|0.721
CSDE1|NP_001229822.1	M10	purple	-0.10407	-0.234275	-0.293801	-0.189405	-0.386245	-0.181598	0.13307	-0.212592	0.0260622	0.324583	0.338443	0.212482	0.00573168	0.301157	0.0900347	0.312517	0.414055	0.649088	0.719917	0.347206	0.656134	0.420061	0.301535	0.174153	0.144575	-0.142271	0.377589	0.389137	purple|0.7199
SSR1|NP_003135.2	M10	purple	-0.132282	-0.460978	-0.536805	-0.513249	-0.613903	-0.330108	0.0376078	-0.34172	-0.184765	0.170099	0.144714	0.420089	0.219326	0.381514	0.202268	0.391186	0.407731	0.775122	0.712467	0.403931	0.78523	0.595208	0.536255	0.242781	0.174289	-0.012581	0.348277	0.327242	purple|0.7125
DNAJA3|NP_001128582.1	M10	purple	0.124053	0.0285324	-0.390673	-0.276046	-0.293278	0.0387393	-0.13347	-0.22603	0.236981	0.642541	0.419723	0.220721	0.41657	0.636512	0.437133	0.279807	0.633727	0.632094	0.708949	0.06592	0.265864	0.328307	0.337586	0.225768	0.168881	-0.480672	-0.318232	0.211907	purple|0.7089
CARNS1|NP_065862.1	M10	purple	-0.175912	-0.366937	-0.0947495	-0.0544291	-0.239776	-0.328559	0.0203205	-0.0876053	0.0840423	0.529207	0.429308	-0.184119	0.0384894	0.515902	0.0311038	0.233952	0.232129	0.483238	0.705308	0.100665	0.380794	0.294325	0.063101	0.317623	0.505711	-0.0668884	0.229955	0.0107642	purple|0.7053
SPTBN4|NP_066022.2	M10	purple	0.428567	-0.080695	-0.156049	-0.116192	-0.497084	-0.157117	-0.093058	-0.437921	-0.276832	0.484843	0.379447	0.0941431	0.359165	0.689343	-0.128688	0.3367	0.311023	0.470954	0.703835	0.290578	0.56627	0.667626	0.293285	-0.0301493	0.560092	0.0311052	-0.0758256	0.0387716	purple|0.7038
EIF4G2|NP_001036024.3	M10	purple	-0.35136	0.0384263	-0.198256	-0.512386	-0.425882	-0.550637	-0.334618	-0.241862	-0.130515	0.186656	0.17873	0.353418	0.325632	0.387022	0.361196	-0.0760563	0.188951	0.50681	0.698363	0.00469125	0.262086	0.247121	0.445594	0.495714	0.34602	-0.368745	-0.169478	0.276064	purple|0.6984
EMC1|NP_055862.1	M10	purple	-0.0940245	-0.317087	-0.0671967	-0.172256	-0.269148	-0.0151731	0.0472525	-0.292442	-0.012646	0.329362	0.216438	0.181765	-0.0694342	0.210734	-0.0844971	0.0924949	0.301399	0.541516	0.690678	0.273132	0.498867	0.336766	0.152028	0.292565	0.310192	0.0141129	0.346397	0.512928	purple|0.6907
PROSC|NP_009129.1	M10	purple	-0.0948976	-0.311855	-0.0889175	0.0105355	-0.180614	-0.275514	0.021636	-0.155832	0.013	0.572329	0.590562	-0.290899	0.0309521	0.527948	0.0297968	0.357925	0.264053	0.460436	0.688994	-0.0275762	0.300212	0.298095	0.00803649	0.18661	0.372912	-0.201689	0.130576	0.140776	purple|0.689
GPHN|NP_001019389.1	M10	purple	-0.512456	-0.260549	-0.26206	-0.728486	-0.309996	-0.258458	-0.258359	-0.137436	-0.0554615	0.110107	-0.0625685	0.544215	-0.0353462	0.0529774	0.247473	-0.144065	0.219522	0.622798	0.685753	0.116097	0.25075	0.144745	0.402305	0.508899	0.0586831	-0.157307	0.101617	0.681085	purple|0.6858
CBX3|NP_009207.2	M10	purple	-0.214715	-0.104397	-0.248211	-0.515758	-0.433912	-0.316601	-0.0512712	-0.125655	-0.000248181	0.457357	0.0912711	0.320093	0.212443	0.516638	0.303904	0.180463	0.411367	0.459179	0.680563	0.226976	0.435626	0.264117	0.290111	0.252952	0.37989	-0.0600825	0.0309935	0.0998025	purple|0.6806
CARHSP1|NP_001035941.1	M10	purple	-0.216308	-0.00626569	0.0132529	-0.102967	-0.0370838	0.0615518	-0.0877895	-0.0194352	0.148283	0.487101	0.464662	-0.0100082	-0.117346	0.253179	-0.0140438	0.0996793	0.265369	0.443776	0.676671	0.0535485	0.198583	0.0603142	-0.0237121	0.234479	0.154196	-0.342216	-0.0970958	0.384044	purple|0.6767
HNRNPK|NP_002131.2	M10	purple	-0.388307	-0.236295	-0.131382	-0.413175	-0.360829	-0.362991	-0.4206	-0.41382	-0.431547	-0.03199	0.148735	0.215712	0.137358	0.18599	-0.0125823	-0.0964152	-0.0817345	0.552687	0.666008	0.102265	0.31703	0.394178	0.341444	0.214968	0.259705	-0.0936687	0.0731921	0.375805	purple|0.666
TNC|NP_002151.2	M10	purple	-0.0540896	-0.249201	-0.011314	0.0797299	-0.110101	-0.338584	-0.13066	-0.116255	0.134749	0.467346	0.465888	-0.210353	0.062966	0.49792	-0.0477766	0.119152	0.156385	0.494534	0.662257	-0.123396	0.329469	0.265821	0.010363	0.335849	0.572625	-0.169284	0.158751	0.121537	purple|0.6623
PLXNB1|NP_001123554.1	M10	purple	0.166113	-0.145114	-0.150809	-0.283499	-0.579417	-0.34498	-0.0422624	-0.305104	-0.356113	0.262285	0.191511	0.221787	0.186218	0.462573	-0.17438	0.236906	0.126639	0.46828	0.64331	0.392225	0.613317	0.605912	0.413351	0.0974447	0.440397	0.126019	0.133301	0.0392168	purple|0.6433
PRPF8|NP_006436.3	M10	purple	-0.111657	-0.486532	-0.167489	-0.272869	-0.649513	-0.393145	0.136405	-0.365114	-0.397937	0.215855	0.178602	0.120605	0.226355	0.420748	0.00633806	0.378912	0.210912	0.441637	0.643125	0.374217	0.704856	0.575499	0.322984	0.379637	0.509985	0.175608	0.368476	0.114768	purple|0.6431
CECR5|NP_060299.4	M10	purple	0.0280165	-0.407087	-0.462899	-0.155193	-0.453807	-0.0652361	0.139857	-0.196452	0.180375	0.467341	0.310153	0.159906	0.329243	0.531686	0.3595	0.506896	0.594729	0.691453	0.629374	0.228521	0.657437	0.462811	0.361363	0.350158	0.221326	-0.216144	0.265857	0.127677	purple|0.6294
HIP1R|NP_003950.1	M10	purple	0.0139486	0.188982	-0.22242	-0.299811	-0.173771	-0.196755	-0.447056	-0.431546	-0.00162071	0.293368	0.209882	0.292323	0.418715	0.46253	0.348716	-0.14683	0.338992	0.463595	0.627398	-0.120359	0.087515	0.270747	0.266254	0.0633146	0.304778	-0.34015	-0.324633	0.370594	purple|0.6274
ANK3|NP_066267.2	M10	purple	0.152176	-0.281241	-0.101597	-0.35153	-0.612814	-0.420827	-0.272464	-0.424498	-0.443327	0.257899	0.186961	0.162033	0.348759	0.555189	-0.0418854	0.114748	0.0765498	0.441634	0.611349	0.354297	0.392431	0.651701	0.507598	0.252769	0.584501	0.055114	0.0460527	-0.0210349	purple|0.6113
PGK1|NP_000282.1	M10	purple	-0.282764	0.0458988	-0.280092	-0.3047	-0.162419	0.00935793	-0.302177	-0.193745	0.177825	0.296519	0.259981	0.289512	0.225202	0.275038	0.415292	0.0391322	0.380582	0.657285	0.60139	-0.0814545	0.222117	0.155647	0.310057	0.280285	-0.0335601	-0.56699	-0.0860665	0.459182	purple|0.6014
NCL|NP_005372.2	M10	purple	-0.232907	-0.17259	-0.0477729	0.0927646	-0.0887146	-0.240028	-0.12631	-0.246061	0.0330757	0.352266	0.654486	-0.256833	0.0248927	0.364828	0.125614	0.181772	0.224485	0.454464	0.599882	0.0781716	0.2331	0.238195	0.0433534	0.1064	0.240813	-0.426628	0.160517	0.22086	purple|0.5999
RYR2|NP_001026.2	M10	purple	0.187666	-0.0261768	0.00408263	-0.311459	-0.23787	-0.022002	-0.141397	-0.146277	0.0221371	0.388288	-0.0531425	0.357654	0.173938	0.342352	-0.113423	-0.109521	0.222391	0.329893	0.594288	-0.0395011	0.270381	0.203252	0.125161	0.462408	0.557034	0.123508	-0.239401	0.337991	purple|0.5943
COPA|NP_004362.2	M10	purple	0.353735	-0.0354716	-0.0695406	-0.0915139	-0.239851	-0.0630012	-0.308815	-0.374445	-0.242778	0.214411	0.260529	0.151077	0.237538	0.410204	-0.310154	0.0392452	0.0764041	0.438535	0.589308	0.0511681	0.400352	0.475973	0.157865	0.05093	0.50109	0.0289291	-0.242108	0.256314	purple|0.5893
CORO7-PAM16|NP_001188408.1	M10	purple	-0.188976	-0.26075	-0.393784	-0.416558	-0.35724	0.10894	0.123641	-0.0950613	0.0786158	0.43816	0.290102	0.25875	0.0777004	0.276537	0.357631	0.447223	0.55058	0.596692	0.577868	0.260158	0.374368	0.251754	0.339938	0.268082	-0.183706	-0.346408	0.0649503	0.400879	purple|0.5779
HNRNPC|NP_112604.2	M10	purple	0.0445	0.104948	-0.280271	-0.31707	-0.172869	-0.0878215	-0.321061	-0.314655	0.0816221	0.33698	0.175471	0.29599	0.428958	0.489896	0.347397	-0.0225256	0.417646	0.417913	0.565618	-0.0420273	0.158962	0.217958	0.193301	0.111745	0.325105	-0.256311	-0.393627	0.235289	purple|0.5656
PITPNB|NP_036531.1	M10	purple	-0.311218	-0.192537	-0.298104	-0.169103	-0.305338	-0.0250192	0.0364945	-0.10026	0.198749	0.381878	0.366332	0.0843152	0.126768	0.30947	0.410651	0.274815	0.427706	0.59794	0.545596	0.303506	0.348477	0.252599	0.345746	0.268241	-0.0529675	-0.441183	0.247596	0.117169	purple|0.5456
MYO6|NP_004990.3	M10	purple	0.128422	0.157712	-0.149878	-0.287674	-0.35611	-0.152791	-0.20258	-0.422034	-0.224244	0.2306	0.190337	0.320723	0.297227	0.381148	0.153927	0.103594	0.316225	0.368875	0.527631	0.138222	0.337004	0.385198	0.313222	-0.0392319	0.220929	-0.196276	-0.114408	0.34837	purple|0.5276
OGT|NP_858059.1	M10	purple	-0.311658	-0.126379	-0.395129	-0.633984	-0.344346	-0.0576102	-0.0907415	-0.105156	-0.129265	-0.0617244	-0.17034	0.583405	0.0669417	-0.0177955	0.190784	0.057851	0.196643	0.505495	0.410096	0.19934	0.367371	0.189869	0.406912	0.210593	-0.18757	-0.0507768	0.0151304	0.424942	purple|0.4101
RFTN1|NP_055965.1	M10	purple	-0.065449	0.0233573	-0.101792	-0.304732	-0.110787	0.0350951	-0.114012	-0.00493347	-0.0436551	0.196672	0.183758	0.185268	0.0278297	0.121122	0.0635598	0.154573	0.175538	0.275731	0.317369	-0.0851488	0.0966312	0.0368912	0.123119	0.235655	-0.0546986	-0.292071	-0.29124	0.371585	purple|0.3174
PSMC5|NP_002796.4	M8	pink	0.387998	0.124221	-0.667156	0.0116173	-0.595216	-0.327478	-0.00446944	-0.6182	-0.197516	0.150707	0.547755	0.0544311	0.934308	0.776413	0.630174	0.657824	0.534922	0.455207	0.288178	0.234981	0.536062	0.712205	0.587317	-0.268207	0.0571337	-0.527375	-0.243642	-0.387574	pink|0.9343
ARFGAP1|NP_060679.1	M8	pink	0.261967	0.112561	-0.48899	-0.130967	-0.658219	-0.41226	-0.0838599	-0.610242	-0.329831	0.232983	0.443378	0.05768	0.920541	0.800878	0.612011	0.521192	0.43874	0.345874	0.368463	0.195254	0.387369	0.662	0.572491	-0.0952766	0.226648	-0.430369	-0.302772	-0.379955	pink|0.9205
CAMK1|NP_003647.1	M8	pink	0.245779	-0.00343752	-0.645066	-0.29302	-0.749455	-0.346602	-0.0783996	-0.642889	-0.247427	0.281365	0.331352	0.324092	0.891038	0.815721	0.58529	0.535021	0.589295	0.655039	0.610295	0.246271	0.692693	0.786149	0.666839	0.00799779	0.271889	-0.333598	-0.124784	-0.0944496	pink|0.891
TPD52|NP_001020424.1	M8	pink	0.414793	0.293505	-0.780414	-0.227994	-0.499811	-0.0372839	-0.083623	-0.595175	-0.0692815	0.108044	0.231322	0.462894	0.885954	0.61059	0.641504	0.470478	0.654147	0.553562	0.332002	0.154201	0.542472	0.604804	0.588695	-0.342425	-0.122433	-0.430882	-0.373992	-0.0292644	pink|0.886
VAMP2|NP_055047.2	M8	pink	0.111454	0.00579369	-0.716676	-0.358474	-0.757657	-0.431564	-0.0260953	-0.562479	-0.218116	0.17857	0.333061	0.314349	0.883805	0.731301	0.778504	0.581514	0.587244	0.583178	0.432975	0.299519	0.577814	0.687638	0.762385	0.00727245	0.0455638	-0.487165	-0.114576	-0.214219	pink|0.8838
VAMP3|NP_004772.1	M8	pink	0.0697443	-0.0190969	-0.717897	-0.379735	-0.743953	-0.469862	-0.0936051	-0.567675	-0.237567	0.0830472	0.269072	0.337407	0.878176	0.680797	0.773504	0.508246	0.516007	0.585086	0.381902	0.298464	0.556118	0.681598	0.791415	0.000737103	0.037644	-0.466048	-0.0713366	-0.233682	pink|0.8782
SNAP29|NP_004773.1	M8	pink	0.189428	0.064143	-0.791639	-0.22462	-0.635661	-0.254524	-0.0970789	-0.627474	-0.158813	0.152374	0.438501	0.291766	0.866131	0.714889	0.675449	0.607619	0.601279	0.72247	0.47834	0.250776	0.672846	0.730528	0.690775	-0.214513	-0.0525459	-0.548743	-0.139704	-0.125498	pink|0.8661
PACS1|NP_060496.2	M8	pink	0.42715	-0.0391277	-0.668718	-0.137983	-0.701499	-0.268801	0.0364373	-0.597419	-0.357038	0.0848651	0.390679	0.150385	0.861286	0.721949	0.489957	0.734156	0.482194	0.432293	0.223042	0.399873	0.644346	0.78379	0.633631	-0.290107	0.0567296	-0.307487	-0.147438	-0.400316	pink|0.8613
LMAN1|NP_005561.1	M8	pink	0.326808	0.199212	-0.558811	-0.0775221	-0.552436	-0.399801	-0.184316	-0.681175	-0.412548	0.0553768	0.457513	0.0831427	0.849895	0.717746	0.440061	0.538742	0.333861	0.432847	0.327198	0.0889409	0.508725	0.70863	0.522305	-0.421444	0.094823	-0.412867	-0.270479	-0.260067	pink|0.8499
GNG3|NP_036334.1	M8	pink	0.0398401	-0.110785	-0.693941	-0.338754	-0.711403	-0.463572	0.0582947	-0.538603	-0.232289	0.166779	0.22983	0.220468	0.849741	0.687969	0.790785	0.568746	0.536816	0.473006	0.363639	0.205469	0.480122	0.624338	0.657163	0.0111734	0.0576922	-0.323905	-0.0315859	-0.264849	pink|0.8497
MAPK8IP3|NP_001035529.1	M8	pink	0.522009	0.124862	-0.636443	-0.161512	-0.575319	-0.163351	0.0158797	-0.515028	-0.231691	0.276256	0.355844	0.151787	0.838076	0.756062	0.538118	0.654999	0.552469	0.357431	0.250131	0.202292	0.400283	0.661273	0.54664	-0.343748	-0.00214486	-0.324768	-0.352141	-0.317947	pink|0.8381
SCARF1|NP_663325.1	M8	pink	0.254998	-0.0276826	-0.834713	-0.218073	-0.641153	-0.313529	0.00169379	-0.597288	-0.26205	-0.0825641	0.258027	0.288266	0.829352	0.557743	0.645322	0.638263	0.480061	0.56501	0.188554	0.275179	0.623886	0.728551	0.723166	-0.331478	-0.199801	-0.374338	-0.00345155	-0.236872	pink|0.8294
SYT7|NP_001238994.1	M8	pink	0.236805	-0.129114	-0.634051	-0.198223	-0.567572	-0.226854	-0.147672	-0.51616	-0.1007	0.23265	0.463557	0.138637	0.826605	0.752973	0.629823	0.556821	0.552201	0.580988	0.363963	0.295027	0.479934	0.642422	0.613816	0.00887866	0.138819	-0.522669	-0.208127	-0.271368	pink|0.8266
RAB1A|NP_004152.1	M8	pink	0.274353	-0.019896	-0.746	-0.189645	-0.583609	-0.164291	-0.00926547	-0.558336	-0.1798	0.216431	0.500546	0.123914	0.825024	0.698969	0.693387	0.687811	0.601519	0.526866	0.313844	0.310034	0.422132	0.663334	0.633509	-0.249946	-0.15299	-0.540243	-0.256308	-0.259773	pink|0.825
RAB1B|NP_112243.1	M8	pink	0.284848	-0.0306484	-0.737927	-0.181228	-0.583318	-0.162861	-0.00425661	-0.554685	-0.183411	0.225009	0.506469	0.109493	0.81717	0.704924	0.676374	0.693167	0.595611	0.521537	0.313182	0.31777	0.423221	0.668552	0.62677	-0.253678	-0.141018	-0.527322	-0.251408	-0.271928	pink|0.8172
PSMD12|NP_002807.1	M8	pink	0.426888	-0.0280199	-0.417787	-0.135399	-0.565047	-0.285482	-0.298713	-0.730144	-0.522043	-0.181327	0.125062	0.238021	0.799822	0.516519	0.229856	0.243066	0.165288	0.297411	0.179239	0.317721	0.448319	0.733308	0.547585	-0.285854	0.287155	-0.0513328	-0.16483	-0.254896	pink|0.7998
NDUFA12|NP_061326.1	M8	pink	0.170089	0.14718	-0.353067	0.0164204	-0.224138	-0.282169	-0.294928	-0.458208	-0.0690467	0.20276	0.429578	-0.0942805	0.795351	0.675332	0.54581	0.294367	0.314236	0.288079	0.24383	-0.288205	0.109987	0.331836	0.237957	-0.0257869	0.247877	-0.534374	-0.4717	-0.224644	pink|0.7954
CAP2|NP_006357.1	M8	pink	-0.0423089	0.178403	-0.41881	-0.388375	-0.545855	-0.55046	-0.245463	-0.47115	-0.248379	0.0323662	0.05738	0.332311	0.79093	0.561877	0.642018	0.134431	0.286584	0.317443	0.338854	-0.0198847	0.277858	0.409719	0.544268	0.12621	0.259688	-0.315668	-0.26773	-0.157603	pink|0.7909
SIRPA|NP_542970.1	M8	pink	0.0406813	-0.26749	-0.622966	-0.412836	-0.673999	-0.223071	-0.133655	-0.697153	-0.366285	0.0286329	0.238005	0.315869	0.779151	0.532965	0.673065	0.444337	0.513183	0.517311	0.368288	0.408813	0.439766	0.667593	0.673666	0.0333912	0.0372892	-0.336963	-0.06148	0.00877084	pink|0.7792
VAPA|NP_919415.2	M8	pink	0.445494	-0.0844546	-0.721401	-0.106115	-0.651592	-0.0480413	0.121781	-0.518902	-0.246214	0.0613071	0.326743	0.207249	0.77694	0.599149	0.433982	0.743617	0.511752	0.4841	0.181387	0.480932	0.681435	0.753911	0.621923	-0.296981	-0.0944391	-0.260693	-0.0926927	-0.36825	pink|0.7769
LY6H|NP_002338.3	M8	pink	0.276775	0.306902	-0.670185	-0.426091	-0.458334	-0.0966361	-0.147034	-0.38543	-0.0505625	0.106679	-0.0384599	0.568775	0.772686	0.508928	0.579812	0.291111	0.49971	0.472073	0.298467	-0.0375939	0.391853	0.424444	0.555611	-0.129021	-0.0811718	-0.292305	-0.434089	0.000593666	pink|0.7727
PSMC4|NP_006494.1	M8	pink	0.445691	0.367736	-0.399324	-0.167376	-0.427679	-0.287972	-0.26006	-0.610641	-0.388562	-0.0361714	0.205639	0.263999	0.770405	0.509955	0.344968	0.182616	0.245074	0.193375	0.20876	0.0552247	0.194594	0.529991	0.469902	-0.324732	0.109454	-0.266771	-0.52175	-0.107461	pink|0.7704
NPTX1|NP_002513.2	M8	pink	-0.00960628	0.0918008	-0.466241	-0.321419	-0.682448	-0.665789	-0.203181	-0.605411	-0.442906	0.0591614	0.318642	0.193625	0.767598	0.62436	0.567361	0.313047	0.257091	0.441628	0.477665	0.102166	0.371889	0.629815	0.66785	0.0207014	0.180763	-0.402031	-0.154977	-0.132064	pink|0.7676
PTPN9|NP_002824.1	M8	pink	0.418552	0.0611464	-0.726531	-0.369328	-0.581505	-0.152429	0.128413	-0.356091	-0.0875035	0.190694	0.0869439	0.374646	0.767069	0.604646	0.672013	0.566756	0.626988	0.301553	0.12968	0.311961	0.360069	0.519035	0.605984	-0.201596	-0.106709	-0.209146	-0.291913	-0.303257	pink|0.7671
NPTN|NP_001154835.1	M8	pink	0.116151	-0.271854	-0.688398	-0.457757	-0.870042	-0.392532	0.142474	-0.556414	-0.363264	0.146194	0.0218441	0.368142	0.764416	0.642899	0.630186	0.603118	0.52163	0.498291	0.379358	0.446212	0.666097	0.76513	0.744572	-0.0250877	0.104392	-0.0198216	0.210371	-0.252183	pink|0.7644
KLC1|NP_005543.2	M8	pink	0.128364	0.110034	-0.287787	0.0816962	-0.37765	-0.584879	-0.305707	-0.630729	-0.29552	-0.013821	0.530575	-0.0928708	0.763469	0.601979	0.397814	0.170351	0.153045	0.316725	0.361419	-0.0580405	0.249947	0.519375	0.372969	0.0363787	0.39809	-0.480214	-0.293578	-0.17449	pink|0.7635
RAB39B|NP_741995.1	M8	pink	0.37095	0.303554	-0.675382	-0.450576	-0.54422	-0.0770709	-0.0164813	-0.469592	-0.106166	0.193709	0.0350718	0.587965	0.753431	0.538946	0.627394	0.37468	0.645971	0.414335	0.341635	0.16797	0.392129	0.494141	0.597443	-0.208221	-0.113065	-0.274499	-0.40041	0.0676568	pink|0.7534
BAIAP2|NP_059344.1	M8	pink	0.363819	0.262831	-0.474502	0.0871568	-0.29497	-0.230823	-0.235994	-0.611634	-0.275023	0.0378532	0.60014	-0.0908037	0.75123	0.570189	0.482496	0.454057	0.309179	0.303184	0.142745	-0.0397021	0.14922	0.521237	0.408356	-0.452395	-0.127187	-0.641749	-0.428574	-0.176934	pink|0.7512
SERPINA3|NP_001076.2	M8	pink	0.0886892	0.311252	-0.268277	0.0690732	-0.340913	-0.588022	-0.427371	-0.608043	-0.407804	-0.145577	0.543559	-0.107604	0.747485	0.508935	0.378183	0.149375	-0.0128705	0.276242	0.225456	-0.135471	0.126884	0.477092	0.441969	-0.153965	0.150894	-0.633994	-0.402242	-0.242988	pink|0.7475
CAPRIN1|NP_976240.1	M8	pink	0.499803	0.0660665	-0.562965	-0.214937	-0.548353	-0.0795949	-0.225502	-0.639675	-0.200299	0.138503	0.301339	0.412124	0.747221	0.632837	0.323911	0.361366	0.520323	0.607926	0.470851	0.334033	0.613592	0.736879	0.5932	-0.154518	0.209846	-0.298254	-0.249269	0.0654028	pink|0.7472
RAB3C|NP_612462.1	M8	pink	0.0384629	-0.0840882	-0.51261	-0.193627	-0.491692	-0.260925	-0.418984	-0.743507	-0.428585	-0.166277	0.3909	0.166008	0.744304	0.394638	0.502987	0.222249	0.204835	0.556026	0.330653	0.14979	0.245803	0.645296	0.665754	-0.0444797	-0.0701072	-0.561212	-0.19657	0.0780451	pink|0.7443
NT5E|NP_001191742.1	M8	pink	-0.0791969	-0.209767	-0.57544	-0.287112	-0.430148	-0.188323	-0.324732	-0.705357	-0.285261	-0.234805	0.148315	0.306725	0.73887	0.315929	0.661441	0.21029	0.353408	0.50356	0.217705	0.13736	0.324562	0.509611	0.553699	0.0150703	-0.0428549	-0.416293	-0.0399287	0.163041	pink|0.7389
SRCAP|NP_006653.2	M8	pink	-0.0890414	0.330617	-0.358502	-0.0776414	-0.325401	-0.513457	-0.31807	-0.427586	-0.117582	-0.04204	0.321731	0.0813181	0.733385	0.464007	0.615988	0.0816596	0.153834	0.340673	0.249826	-0.206428	0.120003	0.3125	0.464661	0.0649899	0.0725063	-0.637016	-0.323904	-0.185236	pink|0.7334
COX6A1|NP_004364.2	M8	pink	0.208212	-0.0346	-0.446888	-0.263756	-0.399256	-0.100836	-0.497061	-0.661596	-0.339532	-0.119489	0.0577481	0.35209	0.722117	0.447169	0.275959	0.0894951	0.192012	0.513271	0.319345	0.0818088	0.393955	0.590605	0.482177	-0.152132	0.213684	-0.178011	-0.22718	0.038079	pink|0.7221
SFPQ|NP_005057.1	M8	pink	0.28389	-0.065054	-0.542782	-0.189497	-0.412541	-0.157361	-0.296569	-0.62503	-0.102005	0.0794694	0.32538	0.311382	0.699515	0.560852	0.42386	0.219122	0.479121	0.593381	0.45975	0.242379	0.458524	0.606185	0.502575	-0.0285874	0.242128	-0.353418	-0.209746	0.108606	pink|0.6995
SDHA|NP_004159.2	M8	pink	0.566007	-0.0614477	-0.495209	-0.00429307	-0.543118	-0.171133	0.0256984	-0.47956	-0.267457	0.224236	0.307798	0.0356656	0.690679	0.707366	0.17505	0.558511	0.335295	0.369365	0.286351	0.280669	0.528022	0.730198	0.439502	-0.30217	0.238368	-0.0304277	-0.146961	-0.431976	pink|0.6907
DCTN2|NP_006391.1	M8	pink	0.326014	0.373588	-0.566554	0.220675	-0.226454	-0.234392	-0.0297906	-0.392188	0.0764683	0.0406711	0.562243	0.00756354	0.685336	0.507958	0.4664	0.414826	0.391356	0.403294	0.212381	-0.0667796	0.378228	0.412372	0.340868	-0.286356	-0.0967741	-0.625533	-0.355695	-0.200844	pink|0.6853
DYNC1LI1|NP_057225.2	M8	pink	0.144398	0.0395296	-0.602635	-0.199708	-0.564737	-0.48529	-0.0992779	-0.506091	-0.105331	0.0384552	0.311117	0.320612	0.683441	0.560047	0.496077	0.291831	0.420772	0.595164	0.484539	0.240744	0.590469	0.617255	0.625207	0.0429232	0.190001	-0.361971	-0.0515197	-0.0533718	pink|0.6834
RAB7A|NP_004628.4	M8	pink	0.337963	-0.210355	-0.686634	-0.0634353	-0.431409	-0.0437131	-0.123791	-0.544525	-0.20466	-0.00791643	0.452147	0.0664279	0.68131	0.502264	0.405588	0.598429	0.384257	0.575927	0.17618	0.23868	0.445633	0.665743	0.556418	-0.236112	-0.167308	-0.444029	-0.146311	-0.159134	pink|0.6813
FBXO41|NP_001073879.2	M8	pink	0.0665087	-0.383672	-0.747354	-0.400977	-0.655492	-0.0110607	-0.0142796	-0.643237	-0.229087	0.0954631	0.137563	0.400468	0.672043	0.471162	0.598602	0.50824	0.598922	0.702703	0.452899	0.427552	0.603833	0.718629	0.666277	-0.0186442	-0.0877971	-0.197526	0.146815	0.129552	pink|0.672
UFL1|NP_056138.1	M8	pink	0.00302026	-0.0278868	-0.237271	-0.194218	-0.347563	-0.470186	-0.435878	-0.523492	-0.422043	-0.141873	0.125408	-0.00304247	0.666834	0.400085	0.459839	0.0343397	-0.0217909	0.14095	0.0565915	-0.092	-0.0879406	0.384892	0.444865	-0.0294203	0.158036	-0.297808	-0.221121	-0.238907	pink|0.6668
NDUFA6|NP_002481.2	M8	pink	0.192301	0.0312603	-0.33865	0.119941	-0.398775	-0.52569	-0.244148	-0.713022	-0.394074	-0.0290088	0.521444	-0.132969	0.660337	0.550327	0.326501	0.230797	0.145086	0.330044	0.350356	0.0761435	0.271968	0.636976	0.402551	-0.260005	0.247617	-0.346753	-0.0793894	-0.148139	pink|0.6603
FH|NP_000134.2	M8	pink	0.375407	0.407621	-0.562841	-0.0501009	-0.308717	-0.154437	0.0490295	-0.331257	-0.157097	-0.086992	0.114502	0.194894	0.656281	0.401949	0.395639	0.438753	0.288253	0.154931	-0.0560356	0.020808	0.320881	0.375804	0.342138	-0.562477	-0.230687	-0.214018	-0.340352	-0.374098	pink|0.6563
NDRG1|NP_006087.2	M8	pink	0.593412	0.256661	-0.252908	0.11044	-0.182899	-0.14054	-0.404896	-0.463373	-0.185722	-0.0453126	0.273305	0.0783929	0.643468	0.509864	0.0452966	0.116499	0.103521	0.231053	0.100436	-0.0198254	0.255933	0.470244	0.266512	-0.318591	0.317502	-0.231721	-0.448694	-0.235905	pink|0.6435
CDC42|NP_426359.1	M8	pink	-0.24696	-0.259005	-0.37257	-0.319229	-0.446727	-0.457485	-0.347192	-0.531065	-0.453388	-0.26856	0.177781	0.0545795	0.606232	0.291515	0.601974	0.188543	0.0667681	0.252706	0.0348376	0.173821	0.0630119	0.40382	0.553698	0.0460713	-0.0283934	-0.402726	-0.0226452	-0.182778	pink|0.6062
PTPRA|NP_002827.1	M8	pink	0.207002	0.112036	-0.404842	0.146334	-0.185948	-0.0864581	-0.394858	-0.664085	-0.269476	-0.265895	0.462272	0.0619062	0.594511	0.270748	0.188623	0.154908	0.112207	0.486875	0.237619	-0.0160996	0.338077	0.518574	0.341463	-0.260161	-0.03437	-0.504298	-0.257104	0.142188	pink|0.5945
TXNRD2|NP_006431.2	M8	pink	0.235269	0.362874	-0.137495	-0.135921	-0.348529	-0.446457	-0.102244	-0.290306	-0.245556	0.0660246	-0.0464435	0.109217	0.593604	0.486395	0.352983	0.0847067	0.111746	-0.120977	0.0151583	-0.0262992	0.0582263	0.253283	0.266378	-0.215182	0.292711	-0.0257399	-0.279211	-0.45482	pink|0.5936
RHOB|NP_004031.1	M8	pink	0.146075	0.148575	-0.538912	-0.220799	-0.401779	-0.291231	0.040765	-0.417495	-0.368959	-0.29174	-0.0734983	0.195601	0.59174	0.197196	0.561281	0.326648	0.168199	0.00637677	-0.2341	0.139741	0.0783348	0.360122	0.493107	-0.498846	-0.391206	-0.126227	-0.0951462	-0.337903	pink|0.5917
HNRNPD|NP_001003810.1	M8	pink	0.0907999	0.290444	-0.141492	-0.132647	-0.122709	-0.356064	-0.569529	-0.403792	-0.122158	-0.0819952	0.103771	0.195841	0.591463	0.352609	0.325944	-0.221032	0.0365939	0.235287	0.21577	-0.346262	-0.0254827	0.204131	0.280865	0.114071	0.312626	-0.399039	-0.443504	0.089655	pink|0.5915
CAP1|NP_006358.1	M8	pink	-0.105964	0.176111	-0.329072	-0.185642	-0.420791	-0.604103	0.07444	-0.121767	0.0669234	0.363537	0.18312	0.0339699	0.583984	0.652827	0.63475	0.300444	0.345833	0.224924	0.34878	-0.155925	0.234773	0.217809	0.319249	0.201917	0.285124	-0.299919	-0.12413	-0.38608	pink|0.584
BCS1L|NP_004319.1	M8	pink	0.497951	-0.00922684	-0.602042	-0.23307	-0.624318	0.0506254	0.166836	-0.394255	-0.26358	-0.000171879	0.0994642	0.394502	0.580186	0.429883	0.263326	0.62221	0.467444	0.334985	0.0867458	0.63126	0.676473	0.647069	0.57701	-0.346716	-0.108653	-0.0493232	-0.0714233	-0.286748	pink|0.5802
PIP5K1C|NP_036530.1	M8	pink	0.270401	0.150626	-0.615534	-0.438512	-0.518272	0.0985724	-0.0553711	-0.405039	-0.213065	0.160307	0.0824239	0.505351	0.565658	0.408564	0.491658	0.424075	0.561653	0.412671	0.333466	0.350346	0.371957	0.500427	0.555348	-0.31674	-0.251835	-0.234821	-0.289093	0.101741	pink|0.5657
DCLK2|NP_001035350.2	M8	pink	-0.120864	-0.0750106	-0.381228	-0.402532	-0.573083	-0.505391	-0.00438905	-0.25498	-0.152921	0.212101	0.00814808	0.274705	0.55987	0.577705	0.481898	0.335784	0.337465	0.373103	0.424036	0.0393569	0.516943	0.380214	0.408749	0.243139	0.355554	-0.0878099	0.0305455	-0.166321	pink|0.5599
IGSF21|NP_116269.3	M8	pink	0.166462	0.199447	-0.466679	0.10915	-0.133553	0.0796916	0.0179817	-0.466471	-0.0973877	0.0383638	0.31919	-0.0679922	0.550053	0.316091	0.537748	0.407853	0.373587	0.165938	0.00794173	-0.045529	0.0585073	0.29259	0.18862	-0.54684	-0.368511	-0.396694	-0.20599	-0.114731	pink|0.5501
COX2|YP_003024029.1	M8	pink	0.116232	0.0402368	-0.59411	-0.218144	-0.429164	-0.124074	-0.0189899	-0.277905	0.0117947	0.29308	0.537821	0.108469	0.543681	0.577626	0.593879	0.57448	0.548888	0.493224	0.323454	0.338534	0.32796	0.427588	0.526504	-0.123055	-0.184401	-0.629835	-0.273551	-0.213581	pink|0.5437
SNCA|NP_009292.1	M8	pink	0.0726649	0.14987	-0.213374	-0.0440923	-0.167803	-0.608807	-0.607282	-0.548265	-0.457519	-0.316776	0.339105	-0.0695954	0.53319	0.333229	0.191951	-0.0665159	-0.197659	0.202653	0.101182	-0.168492	-0.0298031	0.38805	0.348404	-0.281044	0.162186	-0.392141	-0.325294	-0.133428	pink|0.5332
CACNA2D3|NP_060868.2	M8	pink	0.493774	0.01351	-0.180535	-0.0815115	-0.175552	0.128146	-0.234481	-0.379263	-0.338263	-0.13346	-0.0451406	0.118195	0.503637	0.241412	0.109961	0.172224	0.097192	-0.0878051	-0.214208	0.0368787	0.00975303	0.29204	0.17893	-0.276071	0.071144	0.00622259	-0.396769	-0.137262	pink|0.5036
FGA|NP_000499.1	M8	pink	0.241087	0.17363	-0.402818	0.000848122	-0.225965	-0.200635	-0.204171	-0.377429	-0.135334	-0.00443245	0.384846	0.0925476	0.487282	0.464115	0.156905	0.331742	0.231386	0.384413	0.260953	0.0612667	0.481941	0.410934	0.231706	-0.334659	0.125456	-0.315912	-0.265122	-0.119048	pink|0.4873
GNAS|NP_536350.2	M8	pink	0.374911	0.261041	-0.345088	0.230607	0.0480079	-0.0350846	-0.101937	-0.239806	-0.0901631	-0.161129	0.266771	-0.232391	0.453411	0.211039	0.318694	0.285051	0.0445531	-0.0818422	-0.388174	-0.149709	-0.21573	0.165403	0.152139	-0.634581	-0.393196	-0.357153	-0.360495	-0.449589	pink|0.4534
GAD2|NP_001127838.1	M8	pink	0.481679	-0.0734485	-0.189384	0.0973359	-0.0114336	0.0629285	-0.421659	-0.36058	-0.0393402	0.0942779	0.305993	-0.0225101	0.403513	0.447458	-0.0772926	0.0989223	0.138465	0.317284	0.188865	-0.0290798	0.20676	0.363879	0.0778899	-0.181086	0.373036	-0.150297	-0.333808	-0.0434586	pink|0.4035
SIRPG|NP_061026.2	M8	pink	0.14899	0.0314465	-0.141957	0.178613	0.100848	0.172722	-0.512843	-0.416977	-0.168962	-0.484596	0.136394	0.0288568	0.342256	-0.0788658	0.0649427	-0.182276	-0.120965	0.120495	-0.20753	0.0721883	-0.0526631	0.19324	0.153931	-0.270999	-0.103175	-0.306666	-0.221773	0.013921	pink|0.3423
CTNND1|NP_001193815.1	M8	pink	0.113259	-0.0183796	-0.275556	-0.150848	-0.061766	0.0806786	-0.462417	-0.50494	-0.0175806	-0.00221035	0.180741	0.289765	0.330482	0.194941	0.253669	-0.146468	0.298015	0.469564	0.376413	0.0490991	0.102599	0.31412	0.263689	-0.0621833	0.0775214	-0.315962	-0.146818	0.495974	pink|0.3305
SLC4A8|NP_001035049.1	M25	orange	-0.387394	-0.625129	0.0258445	-0.227625	-0.234797	-0.0408522	0.394045	0.125518	-0.201772	-0.20505	-0.489841	0.0978914	-0.370465	-0.361294	-0.0924422	0.0904875	-0.119678	-0.0670429	-0.132873	0.362993	0.22491	0.0329081	0.0584883	0.172203	-0.116467	0.601871	0.862711	0.0478728	orange|0.8627
MPDU1|NP_004861.2	M25	orange	-0.124492	-0.697026	-0.0604885	-0.0589324	-0.337036	-0.0617829	0.386652	-0.0982522	-0.184066	0.00417265	-0.0272345	-0.0245279	-0.269851	-0.0796412	-0.148595	0.284097	0.0834134	0.200002	0.152626	0.585605	0.445965	0.339087	0.16431	0.135001	0.0517714	0.390083	0.854186	0.100701	orange|0.8542
SLC4A4|NP_001091954.1	M25	orange	-0.202121	-0.57055	-0.137616	-0.132117	-0.360184	-0.181852	0.565738	0.182616	0.0204015	0.201795	-0.0254895	-0.0228426	-0.295907	0.0112609	0.018716	0.421988	0.193741	0.171793	0.172351	0.482508	0.429746	0.190709	0.169629	0.223144	-0.0349389	0.303131	0.786984	-0.062105	orange|0.787
NDUFB3|NP_002482.1	M25	orange	-0.372094	-0.493791	-0.427804	-0.466549	-0.58392	-0.2868	0.384893	-0.148119	-0.186461	-0.0721238	-0.355493	0.355639	0.0718679	0.0257758	0.381382	0.276932	0.252666	0.277833	0.176804	0.557479	0.499142	0.347642	0.461997	0.0732493	-0.128789	0.364863	0.766047	-0.0641174	orange|0.766
SLC1A2|NP_004162.2	M25	orange	-0.151477	-0.562407	0.0642531	-0.211798	-0.246279	0.0984512	0.236818	-0.0689569	-0.142685	-0.124151	-0.322879	0.266107	-0.337158	-0.313377	-0.159735	-0.0526762	0.050736	0.104528	0.0927384	0.53769	0.285942	0.168212	0.159077	0.274389	0.0307219	0.445625	0.748041	0.393446	orange|0.748
SACM1L|NP_054735.3	M25	orange	-0.0352253	-0.37579	0.05412	0.16757	-0.024999	0.246367	0.431504	0.148154	-0.0174596	-0.201947	-0.226293	-0.0253212	-0.412637	-0.385496	-0.31685	0.181183	-0.0884797	-0.0379781	-0.228792	0.333831	0.319942	0.0379263	-0.0782631	-0.0785509	-0.230845	0.414936	0.731808	0.0459851	orange|0.7318
RPH3A|NP_055769.2	M25	orange	-0.44617	-0.657406	-0.14813	-0.302963	-0.533073	-0.365391	0.0366878	-0.31886	-0.386452	-0.0577854	-0.133087	0.0439184	0.123881	0.107773	0.221914	0.125384	-0.0205282	0.316823	0.277888	0.360348	0.312991	0.426362	0.414052	0.294376	0.15682	0.218136	0.723755	-0.0401603	orange|0.7238
BSG|NP_940991.1	M25	orange	-0.30476	-0.364115	0.0616731	-0.0511695	-0.217588	-0.271955	0.258703	0.101528	-0.0065022	0.0139162	-0.136663	-0.0503912	-0.289126	-0.130843	-0.0301685	-0.0805291	-0.110761	0.0741211	0.105987	0.376005	0.08919	0.111943	0.195767	0.218061	0.0277899	0.275661	0.718888	-0.112275	orange|0.7189
SLC4A7|NP_003606.3	M25	orange	-0.252508	-0.718618	0.0265475	-0.372727	-0.411179	-0.0689261	0.125972	-0.172029	-0.370851	-0.156208	-0.50932	0.275907	-0.101847	-0.152419	-0.139107	-0.0238077	-0.0792437	0.124571	0.144734	0.366163	0.356597	0.269125	0.195428	0.394229	0.266816	0.648613	0.697979	0.203881	orange|0.698
PLS3|NP_001129497.1	M25	orange	-0.872146	-0.442612	0.159008	-0.344748	-0.215447	-0.470638	-0.263331	-0.139798	-0.353233	-0.329333	-0.151199	0.067606	-0.299229	-0.328538	0.0303025	-0.409013	-0.392765	0.235629	0.266166	0.240557	-0.0224761	0.0684271	0.291736	0.389696	0.0187968	0.0422503	0.685942	0.285139	orange|0.6859
THNSL1|NP_079114.3	M25	orange	-0.526886	-0.457236	-0.014789	-0.455409	-0.441486	-0.475837	-0.0158955	-0.260515	-0.44542	-0.287081	-0.247136	0.26014	-0.100432	-0.166311	0.16498	-0.106985	-0.0841937	0.1303	0.175	0.446133	0.212246	0.234431	0.384981	0.254243	0.0709315	0.210185	0.680879	0.252733	orange|0.6809
ETFDH|NP_004444.2	M25	orange	-0.301584	-0.374491	-0.307466	-0.142738	-0.496925	-0.118947	0.372865	-0.216017	-0.153785	0.023853	0.136941	0.137667	-0.00270002	0.0540446	0.207589	0.406997	0.288025	0.399806	0.337991	0.626203	0.620113	0.401056	0.363072	0.0448214	-0.14884	0.0108385	0.674487	0.0707964	orange|0.6745
ITPR1|NP_001161744.1	M25	orange	-0.137158	-0.698391	0.172	-0.425653	-0.268456	0.00767527	0.0433705	-0.0253224	-0.340007	-0.152447	-0.475859	0.324159	-0.44356	-0.302768	-0.44801	-0.187714	-0.170673	0.0792492	0.148013	0.552338	0.257178	0.192703	0.140355	0.307045	0.254418	0.718603	0.660938	0.374666	orange|0.6609
EIF4A1|NP_001407.1	M25	orange	-0.355681	-0.665013	0.37755	-0.0792661	-0.116576	-0.142583	-0.0712197	0.0492517	-0.320279	-0.0159203	-0.0358713	-0.244276	-0.444424	-0.133589	-0.423265	-0.0643397	-0.362927	0.0271318	0.110861	0.327283	0.0827396	0.100946	-0.0358053	0.27399	0.31076	0.351674	0.650804	0.0153503	orange|0.6508
STAG2|NP_001036214.1	M25	orange	-0.250836	-0.197252	0.0210475	-0.0639272	-0.284803	-0.171726	0.373464	0.0439737	-0.243521	-0.159074	-0.0831254	0.00777891	-0.326344	-0.263255	-0.12494	0.0738871	-0.138675	-0.0478184	-0.00103099	0.586243	0.172255	0.149922	0.209821	-0.0897472	-0.237254	0.277692	0.60034	-0.114109	orange|0.6003
NDUFB10|NP_004539.1	M25	orange	-0.602699	-0.384708	0.0460905	-0.269282	-0.0985931	-0.0103236	-0.0409617	0.0437757	-0.141358	-0.370688	-0.507695	0.24967	-0.225589	-0.426456	-0.0246142	-0.238408	-0.254794	0.132504	-0.0226836	0.0455355	0.156042	-0.0676344	0.091769	0.32629	-0.101605	0.289368	0.599231	0.25384	orange|0.5992
TPBG|NP_006661.1	M25	orange	-0.485073	-0.40397	0.0780301	-0.340549	-0.299363	-0.17986	0.0192424	-0.253347	-0.434122	-0.366779	-0.422031	0.246903	-0.160897	-0.387223	0.0446604	-0.309457	-0.202378	-0.0186168	0.0618798	0.375434	-0.0142143	0.137139	0.26059	0.219821	-0.0565458	0.380671	0.594994	0.307827	orange|0.595
EEF1A2|NP_001949.1	M25	orange	-0.284891	-0.138805	0.215675	0.211946	0.115116	-0.0394951	0.564589	0.4793	0.154693	-0.10175	-0.179363	-0.197366	-0.589838	-0.420336	-0.296195	0.0408058	-0.223381	-0.275695	-0.233937	0.16903	0.0796751	-0.281823	-0.260429	0.0474552	-0.18576	0.377372	0.591502	-0.17002	orange|0.5915
RPN2|NP_002942.2	M25	orange	-0.341574	-0.226059	-0.288375	-0.181874	-0.269039	0.0380989	0.23832	-0.0699773	0.03003	0.00898599	0.0731338	0.230016	-0.183213	-0.0998066	0.112453	0.202661	0.229516	0.464267	0.336365	0.500333	0.477678	0.229979	0.286757	-0.020579	-0.306526	-0.0481886	0.564749	0.241217	orange|0.5647
RPL15|NP_002939.2	M25	orange	-0.30534	-0.390635	0.258679	-0.045985	-0.0345049	0.137447	-0.105055	-0.0597117	-0.139732	-0.0948657	-0.0601924	0.03236	-0.370902	-0.242592	-0.287412	-0.16888	-0.136228	0.14085	0.159541	0.386552	0.192759	0.0668075	-0.021019	0.148233	0.135873	0.180499	0.558144	0.306191	orange|0.5581
ANXA2|NP_001129487.1	M25	orange	-0.453547	-0.497997	-0.0392166	-0.353977	-0.178185	0.0629553	-0.0558738	-0.136362	-0.248706	-0.44884	-0.53381	0.319208	-0.128539	-0.489524	0.11952	-0.2779	-0.176329	0.0796897	-0.127305	0.216817	-0.0571116	0.0399781	0.28373	0.320255	-0.25749	0.263942	0.548307	0.344527	orange|0.5483
EIF4A1|NP_001191439.1	M25	orange	-0.0661387	-0.591125	0.12934	-0.162638	-0.236017	-0.0439456	-0.14095	-0.123714	-0.395656	-0.136689	-0.105636	-0.0713145	-0.204503	-0.0656225	-0.28678	0.00731279	-0.261029	0.0669962	-0.053926	0.538644	0.0928507	0.298968	0.225531	-0.0343935	0.116638	0.325786	0.537414	-0.148984	orange|0.5374
CACNA2D1|NP_000713.2	M25	orange	-0.469408	-0.218312	-0.029249	0.062927	-0.0902015	-0.288828	0.201499	-0.00580102	-0.184384	-0.313403	0.0461999	-0.123909	-0.196442	-0.258981	-0.0429394	0.0920333	-0.216054	0.0696568	0.0095407	0.056492	0.228672	0.0184235	0.0121607	0.0736389	-0.169437	0.034092	0.468082	0.0497322	orange|0.4681
HLA-B|NP_005505.2	M25	orange	-0.0269299	-0.533475	-0.168549	-0.229119	-0.164985	0.270846	-0.0225375	-0.0883281	-0.105351	-0.0775071	-0.1367	0.222339	-0.152484	-0.0586526	-0.176039	0.192052	0.106047	0.33254	0.0849056	0.473676	0.45597	0.25392	0.135868	-0.0632216	-0.0149344	0.257626	0.453104	0.166152	orange|0.4531
NDUFB4|NP_004538.2	M25	orange	-0.273439	-0.133004	-0.123729	0.0427879	-0.122906	-0.124513	-0.0463728	-0.266441	-0.2526	-0.396222	0.0537686	-0.0518241	-0.0503409	-0.285974	0.13323	-0.103999	-0.19455	0.114107	-0.106111	0.325855	-0.089064	0.207068	0.335067	-0.23182	-0.444953	-0.12902	0.431851	0.000268391	orange|0.4319
CCDC142|NP_116168.3	M25	orange	-0.0227025	-0.445362	-0.101883	-0.0574327	-0.0744882	0.25365	-0.0137907	-0.180264	-0.284842	-0.40817	-0.263772	0.0455512	0.000988224	-0.248017	0.00626372	0.159192	-0.0742506	-0.0599745	-0.412571	0.294654	0.108082	0.13542	0.0869085	-0.242157	-0.256256	0.222315	0.402614	-0.0375371	orange|0.4026
NFASC|NP_001005388.2	M25	orange	-0.256133	-0.527916	-0.118841	-0.292673	-0.259947	0.0548775	0.0457466	-0.167179	-0.134121	-0.106618	-0.340951	0.235055	0.104887	-0.110599	0.185241	-0.0540769	0.077673	0.150812	0.104934	0.150167	0.100219	0.136792	0.195163	0.458052	0.0729154	0.258662	0.319866	0.222567	orange|0.3199
COX5B|NP_001853.2	M15	midnightblue	-0.238686	-0.361937	-0.678391	-0.572766	-0.567799	-0.255236	-0.207136	-0.444806	-0.00692613	0.230369	0.224449	0.485522	0.4535	0.464498	0.58476	0.265855	0.554908	0.958381	0.779931	0.264328	0.57641	0.570727	0.697053	0.347298	0.0405561	-0.403509	0.163076	0.405338	midnightblue|0.9584
ESYT2|NP_065779.1	M15	midnightblue	-0.0539998	-0.312592	-0.715726	-0.503679	-0.687529	-0.185284	-0.0724899	-0.476251	-0.12644	0.255413	0.299527	0.453735	0.57508	0.582147	0.496925	0.522737	0.598135	0.911192	0.74007	0.351023	0.779717	0.68338	0.682477	0.247015	0.077345	-0.356411	0.0522284	0.22948	midnightblue|0.9112
RHOT1|NP_001028740.1	M15	midnightblue	-0.0527733	-0.388091	-0.658246	-0.624208	-0.825058	-0.282303	-0.0643092	-0.553887	-0.236861	0.343678	0.225556	0.506258	0.533666	0.64526	0.4907	0.461497	0.623747	0.88154	0.842365	0.578149	0.779456	0.789061	0.772281	0.201396	0.20418	-0.185106	0.215796	0.209523	midnightblue|0.8815
MAP6|NP_149052.1	M15	midnightblue	-0.0111403	-0.28296	-0.639158	-0.340952	-0.644358	-0.268766	-0.227349	-0.601832	-0.167212	0.24584	0.508284	0.250076	0.695834	0.672446	0.557105	0.477306	0.529259	0.880638	0.695402	0.28898	0.61794	0.727076	0.705898	0.2402	0.142933	-0.569457	-0.0321919	0.122102	midnightblue|0.8806
PHB|NP_002625.1	M15	midnightblue	-0.0824109	-0.28704	-0.477852	-0.386007	-0.52468	-0.094749	-0.227569	-0.546837	-0.189603	0.316541	0.355487	0.31613	0.438852	0.532405	0.317828	0.378023	0.480345	0.874118	0.818148	0.167514	0.64727	0.627358	0.493483	0.188382	0.169299	-0.344566	0.0825893	0.447745	midnightblue|0.8741
ACSL6|NP_001192179.1	M15	midnightblue	-0.185228	-0.381267	-0.59462	-0.560977	-0.812194	-0.442297	-0.164897	-0.618744	-0.342306	0.207595	0.289069	0.408785	0.581325	0.581566	0.520822	0.377175	0.467385	0.86566	0.826845	0.397951	0.676429	0.771927	0.791336	0.33371	0.20379	-0.314457	0.193952	0.260094	midnightblue|0.8657
STOML2|NP_038470.1	M15	midnightblue	-0.0905663	-0.230458	-0.537908	-0.376225	-0.475236	-0.227498	-0.220687	-0.39405	-0.00697969	0.117503	0.232924	0.433739	0.379486	0.399214	0.361786	0.238925	0.428911	0.858701	0.64076	0.254521	0.66739	0.542432	0.590687	0.226751	0.109426	-0.364147	0.198181	0.333344	midnightblue|0.8587
UQCRC2|NP_003357.2	M15	midnightblue	-0.249606	-0.200927	-0.642528	-0.642217	-0.549132	-0.224885	-0.148805	-0.32707	0.00917585	0.0541995	-0.0752618	0.703396	0.382695	0.275489	0.510709	0.154359	0.473987	0.853036	0.632835	0.21551	0.64938	0.45193	0.676756	0.336741	-0.0268143	-0.246137	0.203531	0.447127	midnightblue|0.853
UQCRC1|NP_003356.2	M15	midnightblue	-0.0664726	-0.391732	-0.601471	-0.640863	-0.772503	-0.273118	-0.156883	-0.514731	-0.291667	0.115405	-0.0309599	0.603858	0.488027	0.464879	0.367092	0.30816	0.424498	0.839981	0.679418	0.443318	0.772973	0.740479	0.771078	0.224918	0.179421	-0.0441687	0.305986	0.249941	midnightblue|0.84
NUCB1|NP_006175.2	M15	midnightblue	-0.241062	-0.455301	-0.454389	-0.515394	-0.506731	-0.0653557	-0.0408888	-0.347416	-0.125239	0.225656	0.171951	0.438059	0.147765	0.288977	0.217977	0.355183	0.461944	0.834868	0.755188	0.331725	0.721394	0.496917	0.451642	0.311791	0.0710282	-0.151924	0.321786	0.573011	midnightblue|0.8349
HECW2|NP_065811.1	M15	midnightblue	-0.0948317	-0.197034	-0.567629	-0.390409	-0.298125	-0.0691207	-0.246446	-0.295765	0.102503	0.0763562	0.0586339	0.480221	0.328943	0.280783	0.305583	0.0993602	0.373822	0.806669	0.577037	0.0697819	0.524535	0.393777	0.448299	0.189269	0.0330867	-0.228914	0.0536072	0.383457	midnightblue|0.8067
SDHC|NP_001030589.1	M15	midnightblue	0.080024	-0.342032	-0.679968	-0.500878	-0.641872	-0.234745	-0.0972474	-0.422452	-0.0221901	0.434334	0.240697	0.364297	0.635357	0.742998	0.568415	0.481896	0.640867	0.804946	0.687367	0.266013	0.597299	0.649463	0.641012	0.239149	0.231738	-0.267217	0.00263922	0.0483344	midnightblue|0.8049
NDUFB5|NP_002483.1	M15	midnightblue	0.00439678	-0.396936	-0.68705	-0.488111	-0.690753	-0.0888907	-0.0747148	-0.493553	-0.112359	0.228985	0.192332	0.425641	0.575604	0.549703	0.559396	0.443306	0.597156	0.784651	0.563689	0.5899	0.63101	0.698074	0.740044	0.1297	0.0425964	-0.254955	0.167735	0.0259056	midnightblue|0.7847
AFG3L2|NP_006787.2	M15	midnightblue	0.0339056	-0.361602	-0.407285	-0.290771	-0.556442	-0.189912	-0.26248	-0.600717	-0.280501	0.271393	0.529374	0.163484	0.411773	0.530456	0.269889	0.339288	0.39764	0.784285	0.737889	0.397534	0.487695	0.718827	0.59833	0.166244	0.182034	-0.410448	0.086576	0.312415	midnightblue|0.7843
SEL1L|NP_005056.3	M15	midnightblue	-0.206763	-0.429687	-0.581375	-0.523778	-0.671649	-0.310898	0.0835903	-0.334498	-0.156078	0.128242	0.0795065	0.468283	0.285408	0.310551	0.336494	0.339659	0.408221	0.783181	0.68697	0.401055	0.706897	0.587809	0.648165	0.364904	0.0473172	-0.0749121	0.357284	0.310033	midnightblue|0.7832
KDELR1|NP_006792.1	M15	midnightblue	0.113468	-0.156292	-0.651643	-0.308956	-0.286537	0.194385	0.0401091	-0.206729	0.215246	0.291664	0.109787	0.44595	0.315077	0.368075	0.321694	0.467233	0.621336	0.778129	0.514353	0.0422774	0.674781	0.380212	0.324944	0.0131528	-0.122949	-0.212198	0.0533515	0.377414	midnightblue|0.7781
ADPGK|NP_112574.3	M15	midnightblue	-0.166546	-0.0854796	-0.508526	-0.40384	-0.466164	-0.264536	-0.48227	-0.628223	-0.206795	0.068744	0.283032	0.347209	0.606782	0.47063	0.55983	0.122906	0.350055	0.774639	0.602901	0.10248	0.369456	0.561987	0.641302	0.0759808	0.0515028	-0.542911	-0.0350607	0.286119	midnightblue|0.7746
GLG1|NP_001139138.1	M15	midnightblue	-0.291797	-0.163742	-0.418236	-0.273704	-0.210404	0.0813703	-0.232483	-0.313866	-0.0319732	-0.041897	0.206813	0.327759	0.0889786	0.00858323	0.214816	0.104371	0.222499	0.770101	0.497101	0.121061	0.388365	0.32974	0.41777	0.0639589	-0.324282	-0.411972	0.20119	0.558358	midnightblue|0.7701
PMPCB|NP_004270.2	M15	midnightblue	-0.0325476	-0.372285	-0.580356	-0.707379	-0.711834	-0.161293	-0.238017	-0.611568	-0.379629	0.013955	-0.14659	0.687042	0.482074	0.359608	0.37827	0.225964	0.421674	0.753685	0.582024	0.424034	0.658005	0.704014	0.740935	0.09632	0.0901923	0.00766971	0.261257	0.400896	midnightblue|0.7537
SCARB2|NP_005497.1	M15	midnightblue	-0.225417	-0.30576	-0.3973	-0.166569	-0.239333	0.0279787	-0.036473	-0.333651	0.0246893	0.194193	0.451445	0.146728	0.0762961	0.196785	0.233708	0.347347	0.417567	0.753269	0.61783	0.179612	0.50962	0.361638	0.289146	0.120922	-0.143418	-0.429084	0.25471	0.54819	midnightblue|0.7533
TUFM|NP_003312.3	M15	midnightblue	0.0954821	-0.451369	-0.439881	-0.38495	-0.618194	-0.0880998	-0.171475	-0.537568	-0.255543	0.0666605	0.203482	0.423368	0.337559	0.342629	0.180567	0.262008	0.384941	0.7533	0.573726	0.624462	0.660824	0.726077	0.67519	0.199237	0.163768	-0.15013	0.299056	0.316547	midnightblue|0.7533
TIMM50|NP_001001563.1	M15	midnightblue	-0.103442	-0.348078	-0.342867	-0.205161	-0.386003	-0.238012	-0.238447	-0.508835	-0.188824	0.255479	0.542288	0.0792911	0.347204	0.484096	0.192399	0.299062	0.337606	0.751597	0.783239	0.089477	0.507599	0.541705	0.339629	0.298726	0.298894	-0.38414	0.00584455	0.426848	midnightblue|0.7516
OPA1|NP_056375.2	M15	midnightblue	-0.184083	-0.341544	-0.361697	-0.362265	-0.241759	0.0545772	-0.33344	-0.385778	0.0323127	0.0861833	0.278899	0.372831	0.216136	0.165884	0.338956	0.0688888	0.4175	0.749401	0.572071	0.178848	0.337303	0.331304	0.417795	0.405881	0.00846404	-0.484297	0.0531613	0.687619	midnightblue|0.7494
NUBPL|NP_001188502.1	M15	midnightblue	-0.275221	-0.613823	-0.551428	-0.638274	-0.610199	0.0390777	-0.0665178	-0.342897	-0.140461	0.0947911	-0.0952592	0.519323	0.258322	0.232847	0.415153	0.286444	0.445924	0.73535	0.489118	0.636989	0.585501	0.531106	0.647117	0.246306	-0.0533331	-0.023534	0.443059	0.227068	midnightblue|0.7354
SYNJ2BP-COX16|NP_001189476.1	M15	midnightblue	0.137542	-0.219581	-0.570977	-0.539535	-0.669569	-0.3367	-0.212873	-0.392675	-0.122222	0.327545	0.211469	0.427408	0.623563	0.719439	0.417846	0.35511	0.488874	0.728027	0.64934	0.340682	0.594075	0.648132	0.684468	0.262981	0.349651	-0.243864	-0.124076	-0.0329713	midnightblue|0.728
C2CD2L|NP_055622.3	M15	midnightblue	-0.0515518	-0.277381	-0.723103	-0.325525	-0.458789	-0.0137014	0.0105308	-0.52275	-0.167505	0.0383543	0.338433	0.306452	0.403826	0.294353	0.522993	0.560687	0.559106	0.717195	0.428928	0.317651	0.555296	0.56113	0.542831	-0.163128	-0.362891	-0.411379	0.157143	0.361865	midnightblue|0.7172
TSFM|NP_005717.3	M15	midnightblue	-0.448389	-0.393959	-0.374844	-0.299997	-0.539004	-0.359594	-0.109334	-0.438416	-0.225308	-0.0128404	0.387461	0.186064	0.260346	0.206859	0.429938	0.257661	0.26735	0.714161	0.585436	0.35306	0.500866	0.492903	0.596226	0.40685	-0.0287234	-0.487747	0.384648	0.349993	midnightblue|0.7142
ME1|NP_002386.1	M15	midnightblue	-0.141879	-0.275802	-0.466213	-0.510926	-0.615729	-0.398778	-0.157591	-0.389556	-0.0661352	0.401826	0.317107	0.316831	0.511477	0.657174	0.533649	0.290989	0.528639	0.707895	0.767135	0.334256	0.480748	0.531456	0.593385	0.40726	0.346234	-0.342372	-0.000461864	0.102581	midnightblue|0.7079
NDUFB8|NP_004995.1	M15	midnightblue	0.213125	-0.141393	-0.582101	-0.305061	-0.529649	0.0213224	-0.177661	-0.594309	-0.169253	0.0708229	0.32321	0.42044	0.521829	0.37674	0.402565	0.301463	0.512031	0.695558	0.484185	0.506778	0.482414	0.669259	0.687231	-0.0218634	-0.0951743	-0.406717	-0.0372371	0.275803	midnightblue|0.6956
HNRNPH3|NP_036339.1	M15	midnightblue	-0.0314017	-0.150403	-0.446015	-0.264669	-0.422917	-0.202569	-0.0707826	-0.364648	-0.145039	0.0751074	0.324317	0.308341	0.318031	0.30722	0.173831	0.317452	0.322645	0.689775	0.609042	0.125627	0.608105	0.480179	0.419882	0.234448	0.0661414	-0.305083	-0.0089561	0.391704	midnightblue|0.6898
ARHGEF2|NP_004714.2	M15	midnightblue	0.0481536	-0.119035	-0.712449	-0.370932	-0.266308	0.161554	0.219874	0.0124361	0.305072	0.255224	0.0780452	0.456917	0.205396	0.264632	0.359528	0.536876	0.615338	0.679005	0.377083	0.103554	0.615822	0.241019	0.328944	0.0388912	-0.314311	-0.222365	-8.26e-06	0.251423	midnightblue|0.679
SURF4|NP_149351.1	M15	midnightblue	-0.508347	-0.23417	-0.328661	-0.354462	-0.451378	-0.261283	-0.0883394	-0.227133	-0.13901	0.117646	0.234455	0.214011	0.117507	0.216403	0.290195	0.229363	0.201696	0.678986	0.617975	0.282696	0.521366	0.365862	0.451671	0.209984	-0.0498217	-0.309046	0.357043	0.211361	midnightblue|0.679
UQCRB|NP_006285.1	M15	midnightblue	-0.227586	-0.348704	-0.512568	-0.32978	-0.571576	-0.0691591	0.0623551	-0.46085	-0.0876522	0.228232	0.129636	0.29947	0.405858	0.378548	0.550554	0.377923	0.530603	0.677848	0.563292	0.377228	0.574854	0.544744	0.529819	0.13438	-0.0249164	-0.196417	0.425074	0.199166	midnightblue|0.6778
MTCH1|NP_055156.1	M15	midnightblue	-0.34978	-0.149972	-0.525674	-0.277556	-0.19366	0.0890025	-0.0148284	-0.250014	0.157888	0.0215129	0.255692	0.354502	0.173087	0.0434326	0.50204	0.247753	0.495416	0.674924	0.445606	0.125651	0.413641	0.185182	0.332574	0.188912	-0.352904	-0.525888	0.113434	0.573448	midnightblue|0.6749
LETM1|NP_036450.1	M15	midnightblue	0.0813285	-0.274158	-0.595758	-0.515925	-0.564162	-0.0678212	-0.225132	-0.444414	-0.0800636	0.023782	-0.108119	0.606757	0.528656	0.366612	0.449054	0.139601	0.449484	0.668034	0.409727	0.46281	0.529534	0.580673	0.700283	0.119712	0.0878657	-0.0950486	0.135045	0.119618	midnightblue|0.668
HDLBP|NP_976221.1	M15	midnightblue	-0.0634381	-0.128678	-0.521446	-0.283807	-0.103438	0.134328	-0.469677	-0.504932	-0.0995624	-0.382954	0.0934845	0.463643	0.298048	-0.0833567	0.319887	-0.0237105	0.216193	0.653459	0.18363	0.068304	0.251059	0.329607	0.466336	-0.0900533	-0.381565	-0.470847	-0.0175639	0.624686	midnightblue|0.6535
BCL2L13|NP_056182.2	M15	midnightblue	-0.269588	-0.347422	-0.274621	-0.196987	-0.14976	0.0787825	-0.102657	-0.0325299	0.136362	0.131352	0.282052	0.152671	0.068003	0.125101	0.131755	0.258854	0.248181	0.636729	0.443626	-0.00469511	0.427416	0.14782	0.188325	0.502393	-0.00330384	-0.390603	0.0448025	0.387479	midnightblue|0.6367
PNPLA6|NP_001159583.1	M15	midnightblue	0.238097	-0.375031	-0.557612	-0.240741	-0.263779	0.332047	0.203739	-0.0431866	0.188813	0.304618	0.154642	0.267832	0.0615583	0.239619	0.131931	0.56763	0.531437	0.618861	0.292482	0.35897	0.529316	0.374596	0.32854	-0.0621108	-0.278626	-0.090096	0.195283	0.185085	midnightblue|0.6189
ALCAM|NP_001230210.1	M15	midnightblue	0.0459305	-0.364416	-0.486896	0.0661598	-0.195423	0.237184	0.0342728	-0.293453	0.0278998	-0.0470436	0.412235	0.031335	0.248891	0.133573	0.224081	0.53562	0.350551	0.599165	0.15795	0.205729	0.513706	0.388092	0.292078	0.00789254	-0.301565	-0.438899	0.180566	0.195834	midnightblue|0.5992
UBR4|NP_065816.2	M15	midnightblue	0.10429	0.088405	-0.489385	-0.294436	-0.386258	0.0148066	0.0857058	-0.246574	0.00203626	0.281963	-0.00394245	0.377711	0.313437	0.34599	0.256674	0.251693	0.398514	0.516328	0.493041	0.14382	0.427227	0.410181	0.386022	-0.162739	-0.105796	-0.0117062	0.0163015	0.104725	midnightblue|0.5163
SLC9A1|NP_003038.2	M15	midnightblue	0.13456	0.0149397	-0.417861	-0.0481198	0.0740005	0.334592	-0.183287	-0.126605	0.238679	-0.012899	0.295152	0.227139	0.180306	0.0513931	0.155681	0.215465	0.313451	0.513046	0.157184	-0.0851651	0.242233	0.0904806	0.165992	-0.00740028	-0.32745	-0.523339	-0.309114	0.362808	midnightblue|0.513
APOA1BP|NP_658985.2	M15	midnightblue	-0.304438	-0.172707	-0.42789	-0.160458	0.0885226	0.349697	0.241808	0.189618	0.524344	0.122454	0.0251074	0.278593	-0.190764	-0.186233	0.320412	0.170948	0.437876	0.495024	0.210849	0.0440699	0.23078	-0.122888	0.0860246	0.180652	-0.522301	-0.274597	0.238602	0.468318	midnightblue|0.495
SOGA3|NP_001012279.1	M15	midnightblue	-0.0997319	-0.2128	-0.115981	-0.452733	-0.198171	0.0126514	-0.487173	-0.303483	-0.150048	-0.0059403	-0.0557857	0.447866	0.258571	0.160603	0.0789005	-0.111146	0.152187	0.480249	0.436122	-0.0899712	0.282498	0.203357	0.23171	0.469392	0.331396	-0.162118	-0.185472	0.581755	midnightblue|0.4802
LGALS7B|NP_001035972.1	M15	midnightblue	-0.171109	0.048659	-0.337571	-0.0626494	-0.136014	0.115716	0.132364	-0.081613	0.324629	0.154717	0.0996092	0.27005	0.0998751	0.0380862	0.378658	0.0870139	0.406359	0.474276	0.353774	0.122933	0.277683	0.115482	0.260985	0.130184	-0.261516	-0.310541	0.218123	0.285218	midnightblue|0.4743
PSMD11|NP_002806.2	M15	midnightblue	0.0393231	-0.0631598	-0.129223	-0.289884	-0.302078	0.00391769	-0.325002	-0.503989	-0.223332	0.106223	0.174593	0.319745	0.318456	0.312909	0.0519827	-0.0246458	0.231242	0.43231	0.515029	0.235729	0.366032	0.376367	0.271262	0.1402	0.351615	-0.158687	-0.177585	0.34196	midnightblue|0.4323
DCTN3|NP_077324.1	M15	midnightblue	-0.209718	0.106312	-0.476498	-0.229656	-0.00175295	0.218486	0.119836	-0.0425281	0.239007	-0.162959	-0.147185	0.478219	0.0336391	-0.186506	0.338046	0.158844	0.364119	0.408809	0.0893891	-0.073135	0.38182	-0.0292937	0.137448	-0.110242	-0.518458	-0.213858	0.140456	0.498846	midnightblue|0.4088
PDE2A|NP_001137311.1	M15	midnightblue	-0.131927	-0.0600276	-0.0109186	-0.340985	-0.117357	-0.0617913	-0.592359	-0.468359	-0.24707	0.00645632	0.202609	0.288549	0.168248	0.121555	0.0541477	-0.31721	0.0804309	0.405778	0.553265	0.0634817	0.00155127	0.231924	0.231719	0.237269	0.26515	-0.289394	-0.27366	0.641349	midnightblue|0.4058
ISOC2|NP_078986.1	M15	midnightblue	-0.0295826	0.212057	-0.132548	0.0958369	0.167246	0.00704991	-0.610381	-0.318002	-0.100339	-0.246013	0.28797	-0.0186012	0.290342	0.046674	0.0679781	-0.121772	-0.150703	0.356549	0.085949	-0.462674	-0.0529765	0.103368	0.10211	-0.133215	-0.137715	-0.564112	-0.354656	0.265977	midnightblue|0.3565
RAP2A|NP_066361.1	M9	magenta	0.0209284	0.102178	-0.816864	-0.422041	-0.534302	-0.281163	-0.00445803	-0.38351	0.0867581	0.239262	0.257189	0.400451	0.768359	0.612803	0.942155	0.503208	0.720921	0.59883	0.384909	0.123249	0.398845	0.440368	0.6653	-0.0214333	-0.202541	-0.595515	-0.203711	-0.0465339	magenta|0.9422
SYNGR3|NP_004200.2	M9	magenta	0.0772431	-0.0347415	-0.85952	-0.523316	-0.710113	-0.123648	0.220038	-0.429686	-0.0313351	0.118303	-0.0521888	0.621892	0.734741	0.466899	0.874283	0.548322	0.772388	0.535372	0.303251	0.422615	0.603798	0.541128	0.735427	-0.052511	-0.247659	-0.237094	0.0501763	-0.0257256	magenta|0.8743
RAB27B|NP_004154.2	M9	magenta	0.0825228	0.278418	-0.65658	-0.351262	-0.489642	-0.263009	0.270954	-0.197231	0.131426	0.32892	0.104624	0.351562	0.604014	0.539665	0.861083	0.503989	0.70452	0.285613	0.23915	0.158827	0.309738	0.284355	0.500935	-0.162519	-0.226705	-0.358793	-0.136162	-0.199812	magenta|0.8611
SNAP25|NP_570824.1	M9	magenta	-0.0195524	-0.0462956	-0.788933	-0.400923	-0.547412	-0.10815	0.0651249	-0.480882	-0.0100759	0.282142	0.265897	0.362994	0.693572	0.552247	0.859783	0.560758	0.748621	0.634548	0.479238	0.171126	0.438623	0.498362	0.593724	-0.049624	-0.244579	-0.485975	-0.0892189	0.127655	magenta|0.8598
PLXNA4|NP_065962.1	M9	magenta	-0.0921622	0.133632	-0.615816	-0.156024	-0.126607	-0.0656759	0.0351591	-0.16146	0.216156	-0.0808378	0.122758	0.201693	0.46449	0.131773	0.855407	0.296248	0.466416	0.239854	-0.114667	-0.0489616	-0.00398123	0.0537488	0.385617	-0.142244	-0.559533	-0.595593	-0.124989	-0.0265249	magenta|0.8554
RTN1|NP_996734.1	M9	magenta	0.105389	0.219945	-0.819962	-0.267684	-0.460056	-0.281758	0.193721	-0.230404	0.229428	0.254225	0.228154	0.352382	0.70828	0.604979	0.854444	0.569381	0.728469	0.507553	0.30572	0.0838241	0.507746	0.363505	0.523093	-0.117329	-0.186117	-0.47949	-0.17061	-0.197637	magenta|0.8544
RAP2C|NP_067006.3	M9	magenta	-0.00227658	0.0415613	-0.776444	-0.347714	-0.646762	-0.214232	0.135492	-0.468831	-0.0272645	0.10557	0.131705	0.466721	0.784671	0.500553	0.85282	0.527106	0.682657	0.585564	0.37428	0.207068	0.608652	0.523316	0.665782	0.0540671	-0.166405	-0.428683	-0.00185081	0.00702185	magenta|0.8528
SYNGR1|NP_004702.2	M9	magenta	-0.0884277	-0.103999	-0.783642	-0.651586	-0.668418	-0.128501	0.0460616	-0.410153	0.00897625	0.161541	-0.0721126	0.702274	0.664737	0.446477	0.840073	0.385721	0.744655	0.662418	0.476553	0.34615	0.585166	0.480933	0.718753	0.182771	-0.117962	-0.283686	0.025928	0.191033	magenta|0.8401
SNAP25|NP_003072.2	M9	magenta	-0.119736	-0.163276	-0.778805	-0.400626	-0.563337	-0.139294	0.137044	-0.440765	-0.0301856	0.246898	0.221088	0.31814	0.6232	0.508415	0.834182	0.59975	0.705122	0.621495	0.444863	0.218664	0.49099	0.489142	0.566857	-0.0383975	-0.248386	-0.396144	0.0709112	0.0717742	magenta|0.8342
FXYD6|NP_001158308.1	M9	magenta	0.0272577	-0.0881754	-0.822498	-0.362661	-0.54977	-0.0544157	0.284134	-0.248016	0.125646	0.149281	0.0909247	0.390407	0.518361	0.360305	0.832682	0.556425	0.69228	0.493918	0.167602	0.500901	0.413232	0.43602	0.689156	-0.155866	-0.467322	-0.339667	0.157945	-0.183453	magenta|0.8327
GNAO1|NP_066268.1	M9	magenta	-0.0624854	0.280227	-0.588804	-0.422183	-0.367867	-0.333635	-0.153612	-0.217868	0.126408	0.117055	0.0878102	0.408128	0.634547	0.423485	0.829204	0.150379	0.462406	0.404824	0.241508	-0.0265845	0.103522	0.218004	0.590709	0.0870424	-0.173359	-0.563844	-0.319525	-0.0649345	magenta|0.8292
SYT1|NP_005630.1	M9	magenta	0.148742	-0.0947569	-0.881134	-0.534945	-0.665191	-0.0491423	0.156905	-0.382801	-0.0108732	0.278259	0.108011	0.512648	0.70718	0.567157	0.817061	0.653873	0.785505	0.622248	0.372138	0.348083	0.528685	0.559709	0.721713	-0.057602	-0.283993	-0.34001	-0.0940088	-0.02163	magenta|0.8171
RTN1|NP_066959.1	M9	magenta	0.0107125	0.12195	-0.780827	-0.294786	-0.544955	-0.370635	0.13495	-0.308856	0.132242	0.251296	0.294275	0.340612	0.706371	0.638884	0.812954	0.563083	0.691423	0.601913	0.439204	0.14271	0.606178	0.450457	0.570188	-0.0108045	-0.06927	-0.494158	-0.0799706	-0.136828	magenta|0.813
CADM3|NP_067012.1	M9	magenta	-0.123115	-0.139479	-0.61985	-0.407235	-0.347691	-0.12567	0.222461	-0.14519	0.211653	0.169803	-0.035256	0.376045	0.438846	0.264447	0.812412	0.336366	0.636161	0.343929	0.20203	0.0702319	0.204545	0.150969	0.407094	0.246249	-0.223475	-0.271423	0.000753073	0.132975	magenta|0.8124
COX6C|NP_004365.1	M9	magenta	-0.206937	-0.253976	-0.630332	-0.292536	-0.56988	-0.3406	-0.0370567	-0.464561	-0.176101	-0.0701678	0.276584	0.146003	0.61985	0.36872	0.801656	0.396326	0.388485	0.458631	0.16822	0.441521	0.272305	0.498049	0.711178	0.0310528	-0.230563	-0.495882	0.140675	-0.24467	magenta|0.8017
NEGR1|NP_776169.2	M9	magenta	-0.115691	0.180099	-0.513558	-0.373274	-0.191131	-0.130423	-0.204636	-0.333291	0.00252881	-0.100246	-0.0343832	0.357933	0.565255	0.17741	0.799981	0.0713106	0.374213	0.2331	0.0203305	-0.142527	-0.0895223	0.101572	0.418656	-0.0530922	-0.341115	-0.477486	-0.297579	0.135747	magenta|0.8
USP11|NP_004642.2	M9	magenta	-0.0799633	-0.0367614	-0.815658	-0.628621	-0.716734	-0.294468	0.0258252	-0.444666	-0.100987	0.0253188	-0.0928584	0.70008	0.705303	0.423295	0.796453	0.38192	0.613173	0.66966	0.436067	0.261209	0.628695	0.542158	0.790456	0.123202	-0.152795	-0.274869	0.0512616	0.135819	magenta|0.7965
GNA13|NP_006563.2	M9	magenta	-0.0294211	0.0383269	-0.487695	0.015425	-0.291978	-0.220715	0.267684	-0.133515	0.290239	0.494218	0.476862	-0.122734	0.544293	0.603145	0.788828	0.558029	0.628669	0.328224	0.315459	-0.077431	0.180004	0.203799	0.258231	0.14629	-0.0614227	-0.565978	-0.121294	-0.231436	magenta|0.7888
VDAC3|NP_001129166.1	M9	magenta	-0.219349	-0.165713	-0.721268	-0.618456	-0.687829	-0.226465	0.10381	-0.329092	0.00613525	0.125715	0.0100802	0.623949	0.494218	0.362386	0.783481	0.372425	0.665082	0.658035	0.475772	0.534704	0.59735	0.469879	0.758111	0.197514	-0.166017	-0.310366	0.213349	0.126496	magenta|0.7835
RAB10|NP_057215.3	M9	magenta	0.0230029	-0.16716	-0.685378	-0.241814	-0.568603	-0.246977	-0.166806	-0.635854	-0.24099	0.0822403	0.433626	0.118138	0.795983	0.588337	0.779689	0.528188	0.500175	0.564172	0.310598	0.271044	0.338248	0.631451	0.674019	-0.126056	-0.145326	-0.586499	-0.0758516	-0.143359	magenta|0.7797
GPM6A|NP_963885.1	M9	magenta	-0.0291568	0.283791	-0.451674	-0.186707	-0.199636	0.110725	0.358121	0.0217322	0.369238	0.260431	-0.022667	0.309223	0.334548	0.193367	0.761953	0.335856	0.64471	0.134366	0.0284399	0.0718922	0.122715	-0.0286933	0.255011	-0.0235969	-0.405726	-0.35701	-0.0622229	-0.0256805	magenta|0.762
PDE1B|NP_001159447.1	M9	magenta	-0.0835777	-0.314877	-0.687612	-0.620419	-0.625195	-0.141936	0.200107	-0.250426	-0.00017914	0.0150228	-0.302775	0.630535	0.516927	0.259267	0.760212	0.357049	0.607414	0.412346	0.169722	0.405763	0.470284	0.369078	0.64746	0.248553	-0.136175	-0.0173985	0.231906	0.0352019	magenta|0.7602
ATP5I|NP_009031.1	M9	magenta	-0.264024	-0.377483	-0.689753	-0.409455	-0.695381	-0.351531	0.13565	-0.485096	-0.214469	-0.0343416	0.0476669	0.317098	0.512104	0.305268	0.757099	0.434914	0.453111	0.576766	0.312647	0.445112	0.492666	0.593339	0.750177	0.0507605	-0.243702	-0.219586	0.495869	-0.0146424	magenta|0.7571
NDUFB7|NP_004137.2	M9	magenta	-0.267967	0.11327	-0.455347	-0.352253	-0.318346	-0.223105	0.0123942	-0.0416717	0.143431	0.0956913	0.152213	0.234743	0.405124	0.263781	0.754472	0.23921	0.392435	0.272291	0.109937	0.186668	0.0697263	0.0759951	0.473211	0.157191	-0.278148	-0.554475	-0.165335	-0.194456	magenta|0.7545
UQCRQ|NP_055217.2	M9	magenta	0.201649	-0.142364	-0.86488	-0.532211	-0.734456	-0.0945019	-0.0105637	-0.58648	-0.127873	0.185566	0.119334	0.587109	0.791994	0.605576	0.740365	0.520771	0.749854	0.714597	0.487676	0.479913	0.632387	0.72281	0.798214	-0.0617752	-0.0899279	-0.287828	-0.056109	0.0489054	magenta|0.7404
GNAI3|NP_006487.1	M9	magenta	-0.328136	0.317791	-0.355393	0.00283639	-0.0586961	-0.166957	0.143659	0.0331824	0.207262	-0.0455728	0.106374	-0.024999	0.346501	0.0749487	0.731495	0.20072	0.214879	0.0287654	-0.154799	-0.194969	-0.110506	-0.129333	0.191478	-0.0683201	-0.481343	-0.530705	-0.115144	-0.283408	magenta|0.7315
RPSA|NP_001012321.1	M9	magenta	-0.149526	0.0967655	-0.4889	0.0445792	-0.104693	-0.201117	0.140224	-0.133614	0.354202	0.363661	0.573385	-0.10097	0.41491	0.449795	0.724016	0.449188	0.576964	0.425636	0.357755	-0.223002	0.166739	0.0922696	0.163243	0.12843	-0.166716	-0.725387	-0.176651	0.0536677	magenta|0.724
ICAM5|NP_003250.3	M9	magenta	-0.320234	-0.175306	-0.567322	-0.595969	-0.321071	-0.0955352	-0.255697	-0.30144	0.0537545	-0.223559	-0.24158	0.63572	0.405503	0.00119559	0.717509	-0.117356	0.356989	0.502546	0.182447	0.189498	0.124525	0.192028	0.616965	0.297026	-0.260504	-0.312297	0.0474804	0.339391	magenta|0.7175
VDAC1|NP_003365.1	M9	magenta	-0.245854	-0.216453	-0.675622	-0.691991	-0.666898	-0.143357	0.136668	-0.245307	0.0115788	0.125693	-0.0936181	0.684353	0.385077	0.275405	0.713641	0.345408	0.651905	0.616322	0.452177	0.571824	0.583584	0.404924	0.715857	0.243283	-0.185771	-0.209216	0.237471	0.194021	magenta|0.7136
ATP5C1|NP_001001973.1	M9	magenta	-0.348166	-0.246635	-0.653832	-0.652425	-0.448851	0.0352298	0.229087	0.0115448	0.234105	0.229238	-0.219018	0.565843	0.180664	0.142102	0.711296	0.321689	0.596685	0.568788	0.316678	0.341385	0.351237	0.183541	0.566467	0.208737	-0.429535	-0.159443	0.315513	0.163863	magenta|0.7113
ATP6V1D|NP_057078.1	M9	magenta	0.0109087	0.240066	-0.3403	0.107084	-0.0675221	-0.215941	-0.0223269	-0.20608	0.144934	0.246338	0.53449	-0.24891	0.516761	0.444403	0.704626	0.322962	0.365611	0.111277	0.0586913	-0.184879	-0.20132	0.0842225	0.190539	-0.120097	-0.204165	-0.707058	-0.381565	-0.265231	magenta|0.7046
SFXN5|NP_653180.1	M9	magenta	-0.381727	0.159353	-0.468862	-0.0573761	-0.12429	-0.0630406	0.10082	-0.170487	0.13618	-0.0236948	0.275933	0.0622762	0.350237	0.0934456	0.703914	0.310976	0.356517	0.318488	0.117754	-0.123322	0.123897	0.0264619	0.233901	-0.0194869	-0.49585	-0.629476	-0.0620216	0.0772723	magenta|0.7039
RAB11B|NP_004209.2	M9	magenta	-0.284324	0.102602	-0.577238	-0.284359	-0.427742	-0.271762	-0.230452	-0.51294	-0.257955	-0.148926	0.231767	0.228615	0.631535	0.279301	0.696814	0.248427	0.246749	0.513872	0.269781	0.0256141	0.231923	0.413217	0.589135	-0.103626	-0.336422	-0.584082	-0.0965261	0.0345828	magenta|0.6968
GNAI2|NP_002061.1	M9	magenta	-0.434499	0.182704	-0.314271	-0.140395	-0.247599	-0.540437	-0.130982	-0.179117	-0.0716555	-0.0933299	0.175409	-0.0331019	0.448374	0.22506	0.693396	0.0948487	0.048823	0.185517	0.0644675	-0.192751	-0.059516	0.0887917	0.387276	0.0574584	-0.208956	-0.545837	-0.0412464	-0.261476	magenta|0.6934
GNAI1|NP_002060.4	M9	magenta	-0.335256	0.279471	-0.280311	0.0774517	0.00560282	-0.17608	0.221318	0.0978923	0.297975	0.0197842	0.0769963	-0.0891351	0.270788	0.0492986	0.693332	0.164371	0.206779	-0.00870952	-0.145906	-0.301239	-0.15021	-0.19698	0.098204	0.0288335	-0.4208	-0.465243	-0.0297647	-0.243577	magenta|0.6933
SLC30A3|NP_003450.2	M9	magenta	-0.198721	0.32208	-0.277187	0.0870948	-0.0356485	-0.0775633	0.14785	-0.0121506	0.318635	0.289557	0.394968	-0.114109	0.363239	0.263742	0.684162	0.24747	0.395456	0.142065	0.157558	-0.257524	-0.119388	-0.0936094	0.106029	0.139633	-0.278395	-0.677879	-0.309895	-0.0790359	magenta|0.6842
CD47|NP_001768.1	M9	magenta	-0.256315	0.0886	-0.535819	-0.383358	-0.437759	-0.238127	0.502468	0.0754086	0.106445	-0.0502122	-0.323217	0.418372	0.218196	0.00526417	0.682135	0.313945	0.381358	0.0983862	-0.0695278	0.280246	0.267852	0.0729758	0.461441	-0.0332278	-0.492952	-0.00972699	0.321118	-0.216998	magenta|0.6821
TTLL12|NP_055955.1	M9	magenta	-0.179362	0.223392	-0.200505	0.0617915	-0.223109	-0.310857	-0.00148159	-0.225117	0.0817102	0.228291	0.446519	-0.149132	0.499488	0.408811	0.681975	0.198396	0.320429	0.126828	0.205577	-0.0450256	-0.0493784	0.109796	0.24982	0.14632	4.75e-05	-0.638651	-0.208359	-0.224574	magenta|0.682
RAB35|NP_006852.1	M9	magenta	0.0561681	-0.17113	-0.679049	-0.273838	-0.472675	0.00162092	-0.0307728	-0.428279	-0.0494108	0.0744783	0.274632	0.327271	0.633632	0.411431	0.681326	0.568381	0.623761	0.575628	0.288692	0.202388	0.51457	0.462956	0.530417	0.0448651	-0.195113	-0.510697	-0.0626226	0.151938	magenta|0.6813
CIRBP|NP_001271.1	M9	magenta	-0.446301	-0.155987	-0.449205	-0.250046	-0.470243	-0.460304	0.0580939	-0.287845	-0.0606639	-0.132334	0.125052	0.201787	0.336855	0.103271	0.679901	0.12902	0.235003	0.431334	0.252059	0.274349	0.235309	0.311782	0.618309	0.259727	-0.238581	-0.407197	0.370001	0.00975337	magenta|0.6799
CD59|NP_976074.1	M9	magenta	-0.189678	0.0354833	-0.510341	0.00260423	-0.244937	-0.164071	0.42179	0.0641053	0.436651	0.403397	0.272988	-0.00142139	0.266757	0.364617	0.670906	0.475018	0.556602	0.398492	0.291774	0.0220773	0.314629	0.118689	0.255903	0.0904188	-0.249511	-0.397768	0.21603	-0.191154	magenta|0.6709
SHMT2|NP_001159828.1	M9	magenta	-0.291024	-0.0793382	-0.380107	-0.329424	-0.354209	-0.581717	0.219402	0.00841221	0.0392677	0.115438	0.0907094	0.0657513	0.253061	0.247457	0.660618	0.246524	0.272	0.109109	0.114299	0.0906488	-0.00751531	0.078213	0.396268	0.214417	-0.141625	-0.256384	0.0764041	-0.22472	magenta|0.6606
NRCAM|NP_001180513.1	M9	magenta	-0.314297	0.391865	-0.132514	0.0328023	-0.0610658	-0.44062	-0.121131	-0.172231	-0.0481706	-0.223062	0.0709415	-0.0786958	0.414228	0.0654561	0.606139	-0.132936	-0.0556259	-0.127404	-0.157129	-0.235858	-0.299966	-0.0743934	0.205693	-0.0620457	-0.195582	-0.44119	-0.182851	-0.306076	magenta|0.6061
PLXNA3|NP_059984.2	M9	magenta	0.0612079	0.294449	-0.453641	0.0729439	-0.0215284	0.167912	0.324091	-0.0660317	0.260674	0.0560719	0.248074	0.0801453	0.211785	0.0347873	0.601172	0.423055	0.51341	0.10146	-0.120659	0.0390415	0.0523957	-0.00698357	0.160206	-0.344741	-0.665593	-0.509804	-0.0667179	0.0632031	magenta|0.6012
VARS|NP_006286.1	M9	magenta	0.0221007	0.307511	-0.377271	-0.425784	-0.32441	-0.0938909	-0.0755181	-0.290298	-0.0399792	0.202041	0.0725855	0.422225	0.525813	0.364345	0.600185	0.177908	0.498817	0.229295	0.312733	-0.014667	0.117592	0.158583	0.339219	0.0564565	-0.05754	-0.377861	-0.45938	0.196208	magenta|0.6002
OPCML|NP_002536.1	M9	magenta	-0.269203	-0.0180677	-0.243642	-0.369468	-0.155406	-0.0729699	-0.0538367	-0.151401	-0.102567	-0.095762	-0.20593	0.200869	0.196095	-0.0553578	0.567802	-0.00874918	0.144631	0.00720504	-0.119755	0.0103368	-0.269479	-0.00959333	0.311491	-0.0504372	-0.406691	-0.174249	0.0346299	0.0614713	magenta|0.5678
ANKMY2|NP_064715.1	M9	magenta	-0.239668	0.228321	-0.146081	-0.0429286	-0.0741467	-0.388319	-0.32629	-0.202064	-0.136782	-0.314104	0.120189	-0.0688506	0.490376	0.114279	0.553668	-0.0792629	-0.0966622	-0.0877661	-0.245894	-0.155573	-0.269899	-0.0247462	0.257208	-0.00267245	-0.110712	-0.514727	-0.315729	-0.362843	magenta|0.5537
CCT4|NP_006421.2	M9	magenta	0.0918433	0.469012	-0.449808	-0.0388989	0.00243563	0.231361	0.253161	-0.103168	0.287884	0.116215	-0.0479703	0.291801	0.323572	0.119345	0.542067	0.236128	0.5333	0.0794034	0.0126284	-0.11735	0.135392	-0.0461703	0.0252118	-0.413184	-0.420718	-0.211377	-0.219281	0.0824083	magenta|0.5421
ATP6V0C|NP_001185498.1	M9	magenta	-0.0958741	0.0855614	-0.512338	-0.379227	-0.383283	-0.0359766	0.484293	0.132998	0.104865	0.16977	-0.261284	0.325492	0.160285	0.0979333	0.53581	0.406305	0.385672	0.119299	-0.0115967	0.220041	0.174714	0.0958903	0.392549	-0.161856	-0.537259	0.0385558	0.174326	-0.243015	magenta|0.5358
PLXNA2|NP_079455.3	M9	magenta	0.196769	0.378707	-0.413462	0.232268	0.0929609	0.181487	0.339118	0.00462368	0.352693	0.0748467	0.343203	-0.0309301	0.203373	0.0634148	0.515661	0.439543	0.486769	0.0349074	-0.192067	-0.0499218	0.0199374	-0.061447	0.0515542	-0.390284	-0.621541	-0.546914	-0.179216	-0.0263075	magenta|0.5157
DLST|NP_001924.2	M9	magenta	0.307512	0.351525	-0.672523	-0.255388	-0.37715	0.152907	0.0552255	-0.473603	-0.0672068	-0.0687703	-0.0701243	0.586112	0.620031	0.262258	0.511169	0.313363	0.556697	0.349285	0.148397	0.234557	0.470116	0.41001	0.447967	-0.484093	-0.331074	-0.170967	-0.216497	0.0882188	magenta|0.5112
WDR13|NP_060353.2	M9	magenta	-0.423668	0.118527	-1.38e-05	-0.329971	-0.185584	-0.435483	-0.0264289	-0.139753	-0.18926	-0.00193096	-0.111523	0.0916636	0.0948272	0.0387634	0.457567	-0.141197	0.0465153	-0.134903	0.0853318	0.019027	-0.236075	-0.061597	0.169183	0.00988968	-0.0457088	-0.0776147	0.08115	0.0214637	magenta|0.4576
NDUFAF2|NP_777549.1	M9	magenta	-0.0702616	0.372866	0.00963649	0.158791	-0.011117	-0.53447	0.205128	0.209298	0.250979	0.1865	0.117963	-0.252013	0.206147	0.277098	0.412926	-0.000490721	0.0524026	-0.308537	-0.11873	-0.169107	-0.245294	-0.190266	-0.0128752	0.0282377	0.135743	-0.183906	-0.141581	-0.61172	magenta|0.4129
CD200|NP_005935.4	M9	magenta	0.052771	0.191163	-0.340267	-0.424321	-0.0414037	0.21052	-0.270716	-0.235654	-0.15203	-0.45199	-0.47168	0.552756	0.317267	-0.241489	0.383643	-0.197093	0.0754217	-0.0335673	-0.336869	-0.00830188	-0.215997	-0.0172625	0.316307	-0.252412	-0.484154	-0.0581243	-0.314758	0.192659	magenta|0.3836
CCT7|NP_001159757.1	M9	magenta	0.514683	0.455617	-0.406885	0.058027	0.0936121	0.372996	0.0587878	-0.107951	0.357232	0.0497928	-0.0251144	0.338352	0.427935	0.18764	0.359073	0.187653	0.525061	0.0524406	-0.150551	-0.0934965	0.152583	0.000297203	0.0181681	-0.367893	-0.207558	-0.228458	-0.460601	0.0294111	magenta|0.3591
MBLAC2|NP_981951.1	M9	magenta	-0.206796	0.0734862	-0.0716844	-0.216619	-0.126138	-0.13735	0.393187	0.168543	0.130401	0.257372	-0.0967597	0.0659724	0.026008	0.127982	0.351215	0.213267	0.299324	-0.172793	0.0309152	0.0372899	0.0199313	-0.180623	-0.0677759	0.112565	-0.0126218	0.0586504	-0.000391148	-0.121377	magenta|0.3512
CCT3|NP_005989.3	M9	magenta	0.416625	0.473657	-0.479094	0.152198	-0.145878	0.139662	0.203099	-0.269278	0.0513731	-0.118905	0.113828	0.205431	0.396343	0.147152	0.323489	0.321416	0.361952	0.0808743	-0.15756	0.259196	0.286436	0.27031	0.255689	-0.716935	-0.438154	-0.207417	-0.119778	-0.234487	magenta|0.3235
AK4|NP_037542.1	M9	magenta	-0.366329	-0.0264132	0.101733	-0.124133	-0.158557	-0.662037	-0.285551	-0.329421	-0.283219	-0.117471	0.141443	-0.128043	0.1784	0.137488	0.322773	-0.304384	-0.138814	-0.0689447	0.151586	0.067695	-0.263302	0.0981783	0.198608	0.100777	0.278697	-0.165515	0.0901476	-0.0737459	magenta|0.3228
NDRG4|NP_065198.1	M9	magenta	-0.54835	0.016678	0.0353029	-0.385641	-0.235588	-0.487386	-0.23921	-0.181712	-0.201038	-0.042854	-0.000573412	0.187222	0.139356	0.0915671	0.317475	-0.245399	-0.00776695	0.107506	0.35745	0.0420325	-0.00126675	0.000561996	0.190907	0.366266	0.261035	-0.169774	-0.0234258	0.170935	magenta|0.3175
C2CD2|NP_950251.1	M9	magenta	-0.466741	-0.0484325	-0.135905	0.0208015	-0.213028	-0.263608	0.413049	0.0821706	-0.0541717	-0.140228	-0.105856	-0.0961687	-0.0188904	-0.14468	0.313011	0.197967	-0.0470145	-0.0501864	-0.11436	0.0704487	0.107937	-0.0202135	0.134908	0.0083422	-0.345841	0.0140553	0.483659	-0.271503	magenta|0.313
EXD2|NP_060669.1	M19	lightyellow	0.251938	-0.444526	-0.522554	-0.327474	-0.668514	0.0277489	0.287813	-0.422273	-0.322466	-0.0224115	-0.0283805	0.359165	0.257922	0.21121	0.188096	0.481437	0.401307	0.366631	0.160006	0.92186	0.603652	0.687844	0.622016	-0.233932	-0.144383	0.226962	0.45383	-0.110631	lightyellow|0.9219
ARMC10|NP_114111.2	M19	lightyellow	0.0744903	-0.429295	-0.359841	-0.468158	-0.604314	0.104505	0.301546	-0.299037	-0.330262	0.0116667	-0.270691	0.425053	0.0782287	0.0564488	0.167627	0.299986	0.335788	0.198723	0.130655	0.907582	0.410009	0.502358	0.516113	-0.194738	-0.17198	0.40958	0.505718	-0.0237775	lightyellow|0.9076
SLC25A1|NP_005975.1	M19	lightyellow	0.146523	-0.524729	-0.297104	-0.31944	-0.465851	0.156387	0.293071	-0.180332	-0.243452	-0.0165913	-0.148759	0.27028	-0.0367356	0.036826	-0.00847091	0.368865	0.259659	0.181629	0.014085	0.893931	0.453543	0.440083	0.38647	-0.192759	-0.121149	0.376553	0.508374	-0.110532	lightyellow|0.8939
GK|NP_000158.1	M19	lightyellow	-0.155292	-0.436266	-0.334263	-0.429939	-0.596738	-0.0271166	-0.0342387	-0.416646	-0.438676	-0.276938	-0.1502	0.394046	0.142045	-0.0552709	0.204886	0.120279	0.104103	0.360024	0.111477	0.880427	0.367836	0.549794	0.689412	-0.0840544	-0.236607	0.0946707	0.537595	0.00631363	lightyellow|0.8804
MCU|NP_612366.1	M19	lightyellow	-0.180506	-0.671911	-0.355187	-0.553609	-0.705147	-0.212265	0.0895526	-0.454532	-0.537191	-0.115966	-0.0642614	0.365535	0.0882262	0.0897505	0.157585	0.302143	0.220351	0.412215	0.33617	0.875367	0.538392	0.625888	0.616756	0.0468771	-0.0104878	0.238139	0.613178	0.171663	lightyellow|0.8754
SRSF1|NP_008855.1	M19	lightyellow	0.0936433	-0.318213	-0.515571	-0.509409	-0.577546	0.172122	0.00709053	-0.399964	-0.325153	-0.0916679	-0.0560511	0.531703	0.212406	0.0973293	0.19134	0.314026	0.348824	0.485738	0.229114	0.852371	0.505914	0.582712	0.658591	-0.211815	-0.288406	0.0355875	0.238882	0.117325	lightyellow|0.8524
ND1|YP_003024026.1	M19	lightyellow	0.030827	-0.452164	-0.409286	-0.348917	-0.622628	-0.148214	-0.0864033	-0.493369	-0.406815	-0.114407	0.130603	0.247334	0.299294	0.209743	0.254099	0.248058	0.202127	0.437177	0.216947	0.848908	0.364347	0.670816	0.724185	-0.0796974	-0.0846986	-0.064407	0.353924	-0.105009	lightyellow|0.8489
LRRC8A|NP_001120717.1	M19	lightyellow	-0.026446	-0.745713	-0.331814	-0.59902	-0.765652	-0.227706	0.132978	-0.318242	-0.443408	0.0324582	-0.222578	0.417383	0.119803	0.23358	0.0636426	0.335884	0.237369	0.419715	0.349521	0.8317	0.652994	0.65035	0.60791	0.192048	0.234145	0.442539	0.641239	0.0154931	lightyellow|0.8317
COX1|YP_003024028.1	M19	lightyellow	0.0106238	-0.463166	-0.430712	-0.445447	-0.615489	-0.0495939	0.383493	-0.168868	-0.218847	0.00483934	-0.234703	0.37518	0.157528	0.156669	0.260427	0.445615	0.374573	0.192213	0.0668259	0.826546	0.553442	0.433285	0.468378	-0.0652908	-0.0673757	0.352469	0.486566	-0.219044	lightyellow|0.8265
GTDC2|NP_116195.2	M19	lightyellow	0.237702	-0.491205	-0.413635	-0.363863	-0.708354	-0.224998	0.139973	-0.416678	-0.476027	-0.00732725	0.0029241	0.290727	0.23518	0.337907	0.00875034	0.470421	0.245268	0.382736	0.270349	0.82168	0.701478	0.749076	0.574901	-0.207635	0.144067	0.324742	0.470091	-0.153319	lightyellow|0.8217
ABCD3|NP_002849.1	M19	lightyellow	0.0461979	-0.619666	-0.590341	-0.473651	-0.803282	-0.150841	0.321822	-0.434001	-0.330218	0.0928263	-0.0261358	0.423774	0.290803	0.327594	0.277053	0.572293	0.500915	0.557492	0.436741	0.819709	0.817863	0.741681	0.640775	0.0424937	0.0357951	0.250077	0.584234	0.0608113	lightyellow|0.8197
PALM|NP_001035224.1	M19	lightyellow	-0.0653375	-0.290125	-0.628406	-0.625667	-0.792281	-0.153414	0.388519	-0.266583	-0.178821	0.124349	-0.208744	0.598415	0.316119	0.284287	0.509657	0.470336	0.572607	0.422694	0.336482	0.815946	0.669675	0.540045	0.690271	-0.0172215	-0.148292	0.182587	0.432734	-0.0759116	lightyellow|0.8159
NDUFB6|NP_002484.1	M19	lightyellow	0.184957	-0.350437	-0.435621	-0.281046	-0.659387	-0.151566	0.109952	-0.502565	-0.472282	-0.273537	-0.128377	0.376905	0.278121	0.0966319	0.112809	0.275682	0.157153	0.333881	0.0926488	0.81488	0.564854	0.71214	0.674392	-0.273373	-0.113336	0.24988	0.531607	-0.105641	lightyellow|0.8149
PRODH|NP_057419.4	M19	lightyellow	-0.161739	-0.429152	-0.108526	-0.255702	-0.521516	-0.273081	0.0429671	-0.377853	-0.689941	-0.431981	-0.118318	0.0751182	0.0158925	-0.129085	0.00704003	0.142435	-0.196011	-0.0131911	-0.145544	0.806299	0.211105	0.469919	0.491231	-0.284098	-0.169422	0.269989	0.58873	-0.242781	lightyellow|0.8063
CAMKK2|NP_705720.1	M19	lightyellow	-0.0549941	-0.676303	-0.322391	-0.551222	-0.745767	-0.156032	0.117947	-0.404294	-0.613208	-0.224821	-0.340387	0.382882	0.215756	0.0516526	0.153261	0.281149	0.0982455	0.209655	0.0642584	0.795045	0.436042	0.60311	0.634894	0.0639123	-0.00486264	0.433298	0.564205	-0.0789747	lightyellow|0.795
GEM|NP_859053.1	M19	lightyellow	-0.0408576	-0.281181	-0.33686	-0.458578	-0.630304	-0.181037	0.121525	-0.24425	-0.384837	0.0453008	0.0189158	0.289729	0.0992791	0.196182	0.173116	0.382551	0.210875	0.327852	0.230636	0.760567	0.43458	0.518236	0.607867	-0.174939	-0.169979	0.0594674	0.393363	-0.123176	lightyellow|0.7606
ATP5L|NP_006467.4	M19	lightyellow	-0.0113176	-0.401574	-0.704107	-0.583237	-0.860309	-0.101952	0.213695	-0.510266	-0.231258	0.139639	-0.0481781	0.604006	0.536583	0.429011	0.58005	0.529708	0.669633	0.650652	0.49798	0.759524	0.805171	0.722075	0.769937	0.100543	-0.0190899	0.0063494	0.386294	0.0769874	lightyellow|0.7595
COX4I1|NP_001852.1	M19	lightyellow	0.0775657	-0.616075	-0.105923	-0.260585	-0.310916	0.170441	-0.0486034	-0.325903	-0.366518	-0.0833963	-0.0737821	0.161619	-0.106195	-0.026154	-0.170101	0.103569	0.0753751	0.21169	0.119997	0.75911	0.265753	0.440496	0.27912	-0.159748	0.0409383	0.353781	0.470968	0.133378	lightyellow|0.7591
MARC1|NP_073583.3	M19	lightyellow	0.247344	-0.313273	-0.318806	-0.335535	-0.542245	0.230187	0.460563	-0.208854	-0.190403	0.26244	-0.0818381	0.371548	0.0653857	0.212018	0.0487631	0.531577	0.520142	0.223351	0.273031	0.752615	0.623751	0.452485	0.29288	-0.140343	-0.0240959	0.353978	0.335197	0.0881106	lightyellow|0.7526
HSDL1|NP_113651.4	M19	lightyellow	-0.0683613	-0.205729	-0.361468	-0.511678	-0.617011	-0.0244027	0.0858806	-0.458515	-0.337084	-0.09345	-0.288314	0.552688	0.280628	0.069772	0.393343	0.0863558	0.339684	0.253323	0.203667	0.751959	0.34517	0.480241	0.612919	-0.101038	-0.130018	0.182646	0.386649	0.0983069	lightyellow|0.752
TOMM40|NP_006105.1	M19	lightyellow	-0.108925	-0.403327	-0.542344	-0.596886	-0.657857	-0.0397423	0.0657919	-0.458229	-0.279765	0.0386178	-0.0153322	0.476954	0.36583	0.223821	0.580512	0.352278	0.52359	0.438727	0.29865	0.731443	0.374001	0.519936	0.688734	0.0446548	-0.205861	-0.108526	0.261546	0.152941	lightyellow|0.7314
FBXL16|NP_699181.2	M19	lightyellow	-0.338332	-0.545366	-0.0868099	-0.392853	-0.583297	-0.42304	-0.152963	-0.520874	-0.791553	-0.427501	-0.156277	0.121758	0.112382	-0.0448395	0.0588394	-0.0073973	-0.235223	0.089419	0.0588538	0.727543	0.212324	0.522899	0.517259	-0.10584	0.069239	0.303769	0.578257	-0.131137	lightyellow|0.7275
AGPAT3|NP_001032642.1	M19	lightyellow	0.413749	-0.482605	-0.327057	-0.337555	-0.665185	0.0279712	0.220704	-0.411734	-0.403416	0.0122878	-0.223068	0.41236	0.304098	0.289039	-0.0677128	0.40191	0.303551	0.267274	0.186086	0.715693	0.709468	0.675403	0.449833	-0.0288152	0.280643	0.513593	0.358135	-0.0631642	lightyellow|0.7157
ATP5S|NP_001003803.1	M19	lightyellow	-0.149134	-0.568542	0.128823	-0.236381	-0.385516	-0.257075	-0.0396634	-0.0874623	-0.416397	-0.244813	-0.106397	0.0389747	-0.132195	-0.113911	-0.174001	-0.0530818	-0.242379	-0.0160336	-0.038866	0.683775	0.118241	0.273305	0.347712	0.297165	0.209899	0.26978	0.453122	-0.171044	lightyellow|0.6838
COPG1|NP_057212.1	M19	lightyellow	0.0952474	-0.470304	-0.237394	-0.245658	-0.367479	0.0527661	0.231375	-0.0551495	-0.0345184	0.0457158	-0.0227608	0.306035	-0.12225	0.0255793	-0.149733	0.213407	0.229943	0.368007	0.278302	0.678459	0.547533	0.361948	0.314467	0.189275	0.0853946	0.25523	0.405991	0.136201	lightyellow|0.6785
SLC2A1|NP_006507.2	M19	lightyellow	-0.0621249	-0.79654	-0.201929	-0.29275	-0.502266	-0.127981	0.207397	-0.181994	-0.277858	0.117556	-0.0117329	0.064072	-0.0335671	0.187183	0.00878254	0.384057	0.199319	0.272436	0.243783	0.675651	0.478436	0.459153	0.315357	0.145147	0.204754	0.351571	0.636734	-0.0505632	lightyellow|0.6757
NDUFC2|NP_004540.1	M19	lightyellow	-0.1653	-0.282895	-0.490291	-0.657085	-0.684203	-0.191841	0.15028	-0.25609	-0.347109	-0.106467	-0.427945	0.566257	0.257253	0.143723	0.371054	0.271081	0.258852	0.290921	0.133237	0.672428	0.515022	0.458354	0.62665	-0.165348	-0.150581	0.323727	0.468286	-0.168921	lightyellow|0.6724
USMG5|NP_001193356.1	M19	lightyellow	0.00415926	-0.20269	-0.0868585	-0.299679	-0.535647	-0.144877	0.223791	-0.0672139	-0.329943	0.0974275	-0.110723	0.194773	-0.00589253	0.182028	-0.0820352	0.309453	0.0760386	0.114516	0.164768	0.669291	0.484848	0.379246	0.341855	-0.109807	0.102723	0.319411	0.406219	-0.28733	lightyellow|0.6693
C21orf33|NP_004640.3	M19	lightyellow	-0.34633	-0.304993	-0.0617671	-0.197096	-0.524649	-0.39278	-0.224524	-0.521804	-0.712952	-0.427497	0.0641708	0.0329407	0.139691	-0.0554837	0.0757455	-0.0286974	-0.277783	0.187867	0.0990543	0.640123	0.187104	0.526983	0.565607	-0.139155	-0.07081	-0.0141291	0.507036	-0.12772	lightyellow|0.6401
|NP_001186783.1	M19	lightyellow	-0.383387	-0.279465	-0.0794127	-0.373688	-0.207676	-0.0173497	-0.425035	-0.392673	-0.52503	-0.64444	-0.182997	0.300862	-0.055631	-0.423225	0.0467221	-0.325619	-0.289912	0.155318	-0.109675	0.576004	-0.0786418	0.232103	0.473642	-0.141816	-0.362297	-0.0457658	0.296478	0.231717	lightyellow|0.576
ACAD9|NP_054768.2	M19	lightyellow	0.0558019	-0.203684	0.0780196	-0.0353725	-0.104645	0.00059745	0.170342	0.194339	-0.108682	-0.172594	-0.113367	9.81e-05	-0.349047	-0.251024	-0.299076	-0.0227375	-0.217392	-0.112851	-0.220818	0.560291	0.0118609	0.0762803	0.169517	-0.0920954	-0.161891	0.268365	0.344401	-0.23994	lightyellow|0.5603
SAMM50|NP_056195.3	M19	lightyellow	-0.237706	-0.45146	-0.00638668	-0.175984	-0.110268	0.184829	0.0753546	0.0609593	-0.123618	-0.295691	-0.203966	0.122972	-0.357594	-0.436505	-0.0674234	-0.0612562	-0.122569	0.0624557	-0.205622	0.558711	-0.00897737	0.0689655	0.258519	0.0729765	-0.379301	0.132838	0.565819	0.134612	lightyellow|0.5587
SCO1|NP_004580.1	M19	lightyellow	0.186589	-0.467343	-0.213812	-0.0726602	-0.189755	0.496989	0.169792	-0.0324699	0.0612912	-0.00175716	-0.096717	0.183641	-0.0454279	-0.0994428	-0.044222	0.236897	0.214416	0.260518	-0.0639073	0.548227	0.272192	0.254504	0.257253	0.0746048	-0.224699	0.122993	0.336188	0.0336153	lightyellow|0.5482
MFF|NP_064579.3	M19	lightyellow	-0.21036	-0.276403	0.0228568	-0.312107	0.0211158	0.472177	0.260285	0.252553	0.131611	-0.229024	-0.573654	0.455613	-0.501273	-0.61878	-0.110197	-0.222273	0.0411154	-0.0600357	-0.205285	0.512413	0.00844111	-0.200981	0.0634154	0.130854	-0.406706	0.399663	0.468975	0.360909	lightyellow|0.5124
FYN|NP_002028.1	M19	lightyellow	0.028008	0.0729111	0.0281919	-0.0629246	0.0151574	0.0811593	-0.0102564	0.116171	-0.106614	-0.368786	-0.187823	0.133624	-0.243162	-0.38371	-0.129165	-0.181251	-0.228771	-0.162761	-0.366901	0.386641	-0.163082	-0.0289096	0.197641	-0.235379	-0.391907	0.0637349	0.137282	-0.087134	lightyellow|0.3866
RPL4|NP_000959.2	M18	lightgreen	0.436848	0.10283	0.0792771	0.26748	0.449936	0.96472	0.0676997	0.211362	0.323457	0.0530047	-0.108285	0.031705	-0.190955	-0.269905	-0.294492	0.0633613	0.139553	-0.1447	-0.331062	-0.124013	-0.11533	-0.267295	-0.405095	-0.239873	-0.31559	0.0612518	-0.296032	0.236979	lightgreen|0.9647
RPL8|NP_000964.1	M18	lightgreen	0.259067	0.112311	0.201333	0.27409	0.599829	0.944059	0.0318578	0.309805	0.328801	-0.0701011	-0.177883	-0.0161073	-0.399987	-0.487831	-0.3766	-0.106134	-0.0319631	-0.237536	-0.422954	-0.206371	-0.286131	-0.434902	-0.499976	-0.238495	-0.427256	0.0820813	-0.223859	0.329297	lightgreen|0.9441
RPL19|NP_000972.1	M18	lightgreen	0.31063	0.0565361	-0.0394019	0.0230489	0.331628	0.911288	0.280798	0.318946	0.354574	-0.0419817	-0.476011	0.314775	-0.348848	-0.449802	-0.265362	-0.0260157	0.160532	-0.152763	-0.358645	0.107822	-0.0185947	-0.286064	-0.278002	-0.283207	-0.464011	0.382791	-0.00729332	0.24262	lightgreen|0.9113
RPL21|NP_000973.2	M18	lightgreen	0.30612	0.00263822	0.0813024	0.211029	0.431292	0.902345	0.439136	0.484796	0.601081	0.318919	-0.25427	0.0374737	-0.391987	-0.260796	-0.22288	0.122513	0.292962	-0.173043	-0.246047	-0.106475	-0.0649609	-0.405499	-0.490595	-0.0431306	-0.276614	0.272339	-0.0137513	0.194717	lightgreen|0.9023
RPL13|NP_000968.2	M18	lightgreen	0.498574	0.0848196	-0.0294829	0.275331	0.452358	0.899495	0.0765415	0.181089	0.368509	0.0998507	-0.0448635	0.00201803	-0.157227	-0.169475	-0.267341	0.127476	0.193011	-0.0688561	-0.296253	-0.118879	-0.0680959	-0.203211	-0.383055	-0.361647	-0.312465	0.0605924	-0.280081	0.16882	lightgreen|0.8995
RPL27|NP_000979.1	M18	lightgreen	0.34058	0.145561	0.215207	0.421908	0.612044	0.873253	0.0147922	0.240881	0.288519	-0.16578	-0.100777	-0.128808	-0.328051	-0.491323	-0.371172	-0.113181	-0.110325	-0.289679	-0.533447	-0.233585	-0.347926	-0.387377	-0.464506	-0.290948	-0.448395	0.011736	-0.219721	0.21921	lightgreen|0.8733
RPL32|NP_001007075.1	M18	lightgreen	0.133802	-0.0523624	0.0343065	0.0573305	0.437938	0.834337	-0.0176634	0.226764	0.325722	0.00512228	-0.117727	0.155474	-0.378939	-0.371096	-0.326021	-0.06297	0.103947	0.0694591	-0.106711	-0.0463759	-0.0306027	-0.280449	-0.345846	-0.102502	-0.317923	0.0635376	-0.136269	0.48955	lightgreen|0.8343
RPL24|NP_000977.1	M18	lightgreen	0.223844	0.142676	0.00309425	0.00118071	0.494104	0.830037	-0.0980672	0.287522	0.292713	-0.227747	-0.385986	0.246091	-0.285335	-0.520428	-0.212525	-0.213132	-0.0444661	-0.159365	-0.478736	-0.148662	-0.325372	-0.394559	-0.243374	-0.262047	-0.561164	0.080551	-0.288377	0.287485	lightgreen|0.83
SH3GL1|NP_003016.1	M18	lightgreen	0.232477	0.207514	0.0677931	0.252851	0.552684	0.807294	0.161601	0.425155	0.586655	0.151474	-0.001911	-0.0354343	-0.251069	-0.297368	-0.0946045	0.00425222	0.178873	-0.161376	-0.313729	-0.297296	-0.319668	-0.504949	-0.421527	0.0282596	-0.41687	-0.191061	-0.425733	0.214941	lightgreen|0.8073
RPS11|NP_001006.1	M18	lightgreen	0.229648	0.192948	0.213826	0.143893	0.590937	0.79969	0.22591	0.553075	0.516031	0.239952	-0.193014	0.0103794	-0.512657	-0.347491	-0.352295	-0.0772042	0.102947	-0.297288	-0.245919	-0.235708	-0.30042	-0.570582	-0.596013	-0.11647	-0.2807	0.19349	-0.31828	0.272734	lightgreen|0.7997
RPL34|NP_000986.2	M18	lightgreen	0.410104	0.27532	-0.0342068	0.269549	0.463674	0.795207	0.193441	0.357756	0.577084	0.314828	0.0616352	0.00222352	-0.138739	-0.0353774	-0.150314	0.176843	0.332296	-0.0689652	-0.138704	-0.223341	-0.0243849	-0.342752	-0.466374	-0.199147	-0.213749	-0.0692967	-0.449906	0.118683	lightgreen|0.7952
RPS24|NP_001017.1	M18	lightgreen	0.477874	0.265742	-0.198809	0.0764974	0.357778	0.778808	-0.0199455	0.114341	0.465706	0.226069	-0.107588	0.243091	0.0715221	0.0194997	-0.0264711	0.0797792	0.377019	0.1108	-0.0666455	-0.30044	0.00737897	-0.171189	-0.258799	-0.253669	-0.225066	-0.0508305	-0.465498	0.287539	lightgreen|0.7788
RPL29|NP_000983.1	M18	lightgreen	0.326961	0.038849	-0.191821	0.210482	0.213005	0.769236	0.23036	0.0695743	0.354252	-0.000399623	-0.182971	0.152887	-0.00354756	-0.204299	-0.00948752	0.12283	0.266494	0.0504286	-0.24248	-0.00128662	0.0776254	-0.0695318	-0.130994	-0.199768	-0.398905	0.0678417	-0.0129699	0.144226	lightgreen|0.7692
ARF4|NP_001651.1	M18	lightgreen	0.143954	0.0263474	0.397675	0.373702	0.614451	0.744333	0.107203	0.430109	0.220374	-0.00564238	-0.0951943	-0.294786	-0.619328	-0.477974	-0.615797	-0.103778	-0.270877	-0.357851	-0.402495	-0.164225	-0.333009	-0.454777	-0.619825	-0.292178	-0.300809	0.249648	-0.0532655	0.0998066	lightgreen|0.7443
RPL7A|NP_000963.1	M18	lightgreen	0.0505452	-0.17444	0.252228	0.156484	0.327135	0.743478	0.162334	0.345656	0.270776	0.0654999	-0.214256	-0.0899245	-0.410756	-0.393563	-0.25279	-0.09119	-0.041283	-0.228862	-0.329626	0.131375	-0.290985	-0.319291	-0.291978	0.0436114	-0.281983	0.190974	0.0949366	0.0527444	lightgreen|0.7435
RPS14|NP_005608.1	M18	lightgreen	0.129917	0.0294193	0.0150103	0.130912	0.44405	0.739139	0.119617	0.375547	0.439433	-0.124733	-0.413497	0.212402	-0.389343	-0.524368	-0.250054	-0.191137	0.00496262	-0.046911	-0.299527	-0.176326	-0.110527	-0.355096	-0.291012	-0.0658893	-0.4306	0.221112	0.06889	0.361021	lightgreen|0.7391
CAMK1D|NP_065130.1	M18	lightgreen	0.569963	0.374717	-0.303186	0.17911	0.258304	0.738673	0.406117	0.297572	0.562544	0.102764	-0.151825	0.227414	0.0221861	-0.118459	0.129009	0.278187	0.446519	-0.124447	-0.440049	0.0276758	0.0111192	-0.215928	-0.118452	-0.400219	-0.573708	-0.0578373	-0.287548	-0.0827321	lightgreen|0.7387
RPL9|NP_001020092.1	M18	lightgreen	0.407358	0.12836	-0.367666	-0.0972748	0.21018	0.722294	0.289141	0.250337	0.516118	0.236239	-0.278979	0.40928	-0.00448625	-0.0445241	0.0513828	0.260817	0.507005	0.151074	-0.0601861	-0.214879	0.201448	-0.175179	-0.181091	-0.131296	-0.348797	0.115141	-0.273929	0.331556	lightgreen|0.7223
RPL13A|NP_036555.1	M18	lightgreen	0.397468	0.0848122	0.0998088	-0.0526634	0.329878	0.715761	0.0946749	0.311723	0.244322	0.0584018	-0.396572	0.317985	-0.325664	-0.277271	-0.454761	-0.0870724	0.0978328	-0.165496	-0.155104	-0.056184	0.0310148	-0.278823	-0.387804	-0.131573	-0.0607569	0.4351	-0.256592	0.352733	lightgreen|0.7158
RPL12|NP_000967.1	M18	lightgreen	0.251142	0.317101	-0.210673	-0.161746	0.248469	0.704339	0.296376	0.42014	0.586504	0.284416	-0.395618	0.47697	-0.109707	-0.10956	0.0304657	0.100954	0.44715	0.0340093	-0.0382586	-0.229347	0.131964	-0.35658	-0.257069	-0.0362765	-0.293945	0.145773	-0.328602	0.29977	lightgreen|0.7043
|NP_001136152.1	M18	lightgreen	-0.0154308	-0.0651336	0.211328	0.170353	0.374887	0.701939	0.31205	0.460836	0.398055	0.0766176	-0.38425	0.0539704	-0.508723	-0.452462	-0.392798	-0.107903	-0.041536	-0.122453	-0.168502	-0.138057	-0.0152093	-0.392757	-0.442328	0.0977526	-0.214555	0.38591	0.200413	0.244977	lightgreen|0.7019
SCN2B|NP_004579.1	M18	lightgreen	0.373926	0.0399327	-0.0423119	-0.0374088	0.250538	0.684785	0.262626	0.336995	0.561951	0.357756	-0.280299	0.238277	-0.136098	-0.0331504	-0.0347856	0.00486129	0.4002	-0.0992953	-0.114511	0.0501994	-0.0670631	-0.274368	-0.253741	0.0499129	-0.0474064	0.233235	-0.223339	0.0912022	lightgreen|0.6848
RPL35A|NP_000987.2	M18	lightgreen	-0.0565174	-0.226545	0.342538	0.00511824	0.463964	0.666686	0.0100398	0.417316	0.194548	-0.218208	-0.523013	0.107946	-0.72462	-0.700881	-0.571295	-0.404656	-0.314954	-0.217432	-0.36982	0.0743905	-0.271054	-0.411423	-0.352541	-0.0244629	-0.282959	0.487136	0.287826	0.32412	lightgreen|0.6667
RPL14|NP_001030168.1	M18	lightgreen	0.0354395	0.0476192	-0.00898891	-0.0562169	0.425857	0.655536	0.0501463	0.410817	0.382368	-0.0613457	-0.290591	0.246701	-0.438113	-0.432268	-0.249618	-0.0371793	0.0485725	0.0326354	-0.232913	-0.194224	-0.0107716	-0.395671	-0.294176	-0.0954297	-0.44233	0.0704687	-0.0421453	0.422094	lightgreen|0.6555
RPL27A|NP_000981.1	M18	lightgreen	0.251331	0.0775844	-0.18278	-0.14984	0.232287	0.651191	0.174964	0.152759	0.245134	-0.118816	-0.566344	0.472421	-0.158093	-0.32665	-0.0905056	-0.00827042	0.234996	-0.068761	-0.263371	-0.0600302	0.121064	-0.209411	-0.213283	-0.314217	-0.345069	0.39762	-0.00911129	0.364871	lightgreen|0.6512
RPL28|NP_001129606.1	M18	lightgreen	-0.0418311	-0.204382	-0.125555	-0.30697	0.215671	0.625056	0.04898	0.300395	0.41312	0.180343	-0.37881	0.442499	-0.31261	-0.23894	-0.14778	-0.0597867	0.251971	0.302971	0.173687	-0.156599	0.15585	-0.237615	-0.174844	0.274847	-0.15912	0.210894	0.00404714	0.622944	lightgreen|0.6251
DPYSL3|NP_001184223.1	M18	lightgreen	0.182614	-0.0252953	0.0676482	0.367173	0.578249	0.59934	-0.0831477	0.267688	0.424453	-0.228016	0.00258457	-0.152495	-0.266398	-0.395538	-0.198573	-0.153783	-0.0929351	-0.127324	-0.497759	-0.112298	-0.294534	-0.35014	-0.319737	-0.141773	-0.344696	-0.129492	-0.11949	0.046675	lightgreen|0.5993
NRXN1|NP_004792.1	M18	lightgreen	0.436006	0.0793369	-0.286291	-0.0969787	0.0696008	0.596439	0.209029	0.109561	0.120227	-0.146905	-0.33619	0.304378	-0.0352056	-0.251658	0.0726306	0.183598	0.225039	-0.147828	-0.499245	0.276977	-0.0825506	-0.0355797	0.107003	-0.503847	-0.638769	0.148467	-0.0628894	-0.0376194	lightgreen|0.5964
LRRC47|NP_065761.1	M18	lightgreen	0.354431	-0.0546787	0.0195324	0.433479	0.357847	0.585547	0.0744528	0.168953	0.181094	-0.0509048	0.287349	-0.336129	-0.163156	-0.187689	-0.251848	0.23948	-0.0397424	-0.0988656	-0.400387	-0.0166765	-0.174373	-0.113386	-0.229725	-0.253795	-0.401392	-0.202922	-0.190742	-0.0917948	lightgreen|0.5855
LANCL2|NP_061167.1	M18	lightgreen	0.484039	0.115106	-0.23677	-0.0876837	0.0795894	0.560472	0.133185	0.0484495	0.180687	-0.270286	-0.413703	0.452297	0.108466	-0.257625	0.0563019	0.026543	0.233516	-0.154832	-0.493628	0.192514	0.0236138	-0.078933	0.0738344	-0.196608	-0.36164	0.142938	-0.215335	0.0604884	lightgreen|0.5605
CLDND1|NP_001035289.1	M18	lightgreen	0.107733	-0.0607336	-0.0187557	0.572029	0.386603	0.546278	0.341609	0.258392	0.45613	0.0937475	0.332929	-0.406622	-0.203001	-0.17173	-0.0501725	0.309808	0.143645	-0.0316284	-0.270302	-0.0899849	-0.0313845	-0.219808	-0.351075	-0.104361	-0.389562	-0.252835	0.0720582	-0.0630514	lightgreen|0.5463
RPL35|NP_009140.1	M18	lightgreen	-0.00727803	-0.337205	0.327635	-0.00229435	0.313391	0.516869	0.0677317	0.383884	0.144294	-0.0652825	-0.392751	-0.0588266	-0.57162	-0.469267	-0.374625	-0.23222	-0.224687	-0.306206	-0.423298	0.224775	-0.34918	-0.320173	-0.245669	6.08e-05	-0.185671	0.415916	0.296039	0.00489038	lightgreen|0.5169
ATP6V1F|NP_001185838.1	M18	lightgreen	0.0986321	-0.0386857	-0.16693	0.281088	0.386708	0.492193	0.0693689	0.212707	0.418685	-0.101876	0.16937	-0.0716742	-0.199035	-0.263563	-0.0277841	0.142885	0.13315	0.0964086	-0.245692	-0.0703086	-0.000796609	-0.229225	-0.190816	-0.16681	-0.462497	-0.277916	-0.0473165	0.150996	lightgreen|0.4922
ANLN|NP_061155.2	M18	lightgreen	0.0289393	-0.163197	-0.100592	-0.411351	-0.0282681	0.478499	-0.0935576	-0.0850574	-0.00366508	0.150159	-0.118642	0.447918	-0.24824	-0.131703	-0.138206	-0.0434181	0.275625	0.311581	0.330392	0.316087	0.145476	0.0767374	0.0756672	-0.0366958	-0.159626	0.111139	0.00879383	0.670551	lightgreen|0.4785
RALA|NP_005393.2	M18	lightgreen	0.377584	0.266626	-0.0897221	0.366423	0.434881	0.472689	-0.0158129	0.167553	0.444162	-0.0810497	0.181874	-0.103085	0.0207028	-0.138663	0.0733532	0.0549496	0.145817	-0.0870004	-0.437976	-0.174619	-0.24322	-0.236393	-0.165463	-0.227132	-0.397926	-0.397624	-0.337413	-0.021286	lightgreen|0.4727
CADM1|NP_055148.3	M18	lightgreen	0.252663	0.168434	-0.114938	-0.0710112	0.312207	0.466148	-0.0443118	0.216157	0.206068	-0.442877	-0.583407	0.32015	0.00488851	-0.432882	0.0570864	-0.213766	-0.0642381	-0.324436	-0.725754	-0.117556	-0.312936	-0.331142	-0.0602035	-0.230003	-0.457668	0.157922	-0.240255	-0.0601824	lightgreen|0.4661
PRKCE|NP_005391.1	M18	lightgreen	0.362414	0.0109717	-0.353202	-0.0572642	0.114023	0.428233	0.0602072	-0.0624791	0.0704264	-0.0610274	-0.0561526	0.140334	0.0148215	-0.103487	0.0697194	0.193231	0.203451	0.0637424	-0.241878	0.0804573	-0.106344	0.0681478	0.0902748	-0.514318	-0.562048	-0.00951579	-0.138437	0.0989238	lightgreen|0.4282
ATL3|NP_056274.3	M16	lightcyan	0.576814	-0.0103835	-0.60217	0.141883	-0.514243	-0.114747	0.39658	-0.309285	-0.0488273	0.39594	0.54003	-0.101591	0.63207	0.746084	0.350495	0.917953	0.595872	0.325582	0.229666	0.293683	0.616002	0.624954	0.345102	-0.326314	0.0169952	-0.230701	-0.117103	-0.476529	lightcyan|0.918
PON2|NP_000296.2	M16	lightcyan	0.279075	-0.0380779	-0.599265	0.0510352	-0.424518	0.0344083	0.652279	-0.00601752	0.2498	0.461834	0.350706	0.0356709	0.326958	0.519794	0.415154	0.913637	0.712138	0.356889	0.22752	0.330314	0.704031	0.367039	0.243052	-0.183798	-0.188324	-0.17714	0.170558	-0.317659	lightcyan|0.9136
RAB31|NP_006859.2	M16	lightcyan	0.403741	-0.0461278	-0.588699	0.0564967	-0.456582	0.00521584	0.513768	-0.189951	0.0388715	0.330715	0.410556	-0.0341677	0.502716	0.530937	0.504422	0.905642	0.653189	0.226905	0.0632804	0.324102	0.482893	0.441262	0.334808	-0.242185	-0.23862	-0.282344	-0.0117365	-0.359414	lightcyan|0.9056
EFR3B|NP_055786.1	M16	lightcyan	0.501435	-0.0891085	-0.577149	0.0732894	-0.470669	-0.0457083	0.385051	-0.352484	-0.108595	0.390131	0.462284	-0.0850801	0.528279	0.661946	0.328683	0.886268	0.589999	0.321746	0.241458	0.268783	0.560516	0.603108	0.292234	-0.405634	-0.0574504	-0.140934	-0.011172	-0.307173	lightcyan|0.8863
HSD17B12|NP_057226.1	M16	lightcyan	0.193693	-0.310568	-0.552283	-0.0451992	-0.626161	-0.274159	0.490651	-0.212984	-0.0794245	0.411846	0.407553	-0.0699993	0.369713	0.632492	0.336482	0.874308	0.531642	0.42964	0.367565	0.472135	0.718474	0.615653	0.407058	-0.140985	0.0360255	-0.0588979	0.352198	-0.398782	lightcyan|0.8743
SAR1B|NP_001028675.1	M16	lightcyan	0.265416	-0.11361	-0.4469	-0.0862834	-0.521072	-0.202252	0.50183	-0.0332178	-0.0311609	0.521943	0.361523	-0.0956549	0.350952	0.655252	0.303572	0.856037	0.508077	0.215528	0.267572	0.329795	0.515389	0.421318	0.263484	-0.147417	0.0399665	-0.0499672	0.0225305	-0.504225	lightcyan|0.856
RAB5C|NP_001238968.1	M16	lightcyan	0.40481	-0.00844177	-0.673504	-0.163694	-0.577963	0.101169	0.417957	-0.192559	0.119946	0.478288	0.307054	0.250373	0.557854	0.62198	0.534211	0.853783	0.788397	0.477577	0.314387	0.36687	0.64695	0.518205	0.488703	-0.0898782	-0.171885	-0.298089	-0.0536819	-0.195035	lightcyan|0.8538
SAR1A|NP_064535.1	M16	lightcyan	0.368586	-0.106746	-0.481486	-0.0962003	-0.541489	-0.170931	0.426653	-0.155331	-0.0559471	0.493439	0.39378	-0.0427461	0.476665	0.707621	0.365796	0.836219	0.58262	0.219471	0.262556	0.377726	0.507951	0.478964	0.305226	-0.144105	0.100427	-0.102868	-0.0867734	-0.464109	lightcyan|0.8362
COMT|NP_009294.1	M16	lightcyan	0.368014	-0.13621	-0.602855	0.0184989	-0.277771	0.195254	0.635541	0.080039	0.298928	0.378163	0.1431	0.10768	0.198046	0.375824	0.246665	0.835426	0.646999	0.323781	0.113452	0.228291	0.665728	0.287278	0.121501	-0.237842	-0.226879	0.0468473	0.184641	-0.201335	lightcyan|0.8354
HNRNPA1|NP_112420.1	M16	lightcyan	0.498243	0.146993	-0.689049	0.0163518	-0.403051	-0.0169819	0.497159	-0.110967	0.332041	0.588736	0.415881	0.115019	0.542705	0.744881	0.501979	0.83441	0.83657	0.415425	0.348344	0.216793	0.644319	0.424344	0.277349	-0.238689	-0.0267419	-0.259143	-0.148255	-0.321987	lightcyan|0.8344
GOLT1B|NP_057156.1	M16	lightcyan	0.464069	-0.036275	-0.557245	-0.0235924	-0.520607	-0.16103	0.36669	-0.245541	-0.0365993	0.493815	0.485141	0.0269955	0.436367	0.729652	0.209204	0.83251	0.598445	0.445693	0.461804	0.335201	0.726887	0.608809	0.314974	-0.28471	0.113782	-0.110422	-0.022527	-0.26553	lightcyan|0.8325
HNRNPA1L2|NP_001011724.1	M16	lightcyan	0.500922	0.145283	-0.689223	0.00930364	-0.405485	-0.0192384	0.499498	-0.108197	0.331214	0.588207	0.408187	0.120697	0.537146	0.743139	0.497407	0.830842	0.834929	0.414133	0.346521	0.224502	0.645073	0.425732	0.280865	-0.240736	-0.0256765	-0.249604	-0.143687	-0.323393	lightcyan|0.8308
RAB5B|NP_001238965.1	M16	lightcyan	0.359232	-0.0130022	-0.649956	-0.143504	-0.535017	0.0974027	0.341827	-0.180737	0.0333838	0.300946	0.286161	0.219269	0.542977	0.510325	0.498339	0.828333	0.65509	0.416323	0.168619	0.340689	0.588214	0.480327	0.487891	-0.128904	-0.264647	-0.334237	-0.0773906	-0.229331	lightcyan|0.8283
RHEB|NP_005605.1	M16	lightcyan	0.438836	0.0459628	-0.63839	0.0321701	-0.271023	0.269819	0.668398	-0.00235081	0.370256	0.450309	0.106448	0.157976	0.411412	0.448116	0.497909	0.823725	0.813082	0.220662	0.0695094	0.0997907	0.531946	0.228447	0.109729	-0.226935	-0.255074	-0.0550062	-0.0139794	-0.191518	lightcyan|0.8237
VAPB|NP_004729.1	M16	lightcyan	0.369414	-0.0817262	-0.842771	-0.20625	-0.722653	-0.155647	0.177622	-0.52172	-0.182543	0.159154	0.355511	0.287829	0.77456	0.659512	0.575808	0.822133	0.644396	0.633056	0.326692	0.432629	0.771512	0.78858	0.713793	-0.268945	-0.163457	-0.343955	0.00874987	-0.235281	lightcyan|0.8221
MXRA7|NP_940932.2	M16	lightcyan	0.266261	-0.0245054	-0.606283	0.0210456	-0.313075	-0.0833054	0.61949	0.0952923	0.32629	0.363891	0.191626	0.0543915	0.353441	0.470115	0.459921	0.810714	0.640002	0.249144	0.0877607	0.0715542	0.580903	0.220108	0.160003	-0.0872647	-0.14111	-0.111369	0.0801267	-0.333737	lightcyan|0.8107
YIF1B|NP_001034761.1	M16	lightcyan	0.264621	-0.149451	-0.641215	-0.338938	-0.683495	0.0387705	0.412889	-0.260976	-0.131912	0.421907	0.211101	0.279468	0.42858	0.566603	0.400048	0.807882	0.672921	0.439824	0.390956	0.623102	0.665476	0.600909	0.51193	-0.24029	-0.150704	-0.0343232	0.0759204	-0.221888	lightcyan|0.8079
FXYD7|NP_071289.1	M16	lightcyan	0.0349927	-0.362686	-0.585799	-0.255975	-0.623201	-0.210733	0.371538	-0.282816	-0.12735	0.446877	0.334892	0.0379014	0.352541	0.600957	0.440627	0.782401	0.579916	0.494817	0.473777	0.464029	0.602459	0.585616	0.438127	-0.133878	-0.0375873	-0.070854	0.307879	-0.204145	lightcyan|0.7824
RTN3|NP_958831.1	M16	lightcyan	0.576256	0.0752361	-0.487516	0.0470197	-0.375051	0.0961503	0.579503	-0.0422694	0.156681	0.542973	0.235343	0.0433253	0.394793	0.624093	0.206692	0.781486	0.643743	0.157093	0.21808	0.279839	0.564778	0.377428	0.11037	-0.307537	0.0606365	0.104048	-0.138528	-0.419523	lightcyan|0.7815
GNA14|NP_004288.1	M16	lightcyan	0.362356	0.157919	-0.524591	0.237194	-0.276121	0.0258179	0.332923	-0.104052	0.2233	0.409366	0.515523	-0.164108	0.502772	0.595575	0.427468	0.7786	0.524921	0.356154	0.132426	0.0453736	0.431135	0.368995	0.250026	-0.278531	-0.207051	-0.456693	-0.0951327	-0.452954	lightcyan|0.7786
GNA11|NP_002058.2	M16	lightcyan	0.394726	0.192104	-0.519107	0.23919	-0.251353	0.0590546	0.356804	-0.0616094	0.25914	0.43131	0.493895	-0.151854	0.473155	0.579737	0.418102	0.771744	0.538188	0.327162	0.111616	0.042632	0.404194	0.338128	0.232634	-0.303295	-0.234857	-0.440807	-0.113796	-0.451854	lightcyan|0.7717
DHRS7B|NP_056325.2	M16	lightcyan	0.160014	-0.151501	-0.563389	0.119229	-0.242423	0.327276	0.61399	-0.051027	0.242852	0.209604	0.173504	0.0649333	0.187943	0.17471	0.347241	0.746251	0.601332	0.320742	0.0578124	0.283095	0.578887	0.261891	0.136953	-0.236639	-0.430174	-0.0899022	0.307943	-0.0775937	lightcyan|0.7463
PLSCR4|NP_065086.2	M16	lightcyan	0.589083	0.370964	-0.509667	0.365192	-0.0513983	0.185961	0.456118	-0.0272657	0.320696	0.253221	0.447439	-0.0751979	0.370524	0.385763	0.299643	0.745298	0.576473	0.13829	-0.0759783	-0.0186193	0.409096	0.194925	0.0284401	-0.512128	-0.342073	-0.370128	-0.236288	-0.260929	lightcyan|0.7453
CHP1|NP_009167.1	M16	lightcyan	0.37954	-0.102378	-0.64738	-0.190993	-0.639244	-0.256778	0.173532	-0.513532	-0.224026	0.324948	0.349021	0.200144	0.651499	0.735276	0.369205	0.74441	0.59452	0.56156	0.508135	0.225306	0.760651	0.733909	0.471069	-0.207071	0.149688	-0.133374	0.0018297	-0.068379	lightcyan|0.7444
RAB14|NP_057406.2	M16	lightcyan	0.33194	0.13557	-0.373946	0.145485	-0.241697	-0.00884325	0.312725	-0.0445386	0.179592	0.441263	0.527473	-0.126547	0.426583	0.544874	0.372122	0.734584	0.5311	0.2547	0.182518	-0.0756615	0.357418	0.241381	0.142678	0.00105497	-0.0710717	-0.480866	-0.25642	-0.192796	lightcyan|0.7346
RAB8B|NP_057614.1	M16	lightcyan	0.219033	-0.194174	-0.52816	-0.0854271	-0.475725	-0.178697	0.355788	-0.0581075	0.131166	0.440965	0.310185	-0.0735261	0.533644	0.663299	0.553944	0.725939	0.54707	0.259273	0.142928	0.28771	0.364868	0.378532	0.368219	0.0433693	0.0412406	-0.215167	-0.0280886	-0.600542	lightcyan|0.7259
NAP1L1|NP_004528.1	M16	lightcyan	0.193045	-0.112494	-0.308155	0.206385	-0.149706	0.058826	0.350103	0.041475	0.280586	0.464625	0.47644	-0.23753	0.330545	0.500034	0.294595	0.710716	0.481816	0.277521	0.187399	-0.131629	0.377627	0.16149	-0.0116712	0.185068	0.0522643	-0.353927	-0.104592	-0.209089	lightcyan|0.7107
NAP1L4|NP_005960.1	M16	lightcyan	0.166781	-0.13635	-0.348467	0.140126	-0.23043	-0.0108613	0.299834	-0.0553439	0.194176	0.418651	0.473291	-0.180788	0.393769	0.526481	0.32462	0.702566	0.479774	0.340537	0.241733	-0.0893187	0.430908	0.244144	0.0743097	0.196271	0.0783337	-0.361713	-0.0847784	-0.177677	lightcyan|0.7026
SYT5|NP_003171.2	M16	lightcyan	0.244564	-0.381657	-0.525829	-0.234066	-0.424825	0.15582	0.368813	-0.164163	-0.0137778	0.371438	0.0440825	0.153138	0.276691	0.391501	0.287679	0.686476	0.541017	0.379353	0.235841	0.232792	0.472493	0.422089	0.288506	-0.080685	-0.139174	0.0995101	0.198291	-0.0262995	lightcyan|0.6865
FAM82A2|NP_060615.1	M16	lightcyan	-0.0350784	-0.32754	-0.326238	-0.00720857	-0.333129	-0.225768	0.4594	0.0991794	-0.00328141	0.289649	0.296702	-0.211622	-0.0158525	0.29064	0.132429	0.675967	0.227446	0.25482	0.162233	0.254233	0.405163	0.280515	0.195769	-0.0778776	-0.162628	-0.0218506	0.401402	-0.324356	lightcyan|0.676
TOLLIP|NP_061882.2	M16	lightcyan	0.41264	0.259659	-0.437472	0.205228	0.0382183	0.113849	0.450834	0.192773	0.494129	0.440313	0.355882	-0.0718315	0.274607	0.419184	0.323428	0.675485	0.584063	0.155465	0.0338778	-0.30777	0.29965	-0.0179443	-0.10155	-0.127132	-0.182303	-0.341367	-0.326286	-0.148264	lightcyan|0.6755
LAMTOR3|NP_001230665.1	M16	lightcyan	0.424598	0.198369	-0.664395	-0.0393428	-0.33443	-0.0380691	0.361882	-0.0861949	0.13114	0.160297	0.0400237	0.14552	0.563168	0.431134	0.608057	0.642125	0.537073	0.0861312	-0.1601	0.14016	0.277298	0.286659	0.357829	-0.484544	-0.364827	-0.149264	-0.112541	-0.522865	lightcyan|0.6421
MGST1|NP_665734.1	M16	lightcyan	0.1151	-0.299239	-0.396582	-0.350816	-0.559041	0.046987	0.687827	0.117555	0.0346726	0.423342	-0.15076	0.25937	-0.0098206	0.249322	0.226778	0.638108	0.513825	0.189795	0.18655	0.618184	0.508571	0.320099	0.352115	-0.0463532	-0.193175	0.332168	0.476432	-0.216948	lightcyan|0.6381
TMED5|NP_057124.3	M16	lightcyan	0.342346	-0.0414857	-0.477978	-0.106377	-0.343355	0.244166	0.521962	-0.0120387	-0.0114192	0.200225	0.0508988	0.13973	0.121217	0.191886	0.165948	0.632612	0.431872	0.0918424	-0.0360567	0.568128	0.361304	0.30851	0.260104	-0.486388	-0.421578	0.134019	0.086232	-0.33203	lightcyan|0.6326
STX1B|NP_443106.1	M16	lightcyan	0.176613	-0.0527127	-0.547231	-0.512875	-0.628913	0.00644543	0.436823	-0.0532262	0.000800099	0.523174	-0.00279745	0.448405	0.267125	0.466744	0.363841	0.624835	0.651702	0.418057	0.47461	0.42993	0.557557	0.41472	0.475496	-0.00109859	-0.131192	0.0520406	0.0385123	-0.0159783	lightcyan|0.6248
CNTFR|NP_001193940.1	M16	lightcyan	0.37714	-0.0541277	-0.473077	-0.0167056	-0.32317	-0.0476367	0.118361	-0.247643	0.0636867	0.455647	0.471069	-0.125716	0.547971	0.683514	0.502911	0.608647	0.55568	0.239203	0.173993	0.253995	0.166483	0.403086	0.305211	-0.240355	0.00299186	-0.342274	-0.243351	-0.430042	lightcyan|0.6086
RTCA|NP_003720.1	M16	lightcyan	0.310624	0.0121806	-0.41297	-0.100836	-0.240115	0.243277	0.566087	0.119308	0.242373	0.530975	0.141394	0.145153	0.00138481	0.336904	0.0789027	0.607102	0.575635	0.241446	0.297097	0.365582	0.475688	0.21443	0.0666757	-0.29562	-0.172349	0.141582	0.0451695	-0.112731	lightcyan|0.6071
GNAQ|NP_002063.2	M16	lightcyan	0.341622	0.231875	-0.429653	0.330012	-0.136065	0.082013	0.305122	-0.0028199	0.278451	0.218651	0.437672	-0.166853	0.347862	0.353033	0.343816	0.588015	0.377131	0.231729	-0.0590251	0.0913033	0.276409	0.243564	0.221253	-0.323663	-0.348877	-0.455109	-0.0471771	-0.447717	lightcyan|0.588
PTPMT1|NP_783859.1	M16	lightcyan	-0.0106585	-0.142544	-0.362709	0.148966	-0.262479	-0.00193848	0.506276	-0.0269189	0.0644938	0.0785245	0.240264	-0.173421	0.14066	0.0774599	0.425438	0.568767	0.301426	0.0973444	-0.129785	0.268504	0.161227	0.199721	0.270462	-0.134981	-0.501198	-0.240111	0.346035	-0.28845	lightcyan|0.5688
ND6|YP_003024037.1	M16	lightcyan	0.152193	-0.135271	-0.613717	-0.386008	-0.548689	0.115414	0.377588	-0.314191	-0.139401	0.211766	0.0107737	0.382596	0.259028	0.275395	0.400036	0.563294	0.590717	0.363821	0.261539	0.664616	0.481276	0.496611	0.496061	-0.41065	-0.379743	0.0696289	0.23913	-0.0296344	lightcyan|0.5633
ARL8B|NP_060654.1	M16	lightcyan	0.465787	0.319759	-0.320167	0.315725	-0.0393881	0.0838255	0.13165	-0.117858	0.0266438	0.0326348	0.377185	-0.101505	0.218624	0.228157	-0.0238554	0.475329	0.16001	0.199021	-0.0486605	-0.04089	0.328225	0.275516	0.103253	-0.563366	-0.304496	-0.282208	-0.131265	-0.19536	lightcyan|0.4753
SSBP1|NP_003134.1	M16	lightcyan	0.079208	0.0339596	-0.409475	-0.0306636	-0.113418	0.195717	0.531448	-0.0424121	0.130359	-0.0424245	-0.232452	0.198491	0.189969	-0.0319215	0.368384	0.433246	0.393949	-0.0108445	-0.218406	-0.0317577	0.283713	0.0160077	0.0176641	-0.231243	-0.416055	0.114256	0.177437	-0.00642151	lightcyan|0.4332
GNG7|NP_443079.1	M16	lightcyan	0.154921	-0.02309	-0.0967082	0.393565	-0.00766074	-0.102639	0.311021	0.139586	0.181169	0.155565	0.440955	-0.512149	0.177852	0.222124	0.270392	0.422161	0.101795	-0.160106	-0.29135	0.0524618	-0.159875	0.0107507	0.0273867	-0.0291819	-0.168859	-0.349364	-0.0547459	-0.632915	lightcyan|0.4222
SLC25A25|NP_001006643.1	M16	lightcyan	0.439847	0.0417791	-0.236583	0.181735	-0.0580336	0.0531153	0.107314	0.0952905	0.209743	0.223542	0.34645	-0.119087	0.190607	0.308556	0.0324334	0.395573	0.208017	0.199621	-0.0148232	-0.026945	0.175146	0.186577	0.137587	-0.00148142	-0.0452972	-0.289342	-0.204156	-0.222641	lightcyan|0.3956
PBXIP1|NP_065385.2	M16	lightcyan	-0.164911	0.192153	-0.244091	0.0905178	-0.136503	-0.518426	0.250742	0.0722267	0.0570795	-0.0266675	0.343455	-0.142275	0.0639794	0.119443	0.274836	0.314722	0.0646576	0.107678	0.0394189	-0.066331	0.180764	0.0429201	0.174011	-0.0724372	-0.233365	-0.372359	0.100388	-0.203423	lightcyan|0.3147
MTDH|NP_848927.2	M17	grey60	0.19761	-0.331729	-0.568991	-0.343846	-0.885906	-0.285663	0.152581	-0.58538	-0.422053	0.193855	0.224852	0.349796	0.568105	0.616623	0.266234	0.640147	0.488501	0.651754	0.60723	0.647387	0.936256	0.891876	0.68544	-0.00173068	0.242635	0.0158766	0.305789	-0.0531373	grey60|0.9363
TMEM38A|NP_076979.1	M17	grey60	-0.0292905	-0.497329	-0.638854	-0.491603	-0.669984	0.00116047	0.262289	-0.329419	-0.121483	0.0854685	-0.138364	0.588904	0.297265	0.252581	0.291117	0.503885	0.549235	0.704939	0.502302	0.504048	0.912067	0.59517	0.545353	0.200739	-0.00621225	0.163064	0.483708	0.302004	grey60|0.9121
MAP2|NP_002365.3	M17	grey60	0.0395365	-0.312989	-0.516203	-0.292395	-0.726652	-0.355495	0.0751408	-0.478945	-0.260614	0.214879	0.32218	0.292591	0.429919	0.56152	0.234622	0.542848	0.443169	0.754769	0.700096	0.451984	0.90982	0.75896	0.586876	0.12739	0.257858	-0.129779	0.332725	0.109343	grey60|0.9098
CLGN|NP_004353.1	M17	grey60	-0.0863992	-0.384487	-0.750161	-0.507368	-0.744808	-0.240372	0.0972084	-0.460253	-0.193571	-0.0127059	0.00594509	0.561309	0.492998	0.376611	0.476268	0.484231	0.519782	0.766268	0.505548	0.543519	0.886777	0.689442	0.717314	0.0943074	-0.0173243	-0.0617753	0.388944	0.121	grey60|0.8868
ARL1|NP_001168.1	M17	grey60	0.528718	-0.059217	-0.666191	-0.262216	-0.593857	0.21572	0.442512	-0.242533	0.0430737	0.338862	0.011553	0.502677	0.447054	0.496891	0.269798	0.743004	0.752174	0.484634	0.315307	0.509478	0.873194	0.584375	0.441966	-0.214014	-0.0636588	0.0959047	0.0952072	-0.0428403	grey60|0.8732
CISD2|NP_001008389.1	M17	grey60	0.372947	-0.20437	-0.687661	-0.252814	-0.67882	0.0414689	0.500107	-0.19881	0.0506168	0.445331	0.174697	0.336861	0.418219	0.582843	0.361081	0.848401	0.743644	0.566529	0.402784	0.560151	0.860134	0.632033	0.527449	-0.0994459	-0.0727556	-0.0150559	0.240291	-0.168761	grey60|0.8601
HNRNPH1|NP_005511.1	M17	grey60	0.241193	-0.116354	-0.597233	-0.309884	-0.652418	-0.0319489	0.34518	-0.260672	0.0449005	0.622635	0.244771	0.349758	0.479752	0.718754	0.361295	0.735922	0.769151	0.66596	0.730478	0.285764	0.860046	0.594554	0.408477	0.0925584	0.183559	-0.0733222	0.0569443	0.0674208	grey60|0.86
DHRS7|NP_057113.1	M17	grey60	0.226795	-0.205718	-0.590276	-0.488889	-0.714553	-0.113939	0.416355	-0.219296	-0.110006	0.387658	-0.0610585	0.521085	0.345449	0.511152	0.239703	0.622813	0.630515	0.515689	0.567696	0.466031	0.854152	0.579853	0.463545	0.0330209	0.134402	0.253361	0.193371	0.0549343	grey60|0.8542
TMEM205|NP_940938.1	M17	grey60	0.368084	-0.0949114	-0.709021	-0.191923	-0.722682	-0.155469	0.216017	-0.530684	-0.0781672	0.430039	0.357413	0.3007	0.736499	0.793993	0.497309	0.724396	0.753472	0.677953	0.628808	0.37634	0.848443	0.781379	0.57186	-0.0739516	0.18161	-0.203168	0.0358994	-0.0803734	grey60|0.8484
MLEC|NP_055545.1	M17	grey60	0.103887	-0.337844	-0.721627	-0.44657	-0.744281	-0.203246	0.110943	-0.447873	-0.216647	-0.0847239	-0.035915	0.56062	0.475993	0.336468	0.403772	0.48053	0.47099	0.671286	0.328549	0.658624	0.845234	0.727275	0.775707	-0.0427531	-0.076912	-0.017311	0.419774	-0.00265654	grey60|0.8452
ABHD12|NP_056415.1	M17	grey60	0.216399	-0.378722	-0.520693	-0.469506	-0.648493	0.0123882	0.177254	-0.255263	-0.179885	0.263418	-0.105526	0.484768	0.371582	0.460766	0.127367	0.568067	0.481232	0.585196	0.478577	0.358137	0.842483	0.595849	0.446527	0.137514	0.197588	0.227829	0.195962	0.0964521	grey60|0.8425
KIAA1715|NP_085153.1	M17	grey60	0.232807	-0.246912	-0.794561	-0.48706	-0.694965	0.126141	0.396394	-0.25766	-0.0315166	0.260799	-0.00967068	0.57962	0.420576	0.420886	0.465323	0.758111	0.773174	0.588992	0.372597	0.632487	0.842547	0.587401	0.597943	-0.128709	-0.23235	0.0116672	0.200921	0.0323606	grey60|0.8425
PCBP2|NP_001122386.1	M17	grey60	0.129834	-0.0929667	-0.465318	-0.145398	-0.620137	-0.336429	0.211483	-0.271852	-0.0755791	0.39375	0.425245	0.144376	0.419614	0.666396	0.237467	0.635122	0.484689	0.604382	0.630541	0.352022	0.837688	0.606873	0.431767	0.0549509	0.265943	-0.194021	0.142393	-0.144194	grey60|0.8377
HNRNPH2|NP_062543.1	M17	grey60	0.156099	-0.164589	-0.713204	-0.317291	-0.51164	-0.0555008	0.0856834	-0.386097	-0.00522759	0.0483414	0.150374	0.535234	0.393513	0.323476	0.327646	0.470482	0.568753	0.782337	0.493997	0.341079	0.834742	0.59192	0.567022	-0.0104092	-0.115452	-0.206492	0.19737	0.332782	grey60|0.8347
COX5A|NP_004246.2	M17	grey60	0.0568053	-0.419458	-0.565533	-0.439312	-0.739283	-0.019195	0.14418	-0.446996	-0.124232	0.455338	0.22796	0.395174	0.42608	0.605698	0.368602	0.590374	0.685734	0.783452	0.752597	0.601803	0.834378	0.722326	0.585471	0.166077	0.185228	-0.0808393	0.299627	0.168671	grey60|0.8344
DDOST|NP_005207.2	M17	grey60	0.36957	-0.0950099	-0.607105	-0.32081	-0.643682	-0.110443	0.113229	-0.362264	-0.0367418	0.477111	0.304304	0.381791	0.556374	0.731692	0.302157	0.640821	0.666119	0.729771	0.671949	0.290173	0.818659	0.687276	0.533502	0.069123	0.219357	-0.187856	-0.0481459	0.0761534	grey60|0.8187
DDRGK1|NP_076424.1	M17	grey60	0.649798	-0.135858	-0.579557	-0.0241595	-0.588828	0.157651	0.393867	-0.396594	-0.0722819	0.30445	0.204734	0.259137	0.557129	0.575833	0.180906	0.747362	0.647712	0.42785	0.297976	0.495102	0.815716	0.70285	0.401466	-0.201726	0.0985102	0.0704809	0.0541143	-0.165893	grey60|0.8157
PTPLAD1|NP_057479.2	M17	grey60	0.109746	-0.429496	-0.441112	-0.243622	-0.56867	-0.136878	0.476157	-0.0894758	-0.0782408	0.0445501	-0.0882542	0.341089	0.0889742	0.167058	0.0667624	0.52516	0.363068	0.393123	0.241314	0.562402	0.814364	0.472155	0.400154	0.126251	0.0297232	0.2873	0.558727	-0.0114651	grey60|0.8144
ATP5D|NP_001678.1	M17	grey60	0.0230281	-0.3376	-0.475769	-0.211568	-0.612331	-0.0149275	0.302082	-0.352508	-0.0281244	0.427068	0.237457	0.237158	0.402369	0.534706	0.389011	0.651649	0.661803	0.625319	0.608585	0.364973	0.811845	0.567238	0.382914	0.19311	0.159506	-0.103282	0.34936	0.137348	grey60|0.8118
GRIPAP1|NP_064522.3	M17	grey60	0.21872	-0.307242	-0.54327	-0.200558	-0.513564	-0.22745	0.294714	-0.117265	0.0521573	0.192445	0.122242	0.272087	0.301099	0.44703	0.16642	0.560495	0.448091	0.522713	0.359728	0.382648	0.80993	0.503898	0.397033	0.114543	0.187133	0.0636745	0.260685	-0.133722	grey60|0.8099
HNRNPA0|NP_006796.1	M17	grey60	0.0581956	-0.546138	-0.446973	-0.410629	-0.788854	-0.156686	0.206955	-0.336245	-0.213459	0.298163	0.00601222	0.328818	0.434718	0.547137	0.281047	0.539161	0.480994	0.54845	0.504142	0.633167	0.802399	0.678043	0.558872	0.288105	0.35008	0.174773	0.405188	-0.145689	grey60|0.8024
PCBP2|NP_001122384.1	M17	grey60	0.283435	-0.115425	-0.774627	-0.242154	-0.678574	-0.0802501	0.10679	-0.539057	-0.264624	-0.025497	0.31682	0.363099	0.655501	0.471844	0.460424	0.723582	0.55266	0.615518	0.27517	0.546747	0.790322	0.746188	0.694115	-0.26385	-0.218453	-0.331436	0.040199	-0.0904683	grey60|0.7903
PGRMC2|NP_006311.2	M17	grey60	0.160579	-0.390143	-0.575806	-0.324079	-0.517942	0.129472	0.451637	-0.146931	0.0102451	0.252458	0.0319138	0.374783	0.120605	0.28592	0.182591	0.645401	0.60525	0.494091	0.350894	0.657844	0.787637	0.484437	0.367641	-0.104675	-0.110868	0.181578	0.39415	0.0596079	grey60|0.7876
CAD|NP_004332.2	M17	grey60	0.139646	-0.35873	-0.313079	-0.261126	-0.622565	-0.265964	-0.154755	-0.506259	-0.321663	0.290459	0.277839	0.212702	0.443012	0.629739	0.00567699	0.346013	0.288712	0.689303	0.759471	0.31235	0.767334	0.738152	0.435821	0.219719	0.56787	0.0155213	0.134295	0.105454	grey60|0.7673
NCEH1|NP_001139748.1	M17	grey60	0.176388	-0.11517	-0.735911	-0.416008	-0.557665	-0.116488	0.404945	-0.189615	0.0391025	0.132843	-0.202226	0.577697	0.372329	0.332005	0.406714	0.520727	0.608967	0.475416	0.321454	0.332855	0.766812	0.458714	0.459918	-0.126421	-0.113915	0.198662	0.255236	0.0394623	grey60|0.7668
MBOAT7|NP_077274.3	M17	grey60	0.260943	-0.139579	-0.799509	-0.560695	-0.668582	0.00347598	0.109942	-0.439288	-0.180681	-0.0861405	-0.293341	0.767545	0.532912	0.289829	0.427633	0.402223	0.546222	0.567681	0.243498	0.551729	0.747041	0.646186	0.715207	-0.255478	-0.195817	0.14621	0.202469	0.0639798	grey60|0.747
AIMP2|NP_006294.2	M17	grey60	0.547289	0.112475	-0.565682	-0.0494626	-0.583834	-0.106347	0.113586	-0.564767	-0.261997	0.128106	0.262947	0.267624	0.774811	0.637849	0.268536	0.60407	0.49912	0.40054	0.336275	0.239517	0.737338	0.701179	0.421375	-0.254915	0.188439	-0.105028	-0.21899	-0.15582	grey60|0.7373
NDUFA8|NP_055037.1	M17	grey60	-0.240684	-0.575527	-0.457024	-0.367928	-0.686087	-0.298443	0.118053	-0.360179	-0.198061	0.214437	0.142879	0.223634	0.299932	0.415283	0.352468	0.484448	0.384871	0.711847	0.589691	0.414933	0.734985	0.622366	0.567415	0.313602	0.149938	-0.0604003	0.594042	0.10051	grey60|0.735
MCM7|NP_877577.1	M17	grey60	0.058209	-0.342417	-0.298682	-0.238724	-0.530595	-0.237486	-0.250368	-0.516387	-0.278726	0.205483	0.310079	0.205308	0.443666	0.576718	0.0813013	0.317501	0.298583	0.682139	0.683199	0.275077	0.732725	0.655115	0.39222	0.197199	0.519149	-0.117555	0.128959	0.157088	grey60|0.7327
PRKCA|NP_002728.1	M17	grey60	-0.177575	-0.372207	-0.519136	-0.529922	-0.564719	-0.190461	0.12924	-0.286113	-0.196694	-0.0638102	-0.312198	0.575181	0.270634	0.155338	0.286922	0.296262	0.336327	0.538966	0.389852	0.234516	0.730994	0.435496	0.452107	0.176347	0.0324289	0.230223	0.442999	0.289943	grey60|0.731
TMEM109|NP_076997.1	M17	grey60	0.13301	-0.562909	-0.247418	-0.241827	-0.392744	0.164026	0.00236144	-0.187971	-0.18433	0.0724093	0.0337465	0.261405	0.0589656	0.192385	-0.220116	0.376313	0.197703	0.537158	0.352369	0.440389	0.721202	0.482903	0.268441	0.18989	0.217697	0.186751	0.314498	0.188229	grey60|0.7212
ATP1B2|NP_001669.3	M17	grey60	-0.0141604	-0.395576	-0.319781	-0.569519	-0.723371	-0.184872	0.395097	-0.0852285	-0.0795006	0.33443	-0.256082	0.546	0.100093	0.29908	0.185274	0.321336	0.474786	0.404281	0.520691	0.653153	0.695619	0.452656	0.502931	0.384732	0.260945	0.377607	0.502541	0.0960315	grey60|0.6956
PTK2B|NP_775267.1	M17	grey60	0.413663	-0.160748	-0.451304	-0.421721	-0.46689	0.243602	0.235661	-0.286053	-0.140406	0.200268	-0.16515	0.583677	0.227565	0.275086	0.065319	0.459029	0.572515	0.369103	0.321405	0.452824	0.685322	0.470697	0.308501	-0.177559	0.0186649	0.287777	0.0962149	0.309228	grey60|0.6853
RDH11|NP_057110.3	M17	grey60	0.141291	-0.320798	-0.320368	-0.205413	-0.463288	0.0743691	0.712158	0.195009	0.161872	0.435278	-0.0592457	0.208671	-0.104509	0.24392	0.0170199	0.618454	0.47398	0.263948	0.259611	0.573939	0.683309	0.28391	0.212215	0.0873524	-0.0126284	0.345737	0.491905	-0.173732	grey60|0.6833
PGRMC1|NP_006658.1	M17	grey60	0.265973	-0.265249	-0.799923	-0.541303	-0.661982	-0.0577808	0.0954416	-0.379475	-0.19219	0.02601	-0.181169	0.589082	0.544343	0.408027	0.39743	0.502354	0.495176	0.581734	0.26224	0.46961	0.676691	0.662503	0.68615	-0.198749	-0.135476	0.129099	0.137426	-0.0825667	grey60|0.6767
SSR4|NP_006271.1	M17	grey60	-0.1074	-0.478246	-0.350213	-0.316576	-0.463646	-0.0280905	-0.0147879	-0.397505	-0.356025	-0.0434558	0.0118397	0.259403	0.241055	0.21833	0.0595349	0.372356	0.217344	0.480284	0.373244	0.352458	0.668731	0.494198	0.289908	0.0386527	0.139674	0.140475	0.302954	0.180449	grey60|0.6687
CYB5B|NP_085056.2	M17	grey60	-0.0724932	-0.117249	-0.672384	-0.455805	-0.552353	-0.186398	0.431045	-0.108032	-0.024379	-0.130386	-0.379897	0.595932	0.239148	0.0607721	0.462855	0.39032	0.419967	0.34473	0.0798682	0.434403	0.643848	0.345815	0.538407	-0.143303	-0.345992	0.21245	0.482057	-0.0486592	grey60|0.6438
NCSTN|NP_056146.1	M17	grey60	-0.206378	-0.438663	-0.318295	-0.258899	-0.31684	0.163665	0.0203479	-0.25753	-0.129419	-0.288853	-0.266234	0.447441	0.0732367	-0.151469	0.0526077	0.105689	0.149183	0.470305	0.176639	0.365822	0.624447	0.319139	0.30242	0.158097	-0.0744912	0.172687	0.520311	0.337704	grey60|0.6244
TMED7|NP_861974.1	M17	grey60	-0.343826	-0.280948	-0.453965	-0.320123	-0.493382	-0.366038	0.0594097	-0.411164	-0.272843	-0.326918	-0.0737658	0.410687	0.205573	-0.0395533	0.336786	0.153609	0.17265	0.513257	0.312361	0.290769	0.586924	0.433789	0.523259	0.115153	-0.155625	-0.0553168	0.55568	0.351932	grey60|0.5869
CANX|NP_001737.1	M17	grey60	0.416871	-0.201496	0.139341	0.441531	-0.100516	0.110483	0.244101	-0.149181	-0.213728	0.000336318	0.193176	-0.265043	-0.0785282	0.0692848	-0.522501	0.298361	-0.0951706	-0.00435764	0.00862465	0.21478	0.434111	0.338577	-0.13154	-0.196827	0.245933	0.315905	0.337224	-0.111947	grey60|0.4341
PURB|NP_150093.1	M17	grey60	0.252134	-0.158317	0.0808123	0.323179	0.000770664	-0.120921	0.0635038	-0.0877408	-0.028036	0.0032504	0.308757	-0.179593	-0.0383072	0.121492	-0.357338	0.17849	-0.0219849	0.133257	0.157661	-0.0254864	0.401972	0.189688	-0.140902	0.10379	0.370969	0.0366531	0.134878	0.105265	grey60|0.402
VAT1|NP_006364.2	M17	grey60	0.116231	-0.129673	-0.118863	0.112601	-0.0947855	-0.0570591	0.104109	0.044173	0.067712	0.0229378	0.340775	-0.0360226	0.0176674	0.102304	-0.0893144	0.336554	0.121173	0.260102	0.123134	0.0506134	0.389879	0.137454	0.0693562	0.232084	0.0500018	-0.251516	0.0164553	0.0898972	grey60|0.3899
PURA|NP_005850.1	M17	grey60	-0.177453	-0.357124	0.0672142	0.109936	0.000336506	0.198551	-0.0196029	-0.0781274	-0.182061	-0.354488	0.0537209	0.0106599	-0.310875	-0.3605	-0.39234	0.00539621	-0.20728	0.20667	0.0168348	0.33188	0.345517	0.128935	-0.00478269	0.0300306	-0.105206	0.0920409	0.435872	0.280401	grey60|0.3455
CTNNB1|NP_001091679.1	NA	grey	-0.307951	-0.484603	-0.0136117	-0.29516	0.0148855	0.282656	-0.301472	-0.167547	-0.108929	-0.174074	-0.0165069	0.308098	-0.29611	-0.305855	-0.224698	-0.158201	0.0041229	0.481268	0.346482	0.172043	0.248998	0.0915998	0.0733543	0.327696	-0.0373428	-0.0317233	0.260387	0.838334	grey|0.8383
CTNNB1|NP_001091680.1	NA	grey	-0.337876	-0.483942	-0.00599605	-0.278355	0.0598783	0.278169	-0.323893	-0.119903	-0.0532694	-0.178238	0.00423909	0.280753	-0.332196	-0.332266	-0.217215	-0.18752	-0.0204236	0.495901	0.323826	0.147167	0.198275	0.0526829	0.0762797	0.35315	-0.076015	-0.0871073	0.267182	0.828643	grey|0.8286
PSAP|NP_002769.1	NA	grey	-0.0980029	-0.243696	-0.0813789	-0.411378	-0.122207	0.0581177	-0.31514	-0.362636	-0.181872	-0.0345934	-0.119152	0.452064	-0.107561	-0.0879203	-0.0771515	-0.267534	0.133039	0.421973	0.481284	0.178778	0.177874	0.238178	0.203815	0.098278	0.101315	0.105975	0.187991	0.807445	grey|0.8074
CASC4|NP_816929.1	NA	grey	-0.10526	-0.195481	0.0417863	-0.326615	0.0387856	0.320216	-0.108092	0.0548475	-0.0177001	-0.0483733	-0.129698	0.384705	-0.322312	-0.295205	-0.267282	-0.126945	0.0522969	0.238896	0.239562	0.0995641	0.147805	-0.0662224	-0.0089842	0.30483	-0.0683184	0.0629903	-0.0140675	0.720798	grey|0.7208
DLGAP1|NP_004737.2	NA	grey	-0.309096	-0.0419318	-0.221211	-0.46299	-0.100717	0.129303	-0.459675	-0.434144	-0.366205	-0.505945	-0.275189	0.568284	0.100602	-0.329653	0.0946747	-0.301173	-0.0583285	0.341407	0.158922	0.0440224	0.1092	0.141449	0.286706	-0.0487774	-0.285066	-0.0759038	-0.0337934	0.703641	grey|0.7036
AKAP5|NP_004848.3	NA	grey	-0.451064	-0.180524	0.0659632	-0.403707	0.20832	0.340435	-0.275123	0.0487472	0.00376916	-0.40117	-0.530619	0.456733	-0.236321	-0.5632	0.0273084	-0.429011	-0.101794	0.0286547	-0.12605	-0.133611	-0.154134	-0.336066	-0.0747977	0.310071	-0.231767	0.0907463	0.0526512	0.676727	grey|0.6767
CA4|NP_000708.1	NA	grey	-0.328196	-0.250697	-0.164227	-0.332894	0.0454629	0.190448	-0.464712	-0.3733	-0.120816	-0.337253	-0.191437	0.347239	0.144432	-0.244435	0.323059	-0.288934	0.0757471	0.276824	0.0549453	-0.0970372	-0.125254	0.0130006	0.174314	0.169196	-0.194518	-0.21499	0.0180268	0.657771	grey|0.6578
ACOT1|NP_001032238.1	NA	grey	-0.0777509	-0.170807	0.265409	0.159448	0.269647	0.2696	-0.150608	0.0699311	0.131245	0.0519933	0.144514	-0.051352	-0.390853	-0.248211	-0.435006	-0.207147	-0.126837	0.24689	0.273022	-0.225818	0.0395467	-0.0986594	-0.231333	0.349365	0.0947375	-0.0640817	0.11353	0.64991	grey|0.6499
SYNJ1|NP_001153774.1	NA	grey	-0.371574	-0.196281	0.360562	-0.263631	0.212739	0.0492951	-0.443004	-0.0418216	-0.350164	-0.386584	-0.240393	0.136403	-0.487068	-0.548841	-0.4338	-0.569577	-0.485088	-0.0463307	0.039397	-0.0365074	-0.322801	-0.173877	-0.0968318	0.123967	-0.0537151	0.187778	0.0861439	0.640702	grey|0.6407
CUL5|NP_003469.2	NA	grey	-0.530631	-0.0311844	0.217681	-0.495535	0.0671679	0.11967	-0.122877	0.140027	0.0581786	-0.0188248	-0.546977	0.478815	-0.382844	-0.388625	-0.0323456	-0.555051	-0.0454391	0.0177206	0.253284	0.00532185	-0.134521	-0.312761	-0.0694479	0.362826	0.032496	0.294051	0.181102	0.62075	grey|0.6208
NTRK2|NP_001018074.1	NA	grey	0.181437	-0.31907	-0.00617001	-0.160998	-0.0412796	0.257064	-0.0878644	-0.0991305	0.000214991	0.274686	0.147636	0.174416	-0.244963	0.0615659	-0.359871	0.0457736	0.180664	0.416962	0.485559	0.187221	0.279152	0.227069	0.0172187	0.145203	0.178855	0.111172	0.0968416	0.593721	grey|0.5937
STX1A|NP_004594.1	NA	grey	-0.312954	-0.0328656	0.0122484	-0.359229	0.118166	0.356616	0.0675629	0.257235	0.159861	-0.16689	-0.339688	0.469835	-0.425791	-0.520904	-0.0753545	-0.230919	0.0562677	0.0633211	0.013051	0.161455	0.00336952	-0.308905	-0.0204412	0.247624	-0.358458	0.0680331	0.0669851	0.590478	grey|0.5905
ATP2C1|NP_001186114.1	NA	grey	-0.224826	-0.158584	0.183846	0.0103418	0.200788	0.108303	-0.206339	-0.0669737	0.058336	0.229093	0.177037	-0.108714	-0.179324	-0.00132728	-0.19084	-0.170862	-0.0366854	0.24766	0.431886	-0.404969	-0.0539838	-0.0897077	-0.250959	0.340242	0.221992	-0.0917927	-0.0660182	0.575873	grey|0.5759
AUH|NP_001689.1	NA	grey	-0.528593	-0.0958705	0.00801575	-0.381355	0.0214416	0.145442	-0.289944	-0.230111	-0.289265	-0.53058	-0.419442	0.404001	-0.239676	-0.573233	0.0855411	-0.419559	-0.184746	0.0761332	-0.089423	0.203858	-0.12372	-0.0690892	0.175939	-0.151587	-0.449361	0.0613471	0.370499	0.563879	grey|0.5639
PDK3|NP_001135858.1	NA	grey	-0.148948	-0.214148	0.298895	-0.0512358	0.166259	0.485376	-0.307801	-0.0828822	-0.0976404	-0.221141	-0.155871	0.152034	-0.252972	-0.424498	-0.291915	-0.340365	-0.193328	0.0740347	-0.0217337	0.0332897	-0.117653	-0.109259	-0.0650665	0.297798	-0.0615784	-0.0164548	0.0713815	0.560876	grey|0.5609
PLCD3|NP_588614.1	NA	grey	0.0887083	0.0614879	0.146214	0.121489	0.0852583	-0.0178373	0.194632	0.30467	0.0468751	-0.00683579	-0.206831	-0.248873	0.0943868	-0.00663446	0.0711367	0.073652	-0.167011	-0.491819	-0.493808	-0.242918	-0.349201	-0.265539	-0.168647	0.0979328	-0.00642214	0.135219	-0.21009	-0.5572	grey|-0.5572
F3|NP_001171567.1	NA	grey	0.417434	-0.15114	-0.228041	5.99e-05	-0.314143	0.0178308	0.35727	-0.0410421	-0.111217	-0.101946	-0.387826	0.113245	0.292383	0.123413	0.0863488	0.304543	0.0995813	-0.194859	-0.380689	0.276102	0.236452	0.255619	0.197435	-0.206966	0.00688518	0.466346	0.230032	-0.551116	grey|-0.5511
PLCD1|NP_006216.2	NA	grey	-0.0970583	-0.684193	-0.0849813	-0.33455	-0.324212	0.324783	-0.226946	-0.32296	-0.289249	-0.0487505	-0.0664281	0.315541	-0.0349223	-0.0804485	-0.128449	0.0343923	0.110459	0.495342	0.363492	0.477846	0.353098	0.404101	0.324313	0.362866	0.086795	0.110926	0.369498	0.547499	grey|0.5475
HPCAL4|NP_057341.1	NA	grey	-0.72613	-0.423181	0.177607	-0.440267	-0.0673698	-0.0830172	-0.300593	-0.114893	-0.309228	-0.184957	-0.266459	0.148903	-0.287733	-0.341464	0.0386172	-0.339153	-0.240344	0.159131	0.206601	0.00377001	-0.164942	-0.0706478	0.104493	0.353405	-0.0718365	0.0721562	0.415042	0.544152	grey|0.5442
ATP6V1G2|NP_569730.1	NA	grey	-0.0596461	0.0282175	-0.356212	-0.335332	-0.0746693	0.107427	-0.15306	-0.284188	0.0164017	-0.24412	-0.177417	0.541814	0.243894	-0.106609	0.280989	-0.120793	0.270101	0.298303	0.15793	-0.0169623	0.180048	0.0692185	0.204205	0.119898	-0.142897	-0.121995	-0.185483	0.541091	grey|0.5411
L1CAM|NP_076493.1	NA	grey	0.163571	-0.0985825	-0.057732	-0.325719	0.00938725	0.306443	-0.334909	-0.246425	0.00845553	0.0596136	-0.327138	0.465038	0.0776184	0.00393862	-0.0520486	-0.338234	0.173498	0.229135	0.27955	0.00247693	0.0153096	0.107272	0.0598468	0.0768732	0.211179	0.236579	-0.117648	0.540664	grey|0.5407
CKAP5|NP_001008938.1	NA	grey	-0.0981344	-0.113359	0.319338	0.141097	-0.000660649	-0.33532	0.26779	0.265791	-0.0883129	0.265611	0.13463	-0.507008	-0.225892	0.173511	-0.157612	0.194613	-0.190266	-0.376121	-0.113682	0.0162917	-0.145957	-0.12521	-0.252771	-0.0336571	0.254826	0.215425	0.179252	-0.528257	grey|-0.5283
LINGO1|NP_116197.4	NA	grey	-0.46896	-0.317717	-0.439802	-0.455613	-0.195851	0.108292	0.0647491	-0.140994	0.10319	-0.0210295	-0.113457	0.385241	-0.0171979	-0.162386	0.569682	0.103156	0.392391	0.459697	0.212284	0.206673	0.105893	0.0789077	0.383744	0.14774	-0.53514	-0.244748	0.401921	0.52428	grey|0.5243
CDC37|NP_008996.1	NA	grey	0.377885	0.179867	-0.387997	-0.207285	-0.0208628	0.515196	-0.119178	-0.194143	0.165926	0.123649	-0.0562983	0.501106	0.35692	0.151306	0.160196	0.178486	0.473553	0.37939	0.204465	-0.207817	0.285172	0.124264	0.0908372	-0.00279075	-0.133594	-0.19237	-0.485832	0.509847	grey|0.5098
PLEKHA1|NP_001182537.1	NA	grey	0.291501	0.318987	-0.0182085	0.286458	0.198458	0.17381	0.0859475	0.161028	0.125963	0.0366825	0.191054	-0.285915	-0.0340174	-0.00335794	-0.0296658	0.0728985	-0.0788217	-0.253302	-0.353607	0.100858	-0.351097	-0.0854716	-0.0416531	-0.521814	-0.370465	-0.141204	-0.258823	-0.505783	grey|-0.5058
TF|NP_001054.1	NA	grey	0.137864	0.219506	-0.111858	0.0464424	0.0592689	0.00144908	-0.31522	-0.285775	-0.0675819	-0.262394	0.0972004	0.239621	0.108653	-0.0872021	-0.110822	-0.164709	-0.0418597	0.321706	0.159786	-0.218519	0.189507	0.159987	0.124617	-0.0731518	-0.0590191	-0.243951	-0.120786	0.492404	grey|0.4924
MAOA|NP_000231.1	NA	grey	0.215497	0.108659	-0.117557	0.312741	-0.0787451	-0.146691	0.185028	-0.0831828	-0.157024	-0.440602	0.0434339	-0.117825	0.077041	-0.126595	-0.0561659	0.14345	-0.16365	-0.197427	-0.438194	0.348493	0.158649	0.170006	0.133356	-0.472931	-0.223602	0.0558843	0.218426	-0.483581	grey|-0.4836
MATR3|NP_061322.2	NA	grey	-0.10069	0.366601	-0.0935332	0.234741	0.0458501	-0.401364	0.124048	0.0896033	0.0595358	0.103292	0.414191	-0.402394	0.259641	0.268072	0.322124	0.251552	-0.0088272	-0.171006	-0.0763672	-0.353236	-0.185668	-0.128182	-0.0832204	-0.114626	-0.0949865	-0.424538	-0.384036	-0.473778	grey|-0.4738
HLA-A|NP_002107.3	NA	grey	0.322834	0.148366	-0.0495885	0.0768805	0.0623514	0.196184	0.19359	0.231755	0.264572	0.225282	-0.0818779	-0.0222485	0.13854	0.240556	0.0633949	0.223543	0.223852	-0.232711	-0.235137	0.0580072	0.061697	-0.124612	-0.178921	-0.176342	0.129894	0.12639	-0.237636	-0.470879	grey|-0.4709
SLC1A4|NP_003029.2	NA	grey	-0.36599	-0.0181035	0.0945023	-0.213793	-0.00159687	0.0307503	0.362844	0.38948	0.367305	0.222081	-0.20646	0.287534	-0.392725	-0.242402	0.0307649	-0.116962	0.193689	0.0900864	0.289028	-0.0136055	0.126138	-0.301776	-0.0820397	0.600844	-0.0172928	0.0808943	0.247591	0.46933	grey|0.4693
METTL7A|NP_054752.3	NA	grey	-0.0643751	-0.37257	-0.14653	-0.290195	-0.0635826	0.0442621	-0.431609	-0.34776	-0.231744	-0.411775	-0.0496467	0.326958	0.0957079	-0.153992	-0.0135194	-0.186927	-0.0135104	0.277543	0.0577597	0.226918	0.138132	0.183128	0.219313	0.176341	0.0750179	-0.06926	-0.0202537	0.455181	grey|0.4552
BDH2|NP_064524.3	NA	grey	-0.346087	-0.175993	0.0399609	-0.0216829	0.123859	-0.0571315	-0.177383	0.10919	0.180757	0.200896	0.375477	-0.124305	-0.240052	0.00718505	-0.0233892	0.030698	0.0203086	0.422798	0.383729	-0.246422	0.0535066	-0.0728351	-0.0278733	0.377288	-0.0215351	-0.432647	0.0972269	0.448926	grey|0.4489
PC|NP_071504.2	NA	grey	-0.181456	0.300488	-0.177321	-0.101482	0.123944	0.0335626	0.347629	0.291454	0.539284	0.287062	-0.0878242	0.296283	-0.162236	-0.0666635	0.214956	-0.0297465	0.369297	0.188905	0.326427	-0.309882	0.135888	-0.287748	-0.128671	0.247957	-0.159432	-0.0871994	-0.0265053	0.445018	grey|0.445
MAOB|NP_000889.3	NA	grey	0.348556	0.0119224	-0.272429	0.152367	-0.191979	0.0640982	0.457676	-0.027569	-0.100442	-0.314144	-0.149204	0.0720682	0.0432242	-0.127903	-0.00515834	0.335945	0.0721583	-0.193615	-0.456998	0.530197	0.28951	0.213436	0.177146	-0.544148	-0.361696	0.280371	0.31753	-0.441517	grey|-0.4415
PPAP2B|NP_003704.3	NA	grey	0.198234	0.0258207	0.027226	0.08725	0.0391386	0.292491	0.101084	0.165238	-0.0546226	-0.333986	-0.335168	0.0303605	-0.0736007	-0.283464	-0.104241	0.0315871	-0.187883	-0.314784	-0.6318	0.290167	-0.0933336	-0.061462	0.0582461	-0.350628	-0.349984	0.210268	0.149094	-0.433101	grey|-0.4331
BASP1|NP_006308.3	NA	grey	-0.421949	0.215589	-0.0249022	-0.140233	0.242825	0.146973	0.00144114	0.0930637	0.249764	0.10114	0.0425802	0.0565333	-0.164983	-0.203707	0.360767	-0.117653	0.166161	0.0349079	0.0523699	-0.291674	-0.328842	-0.361132	-0.0993477	0.0446387	-0.443998	-0.392322	-0.103501	0.431411	grey|0.4314
EPRS|NP_004437.2	NA	grey	0.295995	0.0657271	0.209734	0.300688	-0.00367386	-0.42187	-0.19817	-0.209932	-0.489747	-0.242955	0.270175	-0.41996	0.0539587	0.125941	-0.430071	-0.00854034	-0.478421	-0.260652	-0.167023	8.9e-05	-0.0862452	0.228704	-0.0564377	-0.412707	0.272978	0.132115	-0.122062	-0.421966	grey|-0.422
ECHS1|NP_004083.3	NA	grey	-0.438291	-0.303069	0.280842	-0.276833	0.041647	0.313971	-0.196718	-0.000785311	-0.169083	-0.189118	-0.286523	0.158409	-0.328173	-0.457741	-0.0385285	-0.340784	-0.162118	-0.0628734	-0.0685917	0.242865	-0.281365	-0.170111	0.0320409	0.274734	-0.184723	0.0655375	0.262693	0.420234	grey|0.4202
PGM2L1|NP_775853.2	NA	grey	-0.0662492	-0.0729667	0.235503	-0.212224	0.226902	0.105419	-0.649103	-0.285999	-0.397576	-0.677608	-0.455333	0.267138	-0.0955491	-0.509266	-0.252029	-0.713552	-0.484922	-0.191395	-0.314669	-0.0413922	-0.429127	-0.0864245	0.0206245	-0.103439	-0.02357	0.216594	-0.0979419	0.409137	grey|0.4091
PSMD1|NP_002798.2	NA	grey	0.0518948	0.0928296	-0.531305	-0.116272	-0.287299	-0.00579303	-0.170919	-0.630267	-0.0849553	0.0836965	0.396857	0.268332	0.531193	0.365716	0.493246	0.266529	0.528787	0.595519	0.512255	0.0970139	0.40668	0.469074	0.362816	-0.206537	-0.112078	-0.488239	-0.121038	0.408636	grey|0.4086
PRPSAP2|NP_001230871.1	NA	grey	-0.247342	0.348629	0.122268	0.162309	0.252912	0.12274	-0.177966	-0.068711	0.105193	-0.0851594	0.137432	0.028553	-0.19607	-0.216994	-0.0724762	-0.280301	-0.0640886	0.132707	0.185287	-0.13937	-0.020546	-0.137641	-0.148146	-0.191599	-0.171832	-0.248687	0.0373127	0.399534	grey|0.3995
CSNK2B|NP_001311.3	NA	grey	-0.281526	-0.290449	0.103762	0.127259	-0.0795884	-0.35154	0.151133	0.077046	-0.14433	-0.0324857	0.136207	-0.43493	-0.00195881	0.0136607	0.0896037	0.0885206	-0.237144	-0.192808	-0.120896	-0.0371255	-0.225211	-0.0300156	-0.0105002	0.250442	0.0545381	0.00368243	0.153531	-0.391712	grey|-0.3917
CRYL1|NP_057058.2	NA	grey	-0.00925221	0.27441	-0.155874	-0.000697474	0.239899	0.045889	-0.218469	-0.141425	-0.0588693	-0.208185	0.144487	0.0455095	-0.0713646	-0.192707	0.00504894	-0.10568	-0.067802	0.106388	-0.00357076	-0.262616	-0.202188	-0.0531685	-0.00987399	-0.420707	-0.451552	-0.267623	-0.237592	0.378423	grey|0.3784
SERPINA1|NP_001121178.1	NA	grey	0.069542	-0.0486125	0.228681	0.274004	0.237597	0.129233	-0.542867	-0.381475	-0.355079	-0.345319	0.248746	-0.191697	0.0835431	-0.111555	-0.39141	-0.21042	-0.351823	0.0642461	0.0364445	-0.32905	-0.0425859	0.0922381	-0.219578	-0.0426007	0.214554	-0.14925	-0.274058	0.374624	grey|0.3746
RPLP0|NP_444505.1	NA	grey	-0.445113	0.0400453	0.0526432	-0.0633944	0.252327	-0.040105	-0.0130587	0.323461	0.445539	0.331883	0.214537	-0.0862886	-0.233289	0.00387321	0.199198	-0.0176413	0.144038	0.221983	0.274663	-0.464746	-0.11427	-0.376949	-0.190375	0.443397	-0.066634	-0.436851	-0.054823	0.363051	grey|0.3631
NCS1|NP_055101.2	NA	grey	0.0172941	-0.536935	-0.280661	-0.363156	-0.327712	0.230764	-0.0538581	-0.365007	-0.295906	-0.137387	-0.11886	0.358353	0.168786	0.00312429	0.0533202	0.19261	0.242615	0.310535	0.180923	0.420667	0.381925	0.354468	0.254179	0.146538	0.0345669	0.172476	0.138178	0.361668	grey|0.3617
MCAM|NP_006491.2	NA	grey	-0.243609	-0.00668921	0.235171	0.314542	0.242101	-0.00803504	-0.289022	-0.0391846	0.200741	0.287057	0.524178	-0.341734	-0.082531	0.142759	-0.136939	-0.134394	-0.0590209	0.345855	0.496532	-0.428069	-0.00968086	-0.0554837	-0.239373	0.378908	0.304043	-0.438457	-0.0766943	0.35762	grey|0.3576
NRN1|NP_057672.1	NA	grey	-0.360929	0.0048298	-0.0709514	-0.0939464	0.283349	0.352012	-0.0127014	0.159992	0.366672	-0.00580865	-0.175706	0.119409	-0.0665765	-0.291325	0.35632	-0.203161	0.151091	0.0220773	-0.0714944	-0.307103	-0.345271	-0.391846	-0.129604	0.276397	-0.367666	-0.225687	-0.117637	0.35695	grey|0.3569
DYNC1H1|NP_001367.2	NA	grey	-0.231128	0.188966	0.00154103	-0.314748	-0.248511	-0.547915	0.0406852	0.0915149	-0.147258	-0.155774	-0.43463	0.234678	0.0651788	0.012755	0.168995	-0.2043	-0.169816	-0.195819	-0.0835931	0.0670315	0.00651488	-0.0359356	0.209972	-0.0138923	0.123718	0.283143	0.17564	-0.3471	grey|-0.3471
FUNDC2|NP_076423.2	NA	grey	0.0308759	-0.295069	-0.235613	-0.102701	-0.426428	-0.383959	0.0208017	-0.386322	-0.572505	-0.210706	0.155906	-0.156913	0.333907	0.196353	0.191378	0.371036	-0.074182	0.00353634	-0.102469	0.259795	0.0930555	0.438905	0.368722	-0.209786	-0.0833663	-0.00578443	0.134492	-0.332762	grey|-0.3328
SLC25A10|NP_036272.2	NA	grey	0.0568822	-0.147434	-0.0636212	-0.271229	-0.0931831	0.378353	0.0621477	0.0519465	0.12011	-0.0632419	-0.342658	0.490794	-0.246321	-0.256129	-0.155463	-0.134295	0.143681	0.213731	0.0497134	0.466566	0.264798	0.0651245	0.191497	0.0771318	-0.129905	0.233922	0.307972	0.330197	grey|0.3302
RPA3|NP_002938.1	NA	grey	0.0516298	-0.151765	-0.133398	0.0921016	-0.055137	-0.106439	-0.172885	-0.44773	-0.104507	0.0467902	0.422059	-0.102273	0.152603	0.17596	0.165877	0.104252	0.200928	0.288772	0.269983	0.0452109	0.0804807	0.275895	0.131288	-0.111547	0.0251888	-0.326083	0.095886	0.323324	grey|0.3233
AHCY|NP_000678.1	NA	grey	-0.173188	-0.133168	0.168089	-0.0468293	0.15178	0.203917	-0.374189	-0.00726318	-0.0883226	-0.38443	-0.2178	0.178064	-0.306057	-0.436876	-0.393273	-0.460863	-0.39248	0.167891	-0.0250682	0.0917088	-0.0317663	-0.024567	0.0619086	0.076232	-0.0886069	0.0932373	0.198127	0.31731	grey|0.3173
RPS15A|NP_001025180.1	NA	grey	0.339894	0.30336	0.0401964	0.139041	0.290995	0.281232	0.0271439	0.170927	0.337934	-0.0154597	-0.232572	0.212143	-0.0330304	-0.190125	-0.0686811	-0.266982	0.0953387	-0.149901	-0.117339	-0.331595	-0.183147	-0.238709	-0.196542	0.0808425	-0.0297264	0.0793967	-0.291343	0.314436	grey|0.3144
GAK|NP_005246.2	NA	grey	-0.363689	0.239075	0.286047	0.34041	0.267369	-0.186507	0.107938	0.357867	0.158953	0.174868	0.372261	-0.555383	-0.313371	-0.0562543	-0.0983664	-0.0316689	-0.294348	-0.180866	-0.00246095	-0.249311	-0.332875	-0.321899	-0.279644	-0.0163956	-0.133819	-0.271481	-0.0390617	-0.314272	grey|-0.3143
MYO18A|NP_976063.1	NA	grey	0.0871829	-0.258864	0.10449	-0.063941	-0.0348777	0.138963	-0.325722	-0.156506	0.0309685	0.21839	0.239694	0.0679273	-0.0990616	0.15296	-0.242959	-0.142147	0.0839553	0.385609	0.434962	0.293974	0.160277	0.227389	0.0926661	0.208775	0.35611	-0.0748239	0.0679291	0.309143	grey|0.3091
DLG4|NP_001356.1	NA	grey	-0.387412	-0.24268	0.135554	-0.437546	0.0251499	0.149824	-0.253207	-0.00885751	-0.12046	-0.402249	-0.599592	0.386989	-0.165593	-0.511222	0.131883	-0.558395	-0.185218	-0.164114	-0.244688	0.205794	-0.396506	-0.218992	0.157845	0.298991	-0.168724	0.204098	0.160318	0.306301	grey|0.3063
PICK1|NP_036539.1	NA	grey	-0.110968	0.0222519	-0.139182	-0.153964	-0.385509	-0.564413	-0.0859872	-0.395643	-0.4103	-0.11105	0.14657	-0.0138047	0.414257	0.300723	0.272574	0.119128	-0.0225959	0.0225969	0.134828	0.135895	0.118633	0.2882	0.303639	-0.0730244	0.181497	-0.101606	-0.0504378	-0.304351	grey|-0.3044
LAMP2|NP_002285.1	NA	grey	0.00151668	0.0217012	-0.168463	0.230497	0.0470888	-0.0477801	-0.170317	-0.208669	0.114358	-0.048843	0.390401	-0.0218686	0.057747	0.0884121	-0.0581198	0.0639876	0.0749293	0.492024	0.317951	-0.0972556	0.380872	0.217166	0.0641231	-0.0325641	0.0235975	-0.35281	0.124282	0.297164	grey|0.2972
MFN2|NP_001121132.1	NA	grey	0.14725	0.250938	0.174736	0.0990717	0.0988324	0.260509	0.113146	0.252473	-0.000582913	-0.0205398	-0.0630069	-0.065699	-0.284829	-0.209713	-0.259252	-0.0423905	-0.182292	-0.263186	-0.28865	0.287154	-0.200946	-0.116333	-0.0262802	-0.363213	-0.31801	0.0920972	-0.0232369	-0.291348	grey|-0.2913
DNAJB3|NP_001001394.1	NA	grey	-0.389049	0.0974578	-0.237909	-0.269729	-0.277823	-0.456456	-0.0175848	-0.179694	-0.192475	-0.280008	0.00243705	0.296748	0.112528	-0.0644694	0.247313	0.0124125	0.00731292	0.295795	0.229303	0.00163396	0.317065	0.143959	0.323333	0.13638	-0.139413	-0.211756	0.178669	0.269771	grey|0.2698
DIRAS2|NP_060064.2	NA	grey	-0.140845	-0.220163	-0.173531	-0.095095	-0.06195	0.161185	0.102538	-0.0267571	-0.0204404	-0.195534	-0.093182	-0.0284346	0.036107	-0.169963	0.37683	0.127691	0.0809787	-0.120073	-0.423674	0.380561	-0.22263	-0.0158786	0.221679	-0.179231	-0.482928	-0.114383	0.220948	-0.266925	grey|-0.2669
UBE2L3|NP_003338.1	NA	grey	-0.388532	0.251113	0.106923	0.0239764	-0.107834	-0.455988	0.17352	0.0692419	-0.197817	0.0357078	0.10357	-0.23232	-0.142702	0.0155417	0.0697302	0.0574925	-0.197915	-0.14833	0.0713216	-0.0231088	-0.0516828	-0.0462428	-0.00248292	-0.257955	-0.13342	-0.0207004	0.230939	-0.263206	grey|-0.2632
CPT1A|NP_001027017.1	NA	grey	-0.324658	0.0867875	0.0488432	-0.306801	-0.133037	-0.2998	0.226043	0.14457	-0.0551278	-0.105982	-0.330503	0.323017	-0.196771	-0.212718	0.000380688	-0.159349	-0.0310644	-0.0881275	0.138423	-0.00528315	0.140021	-0.159955	0.000869932	0.266918	0.0516744	0.261648	0.157514	0.263236	grey|0.2632
LAMB2|NP_002283.3	NA	grey	0.329506	0.45599	-0.089634	0.20516	0.150583	-0.166741	-0.287489	-0.098313	0.0445329	-0.122216	0.27075	-0.146155	0.390552	0.165544	0.237626	-0.0483299	-0.0545216	-0.13064	-0.273918	-0.352929	-0.369326	-0.0329	0.103308	-0.191537	-0.123343	-0.509043	-0.602903	-0.252549	grey|-0.2525
CDH13|NP_001207417.1	NA	grey	-0.14618	0.230423	-0.268396	0.108042	0.199053	0.139194	0.0745491	-0.0554487	0.40885	0.225296	0.196717	-0.0172374	0.216639	0.135776	0.51348	0.125752	0.418059	0.185016	0.152694	-0.436514	-0.0465041	-0.170239	-0.14323	-0.0278344	-0.228085	-0.429498	-0.183465	0.252307	grey|0.2523
CCT6A|NP_001753.1	NA	grey	0.25348	0.443204	-0.240581	0.249142	0.252843	0.243864	0.116566	0.0829916	0.316943	-0.122806	0.0662969	0.0130066	0.0758844	-0.0700587	0.196672	0.0768133	0.180499	-0.138483	-0.361188	0.0558643	-0.0840735	-0.143708	-0.0679646	-0.606182	-0.449333	-0.208806	-0.205519	-0.251965	grey|-0.252
VPS13A|NP_150648.2	NA	grey	0.172693	-0.268589	-0.259954	-0.37302	-0.576638	-0.0887324	0.270639	-0.284827	-0.248368	0.380974	0.0908154	0.336369	0.095088	0.38561	-0.0308969	0.406528	0.447493	0.39596	0.633779	0.549996	0.663183	0.533198	0.302515	0.0424848	0.280717	0.276996	0.23747	0.249874	grey|0.2499
USP7|NP_003461.2	NA	grey	-0.0918589	0.256721	-0.158654	-0.192739	-0.0825784	-0.0129093	-0.250715	-0.457794	-0.368615	-0.608458	-0.30337	0.408027	0.200474	-0.321651	0.194278	-0.328326	-0.0954063	-0.0589223	-0.186475	0.180976	-0.062954	0.116995	0.258655	-0.419416	-0.33461	0.0129278	-0.00717179	0.249391	grey|0.2494
SORT1|NP_002950.3	NA	grey	-0.15649	-0.222647	0.0510416	-0.011619	-0.0257508	-0.0730024	-0.0637278	0.0670426	-0.08104	-0.0521039	0.155129	-0.0302069	-0.308871	-0.0991686	-0.337248	-0.00997681	-0.161749	0.275548	0.2349	0.160504	0.258559	0.13307	0.0277587	0.115047	0.0681783	0.0317546	0.278474	0.233084	grey|0.2331
SDR39U1|NP_064580.2	NA	grey	-0.214995	-0.254848	-0.466119	-0.291173	-0.177121	0.179236	-0.0197291	-0.202609	0.0825928	0.170161	0.0809894	0.199889	0.157062	0.175497	0.445457	0.337728	0.433341	0.508343	0.263056	0.135829	0.279732	0.212897	0.255211	-0.139556	-0.322685	-0.239977	0.232224	0.231698	grey|0.2317
NCAM1|NP_851996.2	NA	grey	-0.372235	-0.0893926	-0.284854	-0.211351	-0.11065	-0.15246	-0.347603	-0.366814	-0.170482	-0.491725	-0.165973	0.26249	0.408684	-0.142942	0.468985	-0.191184	-0.0427935	0.230476	-0.0532346	-0.195866	-0.0200723	0.0801134	0.307128	0.208585	-0.183128	-0.292149	-0.0196585	0.230673	grey|0.2307
LANCL1|NP_006046.1	NA	grey	-0.533315	-0.564646	0.115137	-0.402983	-0.317089	-0.220299	-0.223529	-0.362438	-0.659828	-0.309445	-0.135615	0.0451188	-0.213962	-0.252216	-0.0540613	-0.18104	-0.298308	0.0801244	0.128434	0.518651	-0.0608465	0.264784	0.306027	0.0154205	-0.0594172	0.228648	0.563917	0.229101	grey|0.2291
SCCPDH|NP_057086.2	NA	grey	-0.127353	-0.240667	-0.113168	0.129613	-0.140816	0.12956	0.1406	-0.179314	-0.19386	-0.0152803	0.140256	-0.254801	0.069463	-0.002992	0.17537	0.242082	0.0272594	-0.00337667	-0.0711342	0.283941	-0.0489179	0.194214	0.102898	-0.257311	-0.289172	-0.0188174	0.273492	-0.226584	grey|-0.2266
CUL4B|NP_001073341.1	NA	grey	-0.0297279	-0.290233	-0.293667	-0.186511	-0.359051	-0.168891	-0.199683	-0.164662	-0.0500268	0.326772	0.494356	-0.0885127	0.347843	0.529238	0.272671	0.378199	0.232295	0.508915	0.391164	0.232637	0.227559	0.387882	0.413017	0.249785	0.141999	-0.461801	-0.128703	-0.220152	grey|-0.2202
AP2A2|NP_036437.1	NA	grey	0.257193	0.325915	-0.137906	0.0972352	0.0275024	0.267272	0.193886	0.200592	0.368461	0.454786	0.296075	-0.0233016	-0.0121547	0.268683	0.0803561	0.286363	0.352768	0.12543	0.120786	0.190066	0.105181	-0.00147317	0.0118632	-0.274664	-0.177308	-0.260243	-0.192839	-0.219419	grey|-0.2194
HIBCH|NP_055177.2	NA	grey	-0.635164	-0.305408	0.207711	-0.347267	-0.0198337	0.0021953	0.00220364	0.202087	-0.20864	-0.261666	-0.349699	0.0833977	-0.441193	-0.529848	-0.0358826	-0.261326	-0.33222	-0.12539	-0.135175	0.14863	-0.297938	-0.246117	0.0763762	0.297781	-0.338107	0.14729	0.355725	0.21132	grey|0.2113
FSD1L|NP_001138785.1	NA	grey	-0.00466917	0.104483	0.3567	0.281399	0.200317	-0.031268	-0.253218	0.0715401	-0.111807	-0.247421	0.065903	-0.259803	-0.0752172	-0.18422	-0.385627	-0.338639	-0.512469	-0.194247	-0.175053	-0.16177	-0.2739	-0.124286	-0.135843	0.157579	0.157135	-0.0309452	-0.22497	-0.205559	grey|-0.2056
EHD4|NP_644670.1	NA	grey	0.0297443	-0.0927192	0.192541	-0.116335	-0.215663	-0.265444	-0.0202426	-0.146767	-0.398289	0.246126	0.0574469	-0.209564	0.0666554	0.309855	-0.0739261	0.154317	-0.0758129	-0.175435	0.126504	0.0224087	-0.0488724	0.161707	-0.0306902	-0.117014	0.324747	0.213742	0.0156341	-0.201962	grey|-0.202
SEC22B|NP_004883.2	NA	grey	-0.0327179	0.0546443	-0.442718	-0.0368248	-0.268854	-0.268695	-0.11819	-0.463633	-0.376964	-0.260221	0.327942	-0.0937774	0.501354	0.193012	0.519996	0.386255	0.0946545	0.1509	-0.125455	0.0381471	0.0159788	0.343994	0.40889	-0.431703	-0.443463	-0.4866	-0.0951677	-0.199619	grey|-0.1996
UNC13A|NP_001073890.2	NA	grey	-0.151043	-0.585091	0.0446254	-0.129417	-0.0526163	0.182275	-0.330967	-0.339847	-0.382647	-0.273825	-0.0373395	-0.080334	-0.018229	-0.192518	-0.0150387	-0.100845	-0.177519	0.0762143	-0.123546	0.252272	-0.213377	0.194777	0.167847	0.0302731	-0.108041	0.0312162	0.250156	0.188337	grey|0.1883
RAB3GAP1|NP_036365.1	NA	grey	0.374448	0.152235	-0.31969	0.0216414	-0.144574	0.231172	0.28032	-0.236183	0.046686	-0.0987423	-0.0176082	0.328811	0.133591	-0.0112906	0.115046	0.258001	0.393947	0.129619	-0.0647601	0.340843	0.398867	0.242796	0.174138	-0.36598	-0.264151	0.00629757	0.134318	0.187371	grey|0.1874
PPFIA3|NP_003651.1	NA	grey	0.122094	-0.0572271	-0.0848462	-0.430563	-0.150826	0.120724	0.296311	0.269511	0.0888094	0.14702	-0.455116	0.472784	-0.12422	-0.0531353	-0.0982093	0.0530325	0.20871	-0.0636078	0.0847514	0.103648	0.201752	-0.108853	-0.0107001	0.260896	0.0919127	0.453929	-0.0993122	0.184681	grey|0.1847
TRIM28|NP_005753.1	NA	grey	-0.678008	0.070664	0.200097	-0.235899	0.108389	-0.181329	-0.0325955	0.341491	0.234539	0.159693	-0.00584292	0.000774018	-0.310924	-0.152043	0.219416	-0.22324	-0.0458193	0.0229821	0.165246	-0.154864	-0.241934	-0.407121	-0.0556766	0.440441	-0.088667	-0.284917	0.0897043	0.176838	grey|0.1768
COX7A1|NP_001855.1	NA	grey	0.157264	-0.0760688	0.0858828	0.136103	-0.0624765	0.030635	0.0248151	-0.128494	-0.256135	0.0693282	0.0629095	-0.253277	-0.0284158	0.0681656	-0.178371	0.127824	-0.158325	-0.0486628	-0.0552682	0.0246954	-0.0841355	0.206334	0.0223197	-0.305974	-0.0695055	0.146141	0.173558	-0.16945	grey|-0.1694
THY1|NP_006279.2	NA	grey	-0.12879	0.106606	0.436652	0.155619	0.147417	-0.0722153	-0.378833	-0.205285	-0.460779	-0.627805	-0.229948	-0.0571348	-0.0891873	-0.482375	-0.344047	-0.552159	-0.644259	-0.327129	-0.315923	-0.177462	-0.343152	-0.0877843	-0.0635398	0.0300226	0.0248403	0.10826	-0.00388226	0.166431	grey|0.1664
IARS2|NP_060530.3	NA	grey	-0.240226	-0.292885	0.485632	0.00315925	-0.0680531	-0.453536	-0.589132	-0.330169	-0.559514	-0.263591	0.0565607	-0.299521	0.0120187	0.0330148	-0.25783	-0.46049	-0.564002	-0.173451	0.0183818	0.130145	-0.272835	0.154071	0.0363461	0.146299	0.600474	0.118137	0.142058	-0.164873	grey|-0.1649
GPX1|NP_000572.2	NA	grey	0.526186	0.131705	0.285528	0.222632	-0.0309624	0.160203	-0.101642	-0.113748	-0.301549	-0.142575	0.0212821	-0.0264509	0.0448982	0.0177708	-0.551301	-0.0529543	-0.225727	-0.245353	-0.134362	0.225662	0.122699	0.170012	-0.101837	-0.152709	0.350528	0.26404	-0.254959	-0.163824	grey|-0.1638
RAC3|NP_005043.1	NA	grey	0.0825316	0.127208	-0.0435221	0.213796	0.292202	0.370979	-0.0265029	0.0267458	-0.125146	-0.44357	-0.0122136	-0.157844	-0.0471226	-0.3492	-0.064863	0.121323	-0.197859	-0.304147	-0.616752	-0.0473613	-0.226699	-0.186949	-0.176735	-0.549146	-0.57269	-0.103992	-0.198477	-0.163577	grey|-0.1636
AP3B2|NP_004635.2	NA	grey	-0.453132	-0.111781	0.259243	-0.082928	-0.124519	-0.330903	-0.180953	-0.201018	-0.123716	0.124861	0.0260075	-0.0585579	0.0783988	0.139722	0.147181	-0.271488	-0.0379657	0.043451	0.388881	-0.0751149	-0.00767635	0.00607587	-0.0438138	0.425494	0.507795	-0.00869871	0.176409	0.163481	grey|0.1635
DDX3X|NP_001180346.1	NA	grey	0.0565562	0.302954	-0.0931088	0.000409622	0.0598737	0.153179	-0.0870728	-0.00568308	-0.00810106	0.114377	0.314757	-0.0143869	-0.00934295	0.0600154	0.0223597	0.222748	0.0926722	0.163981	0.0835903	-0.1206	0.0133633	0.00325583	0.0375463	-0.273806	-0.350461	-0.419788	-0.270271	0.156965	grey|0.157
GCN1L1|NP_006827.1	NA	grey	0.292323	0.45203	-0.0878306	-0.0312905	0.0203412	0.0867482	-0.139727	-0.0635727	0.16239	0.287625	0.0957736	0.22799	0.292842	0.315503	-0.0217741	-0.0236008	0.215979	0.184621	0.370768	-0.333111	0.144829	0.018924	-0.0629029	0.0383166	0.243547	-0.138585	-0.599719	0.152428	grey|0.1524
TCP1|NP_110379.2	NA	grey	0.43728	0.518824	-0.115749	0.191863	0.270592	0.455239	0.543718	0.314604	0.511231	0.281835	-0.239702	0.115135	-0.0277931	-0.00363662	0.111397	0.162657	0.410843	-0.363594	-0.282012	-0.134101	-0.0642396	-0.323973	-0.363029	-0.44497	-0.264909	0.226589	-0.253398	-0.149375	grey|-0.1494
BSN|NP_003449.2	NA	grey	0.274549	-0.0141094	0.229118	0.152341	0.235976	0.37783	-0.200184	-0.102047	-0.230571	-0.0551531	0.0308572	-0.198096	-0.128653	-0.151625	-0.364905	-0.0666932	-0.235201	-0.183919	-0.196354	-0.157419	-0.328083	-0.0223317	-0.198892	-0.285366	-0.128698	0.0846068	-0.218196	0.139786	grey|0.1398
TMEM245|NP_114401.2	NA	grey	0.173882	0.187181	-0.306904	0.1057	0.0430233	0.186932	0.233818	-0.119269	0.00690367	-0.253961	-0.0745135	0.166362	-0.097045	-0.241921	-0.000875813	0.126667	0.108286	0.0660115	-0.164924	0.185544	0.17565	0.119834	0.0803098	-0.656729	-0.561048	0.0844717	0.245187	0.127835	grey|0.1278
PDS5A|NP_001093869.1	NA	grey	0.329493	-0.0027184	0.186135	0.0423839	0.0812244	0.420995	-0.22992	-0.113718	-0.0466212	0.23245	0.193271	-0.0221986	0.0178547	0.138921	-0.29571	-0.0693442	0.0650324	0.010668	0.171959	0.167293	-0.0777548	0.0763425	-0.126396	0.00501335	0.259895	-0.00290325	-0.412506	0.122375	grey|0.1224
PRKCSH|NP_001001329.1	NA	grey	-0.176118	0.371467	-0.0839989	0.408113	0.300081	0.0139875	0.143418	0.128327	0.233292	-0.133354	0.41611	-0.371904	-0.0406093	-0.18705	0.311069	0.160919	-0.0122934	-0.11111	-0.320679	-0.267538	-0.304925	-0.264435	-0.0908268	-0.282162	-0.655561	-0.642464	-0.102106	-0.121135	grey|-0.1211
PSD3|NP_056125.3	NA	grey	-0.397632	0.138124	-0.0384824	-0.297969	-0.013395	0.141699	0.074795	0.123542	0.102398	0.104966	-0.24227	0.24821	-0.164853	-0.117223	0.206567	-0.0725562	0.142889	0.0305231	0.110703	0.123941	0.00923993	-0.186137	-0.00843897	-0.119157	-0.241328	0.0445626	0.144111	0.120824	grey|0.1208
COL25A1|NP_942014.1	NA	grey	0.194329	0.0326876	0.0478485	0.0392743	0.0673826	0.342187	0.205729	0.269062	0.249261	0.442438	-0.176608	0.042111	-0.0991412	0.101458	-0.0713795	0.100182	0.232951	-0.045661	0.173094	-0.179468	0.017533	-0.0946279	-0.242917	0.0380179	0.0932484	0.284089	-0.0222668	0.12065	grey|0.1207
|XP_003403495.1	NA	grey	0.301496	-0.131896	0.0196168	-0.251817	-0.0765646	0.243834	-0.0478936	-0.00338403	-0.183203	-0.216808	-0.576516	0.4003	-0.12262	-0.211246	-0.319413	-0.127655	-0.105552	-0.08605	-0.216152	0.18786	0.13662	0.090194	0.0815289	-0.176802	0.0068828	0.555281	0.178629	0.119587	grey|0.1196
RPL18|NP_000970.1	NA	grey	-0.432992	-0.0702869	0.319684	-0.0529208	0.277913	-0.0802608	-0.333287	0.163217	-0.0279849	-0.239815	0.0304211	-0.193613	-0.294609	-0.382243	0.0429078	-0.436788	-0.366664	-0.213658	-0.23982	-0.081473	-0.661066	-0.350552	-0.0318595	0.253592	-0.203025	-0.287434	-0.0533798	0.114602	grey|0.1146
COASY|NP_001035997.2	NA	grey	0.0794419	0.147448	0.233156	0.263576	0.236292	0.250147	0.0944573	0.199336	-0.118251	-0.325377	-0.244783	-0.154416	-0.270211	-0.466334	-0.181941	-0.149206	-0.304236	-0.513357	-0.53446	0.023773	-0.392163	-0.224394	-0.19553	-0.3796	-0.395213	0.221029	0.0940752	-0.113661	grey|-0.1137
SLC12A2|NP_001037.1	NA	grey	0.268793	-0.352836	-0.117872	0.246778	-0.0410843	0.179086	0.266051	0.0500672	0.0853268	0.143358	0.364446	-0.278128	-0.136734	0.0500902	-0.103572	0.41987	0.143526	0.126961	-0.0671872	0.316055	0.125553	0.199249	0.0734429	-0.073286	-0.195387	-0.100359	0.247859	-0.11121	grey|-0.1112
PCYOX1L|NP_076933.3	NA	grey	0.504189	-0.0331023	-0.38574	-0.22677	-0.165523	0.566536	0.175321	0.0152803	0.153751	0.302012	-0.0762441	0.368915	0.171353	0.192413	0.0056861	0.399692	0.449137	0.291863	0.106333	0.174458	0.297638	0.210486	0.178335	-0.0917962	-0.218669	0.0567835	-0.277187	0.109465	grey|0.1095
KHSRP|NP_003676.2	NA	grey	0.464119	0.0480357	-0.048307	-0.138953	-0.113217	0.257819	-0.079818	-0.193543	-0.225504	0.201907	-0.0958935	0.0740271	0.212608	0.22858	-0.0601076	0.0991175	0.110248	-0.11282	-0.0175734	0.0984968	-0.145166	0.202783	0.0639499	-0.332866	0.0350669	0.221409	-0.331363	-0.108401	grey|-0.1084
IDH3B|NP_008830.2	NA	grey	-0.220585	0.0733448	0.0968273	-0.240777	0.0409273	0.249537	-0.0639548	-0.0553586	-0.224845	-0.493952	-0.551316	0.327978	-0.189187	-0.549478	0.0432429	-0.380331	-0.18767	-0.329664	-0.420685	0.356622	-0.274781	-0.169918	0.0814149	-0.303386	-0.418716	0.27117	0.194357	0.100395	grey|0.1004
RPL18A|NP_000971.1	NA	grey	-0.185649	0.110059	0.0266702	-0.0633088	0.160552	0.323912	0.233266	0.370515	0.480945	0.313518	-0.140067	0.110553	-0.300892	-0.112601	0.150816	-0.0266547	0.255019	0.0149577	0.0228461	0.0771729	-0.0638399	-0.306614	-0.117202	0.0319491	-0.241746	-0.0337435	0.183647	0.0742558	grey|0.0743
TIAM1|NP_003244.2	NA	grey	0.00370623	0.0346706	-0.368421	-0.00156938	-0.190545	-0.115812	0.122165	-0.231852	0.132433	0.495202	0.474394	-0.146151	0.394706	0.580888	0.546748	0.520039	0.546295	0.320402	0.369521	-0.0793469	0.207431	0.226935	0.103755	-0.147799	-0.00867711	-0.423525	-0.0819739	-0.0704933	grey|-0.0705
GLRX5|NP_057501.2	NA	grey	0.0612638	0.0407377	0.241158	-0.11059	-0.00798701	-0.382681	-0.227999	-0.0405617	-0.181023	-0.084383	-0.00652752	-0.00179079	-0.010959	-0.000833703	-0.150183	-0.330862	-0.249068	-0.165995	0.0325506	-0.108452	-0.277662	-0.0336518	0.051882	0.290847	0.329464	0.0317496	-0.234771	0.0683966	grey|0.0684
GDA|NP_004284.1	NA	grey	0.172028	0.43099	-0.00682561	-0.0224074	0.23634	0.326868	0.123906	0.238966	0.0614834	0.0212105	-0.116751	0.104648	-0.203811	-0.189139	-0.206027	0.0252627	-0.0253716	-0.207328	-0.147076	-0.15729	-0.151282	-0.250911	-0.22851	-0.431511	-0.388493	0.0952175	-0.390108	0.0661268	grey|0.0661
WDR7|NP_443066.2	NA	grey	-0.311135	-0.0731191	0.0910465	0.188174	-0.00392755	-0.248764	-0.172215	-0.184426	-0.261281	-0.138092	0.296362	-0.360375	-0.0809877	-0.0418873	-0.0163609	0.0239269	-0.290509	0.117308	0.032306	-0.0653337	-0.0688178	0.131205	0.0774837	-0.205642	-0.167147	-0.249557	0.331263	-0.0519584	grey|-0.052
FAU|NP_001988.1	NA	grey	-0.0285104	0.0783595	0.0283534	0.294716	0.201078	0.346615	0.25702	0.201854	0.323383	0.33809	0.205003	-0.211473	-0.285929	-0.00511994	-0.109181	0.188327	0.162331	0.104195	0.147915	-0.017766	0.109457	-0.101668	-0.264679	-0.244116	-0.197855	-0.0425353	0.211677	0.048538	grey|0.0485
C17orf61|NP_689979.1	NA	grey	0.0425544	-0.128961	-0.248623	-0.0725597	-0.0187965	0.0330534	-0.194216	-0.127613	0.00510381	0.0484672	-0.0318864	0.0753824	0.22611	0.199236	0.105441	0.121402	0.116531	0.234332	0.156546	-0.20525	0.173108	0.118627	0.00741312	-0.127633	0.0724944	0.021046	-0.0683334	0.0338939	grey|0.0339
SEPT5|NP_001009939.1	NA	grey	-0.313077	-0.237096	0.170659	-0.228735	-0.182736	-0.252948	-0.502446	-0.473675	-0.679582	-0.312526	-0.00232531	-0.0880781	0.111362	-0.0213077	-0.020198	-0.268372	-0.362839	-0.0695557	0.0405651	0.258198	-0.229323	0.233824	0.181163	-0.164327	0.15426	0.0681067	0.0594546	-0.0323304	grey|-0.0323
EPN1|NP_037465.2	NA	grey	0.0110795	0.0855808	-0.311543	-0.108444	-0.16359	0.0746833	-0.187701	-0.178882	-0.0662315	0.169018	0.491295	0.0244972	0.272268	0.328322	0.15989	0.377932	0.228428	0.440035	0.316786	0.0688554	0.267152	0.242783	0.221499	-0.103237	-0.149963	-0.532494	-0.36128	0.0274291	grey|0.0274
CADPS|NP_003707.2	NA	grey	0.0392022	0.146093	0.251699	0.132069	0.0757634	-0.496552	-0.215225	0.0526307	-0.115896	-0.0196412	0.277156	-0.203267	-0.112115	0.113671	-0.388318	-0.181768	-0.341289	-0.00886475	0.196378	-0.227972	0.0117908	0.00204667	-0.104166	0.141125	0.430915	-0.0528556	-0.185382	-0.0270307	grey|-0.027
RPS5|NP_001000.2	NA	grey	0.141445	0.39765	-0.420761	-0.220151	-0.116372	-0.0998116	-0.00960449	0.0640775	0.243038	0.239966	0.162339	0.249832	0.437565	0.366294	0.444319	0.277086	0.373854	0.253084	0.174598	-0.339068	0.105311	-0.00258909	0.209673	0.111365	-0.137467	-0.47553	-0.613927	-0.0235157	grey|-0.0235
EHD2|NP_055416.2	NA	grey	-0.459181	0.117578	0.271539	0.140845	0.318256	0.0929313	-0.0443587	0.169952	0.0584976	-0.0543443	-0.0120847	-0.266216	-0.407963	-0.33759	-0.0365948	-0.259155	-0.264891	-0.188997	-0.126499	-0.0951127	-0.40128	-0.332244	-0.23874	-0.24883	-0.336585	-0.0618375	0.236294	0.0202589	grey|0.0203
RAP1B|NP_001238846.1	NA	grey	0.212389	0.364682	-0.215522	-0.160603	0.00777481	0.33369	0.347112	0.250099	0.512091	0.512488	-0.267259	0.341675	0.222642	0.273496	0.360579	0.205548	0.585594	-0.0159591	0.112258	-0.256843	0.129708	-0.218402	-0.148406	0.0733448	0.00967009	0.0601069	-0.330665	0.0165756	grey|0.0166
CAB39|NP_057373.1	NA	grey	0.080562	0.223503	-0.0246927	0.142634	0.27542	0.267964	-0.288911	-0.0830796	-0.123046	-0.448835	0.0921575	-0.0349129	-0.160965	-0.372201	-0.180075	-0.18368	-0.283439	-0.0522074	-0.363631	0.141209	-0.267632	-0.0386025	0.0512695	-0.595552	-0.560516	-0.21959	-0.133618	0.0164235	grey|0.0164
PCCA|NP_000273.2	NA	grey	0.132167	0.259751	-0.0791793	-0.004724	-0.019432	0.0273532	-0.0452027	-0.180581	-0.0922674	-0.398138	-0.169413	0.250852	0.0325519	-0.271588	0.106001	-0.239781	-0.0285849	-0.144231	-0.286942	0.345019	-0.113975	0.057592	0.234853	-0.370751	-0.320191	-0.0140987	0.0672145	0.0113628	grey|0.0114
EXOG|NP_005098.2	NA	grey	-0.0122583	0.203836	-0.271463	0.0721717	0.0335459	-0.0238179	0.269091	0.24857	0.371155	0.124617	0.254609	0.0331625	-0.00548321	0.0262502	0.171595	0.19929	0.223032	0.181126	0.109968	-0.0550807	0.116177	-0.0984008	0.0545932	0.128131	-0.269021	-0.33185	-0.190932	-0.0108578	grey|-0.0109
NIPSNAP3A|NP_056284.1	NA	grey	0.115061	0.163855	-0.241656	0.203395	0.236682	0.184695	0.14561	0.0474786	0.289915	-0.097026	-0.0017514	0.00474642	0.16684	-0.00879061	0.226024	0.201012	0.238526	-0.0547992	-0.239647	-0.303911	0.103402	-0.174847	-0.237758	-0.216946	-0.187588	-0.122235	-0.155642	0.00736993	grey|0.0074
CLU|NP_001822.3	NA	grey	0.423221	0.411194	-0.219517	0.236025	0.107931	-0.0317252	0.155356	0.0488434	0.321189	0.0496363	0.201857	0.0470095	0.133482	0.0817508	0.125781	0.0881809	0.221099	0.0356027	-0.0701364	-0.158174	0.0022605	0.00251067	0.0635514	-0.170974	-0.195462	-0.278251	-0.253136	0.00442289	grey|0.0044
NIPSNAP1|NP_003625.2	NA	grey	0.167186	0.289512	-0.0422691	0.296422	0.199636	-0.0378231	0.230603	0.15542	0.160078	0.00848363	0.232373	-0.20865	-0.00369348	-0.0523257	-0.00429129	0.14207	0.000141107	-0.150596	-0.127827	-0.378251	-0.146689	-0.171974	-0.181754	-0.0433418	-0.221436	-0.208554	-0.309849	-0.00294724	grey|-0.0029
GGT7|NP_821158.2	NA	grey	-0.156459	-0.109999	-0.42967	-0.341516	-0.132765	0.438149	0.325547	0.180676	0.21447	-0.196258	-0.556345	0.500743	-0.0141422	-0.330222	0.375469	0.144867	0.278832	0.0922177	-0.302734	0.318598	0.147008	-0.0786444	0.263622	-0.0892895	-0.668665	0.152912	0.296669	0.00114466	grey|0.0011
CORO2B|NP_006082.3	M11	greenyellow	0.175791	0.373533	0.23628	0.318091	0.569761	0.374193	0.466339	0.820701	0.904982	0.471541	-0.11667	-0.113777	-0.397333	-0.1252	-0.11753	-0.0580877	0.198153	-0.325592	-0.174987	-0.545551	-0.255014	-0.716196	-0.620485	0.315738	-0.00564819	0.0402141	-0.282207	0.00913178	greenyellow|0.905
IVD|NP_002216.2	M11	greenyellow	-0.111671	0.277889	0.0822289	0.233151	0.482229	0.246945	0.525817	0.767545	0.892973	0.381206	-0.00121405	-0.0900378	-0.47205	-0.209278	0.0629849	-0.000111877	0.254559	-0.160728	-0.0914003	-0.337286	-0.175141	-0.664519	-0.458512	0.280048	-0.240063	-0.122464	-0.043982	0.0771891	greenyellow|0.893
GNB1|NP_002065.1	M11	greenyellow	0.417631	0.455809	0.0208937	0.346259	0.500546	0.498836	0.445526	0.664819	0.878568	0.448063	-0.106609	-0.0452338	-0.106999	0.0210501	0.0175302	0.110322	0.340544	-0.269151	-0.253391	-0.556092	-0.162502	-0.566577	-0.526168	0.104763	-0.0896511	-0.0186397	-0.44834	-0.108731	greenyellow|0.8786
GNB4|NP_067642.1	M11	greenyellow	0.410644	0.408912	-0.117418	0.23833	0.440515	0.397847	0.412119	0.599715	0.875881	0.470142	-0.091217	0.0163025	-0.0271352	0.111695	0.135783	0.157188	0.426407	-0.168861	-0.182731	-0.557454	-0.121053	-0.498625	-0.436181	0.0788445	-0.0928698	-0.0520254	-0.453443	-0.0841209	greenyellow|0.8759
PSMD2|NP_002799.3	M11	greenyellow	0.193163	0.283005	-0.108734	0.0901256	0.407627	0.572556	0.472381	0.635752	0.864176	0.447069	-0.0753274	0.14417	-0.312596	-0.0957188	0.0627686	0.129117	0.475229	-0.0574094	-0.0699795	-0.156524	-0.0407701	-0.508681	-0.374989	0.0577488	-0.294069	-0.0435036	-0.240562	0.126543	greenyellow|0.8642
CAPZA1|NP_006126.1	M11	greenyellow	0.327439	0.303151	-0.0823304	0.335958	0.543691	0.607579	0.389962	0.547531	0.85879	0.32392	-0.099292	0.00947913	-0.169492	-0.0935843	0.0202925	0.115383	0.378898	-0.116844	-0.215423	-0.492512	-0.0631972	-0.510753	-0.52068	-0.000272986	-0.219407	-0.0257587	-0.276301	0.112804	greenyellow|0.8588
HIST1H1T|NP_005314.2	M11	greenyellow	-0.124002	0.480288	0.114806	0.226033	0.582398	0.262283	0.189542	0.627993	0.856546	0.438972	0.166812	-0.120172	-0.331062	-0.106175	0.121632	-0.134003	0.21699	-0.0562418	0.0493339	-0.604828	-0.362271	-0.67372	-0.454904	0.250547	-0.228402	-0.415429	-0.376299	0.224958	greenyellow|0.8565
CAPZA2|NP_006127.1	M11	greenyellow	0.160581	0.313526	0.118394	0.242693	0.636531	0.463052	0.200085	0.615022	0.851258	0.322857	-0.183957	0.00776075	-0.278454	-0.144344	-0.0806066	-0.173045	0.194832	-0.163525	-0.138296	-0.654836	-0.237784	-0.648724	-0.596128	0.215533	-0.0166146	0.0159127	-0.338225	0.206815	greenyellow|0.8513
AIP|NP_003968.2	M11	greenyellow	0.221473	0.324697	0.257023	0.350391	0.462644	0.369618	0.462957	0.73284	0.82968	0.520508	-0.121074	-0.130362	-0.332897	-0.020074	-0.161855	-0.0130556	0.201783	-0.282243	-0.110354	-0.43614	-0.120309	-0.580852	-0.580311	0.267383	0.126296	0.130185	-0.161902	-0.095563	greenyellow|0.8297
C15orf63|NP_057484.3	M11	greenyellow	-0.00252851	0.0710572	-0.0423664	0.323228	0.294192	0.231187	0.46744	0.524089	0.818019	0.598015	0.364173	-0.289066	-0.20684	0.136493	0.212196	0.267148	0.425911	0.0653898	0.103214	-0.192863	-0.0686088	-0.356177	-0.29433	0.308226	-0.115546	-0.345934	-0.0440918	-0.0679514	greenyellow|0.818
PPP2CB|NP_001009552.1	M11	greenyellow	0.323997	0.258625	0.0784029	0.305916	0.354343	0.563167	0.564681	0.618192	0.817822	0.686704	-0.0158795	-0.0829942	-0.215278	0.131543	-0.0965678	0.24442	0.43511	-0.117682	0.0403555	-0.345119	0.0640791	-0.428484	-0.543654	0.179725	0.0621047	0.107246	-0.216295	-0.0339834	greenyellow|0.8178
ARPC1A|NP_006400.2	M11	greenyellow	-0.0167487	0.366073	-0.105589	0.144832	0.425647	0.38002	0.348521	0.62707	0.817095	0.465762	0.148074	-0.0648461	-0.272537	-0.0215639	0.152792	0.128005	0.340704	0.014805	-0.00250763	-0.292367	-0.174331	-0.510744	-0.32806	0.0340656	-0.373719	-0.302645	-0.30462	-0.011736	greenyellow|0.8171
RPLP1|NP_000994.1	M11	greenyellow	-0.154651	0.273912	-0.317258	0.00974557	0.316284	0.331341	0.359707	0.430854	0.804327	0.405069	0.0985239	0.112848	-0.169394	-0.0442896	0.415014	0.167121	0.515759	0.224995	0.120284	-0.328742	-0.0523722	-0.40904	-0.167197	0.0719187	-0.515179	-0.393842	-0.122114	0.280951	greenyellow|0.8043
HIST1H1C|NP_005310.1	M11	greenyellow	-0.0360414	0.349947	-0.0939555	0.221329	0.49477	0.375782	0.269505	0.497112	0.801576	0.381707	0.250067	-0.120106	-0.257943	-0.107086	0.251501	0.0623764	0.345489	0.0260215	-0.0375103	-0.385656	-0.318406	-0.516299	-0.299273	0.0576686	-0.483233	-0.48612	-0.287467	0.189766	greenyellow|0.8016
ABAT|NP_065737.2	M11	greenyellow	0.235826	0.355916	0.248578	0.190029	0.396419	0.450266	0.51269	0.737413	0.795561	0.606955	-0.159074	-0.00851738	-0.349868	-0.0183033	-0.118609	0.0130101	0.309375	-0.313643	-0.0586108	-0.327914	-0.151551	-0.596437	-0.541504	0.291432	0.0781541	0.145337	-0.265433	0.000117342	greenyellow|0.7956
STAT3|NP_644805.1	M11	greenyellow	0.227625	0.520377	-0.0426018	0.31958	0.317567	0.23406	0.528675	0.611695	0.784043	0.437079	0.0577037	-0.104785	-0.147894	0.078036	0.153483	0.20763	0.341689	-0.208835	-0.196373	-0.2234	-0.0606033	-0.43986	-0.314674	-0.109614	-0.227981	-0.150729	-0.180796	-0.330803	greenyellow|0.784
HNRNPU|NP_004492.2	M11	greenyellow	-0.138788	0.563445	-0.0526455	0.0267868	0.387288	0.23305	0.268301	0.558393	0.778461	0.411538	-0.0683651	0.0823845	-0.087346	-0.00384557	0.366371	-0.0344598	0.341913	-0.0966447	-0.020636	-0.541342	-0.258841	-0.612363	-0.32193	0.162174	-0.268375	-0.312048	-0.40357	0.0461608	greenyellow|0.7785
RBL2|NP_005602.3	M11	greenyellow	0.382382	0.545391	-0.166504	0.131827	0.35535	0.435693	0.263355	0.376754	0.770555	0.477904	0.0567061	0.112552	0.108572	0.171457	0.246128	0.104428	0.495484	-0.0615691	-0.0442422	-0.417936	-0.166303	-0.4068	-0.275145	0.0183474	-0.169374	-0.281421	-0.655852	-0.00439632	greenyellow|0.7706
NDUFA4|NP_002480.1	M11	greenyellow	0.167117	0.219808	0.0329896	0.422902	0.539347	0.68406	0.480368	0.638009	0.758778	0.251569	0.0785102	-0.179572	-0.38328	-0.262943	-0.115287	0.189536	0.21959	-0.168718	-0.305058	-0.23484	-0.123214	-0.535774	-0.503745	-0.0105669	-0.432578	-0.127753	-0.170935	-0.00572537	greenyellow|0.7588
PSMC6|NP_002797.3	M11	greenyellow	-0.0246069	0.473126	0.00358811	0.333228	0.608256	0.364662	0.293475	0.563303	0.750315	0.0992607	0.103597	-0.133521	-0.355453	-0.329635	0.121788	-0.0844465	0.144262	-0.221741	-0.319753	-0.327525	-0.398082	-0.634159	-0.392717	-0.125648	-0.55939	-0.345968	-0.263287	0.046955	greenyellow|0.7503
CENPV|NP_859067.2	M11	greenyellow	0.280726	0.254063	0.100363	0.26547	0.235668	0.361227	0.539175	0.608825	0.74881	0.658446	0.0268724	-0.0939383	-0.12628	0.198747	0.00455792	0.275538	0.414982	-0.143858	0.0213472	-0.317581	0.0757646	-0.395133	-0.428413	0.318549	0.141565	0.00461041	-0.206961	-0.130096	greenyellow|0.7488
NDUFA9|NP_004993.1	M11	greenyellow	0.159435	0.214685	-0.077345	0.157768	0.291789	0.523536	0.658959	0.588261	0.748457	0.315228	-0.228692	0.142684	-0.365892	-0.207037	0.042114	0.193967	0.416108	-0.130861	-0.203022	-0.0394701	0.0995447	-0.426765	-0.322658	-0.0330918	-0.36444	0.135623	0.147011	0.0640969	greenyellow|0.7485
PDHA1|NP_000275.1	M11	greenyellow	0.432091	0.512043	0.261517	0.493462	0.720998	0.752026	0.232879	0.592191	0.74599	0.295642	-0.0722645	-0.160666	-0.288386	-0.182705	-0.268639	-0.089999	0.116857	-0.397293	-0.372934	-0.506475	-0.338204	-0.638153	-0.706101	-0.143435	-0.143979	0.0106915	-0.496062	-0.0124884	greenyellow|0.746
PRKAG1|NP_002724.1	M11	greenyellow	0.438853	0.344448	0.00893665	0.215351	0.194188	0.314298	0.62162	0.603787	0.739359	0.652832	-0.112338	-0.0465663	-0.00438172	0.258222	0.111542	0.280592	0.459951	-0.302374	-0.122609	-0.286471	-0.0320863	-0.384842	-0.382464	0.159671	0.108207	0.139221	-0.311615	-0.33591	greenyellow|0.7394
HEPACAM|NP_689935.2	M11	greenyellow	0.219331	0.298844	0.0963715	0.349698	0.496262	0.529164	0.503113	0.516272	0.73722	0.331531	-0.198168	-0.0722858	-0.332891	-0.207815	-0.0478265	-0.0520056	0.244857	-0.294511	-0.227142	-0.308931	-0.23615	-0.513982	-0.511758	-0.0772017	-0.230948	0.18004	-0.0478966	0.0340284	greenyellow|0.7372
GSTT2B|NP_001074312.1	M11	greenyellow	-0.114066	0.0670331	-0.00293509	0.193875	0.373208	0.289993	0.403991	0.47628	0.732413	0.445866	0.199349	-0.153496	-0.302907	-0.0212291	0.150881	0.134643	0.383753	-0.0143476	0.0652729	-0.183572	-0.0784499	-0.457777	-0.402241	0.222339	-0.126872	-0.205719	-0.0581336	0.123295	greenyellow|0.7324
PSMB5|NP_002788.1	M11	greenyellow	0.258658	0.466371	-0.363299	0.246193	0.228178	0.0889843	0.31666	0.25744	0.73206	0.472808	0.311688	-0.0515836	0.222854	0.334759	0.413742	0.2664	0.534528	0.135618	0.128855	-0.41857	0.00468928	-0.200104	-0.154678	-0.0481932	-0.160757	-0.416397	-0.440653	-0.096174	greenyellow|0.7321
DES|NP_001918.3	M11	greenyellow	0.0227994	0.174353	0.0809924	0.220166	0.45548	0.535459	0.538906	0.57938	0.71837	0.410305	-0.0721411	-0.0206694	-0.500173	-0.219423	-0.149872	0.122798	0.295283	-0.0670772	-0.00601921	-0.34338	0.0307677	-0.519962	-0.544916	0.0899808	-0.244644	0.081497	0.0386458	0.322413	greenyellow|0.7184
GPM6B|NP_001001995.1	M11	greenyellow	-0.118608	0.243795	-0.196475	0.221922	0.148517	0.0364655	0.605231	0.539584	0.709215	0.493574	0.279943	-0.206076	-0.174679	0.0952245	0.340703	0.354306	0.384023	0.0580903	0.0615469	-0.171051	-0.0133717	-0.31367	-0.130941	0.115814	-0.377082	-0.342992	0.0343469	-0.19916	greenyellow|0.7092
HLA-DRA|NP_061984.2	M11	greenyellow	0.298797	0.301716	0.271556	0.528799	0.562904	0.158648	0.0749327	0.547259	0.70384	0.408298	0.257713	-0.419986	-0.15778	0.113718	-0.189554	-0.0902601	-0.00785112	-0.191843	-0.109641	-0.634592	-0.335	-0.465569	-0.517922	0.264245	0.223636	-0.216811	-0.429434	-0.177707	greenyellow|0.7038
GRHPR|NP_036335.1	M11	greenyellow	0.285888	0.323741	0.0893945	0.27738	0.656105	0.494792	0.00368279	0.428078	0.695714	0.337475	0.0523648	-0.129562	-0.125286	-0.0113259	-0.0407174	-0.0734237	0.196956	-0.141668	-0.15388	-0.715229	-0.364215	-0.546599	-0.565817	0.0556062	-0.0574149	-0.197844	-0.57519	0.201303	greenyellow|0.6957
SLC2A3|NP_008862.1	M11	greenyellow	-0.0243934	-0.00775373	-0.175633	-0.205706	0.0938062	0.368135	0.477333	0.492554	0.653526	0.34573	-0.247946	0.330851	-0.239782	-0.146	0.25652	0.0531347	0.485842	0.0225422	0.0334159	0.0908934	-0.0225793	-0.344435	-0.0603042	0.380564	-0.254557	0.0495081	0.00179219	0.22966	greenyellow|0.6535
SIGMAR1|NP_671513.1	M11	greenyellow	-0.245216	-0.0303051	0.249945	0.391158	0.42685	0.0768275	0.389863	0.628777	0.652545	0.510102	0.356316	-0.547086	-0.485807	-0.0185063	-0.0407056	0.1356	0.0716228	-0.0970064	0.031216	-0.335454	-0.237441	-0.49259	-0.484689	0.318349	-0.0464813	-0.226459	0.120526	-0.0880362	greenyellow|0.6525
CTSD|	M11	greenyellow	0.0854137	-0.185737	-0.00184881	0.215883	0.347615	0.424739	0.39247	0.374335	0.648189	0.440098	0.00989763	-0.110299	-0.335537	-0.0477969	-0.0581524	0.106325	0.342471	0.0604547	0.0988734	-0.207129	0.00719903	-0.289537	-0.41261	0.204189	-0.013511	0.128247	0.155138	0.26609	greenyellow|0.6482
CLASP2|NP_001193973.1	M11	greenyellow	0.0919032	-0.0424024	-0.172374	0.16565	0.300781	0.534136	0.292817	0.265059	0.637474	0.286986	0.111862	0.00544765	-0.0517688	-0.0447805	0.233236	0.185942	0.471803	0.0826444	-0.0285596	-0.165115	-0.0335769	-0.293208	-0.259987	0.232844	-0.222017	-0.231229	-0.169527	0.243641	greenyellow|0.6375
ACOT13|NP_060943.1	M11	greenyellow	0.148159	0.298956	0.0944548	0.0672573	0.330158	0.495235	0.483703	0.53964	0.631618	0.396935	-0.334661	0.113909	-0.242658	-0.0721961	0.000398472	0.0628623	0.324344	-0.273423	-0.181689	-0.254084	-0.0471524	-0.497019	-0.469051	0.0350732	-0.0759558	0.243788	-0.112009	0.00770283	greenyellow|0.6316
FAHD1|NP_001135870.1	M11	greenyellow	0.263125	0.648572	0.0396143	0.20661	0.337748	0.386513	0.151759	0.419839	0.625802	0.397079	0.0072852	0.0165076	0.0986704	0.125537	0.184238	0.0268832	0.284436	-0.184178	-0.135392	-0.468997	-0.222515	-0.43727	-0.297118	0.021482	-0.118647	-0.296478	-0.590056	-0.134942	greenyellow|0.6258
DST|NP_056363.2	M11	greenyellow	0.311728	0.383179	-0.0442733	0.47266	0.286792	0.305735	0.411886	0.508524	0.60078	0.235241	0.1559	-0.233739	0.0294012	0.0708321	0.112378	0.314682	0.234634	-0.271038	-0.348934	-0.194692	-0.0336896	-0.348877	-0.315582	-0.0965641	-0.193417	-0.212347	-0.295181	-0.475374	greenyellow|0.6008
GPI|NP_000166.2	M11	greenyellow	0.259534	0.521116	-0.219271	0.247729	0.223285	-0.0491803	0.370625	0.330532	0.588416	0.380081	0.234718	-0.0628188	0.151418	0.277611	0.242529	0.271679	0.396499	-0.0520155	0.0642175	-0.505054	0.0605228	-0.277758	-0.283296	-0.0149749	-0.0249608	-0.262767	-0.480502	-0.103522	greenyellow|0.5884
YKT6|NP_006546.1	M11	greenyellow	-0.339226	0.0341271	-0.0497065	-0.069943	0.130014	0.0138998	0.479979	0.549917	0.584438	0.425205	0.0336457	-0.0512279	-0.365284	-0.0282338	0.294856	0.186255	0.329438	-0.015223	0.0526683	0.00423305	-0.0443836	-0.399047	-0.153877	0.189243	-0.254139	-0.132472	0.229675	-0.0361228	greenyellow|0.5844
TTN|NP_596869.4	M11	greenyellow	-0.396221	0.282252	-0.0302419	-0.0596925	0.416399	0.185813	-0.182584	0.332506	0.583765	0.119636	0.0860853	0.120177	-0.196651	-0.164663	0.221792	-0.261986	0.134083	0.21475	0.143231	-0.381537	-0.204701	-0.477741	-0.181506	0.240958	-0.244652	-0.492328	-0.258416	0.365935	greenyellow|0.5838
ACTR3|NP_005712.1	M11	greenyellow	0.240409	0.034219	-0.187833	-0.0649962	0.0606654	0.126681	0.27041	0.36275	0.582663	0.51765	-0.178493	0.194691	0.0860129	0.304989	0.108467	0.156214	0.42564	0.130394	0.239751	-0.349017	0.216408	-0.163016	-0.190063	0.329895	0.286713	0.176141	-0.186703	0.0206429	greenyellow|0.5827
GABRA1|NP_001121120.1	M11	greenyellow	0.213037	0.505051	-0.240886	-0.0105129	0.205765	0.126529	0.232787	0.412389	0.551348	0.0800469	-0.234396	0.193802	0.130302	-0.0407315	0.400747	0.00733264	0.240262	-0.201166	-0.375943	-0.332125	-0.288227	-0.375136	0.00324131	-0.0470389	-0.411714	-0.199988	-0.400507	-0.22661	greenyellow|0.5513
NDRG2|NP_963831.1	M11	greenyellow	-0.151166	0.031639	-0.306781	0.106714	0.144036	0.322504	0.388724	0.350196	0.546077	-0.056283	-0.155751	0.105052	-0.0844394	-0.262631	0.329358	0.14319	0.233113	0.0791805	-0.27288	0.000247761	0.0424583	-0.25457	0.0197156	0.0461242	-0.572496	-0.15685	0.20172	-0.100681	greenyellow|0.5461
ATPAF1|NP_073582.3	M11	greenyellow	0.229992	0.196048	0.017332	0.181689	0.258333	0.350523	0.398123	0.451958	0.54249	0.197718	-0.118422	-0.0593601	-0.206572	-0.106339	-0.00751655	0.0443474	0.132262	-0.227057	-0.368625	0.024846	-0.180481	-0.323341	-0.168306	-0.0457826	-0.253994	0.0379681	-0.0597848	-0.316792	greenyellow|0.5425
EPB41L1|NP_036288.2	M11	greenyellow	0.128648	0.207432	0.135769	0.0209343	0.119697	-0.117526	0.449056	0.544239	0.511026	0.518838	0.00142304	-0.0724073	-0.223424	0.153322	0.0692175	0.0959005	0.259689	-0.25396	0.017064	-0.149556	-0.138411	-0.355578	-0.234527	0.288465	0.158332	0.0544428	-0.11162	-0.145084	greenyellow|0.511
FUNDC1|NP_776155.1	M11	greenyellow	-0.0111514	0.427537	0.134438	0.301128	0.446574	0.0424651	-0.241475	0.165965	0.506156	0.444291	0.471154	-0.307157	0.0596836	0.240249	0.122709	-0.172656	0.101336	0.103345	0.279569	-0.714812	-0.384511	-0.328293	-0.324612	0.217024	0.128644	-0.592183	-0.596736	0.164661	greenyellow|0.5062
APEX1|NP_542379.1	M11	greenyellow	0.00369593	0.125398	-0.0493911	-0.148392	-0.0215494	0.307038	0.374994	0.369191	0.505686	0.505785	-0.14417	0.25122	-0.0511064	0.101022	0.217265	0.171754	0.464389	0.0998634	0.199184	-0.103346	0.124557	-0.222058	-0.0797944	0.421447	-0.0243747	-0.0354086	-0.0520096	0.179105	greenyellow|0.5057
PCYOX1|NP_057381.3	M11	greenyellow	0.307399	0.158314	-0.125226	0.0485051	0.359455	0.531252	0.229696	0.338936	0.487092	0.138846	-0.196574	0.188828	-0.0728865	-0.130213	-0.0409545	0.0803562	0.282567	-0.0941565	-0.161757	-0.391058	-0.0434121	-0.363728	-0.362896	0.0717335	-0.172831	0.0780268	-0.420237	0.269471	greenyellow|0.4871
EEF1D|NP_115754.3	M11	greenyellow	0.188412	0.435538	0.218367	0.422156	0.252396	-0.0169312	0.0898699	0.243678	0.476483	0.344032	0.213578	-0.175266	0.0409776	0.21962	-0.105957	-0.107007	0.0880761	-0.0622189	0.176317	-0.412516	0.040812	-0.224887	-0.350044	0.236411	0.413089	-0.148892	-0.288874	-0.0861087	greenyellow|0.4765
ACADVL|NP_001029031.1	M11	greenyellow	0.0191843	0.0683682	-0.249279	0.191255	-0.13892	-0.305863	0.377287	0.244166	0.45706	0.369679	0.330663	-0.154867	0.139077	0.34036	0.306435	0.337296	0.29525	0.248542	0.203864	-0.0822991	0.245669	0.0543162	0.141968	0.301304	0.0387894	-0.316319	0.105018	-0.311921	greenyellow|0.4571
STARD9|NP_065810.2	M11	greenyellow	0.320124	0.309785	-0.0965658	0.26133	0.102098	0.0170784	0.157694	0.23679	0.456393	0.138518	0.106564	0.0320255	0.0617227	0.106953	-0.0106284	0.00429459	0.139741	0.0744668	-0.00440088	-0.0929041	0.112385	-0.0535823	0.00120384	0.0840665	0.0432599	-0.147769	-0.155624	-0.174207	greenyellow|0.4564
TMOD2|NP_001136357.1	M11	greenyellow	-0.0345558	0.441898	0.0167162	0.32709	0.219032	-0.205432	0.14989	0.137055	0.444488	0.488995	0.446111	-0.334539	0.0559375	0.308818	0.236397	0.00841133	0.205916	0.031427	0.308348	-0.439062	-0.205037	-0.179666	-0.225729	0.0214618	0.0782876	-0.381658	-0.258249	-0.0695043	greenyellow|0.4445
SRI|NP_003121.1	M11	greenyellow	0.122109	0.160627	0.118299	0.404502	0.358637	0.472868	0.515066	0.425267	0.430562	0.205225	-0.0322292	-0.142992	-0.43296	-0.253367	-0.287426	0.209633	0.11717	-0.128088	-0.108858	-0.274784	0.13258	-0.32471	-0.499637	-0.136018	-0.265429	0.163334	0.188944	0.198018	greenyellow|0.4306
PSMA2|NP_002778.1	M11	greenyellow	-0.310482	-0.108787	-0.0524709	0.0570773	0.0950405	0.169632	0.535071	0.41718	0.371396	0.272695	0.0561356	-0.18773	-0.434879	-0.191099	0.180156	0.250063	0.188056	-0.0376137	-0.0776135	0.174174	-0.104436	-0.251975	-0.0868065	-0.0419485	-0.516739	-0.0511842	0.432939	-0.0795914	greenyellow|0.3714
SNX3|NP_003786.1	M11	greenyellow	0.139457	0.0771776	-0.0191116	0.12331	0.148684	0.209549	0.506823	0.404272	0.331989	0.292445	-0.214947	-0.0228234	-0.18662	0.0225839	-0.140943	0.316009	0.180373	-0.133343	-0.0620787	-0.336885	0.238184	-0.243411	-0.402112	-0.0471467	-0.0088514	0.34692	0.0810262	-0.038362	greenyellow|0.332
ATP1A3|NP_689509.1	M5	green	0.016446	-0.309356	0.304304	-0.258466	-0.105092	0.111031	0.350368	0.300053	-0.0732644	0.0598102	-0.717386	0.22662	-0.387427	-0.241987	-0.384198	-0.206206	-0.129902	-0.376276	-0.102317	0.282512	0.0223857	-0.13522	-0.175733	0.227564	0.310552	0.940533	0.385786	-0.0392018	green|0.9405
ATP1A1|NP_000692.2	M5	green	0.0660921	-0.255922	0.381496	-0.156643	-0.0383309	0.228356	0.387776	0.331077	-0.0684072	0.0745874	-0.67011	0.164462	-0.434107	-0.283001	-0.480609	-0.175906	-0.151347	-0.433749	-0.135009	0.239758	0.0143052	-0.181486	-0.279606	0.204321	0.290317	0.930791	0.329452	-0.0119945	green|0.9308
ATP12A|NP_001172014.1	M5	green	0.0300816	-0.400671	0.279896	-0.18556	-0.0336502	0.0768977	0.250317	0.290393	-0.118048	-0.137517	-0.665942	0.179409	-0.46731	-0.351302	-0.543864	-0.245242	-0.290029	-0.303646	-0.1757	0.292132	0.0618602	-0.0938367	-0.159222	0.167621	0.257238	0.928474	0.447046	-0.026065	green|0.9285
ATP1A4|NP_653300.2	M5	green	0.0138201	-0.434829	0.242767	-0.24363	-0.0874585	0.0297066	0.247191	0.280142	-0.109455	-0.0829147	-0.658336	0.207399	-0.43678	-0.292282	-0.491227	-0.228594	-0.242781	-0.252257	-0.108083	0.315227	0.0849581	-0.0592312	-0.107463	0.217629	0.293264	0.918628	0.458045	-0.0242918	green|0.9186
SLC6A11|NP_055044.1	M5	green	-0.0454906	-0.558646	0.062387	-0.443238	-0.404922	-0.0251707	0.365518	0.104007	-0.216719	0.0413549	-0.632602	0.331235	-0.269707	-0.142169	-0.191599	-0.0222233	0.00313337	-0.105454	0.0355071	0.576441	0.219045	0.158858	0.18033	0.26148	0.208459	0.845684	0.625438	-0.0158994	green|0.8457
ITGB8|NP_002205.1	M5	green	0.0286183	-0.328391	0.323611	-0.102894	0.0144768	0.2233	0.313602	0.233999	-0.0380068	0.0568733	-0.522851	0.0862567	-0.523815	-0.292491	-0.455112	-0.204291	-0.129888	-0.323636	-0.10826	0.424121	-0.00813537	-0.102798	-0.220213	-0.0232587	0.183182	0.840648	0.509824	-0.00176531	green|0.8406
XPO1|NP_003391.1	M5	green	0.106234	-0.104966	0.164231	-0.215841	0.0617186	0.318377	0.360274	0.393946	0.117941	-0.00769249	-0.772545	0.304058	-0.337914	-0.320383	-0.292607	-0.201949	-0.0588311	-0.403385	-0.278168	0.159839	-0.0579823	-0.273527	-0.230924	0.0542981	0.0550371	0.833864	0.16936	-0.0710961	green|0.8339
CNTNAP1|NP_003623.1	M5	green	-0.00316565	-0.241319	0.525822	0.128539	0.332202	0.251049	0.366246	0.531582	0.144107	0.0710673	-0.505238	-0.174567	-0.746989	-0.43402	-0.612629	-0.260365	-0.315011	-0.531646	-0.308005	0.0552425	-0.243095	-0.409526	-0.533874	0.00918593	0.133815	0.827025	0.451287	-0.0506276	green|0.827
ATP1A2|NP_000693.1	M5	green	0.131548	-0.396688	0.204211	-0.283934	-0.16846	0.146248	0.212297	0.156355	-0.0336703	0.215019	-0.504624	0.31471	-0.3274	-0.0411528	-0.495647	-0.119244	0.0136068	0.00120409	0.250114	0.282793	0.334947	0.0740334	-0.111881	0.322549	0.510891	0.826031	0.359813	0.213782	green|0.826
PRR12|NP_065770.1	M5	green	0.0538814	-0.0967751	0.407254	-0.0365417	0.212767	0.388909	0.50733	0.654993	0.203236	0.0276881	-0.690749	0.121724	-0.681742	-0.518579	-0.538008	-0.198637	-0.203766	-0.530407	-0.36345	0.126427	-0.131727	-0.45458	-0.4057	0.14321	-0.0298318	0.824765	0.300152	-0.0204966	green|0.8248
SLC41A3|NP_001008485.1	M5	green	0.0672282	-0.371511	0.0998841	-0.213075	-0.109563	0.405563	0.467924	0.254446	-0.111641	-0.159918	-0.638946	0.306495	-0.501139	-0.480312	-0.423867	0.010456	-0.0727131	-0.235826	-0.258087	0.545551	0.185946	-0.0397365	-0.0503087	-0.0502696	-0.189847	0.819261	0.539773	0.0864445	green|0.8193
ATP2B3|NP_001001344.1	M5	green	-0.228086	-0.366054	0.215788	-0.429829	-0.0111283	0.0725269	0.099815	0.261416	-0.0809903	-0.278788	-0.873812	0.389036	-0.439562	-0.518918	-0.228158	-0.479124	-0.256008	-0.314891	-0.255167	0.282412	-0.181027	-0.230019	-0.0187933	0.238711	0.043843	0.804516	0.445797	0.135547	green|0.8045
SCN9A|NP_002968.1	M5	green	0.191692	-0.185344	0.0461472	-0.22626	-0.051203	0.393933	0.146042	0.0589301	-0.207094	-0.396796	-0.812605	0.419042	-0.227074	-0.470432	-0.313024	-0.219206	-0.175123	-0.301584	-0.437048	0.381151	0.02744	-0.00331719	0.0246482	-0.246715	-0.17306	0.794869	0.329893	0.0215322	green|0.7949
EPPK1|NP_112598.2	M5	green	0.0688556	-0.0146915	0.517031	0.15942	0.294795	0.0755835	0.47332	0.661325	0.223808	0.0386892	-0.571393	-0.153482	-0.60557	-0.373158	-0.505255	-0.250634	-0.3292	-0.696301	-0.460903	-0.0412208	-0.270265	-0.49998	-0.509025	0.0928375	0.182819	0.791327	0.283741	-0.319775	green|0.7913
MYH10|NP_005955.1	M5	green	0.00624228	-0.447551	0.417935	-0.131307	-0.0711268	-0.0785723	0.197403	0.266141	-0.0561122	0.15644	-0.474357	-0.0309401	-0.37801	-0.0959931	-0.400916	-0.238692	-0.21786	-0.311857	-0.0403382	0.215957	-0.0860165	-0.0780569	-0.159104	0.377008	0.512229	0.774483	0.440718	-0.129518	green|0.7745
TLN2|NP_055874.2	M5	green	0.169132	-0.0708024	0.556855	0.272342	0.376477	0.358846	0.281741	0.470962	0.142486	0.017133	-0.400444	-0.126491	-0.693956	-0.43243	-0.821171	-0.304364	-0.361039	-0.44347	-0.218312	-0.0042047	-0.0954272	-0.34839	-0.576836	0.00762036	0.221481	0.764883	0.261575	0.0475115	green|0.7649
KIF5C|NP_004513.1	M5	green	-0.0334552	-0.322116	0.0731723	-0.256364	-0.253548	0.0556343	0.32134	0.0115028	-0.243824	-0.0969755	-0.564157	0.234474	-0.321127	-0.265181	-0.204302	-0.0961316	-0.0821828	-0.180117	-0.100089	0.56678	0.0992136	0.135264	0.124953	-0.168161	-0.0506733	0.757712	0.656023	-0.0399842	green|0.7577
PPP2R2C|NP_001193925.1	M5	green	-0.0866944	-0.509935	0.248561	-0.150414	-0.289712	-0.182988	0.278494	0.175511	-0.35754	-0.139251	-0.407148	0.00200798	-0.345817	-0.192661	-0.481683	0.0103844	-0.352527	-0.196872	-0.0887353	0.410706	0.232055	0.124324	0.0296637	0.223996	0.279984	0.750246	0.581715	-0.22642	green|0.7502
KIF5B|NP_004512.1	M5	green	0.0319869	-0.29207	0.0475592	-0.21541	-0.242376	0.0963511	0.354331	0.0153364	-0.208207	-0.0975556	-0.554067	0.23384	-0.296794	-0.253577	-0.203023	-0.0616633	-0.053224	-0.189466	-0.140145	0.579638	0.123357	0.139066	0.118938	-0.21061	-0.0707168	0.749731	0.633889	-0.08276	green|0.7497
ATP2B1|NP_001673.2	M5	green	-0.148002	-0.0349114	0.458523	-0.0606267	0.264838	0.0566332	0.210034	0.485953	-0.00560955	-0.375297	-0.760647	0.0953102	-0.58685	-0.662953	-0.418901	-0.516364	-0.480826	-0.676191	-0.552205	0.0591571	-0.382994	-0.495504	-0.322156	0.0705838	-0.028997	0.744346	0.279009	-0.0803653	green|0.7443
MYLK2|NP_149109.1	M5	green	-0.100852	-0.259409	0.264972	-0.297686	-0.243127	-0.268474	0.136129	0.120281	-0.347714	-0.141083	-0.583111	0.121176	-0.114819	-0.107474	-0.218267	-0.186548	-0.295006	-0.414356	-0.1724	0.224998	-0.0288087	-0.0318064	-0.0123245	0.210314	0.385096	0.731917	0.239222	-0.289105	green|0.7319
MLC1|NP_055981.1	M5	green	0.160079	-0.060775	0.247947	0.175449	-0.0332485	0.0800989	0.539479	0.174275	-0.191962	-0.115201	-0.332519	-0.113654	-0.360934	-0.280948	-0.416966	0.0547925	-0.197627	-0.518789	-0.326733	0.359573	0.0439873	-0.0488357	-0.23943	-0.31361	-0.0195013	0.725024	0.392149	-0.29114	green|0.725
HSP90B1|NP_003290.1	M5	green	-0.0448313	0.0745202	0.469628	-0.073348	0.173232	-0.122274	-0.102019	0.156017	-0.207545	-0.275325	-0.618633	0.0880732	-0.308979	-0.336408	-0.48763	-0.591793	-0.515409	-0.501088	-0.229577	-0.107421	-0.26649	-0.260097	-0.294002	-0.00825165	0.352764	0.719411	0.0697891	-0.0490893	green|0.7194
HSP90AB1|NP_031381.2	M5	green	-0.249863	-0.162437	0.665525	0.0439703	0.243469	-0.0822316	0.0179029	0.227439	-0.237567	-0.331062	-0.526029	-0.129692	-0.52075	-0.522716	-0.544202	-0.57333	-0.60332	-0.63069	-0.335289	-0.0236966	-0.370149	-0.375162	-0.424039	0.195768	0.322935	0.698338	0.279803	0.0156965	green|0.6983
ATP2B4|NP_001001396.1	M5	green	-0.158767	0.0118381	0.438685	-0.0684282	0.319733	0.128817	0.15542	0.445693	-0.0200794	-0.46136	-0.810874	0.137362	-0.56253	-0.743098	-0.385777	-0.559577	-0.501206	-0.679823	-0.617055	-0.0440288	-0.446342	-0.532348	-0.326482	0.0377809	-0.139212	0.696798	0.226469	0.0182628	green|0.6968
CNTNAP2|NP_054860.1	M5	green	0.404547	-0.0524599	0.330786	0.258547	0.293551	0.472062	0.383609	0.4084	0.213296	0.221193	-0.293084	-0.0778025	-0.502869	-0.19245	-0.718706	0.0196267	-0.0941379	-0.282211	-0.121767	-0.0858253	0.106647	-0.218878	-0.538766	-0.0957179	0.179218	0.687783	0.132685	0.0490122	green|0.6878
NEFM|NP_005373.2	M5	green	0.239882	-0.186104	-0.0886034	-0.126054	0.137176	0.548407	0.387463	0.252681	0.259973	-0.0277171	-0.655347	0.383851	-0.302563	-0.330083	-0.208135	0.00207846	0.192244	-0.123616	-0.240263	0.100184	0.172011	-0.1626	-0.219562	-0.121345	-0.167155	0.677768	0.300918	0.246889	green|0.6778
EEF1A1|NP_001393.1	M5	green	-0.0333229	-0.129781	0.566329	0.306239	0.19348	0.0396409	0.53383	0.583855	0.123823	0.211741	-0.267705	-0.39603	-0.598832	-0.210358	-0.552616	-0.0114119	-0.309878	-0.562851	-0.247116	-0.0122037	-0.0896102	-0.359445	-0.546133	0.121389	0.273004	0.67555	0.418331	-0.359937	green|0.6756
C2orf47|NP_078796.2	M5	green	0.0198284	-0.287132	0.363693	-0.221281	-0.232002	-0.224514	-0.108837	-0.0155113	-0.546005	-0.295594	-0.408596	0.122726	-0.259837	-0.206953	-0.600226	-0.276319	-0.508621	-0.223089	-0.0631933	0.347484	0.0924946	0.156823	0.0745214	0.114831	0.395604	0.669082	0.2854	-0.0773363	green|0.6691
LRPPRC|NP_573566.2	M5	green	0.162119	-0.382281	0.117281	-0.422747	-0.325986	0.133786	0.0306895	-0.0661651	-0.213208	0.180168	-0.414955	0.433957	-0.136715	0.084088	-0.374432	-0.0482698	0.107157	0.11731	0.33002	0.436583	0.431436	0.246822	0.0700349	0.24237	0.523308	0.66864	0.269525	0.263579	green|0.6686
ATP2B2|NP_001001331.1	M5	green	-0.32457	-0.418663	0.000963607	-0.570501	-0.153886	0.065617	-0.0178118	0.0223116	-0.220561	-0.415216	-0.846563	0.542415	-0.284679	-0.519425	-0.0608429	-0.439248	-0.189412	-0.087875	-0.158789	0.382318	-0.0683029	-0.0493244	0.210173	0.161939	-0.124504	0.667262	0.485774	0.270988	green|0.6673
ARL2|NP_001658.2	M5	green	-0.265312	-0.430863	0.194573	-0.316933	-0.0431313	-0.0759435	0.0596629	0.193288	-0.202449	-0.242635	-0.604581	0.220577	-0.377061	-0.345637	-0.355758	-0.18795	-0.298761	-0.113098	-0.0870753	0.00406972	0.136935	-0.118265	-0.114782	0.27633	0.182365	0.660278	0.457443	0.2142	green|0.6603
ACACA|NP_942133.1	M5	green	0.199624	-0.374875	0.317257	-0.0226398	-0.150002	0.0109433	0.236543	0.182914	-0.278961	-0.109394	-0.26869	-0.0209943	-0.371504	-0.189293	-0.60046	0.0168735	-0.285523	-0.286127	-0.186294	0.468099	0.16827	0.0825355	-0.0644523	0.0978828	0.280343	0.652767	0.356408	-0.185634	green|0.6528
TPRG1L|NP_877429.2	M5	green	-0.249056	0.140624	0.504219	-0.0182146	0.436504	0.248225	0.212872	0.595039	0.15075	-0.318836	-0.758597	0.132859	-0.703838	-0.780387	-0.463298	-0.561744	-0.468753	-0.605528	-0.488996	-0.194969	-0.403898	-0.668835	-0.466827	0.106401	-0.181684	0.621176	0.194646	0.160477	green|0.6212
SRP72|NP_008878.3	M5	green	-0.227104	-0.580457	0.170077	-0.206078	-0.202123	-0.011924	0.132984	0.0893578	-0.169207	0.114099	-0.298319	0.0301086	-0.260227	-0.00165563	-0.334039	0.0311028	-0.108928	0.0629027	0.214402	0.264511	0.333063	0.103814	-0.0965061	0.297417	0.425148	0.615495	0.516151	-0.00145594	green|0.6155
DNM1|NP_004399.2	M5	green	0.0804189	0.00929358	0.0993395	-0.272669	-0.267811	-0.155493	0.10053	0.0424174	-0.162388	0.0471507	-0.586136	0.267929	0.151845	0.117545	-0.0393164	-0.140549	-0.0622511	-0.249383	-0.0292849	0.0567456	0.0858152	0.0395188	0.0422767	0.11795	0.405521	0.609955	0.0616777	-0.290449	green|0.61
SCAMP4|NP_524558.1	M5	green	0.0706962	-0.100002	-0.0447832	-0.203183	-0.172059	0.305143	0.460964	0.141453	-0.0600107	0.193479	-0.361292	0.209902	-0.283534	-0.0678362	-0.191144	0.247697	0.174914	-0.094186	0.0159491	0.432048	0.299258	0.0570723	-0.0701736	-0.355959	-0.142828	0.600141	0.376636	-0.0532177	green|0.6001
NEFH|NP_066554.2	M5	green	0.426273	-0.277155	-0.124152	-0.075703	0.0269206	0.523242	0.240181	0.0737965	0.0926661	0.0779254	-0.42662	0.247923	-0.136713	-0.0683715	-0.274309	0.183666	0.199732	0.00136223	-0.141806	0.155225	0.273997	0.082646	-0.13773	-0.243095	-0.0226159	0.598534	0.226876	0.115333	green|0.5985
GRIA2|NP_001077088.1	M5	green	0.302243	-0.326529	-0.026621	-0.236941	-0.100712	0.436356	0.0439577	-0.0607325	-0.190578	0.0153959	-0.420615	0.215231	-0.103691	-0.0830035	-0.235652	0.00837191	0.0407209	-0.108431	-0.135952	0.42614	-0.000326919	0.159023	0.0361209	-0.281783	-0.0266392	0.598116	0.139612	-0.0272816	green|0.5981
TTYH1|NP_001005367.1	M5	green	0.22607	-0.191506	-0.00731911	-0.207614	-0.10876	0.339215	0.132	0.0643894	-0.187372	-0.103567	-0.564471	0.172685	-0.0549361	-0.142144	-0.132078	0.0257617	-0.0765879	-0.288311	-0.401402	0.342988	-0.0795726	0.0460663	0.0557619	-0.324504	-0.149736	0.595443	0.166236	-0.322557	green|0.5954
C1QBP|NP_001203.1	M5	green	0.0422301	0.0863154	0.135214	-0.296127	-0.0830098	0.108803	-0.158915	-0.199873	-0.526368	-0.528154	-0.642842	0.403956	-0.0915325	-0.398145	-0.308619	-0.355305	-0.342546	-0.312395	-0.287393	0.238422	-0.0385588	0.0402519	0.0491698	-0.38931	-0.0809642	0.593522	0.0675823	0.11401	green|0.5935
PLXNB2|NP_036533.2	M5	green	0.625473	-0.159406	-0.132091	-0.000757147	-0.248791	0.288985	0.231076	-0.219269	-0.202036	0.0197866	-0.256692	0.279383	0.125492	0.126601	-0.359999	0.267612	0.184402	0.0478601	0.0403639	0.279157	0.542124	0.393121	0.0187991	-0.244636	0.238512	0.59346	0.131599	0.0610411	green|0.5935
GRM2|NP_000830.2	M5	green	0.0551223	-0.607029	0.132234	-0.0583136	-0.300484	-0.178532	0.0212966	-0.202319	-0.409432	-0.149041	-0.152388	-0.0178641	-0.127911	0.0178946	-0.388911	0.0221451	-0.179784	0.0184593	0.0763173	0.527559	0.377057	0.378935	0.0847619	0.0492562	0.47353	0.589769	0.590107	-0.0811488	green|0.5898
PLXNC1|NP_005752.1	M5	green	0.16212	-0.328238	0.1658	-0.144691	-0.0198519	0.375482	0.111595	0.121999	-0.186286	-0.150149	-0.494562	0.130736	-0.347701	-0.372107	-0.368921	-0.132112	-0.211213	-0.231142	-0.313306	0.362897	-0.153779	0.00969013	0.0267095	-0.10644	-0.173328	0.587549	0.3209	0.00385878	green|0.5875
SLC4A1|NP_000333.1	M5	green	0.0209377	-0.620326	-0.105308	-0.377417	-0.497187	-0.225363	0.0608092	-0.115449	-0.296839	0.0726135	-0.259643	0.258234	0.0122337	0.219765	-0.255505	0.150953	0.0124078	0.305878	0.353265	0.439481	0.596336	0.444776	0.262296	0.299055	0.520941	0.585416	0.464678	-0.0353386	green|0.5854
ITGB1|NP_391988.1	M5	green	0.289226	0.187397	0.215192	0.22159	0.203942	0.220843	0.240413	0.286547	0.103651	-0.17792	-0.510814	0.0776718	-0.236188	-0.319078	-0.446918	-0.208826	-0.265541	-0.353259	-0.35397	-0.171847	-0.0104199	-0.198446	-0.280031	-0.134789	0.0144174	0.576137	0.109752	-0.116391	green|0.5761
GLS|NP_055720.3	M5	green	0.100759	-0.143653	0.140447	-0.290402	-0.175594	0.163537	0.0985926	0.102436	-0.162595	-0.169171	-0.608339	0.340516	-0.0272555	-0.16362	-0.129071	-0.14288	-0.0611427	-0.33677	-0.286316	0.386368	0.0448427	-0.0484952	0.0328446	0.104848	0.187433	0.573144	0.0876759	-0.1869	green|0.5731
NEFM|NP_001099011.1	M5	green	0.385595	-0.277054	-0.148028	-0.114373	0.0320899	0.521176	0.199891	0.0620935	0.0909796	0.0673915	-0.421002	0.274812	-0.138135	-0.0713111	-0.26218	0.173032	0.201535	0.0451114	-0.112616	0.146191	0.284298	0.079949	-0.125242	-0.249189	-0.0415597	0.569022	0.212736	0.151155	green|0.569
UPF1|NP_002902.2	M5	green	0.522673	-0.155041	0.016506	-0.242758	-0.193759	0.132666	-0.0977946	-0.164973	-0.225914	0.0216534	-0.371071	0.370423	0.112115	0.147092	-0.371649	-0.037848	0.0404261	0.0227632	0.0795641	0.150482	0.295637	0.278019	0.0542941	0.000979407	0.454714	0.563645	-0.0691056	0.128802	green|0.5636
MAPK10|NP_620448.1	M5	green	-0.19982	0.0514969	0.211461	-0.416203	-0.0959106	-0.073523	-0.113434	-0.0221106	-0.264312	-0.266751	-0.751129	0.460328	-0.0838027	-0.303811	-0.12505	-0.49579	-0.252705	-0.233682	-0.0462783	-0.0633495	-0.0991287	-0.134364	0.0159858	0.166671	0.167744	0.560879	0.0927977	0.231882	green|0.5609
MAP2K2|NP_109587.1	M5	green	-0.181606	0.0839429	0.541314	0.13244	0.225585	-0.263667	0.176429	0.385254	-0.111506	-0.0781751	-0.351106	-0.271052	-0.407341	-0.243225	-0.43097	-0.266836	-0.493716	-0.613284	-0.263544	-0.306291	-0.258495	-0.406061	-0.491439	0.0524103	0.303127	0.559212	0.127342	-0.232732	green|0.5592
SNX27|NP_112180.4	M5	green	0.150421	-0.217655	0.164402	-0.00414967	-0.282897	-0.467119	0.162401	-0.143785	-0.451821	-0.0959858	-0.163834	-0.185146	0.0200123	0.102021	-0.167512	-0.00804321	-0.248655	-0.376964	-0.144791	0.308295	-0.0531431	0.239104	0.078491	-0.151956	0.345225	0.54901	0.288371	-0.44666	green|0.549
EGFR|NP_005219.2	M5	green	0.289714	-0.558326	0.0164473	-0.182025	-0.369652	0.0521542	0.149445	-0.206856	-0.319921	0.216406	-0.169828	0.0403061	0.0437039	0.221052	-0.177894	0.232131	0.120736	0.0217424	0.140677	0.384237	0.23344	0.394761	0.127166	0.0783482	0.361302	0.541595	0.337263	-0.0266426	green|0.5416
DSP|NP_004406.2	M5	green	-0.256861	-0.30163	0.165315	-0.360283	-0.257044	-0.0879696	-0.336612	-0.379148	-0.625266	-0.383595	-0.498689	0.280579	-0.0112446	-0.19174	-0.237657	-0.353888	-0.354401	-0.0113771	0.0724934	0.262438	0.108014	0.236987	0.150603	-0.0609533	0.247121	0.541582	0.347665	0.16533	green|0.5416
EIF3A|NP_003741.1	M5	green	0.383758	-0.257754	0.0014876	-0.151289	-0.318253	0.170243	0.16467	-0.156939	-0.0492476	0.40781	-0.161053	0.259049	0.0774611	0.347043	-0.278128	0.134307	0.296377	0.200348	0.442708	0.320456	0.514554	0.361258	0.0187897	0.149299	0.592199	0.540807	0.159545	0.115836	green|0.5408
EIF4A2|NP_001958.2	M5	green	-0.192919	-0.0868055	0.247939	-0.134066	-0.102169	-0.0834126	0.492183	0.550923	0.106947	0.112858	-0.442908	0.0331972	-0.385622	-0.171267	-0.183034	0.0206139	-0.12844	-0.368828	-0.191876	0.232993	0.0573197	-0.275799	-0.1337	0.240451	0.0954073	0.531436	0.352795	-0.38724	green|0.5314
PRPS1L1|NP_787082.1	M5	green	0.308048	0.0804656	-0.283754	-0.244315	-0.209758	0.289202	0.416637	0.0982221	-0.0366027	-0.0530769	-0.483922	0.408403	-0.00355017	-0.0567175	-0.0038247	0.287977	0.242738	-0.159546	-0.268406	0.453078	0.324874	0.0883534	0.0935849	-0.518299	-0.284129	0.519937	0.143381	-0.246052	green|0.5199
ENTPD2|NP_982293.1	M5	green	-0.0722791	-0.277114	0.0358008	0.0225023	0.0456252	0.163743	0.427954	0.121819	0.0524007	0.085525	-0.222301	0.0174106	-0.439258	-0.225316	-0.263162	0.103104	0.0669706	-0.0182322	0.0785781	0.122913	0.228406	-0.0324313	-0.237793	-0.127598	-0.0757811	0.5182	0.560561	0.272945	green|0.5182
ATP9A|NP_006036.1	M5	green	0.281063	-0.260966	0.242035	0.0242708	-0.0265193	0.091866	-0.0787764	0.0814709	-0.215433	-0.138719	-0.279928	0.0120492	-0.213082	-0.148687	-0.600186	-0.164523	-0.375374	-0.087079	-0.116573	0.122468	0.0498351	0.125555	-0.0148727	0.0754263	0.252485	0.510397	0.15954	-0.0792683	green|0.5104
BLVRB|NP_000704.1	M5	green	-0.32288	0.103342	0.646326	0.0879011	0.508334	0.0542689	0.107004	0.538885	0.0706093	-0.356731	-0.59972	-0.107526	-0.693408	-0.759761	-0.435026	-0.654298	-0.604796	-0.73761	-0.549882	-0.281944	-0.640457	-0.713837	-0.520668	0.168188	-0.0791059	0.507342	0.144942	0.0832118	green|0.5073
SEPT2|NP_004395.1	M5	green	0.169642	0.198419	-0.126297	-0.0293351	-0.0979324	0.133687	0.422141	0.0287661	-0.167184	-0.188267	-0.425941	0.173739	0.00887338	-0.151899	-0.0238287	0.202511	0.0362719	-0.35898	-0.349093	0.157702	0.155995	-0.0181667	-0.085701	-0.553151	-0.27916	0.494356	0.115351	-0.256453	green|0.4944
BDH1|NP_004042.1	M5	green	0.408326	0.0648739	-0.341942	-0.225186	-0.18135	0.417261	0.61959	0.222189	0.173559	0.345221	-0.390666	0.334418	-0.0169117	0.108436	0.0591926	0.499473	0.47038	-0.0616298	-0.0837934	0.196967	0.309499	0.0487092	-0.00550414	-0.381221	-0.30883	0.481221	0.066127	-0.119581	green|0.4812
HAPLN4|NP_075378.1	M5	green	0.0596358	-0.479574	0.327098	0.088051	0.244011	0.271699	0.139775	0.280506	0.0908343	0.0788564	-0.250952	-0.179338	-0.503541	-0.281923	-0.444831	-0.107514	-0.185026	-0.18831	-0.165838	-0.0492698	-0.177728	-0.187654	-0.322162	0.203813	0.111198	0.480025	0.3653	0.178784	green|0.48
SNRNP200|NP_054733.2	M5	green	0.432959	-0.155561	0.288555	0.134458	-0.105729	0.0547323	0.281567	0.0642493	-0.0180823	0.518977	0.0931891	-0.120916	-0.175899	0.304097	-0.517254	0.179766	0.122323	-0.0499506	0.365316	0.0933534	0.306673	0.167795	-0.269307	0.161438	0.638964	0.47985	0.0832462	0.0710786	green|0.4799
NEFL|NP_006149.2	M5	green	0.0999728	0.0783204	0.0560271	-0.0457598	0.20922	0.425965	0.317818	0.228277	0.0891646	0.00282879	-0.374704	0.186586	-0.425378	-0.32495	-0.351303	0.0340717	0.0208929	-0.129647	-0.131472	-0.0414473	0.105517	-0.192735	-0.315438	-0.324816	-0.27095	0.472037	0.184479	0.300586	green|0.472
SEPT5|NP_002679.2	M5	green	-0.358541	0.0626665	0.482903	-0.152267	0.357127	0.0474519	-0.0856354	0.342089	-0.100325	-0.21527	-0.547573	-0.0553524	-0.501233	-0.506279	-0.261191	-0.545861	-0.489945	-0.599185	-0.386519	-0.169016	-0.633784	-0.540999	-0.373498	-0.0731348	-0.0828237	0.460826	0.0272089	-0.00896118	green|0.4608
CPT2|NP_000089.1	M5	green	-0.119303	-0.310822	0.46765	-0.000607158	-0.184799	-0.345179	0.0358972	0.165208	-0.306997	0.0715587	-0.0332355	-0.232125	-0.382005	-0.00968169	-0.568242	-0.150566	-0.443864	-0.143157	0.148791	0.338543	0.0680415	0.109376	-0.0271364	0.266061	0.509091	0.460354	0.397615	-0.261859	green|0.4604
VWF|NP_000543.2	M5	green	0.377193	0.00154762	0.233803	0.157597	0.187748	0.258405	0.201321	0.210002	-0.0115592	-0.0475485	-0.211674	-0.00860613	-0.282615	-0.165331	-0.601648	0.0639756	-0.168736	-0.243685	-0.225401	-0.123883	0.163177	-0.12686	-0.361195	-0.0945524	0.145917	0.456973	-0.0262152	0.0426784	green|0.457
PITPNA|NP_006215.1	M5	green	-0.0356391	-0.185306	0.122998	-0.159193	-0.103429	0.00838911	0.257802	0.166373	-0.0651289	0.153388	-0.30657	-0.0150317	-0.247455	-0.097467	-0.157381	-0.0790625	-0.126233	-0.1697	-0.0296297	0.161714	-0.175963	-0.0224569	0.0255386	0.0618435	-0.0198563	0.454733	0.238383	-0.153734	green|0.4547
GUK1|NP_001152862.1	M5	green	0.0801492	-0.169905	-0.338197	-0.345941	-0.531002	-0.332198	0.381004	0.0149659	-0.132679	0.248936	-0.251818	0.205476	0.21147	0.407511	0.17318	0.43418	0.245237	0.104219	0.164774	0.32358	0.491411	0.334385	0.283774	-0.123508	0.17367	0.44515	0.307593	-0.462396	green|0.4452
KCNA2|NP_004965.1	M5	green	0.473674	-0.207303	-0.0269994	0.103143	0.0817058	0.492352	0.48949	0.199398	0.241794	0.3952	-0.0617791	-0.00549505	-0.301328	0.0262347	-0.283079	0.331238	0.34626	-0.0838808	0.000532636	0.234221	0.175656	0.00838049	-0.264556	-0.216724	-0.0277347	0.444598	0.167156	0.104669	green|0.4446
MPP6|NP_057531.2	M5	green	-0.0102008	-0.436255	0.360406	-0.167465	0.0173838	0.173652	0.0227096	0.226765	-0.097537	0.112063	-0.291713	-0.0199793	-0.418887	-0.190486	-0.399964	-0.124515	-0.198834	-0.149969	-0.0583736	0.137315	-0.13631	-0.0929862	-0.112031	0.305458	0.189463	0.438056	0.284673	0.129884	green|0.4381
SPTA1|NP_003117.2	M5	green	0.180715	-0.127409	0.068179	-0.159588	-0.351868	-0.204474	0.0599921	-0.261598	-0.293675	0.179966	-0.0798371	0.202634	0.040121	0.229142	-0.17853	-0.00458899	0.1379	0.0559397	0.431703	0.337138	0.353055	0.353116	0.0864247	0.0140184	0.512481	0.437815	0.217524	0.184458	green|0.4378
RPS13|NP_001008.1	M5	green	-0.0387402	-0.249083	0.0112317	-0.241061	-0.196231	0.116655	0.306099	0.0409815	-0.253028	0.104578	-0.257648	0.043617	-0.182662	-0.0326015	-0.059169	0.285298	0.0729743	-0.177873	-0.0897235	0.304997	0.108141	0.0545086	-0.0291939	-0.245835	-0.118225	0.437364	0.321012	-0.0792085	green|0.4374
SLC8A2|NP_055878.1	M5	green	-0.0908921	0.325408	0.354011	-0.089379	0.0431257	-0.262056	0.0399171	0.233052	-0.114334	-0.227216	-0.516367	0.144105	-0.242363	-0.311208	-0.218985	-0.490988	-0.401621	-0.462767	-0.239039	-0.0570518	-0.277273	-0.254009	-0.0648022	0.00713246	0.0934332	0.425357	0.0753096	-0.132429	green|0.4254
[truncated: 546 more rows]

## Sheet: Table S3
Table S3: Protein Abundance (Signal/Noise) for All Proteins (n=3995) and Top Group Members (n=1808; Green Rows)
[truncated: 3,997 more rows]

[truncated: 1 more sheets: Table S4]
